# Supplementary material for: Ataxin-2, Twenty-four, and Dicer-2 are components of a noncanonical cytoplasmic polyadenylation complex
Source: Life Sci Alliance. 2022 Sep 16;5(12):e202201417. doi: 10.26508/lsa.202201417 (PMC9481931; doi:10.26508/lsa.202201417)
Supplement: Supplementary file 3 [file LSA-2022-01417_TableS1.xlsx]

## Sheet: Dcr-2 IP vs input
Adjusted p-value < 0,001 and log2 Fold Change > 0,584962 (i.e. 1,5 fold)
FlyBase ID	Gene name	log2FC	padj
FBgn0063379	snoRNA:U31:54Ec	5.6534	3.51372e-06
FBgn0086064	snoRNA:Me28S-G3113b	5.55458	5.36945e-05
FBgn0038063	Octβ2R	5.0586	2.51767e-05
FBgn0039214	puf	4.86374	1.22824e-126
FBgn0051858	t-cup	4.77724	2.36271e-07
FBgn0030215	CG15296	4.76817	0.00060205
FBgn0263994	CG43737	4.73066	1.62903e-05
FBgn0029167	Hml	4.62457	6.52155e-05
FBgn0034605	Ugt49C1	4.62208	1.17445e-06
FBgn0262204	mir-2279	4.61211	0.000574286
FBgn0082930	snoRNA:Me28S-G2703b	4.59305	4.26835e-05
FBgn0029606	CG14052	4.5553	0.000190099
FBgn0030569	CG9411	4.49555	0.000966049
FBgn0052806	CG32806	4.40586	0.000926374
FBgn0063387	snoRNA:U27:54Eb	4.3941	8.56855e-05
FBgn0031107	HERC2	4.34069	1.81895e-32
FBgn0034070	SP2353	4.33389	1.03006e-10
FBgn0264826	lncRNA:CR44034	4.3009	0.000108127
FBgn0013733	shot	4.29683	2.98288e-85
FBgn0262858	MtnF	4.28965	0.000278545
FBgn0262593	Shab	4.28691	1.45537e-08
FBgn0264723	lncRNA:CR43991	4.24607	0.000804565
FBgn0024836	stan	4.23829	3.23008e-08
FBgn0063380	snoRNA:U31:54Eb	4.22814	0.000438091
FBgn0036985	zye	4.22267	6.1192e-09
FBgn0262483	Rbp	4.22129	4.11695e-16
FBgn0053196	dpy	4.2086	2.42751e-13
FBgn0267237	lncRNA:CR45677	4.18197	0.000150987
FBgn0063373	snoRNA:snR38:54Ec	4.16821	9.95396e-06
FBgn0063374	snoRNA:snR38:54Eb	4.16003	0.000142933
FBgn0039257	tnc	4.10384	2.81757e-07
FBgn0030266	CG11122	4.08117	1.49157e-131
FBgn0011286	RyR	4.07866	9.50693e-29
FBgn0027655	htt	4.0706	2.1442e-95
FBgn0038693	unc79	4.05527	1.65486e-13
FBgn0053087	LRP1	4.05321	7.04892e-125
FBgn0004449	Ten-m	4.04525	1.58301e-68
FBgn0266098	rg	4.03265	7.73633e-50
FBgn0267656	lncRNA:CR45994	4.01852	1.98481e-09
FBgn0000287	salr	4.01202	1.56578e-06
FBgn0287725	sov	3.99754	1.70565e-96
FBgn0085482	CG34453	3.9965	6.95114e-05
FBgn0043884	mask	3.9941	1.45694e-108
FBgn0265296	Dscam2	3.99312	8.74553e-10
FBgn0052529	Hers	3.97279	4.97023e-87
FBgn0261671	tweek	3.96813	5.39865e-62
FBgn0054057	CG34057	3.96715	9.73781e-05
FBgn0004620	GluRIIA	3.96631	4.45316e-15
FBgn0086906	sls	3.96286	4.83233e-11
FBgn0036365	cmb	3.95983	1.55829e-84
FBgn0265002	CG44153	3.93273	0.000372405
FBgn0063383	snoRNA:U29:54Ec	3.92564	3.68343e-05
FBgn0265523	Smr	3.91775	4.72412e-94
FBgn0264273	Sema2b	3.91379	4.44731e-08
FBgn0023458	Rbcn-3A	3.90174	4.69155e-104
FBgn0085479	CG34450	3.90076	2.34294e-07
FBgn0001075	ft	3.89829	1.03992e-19
FBgn0264901	lncRNA:CR44092	3.89648	3.47303e-62
FBgn0039536	unc80	3.88054	6.41215e-17
FBgn0031735	CG11029	3.86575	9.27737e-06
FBgn0028863	stol	3.86477	1.17095e-06
FBgn0039633	Bicra	3.85466	2.46343e-110
FBgn0259108	futsch	3.84027	8.55826e-49
FBgn0087005	rtp	3.83915	0.000164872
FBgn0263980	Stacl	3.82954	3.49789e-10
FBgn0267516	pre-rRNA:CR45856	3.82567	7.68248e-08
FBgn0026427	Su(var)2-HP2	3.82287	1.08143e-35
FBgn0030600	hiw	3.81881	1.15451e-38
FBgn0087008	e(y)3	3.81595	3.59714e-109
FBgn0266717	Bruce	3.79593	2.0244e-96
FBgn0286782	flz	3.79346	1.48764e-13
FBgn0029864	CG15894	3.79245	1.41044e-13
FBgn0032268	CG6138	3.78757	0.000118074
FBgn0086065	snoRNA:Me28S-G3113a	3.7858	2.43393e-05
FBgn0016977	spen	3.7829	3.46026e-131
FBgn0267001	Ten-a	3.77932	1.70371e-87
FBgn0267348	LanB2	3.77888	1.34586e-32
FBgn0261617	nej	3.77604	3.40177e-110
FBgn0260793	2mit	3.77248	3.19345e-07
FBgn0263705	Myo10A	3.76582	2.65994e-70
FBgn0086677	jeb	3.75311	1.39748e-11
FBgn0085412	kmr	3.75193	5.36905e-76
FBgn0003048	pcx	3.73866	8.77369e-92
FBgn0085413	CG34384	3.73705	2.94669e-19
FBgn0031879	uif	3.73505	4.39991e-55
FBgn0261260	mgl	3.73477	1.28987e-48
FBgn0261041	stj	3.71828	1.99547e-09
FBgn0032414	CG17211	3.71341	0.000879965
FBgn0031602	CG15431	3.71196	0.00096204
FBgn0265045	Strn-Mlck	3.70925	8.00938e-39
FBgn0284408	trol	3.70871	3.10332e-62
FBgn0010051	Itpr	3.69466	9.65295e-118
FBgn0267457	asRNA:CR45807	3.69414	1.78568e-11
FBgn0039332	alrm	3.68365	3.05197e-05
FBgn0031857	LUBEL	3.68212	1.41749e-06
FBgn0085447	sif	3.67444	1.31717e-11
FBgn0034978	CG3257	3.67227	5.98944e-07
FBgn0002526	LanA	3.6685	3.86816e-11
FBgn0002917	na	3.66684	5.52333e-20
FBgn0028496	CG30116	3.66643	2.53299e-05
FBgn0041234	Gr59f	3.66199	8.93309e-08
FBgn0004647	N	3.65954	5.85497e-118
FBgn0001991	Ca-α1D	3.65115	3.8429e-24
FBgn0039728	CG7896	3.64971	1.18552e-08
FBgn0022710	Ac13E	3.64665	2.19013e-50
FBgn0086690	Plp	3.64578	6.95246e-85
FBgn0267696	lncRNA:CR46032	3.64213	0.000133563
FBgn0028875	nAChRα5	3.6376	1.27405e-24
FBgn0283476	Dhc16F	3.62894	4.27309e-07
FBgn0263986	cd	3.62831	3.12327e-13
FBgn0034985	CG3328	3.62804	4.35586e-09
FBgn0082926	snoRNA:Me28S-U1848	3.62761	1.73444e-05
FBgn0267390	dop	3.62557	8.71005e-128
FBgn0053558	mim	3.6251	9.02604e-114
FBgn0032151	nAChRα6	3.62343	1.32545e-06
FBgn0261262	CG42613	3.62128	7.07942e-06
FBgn0263392	Tet	3.62104	4.82786e-13
FBgn0016081	fry	3.61532	4.23803e-120
FBgn0263239	dar1	3.61195	8.17271e-15
FBgn0000414	Dab	3.60814	1.65593e-101
FBgn0264495	gpp	3.59419	4.40838e-77
FBgn0052702	Cubn	3.58751	8.4486e-100
FBgn0264089	sli	3.58599	3.53573e-71
FBgn0053971	Ir62a	3.58568	5.07202e-15
FBgn0036398	upSET	3.56656	1.07361e-125
FBgn0015609	CadN	3.56175	1.40478e-109
FBgn0033661	CG13185	3.56074	8.81868e-130
FBgn0052656	Muc11A	3.55995	7.46678e-06
FBgn0259734	Nost	3.55005	2.04761e-103
FBgn0024941	RSG7	3.54954	1.82103e-05
FBgn0261836	Msp300	3.54501	5.24696e-18
FBgn0033484	CG2269	3.5444	8.87251e-07
FBgn0039883	RhoGAP100F	3.54	5.85298e-39
FBgn0039016	Dcr-1	3.52986	2.985e-122
FBgn0013811	Dhc62B	3.52749	7.69683e-16
FBgn0085434	NaCP60E	3.52734	5.25838e-54
FBgn0031118	RhoGAP19D	3.52692	1.3917e-107
FBgn0086067	snoRNA:Me28S-A771	3.52537	0.000193933
FBgn0032821	CdGAPr	3.5232	2.49973e-80
FBgn0085430	Dora	3.51999	6.70893e-100
FBgn0033159	Dscam1	3.51527	9.71954e-114
FBgn0038975	Nrx-1	3.51348	8.99212e-09
FBgn0024963	GluClα	3.51152	1.43851e-05
FBgn0266756	btsz	3.50802	3.09294e-114
FBgn0262160	CG9932	3.50782	2.08823e-12
FBgn0250754	CG42232	3.49732	1.60042e-155
FBgn0023172	RhoGEF2	3.49076	8.74992e-113
FBgn0031820	Daxx	3.48563	1.12341e-70
FBgn0004198	ct	3.48553	3.4521e-09
FBgn0053497	Sdic2	3.48302	0.000308095
FBgn0030558	Tat	3.48285	0.000630561
FBgn0026059	Mhcl	3.4824	5.48408e-102
FBgn0267627	lncRNA:CR45965	3.48219	4.34357e-11
FBgn0003415	skd	3.47916	4.75774e-113
FBgn0033806	FLASH	3.47869	9.18377e-70
FBgn0260442	rhea	3.47685	1.27592e-124
FBgn0037924	CG14712	3.47111	3.98789e-22
FBgn0031981	Megf8	3.46944	5.13359e-96
FBgn0035106	rno	3.46876	4.12383e-104
FBgn0260964	Vmat	3.46624	7.46868e-06
FBgn0025726	unc-13	3.46568	4.55024e-11
FBgn0085408	Shrm	3.463	1.37018e-116
FBgn0266390	lncRNA:CR45030	3.46186	3.00845e-09
FBgn0085734	CR40450	3.45287	9.34543e-33
FBgn0052311	zormin	3.45131	1.50252e-18
FBgn0285955	cv-c	3.44885	2.12988e-15
FBgn0030674	HUWE1	3.43759	2.8321e-124
FBgn0262719	CG43163	3.42883	9.59715e-113
FBgn0261046	Dscam3	3.42637	2.319e-09
FBgn0051221	CG31221	3.42544	1.42108e-05
FBgn0283427	FASN1	3.4254	1.82197e-148
FBgn0031294	IA-2	3.42288	6.74529e-19
FBgn0002926	ndl	3.42151	3.52843e-40
FBgn0053988	Mid1	3.42001	3.24902e-10
FBgn0004197	Ser	3.41791	9.11747e-09
FBgn0259233	CG42331	3.41694	4.88365e-07
FBgn0035617	l(3)psg2	3.40891	8.62536e-140
FBgn0261574	kug	3.40644	2.25622e-41
FBgn0050020	CG30020	3.40378	1.66872e-88
FBgn0261885	osa	3.39852	8.37039e-124
FBgn0011722	Tig	3.39094	6.91301e-09
FBgn0259994	OtopLa	3.39007	7.21724e-08
FBgn0033636	tou	3.38889	1.40772e-163
FBgn0030706	Lrp4	3.38845	8.92166e-06
FBgn0267602	lncRNA:CR45940	3.38808	1.52168e-07
FBgn0029834	CG5937	3.38238	2.9034e-22
FBgn0031835	Dpp10	3.38068	0.000167602
FBgn0020306	dom	3.37755	2.44044e-153
FBgn0261588	pdm3	3.37586	7.48918e-06
FBgn0023518	trr	3.37579	2.99682e-157
FBgn0039808	CG12071	3.37203	1.25773e-09
FBgn0032136	Apoltp	3.36589	9.78003e-15
FBgn0020278	loco	3.36032	3.13601e-85
FBgn0265040	lncRNA:CR44157	3.35883	1.33455e-06
FBgn0040505	Alk	3.35716	6.48244e-19
FBgn0263072	CG43347	3.35634	2.46989e-07
FBgn0284247	ds	3.35604	2.41142e-11
FBgn0263257	Cngl	3.35574	0.000710361
FBgn0053519	Unc-89	3.35192	1.42207e-12
FBgn0261563	wb	3.35008	2.97117e-62
FBgn0288310	mv	3.34685	3.79174e-105
FBgn0261649	tinc	3.34331	4.01232e-63
FBgn0043362	bchs	3.34082	8.19469e-123
FBgn0004649	yl	3.34045	1.81887e-58
FBgn0031169	CG1494	3.33707	3.83238e-13
FBgn0082831	pps	3.33337	6.23244e-169
FBgn0267641	lncRNA:CR45979	3.33282	4.20713e-15
FBgn0266349	asRNA:CR44998	3.33186	0.000277772
FBgn0039045	Ctns	3.3315	6.1543e-07
FBgn0003189	r	3.32389	5.01661e-99
FBgn0033108	CG15236	3.32321	1.42463e-11
FBgn0032683	kon	3.32311	1.29846e-15
FBgn0031034	CG14205	3.32126	0.00058237
FBgn0052971	CG32971	3.31656	1.42873e-06
FBgn0263995	cpo	3.31291	1.59154e-07
FBgn0265194	Trpm	3.31252	4.31232e-78
FBgn0004607	zfh2	3.30488	3.60325e-37
FBgn0021764	sdk	3.30283	3.21922e-43
FBgn0085409	smal	3.3011	1.43973e-15
FBgn0262127	kibra	3.30075	1.28176e-40
FBgn0261797	Dhc64C	3.29431	4.68328e-110
FBgn0003301	rut	3.29064	4.58799e-44
FBgn0261928	CG42795	3.28079	0.000609794
FBgn0024189	sns	3.27914	2.28722e-06
FBgn0004595	pros	3.27804	2.30928e-58
FBgn0003137	Ppn	3.27204	3.791e-08
FBgn0024232	gprs	3.27094	6.6872e-15
FBgn0259685	crb	3.27093	5.59222e-88
FBgn0266304	asRNA:CR44969	3.2709	5.90636e-08
FBgn0261800	LanB1	3.26622	4.49111e-32
FBgn0011653	mas	3.2659	4.30061e-22
FBgn0039852	nyo	3.26582	3.58972e-05
FBgn0041182	Tep2	3.26188	7.4602e-22
FBgn0013812	Dhc93AB	3.26139	0.000127959
FBgn0263467	snoRNA:nop5-x16-a	3.25933	6.88808e-05
FBgn0261453	scaRNA:MeU2-C41	3.25628	3.40619e-12
FBgn0038439	Cad89D	3.25485	0.000507612
FBgn0051774	fred	3.24967	0.000843343
FBgn0016641	PTP-ER	3.24724	3.09377e-81
FBgn0045852	ham	3.24503	5.41734e-23
FBgn0039380	CG5890	3.24462	2.07501e-15
FBgn0263490	mld	3.23774	2.04476e-104
FBgn0051245	CG31245	3.23546	0.000120852
FBgn0029791	AdamTS-B	3.2346	3.7701e-09
FBgn0263846	CG43707	3.23408	5.97953e-06
FBgn0086408	stl	3.23212	1.36196e-07
FBgn0286071	AdamTS-A	3.22977	3.19908e-16
FBgn0016061	side	3.22674	1.34311e-10
FBgn0085249	CG34220	3.2262	1.53732e-07
FBgn0287775	18w	3.22237	5.87435e-63
FBgn0085400	side-V	3.21786	1.02656e-33
FBgn0038881	aus	3.21744	3.30784e-17
FBgn0285944	para	3.21483	2.89725e-06
FBgn0003977	vir	3.21424	4.34646e-153
FBgn0030017	CG2278	3.21156	2.53606e-63
FBgn0013813	Dhc98D	3.2114	3.07074e-39
FBgn0041111	lilli	3.20853	1.08986e-24
FBgn0036962	CG17122	3.20815	2.74446e-13
FBgn0035168	Cep290	3.20651	1.08043e-11
FBgn0004885	tok	3.20538	1.28258e-46
FBgn0283499	InR	3.20491	2.59074e-99
FBgn0263648	lncRNA:CR43639	3.20429	3.84906e-08
FBgn0266084	Fhos	3.20384	1.21068e-44
FBgn0033657	Sln	3.20244	8.2199e-33
FBgn0263132	Cht6	3.20086	2.84893e-22
FBgn0264606	Fife	3.19774	1.82546e-05
FBgn0052677	X11Lβ	3.1965	1.82934e-10
FBgn0264442	ab	3.19564	2.55802e-07
FBgn0085263	CG34234	3.19435	2.68922e-09
FBgn0051815	CG31815	3.19377	1.80991e-05
FBgn0259140	Cubn2	3.19133	3.84863e-20
FBgn0032010	CG8086	3.19122	2.14007e-06
FBgn0265991	Zasp52	3.19117	1.26983e-39
FBgn0052181	CG32181	3.19019	0.000137176
FBgn0036004	Jarid2	3.18998	5.19983e-176
FBgn0263197	Patronin	3.18654	3.53983e-85
FBgn0263873	sick	3.18118	3.07873e-22
FBgn0035918	Cdc6	3.17966	1.49907e-65
FBgn0024277	trio	3.17913	2.31616e-75
FBgn0032817	CG10631	3.17849	2.21121e-96
FBgn0001250	if	3.17801	9.66802e-67
FBgn0039026	CG7029	3.17696	1.00254e-78
FBgn0029091	Chs2	3.17337	8.30647e-06
FBgn0266262	lncRNA:CR44957	3.172	0.000254645
FBgn0032129	jp	3.16958	1.21302e-08
FBgn0038073	CG14395	3.16949	0.000526674
FBgn0264562	Hr4	3.16785	2.67584e-07
FBgn0010473	tutl	3.1658	7.98737e-76
FBgn0039075	CG4393	3.16449	9.37003e-08
FBgn0000464	Lar	3.16395	1.07006e-59
FBgn0015774	NetB	3.1595	4.07198e-30
FBgn0263968	nonC	3.15829	4.89926e-134
FBgn0261788	Ank2	3.15568	1.3314e-06
FBgn0035260	CG7991	3.14659	1.93696e-06
FBgn0031414	eys	3.14468	5.26153e-06
FBgn0050115	GEFmeso	3.14161	8.49509e-27
FBgn0260965	CG42588	3.14065	1.67277e-51
FBgn0011785	BRWD3	3.14059	1.41739e-170
FBgn0263113	Cc2d2a	3.14001	1.54609e-20
FBgn0038156	side-IV	3.13719	2.34886e-10
FBgn0262167	ana1	3.13714	4.16705e-130
FBgn0000581	E(Pc)	3.13651	3.47752e-123
FBgn0085427	CG34398	3.13639	4.18955e-06
FBgn0003174	pwn	3.13576	1.87836e-06
FBgn0038247	Cad88C	3.13567	6.66492e-30
FBgn0051538	CG31538	3.13548	5.78458e-12
FBgn0085390	Dgk	3.13508	6.79957e-08
FBgn0268063	ltl	3.13464	1.23817e-32
FBgn0037153	olf413	3.13329	1.10724e-12
FBgn0267435	chp	3.13252	8.06913e-16
FBgn0034644	Ip6k	3.13252	5.64314e-98
FBgn0034498	CG16868	3.13195	1.76817e-39
FBgn0051140	CG31140	3.12742	3.31926e-10
FBgn0033574	Spn47C	3.12659	2.54398e-07
FBgn0053147	Hs3st-A	3.12532	2.47404e-06
FBgn0031116	CG1695	3.12307	0.000226976
FBgn0016075	vkg	3.12104	1.82473e-05
FBgn0261786	mi	3.11975	1.02318e-73
FBgn0265546	lncRNA:CR44396	3.1159	1.63245e-06
FBgn0023096	btv	3.11517	0.000123789
FBgn0263465	snoRNA:kis-a	3.11509	4.56957e-05
FBgn0034253	CG10936	3.11418	1.80549e-82
FBgn0250871	pot	3.11162	1.51337e-05
FBgn0267350	Pi4KIIIα	3.10789	1.85172e-112
FBgn0031055	et	3.10784	6.04842e-06
FBgn0051151	wge	3.10668	8.32318e-95
FBgn0038511	cysu	3.10309	0.000197277
FBgn0032395	Wdr81	3.10288	1.0777e-123
FBgn0264386	Ca-α1T	3.10181	8.4751e-12
FBgn0085245	CG34216	3.09875	6.49788e-41
FBgn0061200	Nup153	3.09754	4.46845e-99
FBgn0032723	ssp3	3.09669	2.41168e-137
FBgn0038385	Fbxl7	3.09386	1.89943e-49
FBgn0259246	brp	3.09308	6.98437e-13
FBgn0031424	VGlut	3.09097	2.7059e-05
FBgn0259150	OtopLc	3.09072	3.58707e-06
FBgn0001083	fw	3.08718	1.0293e-05
FBgn0260440	spdo	3.08594	5.63856e-07
FBgn0051909	CG31909	3.08407	4.72169e-05
FBgn0261454	scaRNA:MeU4-A65	3.07938	7.491e-06
FBgn0266429	AstA-R1	3.07502	0.000211662
FBgn0264675	lncRNA:CR43960	3.07475	5.32068e-07
FBgn0261529	ms(2)34Fe	3.07426	0.000123937
FBgn0051871	CG31871	3.0727	0.000840598
FBgn0034662	CG13492	3.07249	0.000178787
FBgn0030376	CG2750	3.07193	2.14446e-05
FBgn0039054	Cow	3.07021	3.35862e-07
FBgn0035538	DopEcR	3.06988	0.000854555
FBgn0004511	dy	3.06966	1.12248e-05
FBgn0002543	robo2	3.06887	1.55313e-44
FBgn0264340	CG43796	3.06819	0.000746413
FBgn0013726	pnut	3.068	1.03708e-68
FBgn0004698	Xpc	3.06776	1.92883e-76
FBgn0030486	Set2	3.0673	8.79135e-117
FBgn0261555	CG42673	3.05833	1.3631e-05
FBgn0011230	poe	3.05765	1.97707e-97
FBgn0004167	kst	3.05578	1.2217e-20
FBgn0085407	Pvf3	3.05464	9.23479e-19
FBgn0031571	bark	3.05376	2.56165e-07
FBgn0031001	CG7884	3.0532	1.35561e-27
FBgn0041096	rols	3.05252	3.15179e-06
FBgn0031432	Cyp309a1	3.05247	2.86654e-05
FBgn0023531	CG32809	3.05116	1.20296e-107
FBgn0039527	CG5639	3.05032	0.000223618
FBgn0028740	CG6362	3.04982	4.01392e-06
FBgn0267624	lncRNA:CR45962	3.04709	2.88363e-16
FBgn0036494	Toll-6	3.04646	1.19365e-31
FBgn0025625	Sik2	3.04639	4.22225e-12
FBgn0039302	Nup358	3.04582	1.70592e-169
FBgn0003053	peb	3.04344	2.02186e-54
FBgn0259212	cno	3.04228	3.92049e-87
FBgn0031759	Kdm5	3.04209	7.4917e-115
FBgn0003862	trx	3.04155	6.96384e-123
FBgn0029840	raptor	3.04117	7.84182e-96
FBgn0262562	CG43102	3.03935	2.02053e-48
FBgn0261575	tobi	3.03873	5.82293e-06
FBgn0035237	CG13917	3.03799	4.63824e-94
FBgn0285917	sbb	3.03772	7.58535e-129
FBgn0003165	pum	3.03606	3.10747e-84
FBgn0031725	DIP-η	3.03518	5.26773e-06
FBgn0027521	CG3679	3.03494	1.27476e-44
FBgn0005666	bt	3.03492	1.73135e-11
FBgn0031251	CG4213	3.03492	1.39541e-18
FBgn0025864	Crag	3.03422	4.7793e-231
FBgn0262819	CG43190	3.03394	3.53687e-08
FBgn0038816	Lrrk	3.02884	1.99662e-177
FBgn0030148	CG3106	3.02787	1.05181e-09
FBgn0003513	ss	3.02208	2.13347e-08
FBgn0063381	snoRNA:Me28S-G3081a	3.02061	0.000232318
FBgn0000542	ec	3.01693	1.0977e-68
FBgn0260003	Dys	3.01662	7.23848e-93
FBgn0034568	CG3216	3.01647	2.12602e-10
FBgn0000119	arr	3.01296	1.82376e-58
FBgn0050361	mtt	3.01171	9.65783e-05
FBgn0005631	robo1	3.01088	3.45808e-21
FBgn0034013	unc-5	3.00985	1.85582e-14
FBgn0051038	CG31038	3.00779	1.27571e-17
FBgn0011828	Pxn	3.00749	5.63452e-08
FBgn0263346	smash	3.00669	7.67238e-164
FBgn0033876	Syngr	3.00631	1.18871e-05
FBgn0031064	CG12531	3.00589	4.87279e-06
FBgn0031078	Nup205	3.00499	1.29236e-160
FBgn0031721	CG14017	3.00477	1.40748e-05
FBgn0027535	botv	3.00382	2.61382e-42
FBgn0030766	mthl1	3.00275	1.6934e-97
FBgn0025641	DAAM	2.99903	4.17059e-113
FBgn0026403	Ndg	2.99748	0.000866397
FBgn0015773	NetA	2.99748	1.03379e-31
FBgn0265082	Cdep	2.99743	5.67993e-52
FBgn0083977	CG34141	2.99639	2.35837e-21
FBgn0003429	slo	2.99404	0.000282996
FBgn0264502	CG43901	2.99299	3.70081e-16
FBgn0004839	otk	2.99037	2.35836e-15
FBgn0015400	kek2	2.98699	9.47119e-07
FBgn0037698	CG16779	2.98681	2.95039e-09
FBgn0033638	atos	2.98478	6.1882e-119
FBgn0003382	sha	2.98015	1.38743e-07
FBgn0036715	Cad74A	2.97869	8.53056e-85
FBgn0025702	Srpk79D	2.9786	5.8771e-42
FBgn0035574	RhoGEF64C	2.97812	1.96021e-73
FBgn0003731	Egfr	2.97742	9.37347e-70
FBgn0032006	Pvr	2.97668	2.17137e-11
FBgn0004391	shtd	2.97668	1.83035e-145
FBgn0042106	CG18754	2.97633	3.68448e-06
FBgn0038934	Gld2	2.97504	2.81925e-31
FBgn0022764	Sin3A	2.97452	4.88894e-144
FBgn0003090	pk	2.97333	2.80382e-06
FBgn0035262	CG18171	2.97128	4.15235e-35
FBgn0082919	snoRNA:Or-CD4	2.96828	1.87832e-05
FBgn0044452	Atg2	2.96559	1.31077e-114
FBgn0001311	kkv	2.96542	5.88228e-09
FBgn0265629	CG44437	2.96448	1.5835e-16
FBgn0267041	asRNA:CR45485	2.96135	4.21505e-43
FBgn0266377	Pde8	2.9601	1.78448e-10
FBgn0037565	CG9626	2.95966	1.52155e-34
FBgn0003463	sog	2.95953	2.25482e-48
FBgn0020762	Atet	2.95786	5.02641e-11
FBgn0039688	Kul	2.95729	6.85908e-32
FBgn0034219	mthl4	2.95594	0.000268723
FBgn0035241	CG12105	2.95558	0.00068972
FBgn0038279	Sdr	2.9521	2.13286e-18
FBgn0004456	mew	2.95086	3.79796e-46
FBgn0082931	snoRNA:Me28S-G2703a	2.95027	1.45096e-08
FBgn0029728	CG2861	2.949	1.22222e-39
FBgn0085397	Fili	2.94551	3.49469e-06
FBgn0003277	Polr2A	2.94265	7.99827e-181
FBgn0264542	hwt	2.94172	6.05851e-143
FBgn0266557	kis	2.94003	2.99282e-63
FBgn0003892	ptc	2.93384	2.42542e-67
FBgn0050062	CG30062	2.93303	6.03777e-17
FBgn0250907	Cht10	2.93218	2.06422e-28
FBgn0000633	tei	2.93033	1.54519e-11
FBgn0036975	CG5618	2.92948	2.98739e-11
FBgn0262509	nrm	2.92943	9.20322e-40
FBgn0259823	CG42404	2.92757	4.18918e-34
FBgn0010482	hlk	2.92714	1.02799e-06
FBgn0033192	Corin	2.92562	1.06221e-09
FBgn0050069	Sdb	2.9251	2.5409e-21
FBgn0262579	Sarm	2.92268	3.10165e-111
FBgn0052369	CG32369	2.92243	3.43482e-09
FBgn0033067	CG11211	2.92145	7.17453e-08
FBgn0033194	Vps13	2.92067	2.55764e-78
FBgn0261934	dikar	2.91953	1.90325e-51
FBgn0027508	Tnks	2.91938	3.60366e-126
FBgn0033313	Cirl	2.91688	1.24035e-69
FBgn0000635	Fas2	2.91447	2.23882e-16
FBgn0041723	rho-5	2.91303	4.42105e-17
FBgn0034476	Toll-7	2.91297	5.22142e-09
FBgn0001253	ImpE1	2.91212	0.000501489
FBgn0028675	Sur	2.91086	0.000615934
FBgn0085436	Not1	2.90978	5.97598e-144
FBgn0267572	asRNA:CR45912	2.90724	1.89213e-12
FBgn0036451	Helz	2.90667	2.63388e-150
FBgn0033860	S-Lap5	2.90609	1.5527e-08
FBgn0004656	fs(1)h	2.9059	1.19203e-110
FBgn0260970	Ubr3	2.90467	5.47072e-139
FBgn0039120	Nup98-96	2.90317	5.27303e-104
FBgn0028371	jbug	2.90302	6.81121e-69
FBgn0261509	haf	2.90222	1.31652e-05
FBgn0003396	shn	2.90105	5.80133e-124
FBgn0261859	CG42788	2.89963	1.73534e-76
FBgn0052767	CG32767	2.89954	6.93807e-149
FBgn0032685	CG10211	2.89951	0.000109799
FBgn0000547	ed	2.89883	5.5333e-35
FBgn0035504	Teh4	2.89622	1.26405e-05
FBgn0004878	cas	2.89549	3.94385e-14
FBgn0000535	eag	2.89317	6.47335e-09
FBgn0261570	raskol	2.89147	8.6498e-89
FBgn0263110	CG43367	2.88825	8.89977e-126
FBgn0086368	tw	2.88791	1.02359e-05
FBgn0029880	CG14443	2.88686	4.13766e-06
FBgn0262614	pyd	2.88676	9.94537e-131
FBgn0085305	CG34276	2.88504	8.47156e-13
FBgn0000179	bi	2.88499	1.54081e-09
FBgn0026874	CG13358	2.88434	1.03727e-10
FBgn0031052	Elys	2.88239	1.51993e-131
FBgn0028996	onecut	2.88173	4.60211e-15
FBgn0262139	trh	2.8813	8.07649e-08
FBgn0270928	VAChT	2.88003	9.38321e-08
FBgn0000299	Col4a1	2.88001	5.941e-06
FBgn0013810	Dhc36C	2.87902	2.57164e-80
FBgn0053752	CG33752	2.87823	0.000123347
FBgn0262582	cic	2.87667	6.62095e-163
FBgn0261931	Hecw	2.87588	1.36369e-128
FBgn0052447	CG32447	2.87545	3.99169e-07
FBgn0259244	CG42342	2.87538	2.6517e-24
FBgn0003380	Sh	2.87399	2.80581e-07
FBgn0036279	Ncc69	2.87298	3.79809e-06
FBgn0052110	CG32110	2.8724	6.00845e-10
FBgn0039530	Tusp	2.86983	3.39691e-09
FBgn0085451	htk	2.86894	4.5145e-91
FBgn0087002	apolpp	2.86861	6.59244e-12
FBgn0035086	CG12851	2.86823	3.19699e-29
FBgn0261999	Ca-Ma2d	2.86734	1.34184e-08
FBgn0261710	nocte	2.86429	1.14066e-90
FBgn0010825	Gug	2.86143	2.53658e-90
FBgn0285896	btl	2.86008	6.76845e-17
FBgn0264449	CG43867	2.85965	3.68607e-90
FBgn0262508	CG43078	2.85731	1.7607e-09
FBgn0039528	dsd	2.85313	1.65474e-93
FBgn0051163	SKIP	2.8526	2.43421e-56
FBgn0034400	CG15099	2.85134	1.52135e-181
FBgn0259984	kuz	2.84916	1.34561e-56
FBgn0039774	CDase	2.84895	0.000289503
FBgn0005677	dac	2.84364	7.17596e-09
FBgn0263019	lncRNA:CR43314	2.84248	5.60954e-19
FBgn0086451	l(2)k09022	2.84195	2.80175e-129
FBgn0266129	lov	2.84134	5.88065e-81
FBgn0032748	CG10492	2.83605	5.39372e-98
FBgn0050015	CG30015	2.83504	3.83625e-86
FBgn0039727	Vps13B	2.83312	1.06249e-127
FBgn0027575	GABA-B-R2	2.83293	1.66091e-17
FBgn0083956	CG34120	2.82883	6.28879e-47
FBgn0263484	snoRNA:Pi4KIIα-a	2.82679	5.37262e-05
FBgn0051678	CG31678	2.82602	4.89416e-67
FBgn0052829	CG32829	2.82577	6.93237e-21
FBgn0260660	Mp	2.8255	0.000336428
FBgn0020521	pio	2.82306	1.29078e-09
FBgn0259736	CG42390	2.82301	0.000925704
FBgn0034588	CG9394	2.82254	2.83514e-05
FBgn0086758	chinmo	2.8208	6.22681e-11
FBgn0053208	Mical	2.82048	1.12612e-178
FBgn0032908	CG9270	2.8181	0.000434352
FBgn0263930	dally	2.81314	1.23319e-17
FBgn0284435	tyn	2.81086	2.29467e-41
FBgn0031216	Zir	2.80939	3.62036e-80
FBgn0034854	Golgin245	2.80888	4.60614e-184
FBgn0264000	GluRIB	2.80747	0.000344064
FBgn0034558	Cib2	2.80612	1.79091e-10
FBgn0020307	dve	2.80603	1.64344e-10
FBgn0038108	CG7518	2.80328	5.76863e-116
FBgn0026160	tna	2.80272	1.45296e-49
FBgn0267577	lncRNA:CR45917	2.80264	1.26662e-20
FBgn0003963	ush	2.80105	2.02475e-39
FBgn0004652	fru	2.79941	0.000306349
FBgn0267033	mamo	2.79843	4.07268e-20
FBgn0036454	CG17839	2.79838	4.46461e-05
FBgn0034240	MESR4	2.79763	9.21769e-91
FBgn0287864	hbs	2.79728	7.81607e-14
FBgn0038826	Syp	2.7967	1.01125e-06
FBgn0037963	Cad87A	2.79641	7.19258e-44
FBgn0038679	CG6040	2.79387	8.59647e-05
FBgn0086908	egg	2.79124	3.06296e-104
FBgn0000017	Abl	2.7896	8.23329e-143
FBgn0035308	CG15822	2.78753	3.28813e-05
FBgn0266019	rudhira	2.7873	4.73722e-128
FBgn0004852	Ac76E	2.78683	9.88345e-05
FBgn0027528	goe	2.78543	7.57965e-23
FBgn0029939	CG9650	2.78492	1.52152e-32
FBgn0031077	THADA	2.78432	4.00699e-84
FBgn0260933	rempA	2.78179	5.81116e-75
FBgn0016917	Stat92E	2.77933	8.44557e-63
FBgn0038014	CG10041	2.77389	0.000597488
FBgn0029881	pigs	2.77383	1.21259e-63
FBgn0033659	Damm	2.77366	2.75781e-05
FBgn0035798	frac	2.77346	3.16392e-05
FBgn0050460	CG30460	2.77312	6.16599e-07
FBgn0002431	hyd	2.77268	7.46338e-93
FBgn0025866	CalpB	2.77211	1.90439e-72
FBgn0034532	CG13436	2.77193	0.000303683
FBgn0042630	Sox21b	2.77132	0.000252849
FBgn0034734	CG4554	2.76988	2.19725e-109
FBgn0036415	CG7768	2.76822	2.77061e-08
FBgn0052436	CG32436	2.76801	8.37517e-12
FBgn0053547	Rim	2.76768	1.87655e-07
FBgn0263397	Ih	2.76692	2.78697e-09
FBgn0039590	CG10011	2.76531	2.04525e-103
FBgn0267458	lncRNA:CR45808	2.76501	1.97225e-06
FBgn0031239	CG17075	2.76445	3.66066e-20
FBgn0264344	CG43800	2.76403	1.69278e-05
FBgn0036725	CG18265	2.76078	3.73489e-05
FBgn0035410	MnM	2.75974	2.61493e-25
FBgn0030662	Chsy	2.75745	3.53011e-08
FBgn0034530	Rcd6	2.75647	3.31441e-11
FBgn0030617	CG9095	2.75493	9.14744e-12
FBgn0000024	Ace	2.75302	9.44935e-06
FBgn0039809	CG15547	2.75272	2.33277e-16
FBgn0283503	Neurl4	2.75188	1.50175e-85
FBgn0031374	Wdr62	2.75095	2.57237e-259
FBgn0259163	CG42268	2.74942	5.695e-05
FBgn0260745	mfas	2.74838	1.94529e-12
FBgn0000395	cv-2	2.74688	5.75363e-54
FBgn0031955	CG14535	2.74657	1.62164e-09
FBgn0039851	mey	2.7439	0.000135348
FBgn0260938	tay	2.74251	4.20098e-155
FBgn0003507	srp	2.74079	6.06877e-68
FBgn0010905	Spn	2.7399	3.34807e-19
FBgn0003733	tor	2.73978	2.00842e-65
FBgn0015278	Pi3K68D	2.73798	2.5766e-111
FBgn0035420	hob	2.73615	1.08983e-68
FBgn0085391	trv	2.73481	1.21594e-06
FBgn0038170	CG14367	2.73207	1.31008e-06
FBgn0259171	Pde9	2.7296	5.93789e-44
FBgn0032479	CG16974	2.72855	1.24472e-63
FBgn0003391	shg	2.72732	1.32557e-46
FBgn0259789	zld	2.72698	3.81718e-77
FBgn0037989	ATP8B	2.72484	0.000340376
FBgn0031698	Ncoa6	2.72318	1.32122e-103
FBgn0034182	SmydA-7	2.72154	7.96758e-14
FBgn0039492	CG6051	2.72115	4.6305e-218
FBgn0038547	CG17803	2.72063	8.60175e-93
FBgn0039709	Cad99C	2.72025	1.16709e-08
FBgn0265356	tn	2.72023	5.90716e-06
FBgn0000636	Fas3	2.71911	0.000156414
FBgn0035145	MED14	2.71474	5.87525e-180
FBgn0037344	CG2926	2.71179	2.07398e-164
FBgn0001077	ftz	2.71012	2.32459e-44
FBgn0263219	Dscam4	2.70868	1.91516e-13
FBgn0024150	Ac78C	2.70779	4.74253e-71
FBgn0086778	nAChRα7	2.70554	0.000193781
FBgn0030961	CG7058	2.70433	1.01189e-05
FBgn0019661	lncRNA:roX1	2.70293	1.08038e-56
FBgn0037836	CG14692	2.70258	0.00078534
FBgn0023090	dtr	2.70224	1.09714e-16
FBgn0266308	lncRNA:CR44973	2.70215	1.95127e-07
FBgn0262111	f	2.70183	4.39138e-15
FBgn0264817	pre-lola-G	2.70154	4.39491e-42
FBgn0003326	sca	2.69923	1.06186e-45
FBgn0264711	CG43980	2.69907	3.8618e-07
FBgn0052847	CG32847	2.69691	4.8996e-05
FBgn0036374	Spt20	2.6959	5.61401e-122
FBgn0036789	AstC-R2	2.69569	8.5376e-13
FBgn0043853	scaRNA:MeU5-C46	2.69269	7.45118e-08
FBgn0004583	ex	2.69189	5.14321e-54
FBgn0000320	eya	2.69144	2.85113e-18
FBgn0038295	Gyc88E	2.69133	0.000216707
FBgn0038542	TyrR	2.6906	0.00020632
FBgn0045063	fdl	2.68999	8.40048e-49
FBgn0003575	su(sable)	2.68872	4.18323e-107
FBgn0051697	CG31697	2.68667	6.73269e-05
FBgn0052227	gogo	2.68569	1.60403e-56
FBgn0035670	CG10472	2.68536	2.33648e-06
FBgn0034060	Tmem131	2.68473	1.25425e-68
FBgn0037736	side-VII	2.67984	1.79565e-10
FBgn0036186	CG6071	2.6776	1.26262e-35
FBgn0029688	lva	2.67713	1.88939e-115
FBgn0002306	sas	2.67412	3.84631e-21
FBgn0033113	Spn42Dc	2.67393	1.1003e-11
FBgn0013469	klu	2.67375	7.17958e-09
FBgn0043903	dome	2.67353	5.57803e-105
FBgn0028879	CG15270	2.67188	8.35523e-08
FBgn0040765	luna	2.67182	1.45047e-05
FBgn0262717	Skeletor	2.66942	2.63786e-09
FBgn0032879	CarT	2.66867	8.46808e-05
FBgn0001316	klar	2.66862	1.27557e-96
FBgn0003651	svp	2.66718	5.3958e-07
FBgn0250910	Octβ3R	2.66636	7.51065e-05
FBgn0015589	Apc	2.66595	3.02807e-86
FBgn0051004	mesh	2.66566	4.80211e-13
FBgn0031006	rictor	2.6642	7.82876e-152
FBgn0260486	Ziz	2.66198	5.75861e-96
FBgn0013272	Gp150	2.66127	7.7897e-31
FBgn0263290	lncRNA:CR43399	2.66059	1.67717e-09
FBgn0003089	pip	2.65954	0.000186997
FBgn0287724	Ca-β	2.65934	4.15587e-07
FBgn0030340	CG15740	2.6592	0.000414881
FBgn0262103	Sik3	2.65857	1.67966e-85
FBgn0266411	sima	2.65841	1.86105e-56
FBgn0035430	CG12009	2.65809	0.000149043
FBgn0264431	lncRNA:CR43849	2.65273	3.06405e-10
FBgn0010197	Gyc32E	2.6526	2.0276e-06
FBgn0040022	Set1	2.65156	3.04807e-56
FBgn0262109	lncRNA:CR42862	2.65047	8.95131e-63
FBgn0036544	sff	2.64838	4.07128e-08
FBgn0035142	Hipk	2.64834	1.4834e-93
FBgn0031869	CG18304	2.64784	6.20742e-17
FBgn0026616	α-Man-IIb	2.64532	1.23998e-42
FBgn0259110	mmd	2.64524	5.20388e-06
FBgn0086681	Mst36Fa	2.64375	2.13081e-16
FBgn0262897	lncRNA:CR43252	2.64331	9.20716e-08
FBgn0265929	lncRNA:CR44718	2.64291	1.4426e-10
FBgn0030613	Rab3-GEF	2.64241	9.53611e-12
FBgn0039039	lmd	2.64195	0.000168888
FBgn0021796	Tor	2.63937	5.02596e-164
FBgn0014368	nol	2.63641	0.000167265
FBgn0004118	nAChRβ2	2.63468	1.79587e-25
FBgn0261053	Cad86C	2.63403	5.80191e-05
FBgn0264006	dysc	2.63393	0.000307648
FBgn0039862	kek6	2.6332	1.5739e-59
FBgn0023541	Cyp4d14	2.6329	4.65159e-07
FBgn0033610	CG18335	2.63222	7.69383e-06
FBgn0085370	Pde11	2.63108	1.89894e-96
FBgn0031850	Tsp	2.62982	4.754e-08
FBgn0250867	CG42238	2.62828	5.16532e-58
FBgn0036882	CG9279	2.62524	8.57935e-73
FBgn0025626	CG4281	2.6241	1.2291e-98
FBgn0085446	CG34417	2.62385	5.43008e-22
FBgn0035078	Tpc2	2.62298	4.4201e-09
FBgn0032481	CG16972	2.62205	9.28223e-96
FBgn0003891	tud	2.62178	2.799e-74
FBgn0264953	Piezo	2.62127	1.16904e-92
FBgn0004368	Ptp4E	2.62044	1.39694e-125
FBgn0035713	velo	2.62005	2.86337e-158
FBgn0026313	X11L	2.61831	6.56761e-96
FBgn0261086	Syt14	2.61708	1.76315e-10
FBgn0000307	chif	2.61691	8.05732e-64
FBgn0038181	CG9297	2.61687	6.74713e-05
FBgn0267665	lncRNA:CR46003	2.61599	3.54235e-13
FBgn0030466	CG15744	2.61529	7.63428e-83
FBgn0000037	mAChR-A	2.6148	6.7983e-05
FBgn0004859	ci	2.61471	3.30936e-65
FBgn0004648	svr	2.61333	4.4674e-62
FBgn0050056	CG30056	2.61173	1.82869e-06
FBgn0287478	Camta	2.61052	6.81109e-98
FBgn0039154	Npc2f	2.60873	3.9902e-05
FBgn0036663	CG9674	2.60796	1.24944e-80
FBgn0027611	LManII	2.60775	5.52425e-29
FBgn0286785	scb	2.60765	2.49863e-26
FBgn0263747	CG43672	2.60417	2.37671e-55
FBgn0032208	Ufd4	2.60416	8.34331e-82
FBgn0038880	SIFaR	2.60353	0.000172842
FBgn0037146	P5CS	2.60125	0.000327153
FBgn0002643	mam	2.60062	6.76382e-45
FBgn0285879	disco-r	2.60002	3.14626e-05
FBgn0052815	CG32815	2.59978	2.34245e-23
FBgn0001234	lncRNA:Hsrω	2.59605	5.87307e-10
FBgn0039523	CG12885	2.59371	3.47125e-05
FBgn0040299	Myo28B1	2.59185	1.28376e-05
FBgn0263748	CG43673	2.5916	1.99625e-05
FBgn0039738	Mgat2	2.59051	1.49112e-17
FBgn0038725	CG6184	2.5895	0.000281564
FBgn0028539	Eato	2.58924	3.90414e-23
FBgn0052026	CG32026	2.58783	8.72656e-10
FBgn0026375	RhoGAPp190	2.58702	1.87028e-78
FBgn0259927	CG42450	2.58679	2.83316e-40
FBgn0032535	Ance-2	2.58514	3.17858e-09
FBgn0266696	Svil	2.58256	1.5209e-218
FBgn0286809	xmas	2.58177	1.31901e-42
FBgn0266083	ocm	2.57756	1.53174e-66
FBgn0033052	SCAP	2.57687	8.86382e-88
FBgn0004598	Fur2	2.57516	4.03304e-88
FBgn0027339	jim	2.57445	4.58304e-12
FBgn0023407	B4	2.57185	5.7419e-62
FBgn0261953	TfAP-2	2.57143	0.00062089
FBgn0002522	lab	2.5712	1.79183e-08
FBgn0034598	CG4266	2.57076	3.3264e-68
FBgn0036179	CG7368	2.5694	0.000434804
FBgn0032252	loh	2.56854	2.07516e-07
FBgn0036678	CG11905	2.56851	0.000351705
FBgn0086655	jing	2.5685	4.625e-64
FBgn0267488	Mcr	2.56806	5.25502e-59
FBgn0051161	CG31161	2.56665	3.03046e-05
FBgn0250786	Chd1	2.56641	2.26993e-224
FBgn0030343	ATP7	2.56544	2.85032e-98
FBgn0051244	CG31244	2.56508	6.04842e-06
FBgn0034327	CG14505	2.56382	1.93594e-06
FBgn0039647	jus	2.56355	5.3598e-06
FBgn0285963	CG46339	2.56355	5.3598e-06
FBgn0052479	Usp10	2.56354	3.14723e-87
FBgn0259677	CG42346	2.56132	1.991e-30
FBgn0005198	gig	2.55972	1.7056e-91
FBgn0038344	obe	2.55929	3.1059e-63
FBgn0052580	Muc14A	2.55923	1.46273e-09
FBgn0250788	β-Spec	2.55867	1.04398e-46
FBgn0000463	Dl	2.55821	1.71449e-30
FBgn0262872	milt	2.55801	1.24836e-107
FBgn0015269	Nf1	2.55763	2.80916e-151
FBgn0261444	CG3638	2.55557	1.16433e-58
FBgn0032120	CG33298	2.55536	5.76149e-74
FBgn0025633	spdi	2.55527	1.04512e-67
FBgn0004655	wapl	2.55448	1.31072e-82
FBgn0262867	Ptr	2.55402	8.54575e-55
FBgn0028509	CenG1A	2.55308	1.1172e-70
FBgn0011740	α-Man-IIa	2.55094	3.31782e-32
FBgn0052654	Sec16	2.54906	6.96002e-87
FBgn0020251	sfl	2.54889	5.57937e-70
FBgn0004168	5-HT1A	2.54675	7.91735e-07
FBgn0010225	Gel	2.54673	4.68411e-31
FBgn0259227	CG42327	2.54641	7.97436e-89
FBgn0259145	CG42260	2.54588	6.08295e-12
FBgn0016059	Sema1b	2.54519	5.45182e-28
FBgn0262870	axo	2.54491	0.000169108
FBgn0032853	CG10651	2.54305	0.000226132
FBgn0011829	Ret	2.54293	3.04813e-06
FBgn0023416	Ac3	2.54098	2.61823e-32
FBgn0038651	Epg5	2.54074	1.87345e-84
FBgn0083960	CG34124	2.5387	3.78505e-09
FBgn0004861	ph-p	2.5384	2.02756e-70
FBgn0023535	arg	2.53824	1.83666e-05
FBgn0261549	rdgA	2.53753	1.11484e-110
FBgn0260794	ctrip	2.53739	6.87056e-73
FBgn0017590	klg	2.53554	4.52742e-11
FBgn0011592	fra	2.53342	2.042e-79
FBgn0001965	Sos	2.53266	3.36262e-131
FBgn0004367	mei-41	2.53143	1.87795e-65
FBgn0039290	CG13654	2.53059	0.00024952
FBgn0014033	Sr-CI	2.53056	0.000357949
FBgn0030661	Alp11	2.53029	2.98443e-05
FBgn0015380	drl	2.52965	3.29022e-26
FBgn0036287	CG10663	2.52887	1.91559e-21
FBgn0030809	Ubr1	2.52503	7.66897e-140
FBgn0087012	5-HT2A	2.52017	1.41282e-23
FBgn0024989	CG3777	2.51913	0.000541098
FBgn0033802	CG17724	2.51885	3.25339e-31
FBgn0033074	tomboy40	2.5131	2.9092e-09
FBgn0040297	Nhe2	2.50955	1.99311e-46
FBgn0264894	CG44085	2.50954	7.4371e-16
FBgn0263352	Unr	2.50902	3.5467e-63
FBgn0004370	Ptp10D	2.50777	6.12877e-96
FBgn0034076	Jhedup	2.5064	0.000907885
FBgn0035179	CG12038	2.50618	2.25562e-07
FBgn0053293	CG33293	2.50355	6.28411e-05
FBgn0085387	shakB	2.50321	5.21254e-06
FBgn0035439	CG14961	2.50129	0.000613099
FBgn0034618	CG9485	2.5002	7.36244e-82
FBgn0265901	asRNA:CR44690	2.49814	4.9083e-64
FBgn0034246	Dcr-2	2.49701	7.12868e-38
FBgn0001206	Hmr	2.49701	8.04711e-67
FBgn0037205	BoYb	2.49546	1.67281e-75
FBgn0040752	Prosap	2.49499	2.61417e-106
FBgn0004512	Mdr49	2.49401	1.9869e-87
FBgn0053531	Ddr	2.49254	0.000392314
FBgn0032629	beat-IIIc	2.49074	7.81901e-14
FBgn0040236	c11.1	2.49062	1.88032e-100
FBgn0261503	lncRNA:CR42651	2.48979	3.68457e-24
FBgn0029922	CG14431	2.48806	2.10064e-11
FBgn0035625	Blimp-1	2.48671	6.44481e-26
FBgn0003175	px	2.48311	1.02512e-71
FBgn0000567	Eip74EF	2.4786	0.000646802
FBgn0034716	Oatp58Dc	2.47813	1.04717e-06
FBgn0036043	Ae2	2.47599	3.22696e-70
FBgn0053017	CG33017	2.47558	0.000254616
FBgn0032456	MRP	2.47356	2.51578e-72
FBgn0250789	α-Spec	2.47307	7.07074e-37
FBgn0261873	sdt	2.47273	2.03316e-83
FBgn0265535	CG44385	2.47078	0.000117271
FBgn0031016	kek5	2.4691	7.08214e-53
FBgn0024179	wit	2.46872	1.71901e-17
FBgn0261793	Trf2	2.4646	2.0504e-165
FBgn0053207	pxb	2.46397	2.98261e-33
FBgn0036895	ms(3)76Cc	2.46203	2.79188e-09
FBgn0263289	scrib	2.46194	2.71534e-109
FBgn0038853	RhoGAP93B	2.4606	1.01898e-117
FBgn0037944	CG6923	2.46016	9.53579e-88
FBgn0035522	CG1273	2.45752	0.000479802
FBgn0032797	Hasp	2.45662	0.000752342
FBgn0032752	CG10702	2.45641	6.00404e-49
FBgn0264272	mwh	2.45617	1.09175e-07
FBgn0005386	ash1	2.45462	4.01184e-74
FBgn0000479	dnc	2.45372	6.04431e-67
FBgn0052113	Vps13D	2.45314	9.52003e-73
FBgn0019990	Gcn2	2.45169	4.5028e-233
FBgn0053003	CG33003	2.45155	0.000958365
FBgn0259211	grh	2.45141	5.6288e-42
FBgn0261383	IntS6	2.45035	2.3365e-148
FBgn0033901	O-fut1	2.44894	1.56008e-29
FBgn0261261	plx	2.4488	2.53137e-70
FBgn0029761	SK	2.44856	1.13989e-11
FBgn0001324	kto	2.44726	5.73744e-100
FBgn0005632	faf	2.4458	1.48983e-128
FBgn0250826	CG34160	2.44552	0.00067432
FBgn0011260	Sema2a	2.44322	7.72125e-11
FBgn0026439	Eaat1	2.44039	0.00023229
FBgn0038365	CG9593	2.44032	0.000501928
FBgn0265276	l(3)neo38	2.43966	6.26006e-29
FBgn0031170	Abca3	2.43917	9.07429e-49
FBgn0041092	tai	2.43873	3.14664e-87
FBgn0001296	kar	2.43711	6.89757e-13
FBgn0004880	scrt	2.43461	2.52372e-06
FBgn0038324	CG5038	2.43401	7.76729e-53
FBgn0032363	Dlg5	2.43395	9.99522e-68
FBgn0265778	PDZ-GEF	2.43378	3.29805e-87
FBgn0037751	topi	2.43332	4.30704e-08
FBgn0052396	βTub65B	2.432	3.52568e-07
FBgn0263934	esn	2.43063	0.000131548
FBgn0066101	LpR1	2.43033	2.15109e-66
FBgn0033696	Cyp6g2	2.4283	6.84603e-07
FBgn0261648	salm	2.42604	7.77985e-78
FBgn0265058	asRNA:CR44169	2.4246	1.58646e-06
FBgn0266580	Gp210	2.42022	2.83619e-28
FBgn0050089	CG30089	2.41941	7.28768e-49
FBgn0030764	CG9777	2.41919	8.8076e-07
FBgn0033987	ckn	2.41789	2.15665e-66
FBgn0028704	Nckx30C	2.41742	8.46536e-05
FBgn0027795	CG14785	2.41648	1.16419e-14
FBgn0037712	CG16789	2.41622	1.54035e-06
FBgn0024806	DIP2	2.41617	4.35974e-69
FBgn0267336	Glut4EF	2.41416	3.15377e-20
FBgn0264838	asRNA:CR44046	2.41403	9.38769e-07
FBgn0039704	neo	2.41244	0.00036668
FBgn0267408	AOX1	2.41225	2.05025e-124
FBgn0053182	Kdm4B	2.4072	4.78764e-104
FBgn0026575	hang	2.40702	2.67316e-138
FBgn0036913	Usp32	2.40531	3.30647e-80
FBgn0003475	spir	2.40514	7.02917e-150
FBgn0003016	osp	2.4033	1.69434e-94
FBgn0000014	abd-A	2.40317	1.13414e-13
FBgn0051451	lncRNA:CR31451	2.40312	0.000565521
FBgn0032467	Ube4B	2.40207	1.98729e-100
FBgn0263599	Brr2	2.39962	1.62629e-63
FBgn0023479	teq	2.39866	1.08834e-20
FBgn0263442	asRNA:CR43465	2.39819	0.000706558
FBgn0034540	Lrt	2.39812	7.41139e-22
FBgn0266801	CG45263	2.39559	5.31709e-22
FBgn0036463	Reck	2.39493	1.71573e-18
FBgn0039623	CG1951	2.39394	4.51727e-36
FBgn0010300	brat	2.39166	6.92194e-131
FBgn0267667	asRNA:CR46005	2.39157	0.000199776
FBgn0053556	form3	2.38875	9.79756e-08
FBgn0014135	bnl	2.38808	1.0394e-11
FBgn0034606	ASPP	2.38793	8.18968e-60
FBgn0260742	CG12213	2.38506	2.40638e-09
FBgn0037240	Cont	2.38495	3.76124e-28
FBgn0003520	stau	2.38458	2.62066e-98
FBgn0037546	mAChR-B	2.38379	3.50678e-07
FBgn0000180	bib	2.38365	4.62752e-47
FBgn0035954	Doc3	2.38348	3.45958e-34
FBgn0264695	Mhc	2.38334	3.54327e-06
FBgn0004373	fwd	2.38293	2.0885e-105
FBgn0014141	cher	2.38207	5.94867e-53
FBgn0036746	Crtc	2.3812	1.79446e-65
FBgn0020621	Pkn	2.38028	7.00052e-89
FBgn0021761	Nup154	2.37978	4.57354e-53
FBgn0020617	Rx	2.37793	1.79904e-06
FBgn0051224	CG31224	2.37696	2.743e-84
FBgn0029873	CG3918	2.37665	9.5845e-32
FBgn0010434	cora	2.37519	4.52148e-42
FBgn0051719	RluA-1	2.37273	3.67622e-07
FBgn0039466	CG5521	2.3715	1.81636e-78
FBgn0028999	nerfin-1	2.37046	0.000264115
FBgn0033913	CG8468	2.37017	1.15696e-06
FBgn0052218	lncRNA:CR32218	2.36968	4.65263e-74
FBgn0003308	ry	2.3682	2.14785e-50
FBgn0264324	spg	2.36792	2.6277e-98
FBgn0030796	CG4829	2.36748	4.63273e-06
FBgn0039501	TTLL6B	2.36745	2.53201e-25
FBgn0035676	ssp6	2.36725	2.22889e-07
FBgn0015625	CycB3	2.3663	7.88856e-88
FBgn0002932	neur	2.36602	2.49382e-65
FBgn0000140	asp	2.36595	4.347e-138
FBgn0001138	grn	2.36537	4.0938e-20
FBgn0020294	ko	2.36515	3.74932e-14
FBgn0051973	Cda5	2.36451	1.07569e-15
FBgn0263456	nwk	2.3644	0.0003956
FBgn0037918	CG6791	2.36314	1.1054e-114
FBgn0020279	lig	2.36216	1.63379e-76
FBgn0005775	Con	2.35997	1.19379e-07
FBgn0000015	Abd-B	2.35986	5.22402e-11
FBgn0015477	Rme-8	2.3598	7.68362e-102
FBgn0003339	Scr	2.35951	1.18264e-10
FBgn0024366	CG11409	2.35925	2.04499e-24
FBgn0020257	Ppa	2.35902	4.56697e-32
FBgn0000247	ca	2.35806	2.23924e-143
FBgn0262473	Tl	2.35776	5.9149e-23
FBgn0264489	CG43897	2.35489	2.98149e-05
FBgn0054056	CG34056	2.35424	9.99951e-05
FBgn0026563	CG1979	2.35073	5.34915e-05
FBgn0041605	cpx	2.34984	4.3757e-17
FBgn0037116	Als2	2.34569	8.19405e-175
FBgn0052141	saturn	2.34429	7.17453e-08
FBgn0031258	CG4297	2.34426	5.26353e-14
FBgn0052506	tbc	2.34388	0.000361343
FBgn0030366	Usp7	2.34221	5.30306e-94
FBgn0261698	SLO2	2.34215	9.1467e-76
FBgn0052982	CG32982	2.34113	6.22722e-97
FBgn0288469	Pex23	2.33763	6.00425e-55
FBgn0261554	CG42672	2.337	5.74218e-70
FBgn0000166	bcd	2.33681	5.43912e-21
FBgn0259228	C3G	2.33678	7.19116e-113
FBgn0031872	ihog	2.3363	5.89949e-33
FBgn0263048	Gpdh3	2.33544	6.76455e-142
FBgn0039101	CG16710	2.33538	1.35542e-09
FBgn0033246	ACC	2.33495	5.15865e-77
FBgn0259111	Ndae1	2.33367	2.01462e-23
FBgn0003656	sws	2.33318	2.21717e-87
FBgn0025525	bab2	2.33306	8.12759e-07
FBgn0033072	CG17994	2.3328	1.56127e-05
FBgn0025802	Sbf	2.33107	1.91695e-82
FBgn0050187	CG30187	2.33096	1.58623e-05
FBgn0000163	baz	2.32983	4.53825e-90
FBgn0284084	wg	2.3282	4.04908e-32
FBgn0039064	CG4467	2.32741	1.71207e-05
FBgn0052669	CG32669	2.32643	1.96952e-14
FBgn0053144	CG33144	2.32643	1.35902e-114
FBgn0029962	CARPA	2.32616	0.000359531
FBgn0052365	CG32365	2.32557	4.97711e-23
FBgn0020379	Rfx	2.32452	4.99187e-99
FBgn0016070	smg	2.32447	5.4335e-90
FBgn0003464	sol	2.32416	7.99276e-109
FBgn0267104	CG45544	2.32379	2.15068e-22
FBgn0000317	ck	2.32354	3.0497e-66
FBgn0040271	Sulf1	2.3225	3.06863e-28
FBgn0038598	CG7131	2.32163	6.02901e-08
FBgn0024250	brk	2.32137	5.37216e-49
FBgn0010303	hep	2.32113	3.99358e-123
FBgn0020299	stumps	2.32002	2.94917e-55
FBgn0034570	CG10543	2.31905	2.69915e-70
FBgn0019968	Khc-73	2.31864	7.43895e-121
FBgn0010194	Wnt5	2.31853	5.93319e-38
FBgn0033652	ths	2.3184	2.33687e-36
FBgn0032405	firl	2.31763	0.00022956
FBgn0032593	Trpγ	2.31748	2.11331e-06
FBgn0052533	CG32533	2.31742	2.23731e-71
FBgn0014037	Su(Tpl)	2.31731	3.06773e-164
FBgn0014075	Uggt	2.31724	2.47018e-31
FBgn0035710	SP1173	2.31662	0.000201923
FBgn0016756	Usp47	2.31611	2.93814e-43
FBgn0261556	CG42674	2.31598	8.92375e-91
FBgn0035101	p130CAS	2.31594	5.15823e-14
FBgn0050047	CG30047	2.31575	7.59327e-08
FBgn0263111	cac	2.31558	1.78208e-68
FBgn0026189	promL	2.3153	1.25543e-23
FBgn0038113	CG11668	2.3148	9.35018e-05
FBgn0003091	Pkc53E	2.31402	1.26582e-06
FBgn0038755	Hs6st	2.31385	1.98961e-24
FBgn0051729	CG31729	2.31363	7.04352e-45
FBgn0028331	l(1)G0289	2.31313	5.63249e-24
FBgn0023001	melt	2.31265	1.32528e-36
FBgn0261349	Mst36Fb	2.30967	1.14234e-07
FBgn0034975	enok	2.30934	1.57382e-77
FBgn0262527	nsl1	2.30931	1.11879e-97
FBgn0037831	Cap-H2	2.30857	1.05535e-105
FBgn0034641	mahj	2.30288	4.43053e-154
FBgn0034493	CG8908	2.30255	7.00511e-15
FBgn0263220	Hk	2.30141	1.57563e-07
FBgn0029088	disp	2.30137	4.33324e-32
FBgn0259878	Fs	2.30107	1.95151e-06
FBgn0262730	dtn	2.30062	9.10673e-43
FBgn0266053	Patr-1	2.30055	1.00496e-45
FBgn0035162	Sf3b3	2.30041	2.68803e-117
FBgn0028956	mthl3	2.29988	9.14222e-09
FBgn0041337	Cyp309a2	2.29973	0.000197379
FBgn0035264	Oseg4	2.29556	1.94537e-15
FBgn0037254	sac	2.29537	7.39083e-11
FBgn0042085	Bap170	2.2949	2.54975e-111
FBgn0051157	CG31157	2.29464	0.000365821
FBgn0024913	Actβ	2.29443	0.000625621
FBgn0030941	wgn	2.2939	7.50545e-11
FBgn0037093	Cdk12	2.29375	8.43796e-74
FBgn0034300	CG5098	2.29314	1.51978e-124
FBgn0266681	asRNA:CR45171	2.29298	9.24406e-31
FBgn0020912	Ptx1	2.29294	7.05887e-07
FBgn0031051	Ranbp21	2.29035	2.74045e-115
FBgn0037541	CG2747	2.28856	1.90229e-104
FBgn0040011	Slmap	2.2881	1.05854e-30
FBgn0002873	mud	2.2878	1.49117e-115
FBgn0002945	nkd	2.28777	7.88061e-47
FBgn0035021	CG4622	2.28666	3.88756e-96
FBgn0261954	east	2.28603	6.87857e-69
FBgn0030344	Nrd1	2.2859	2.43137e-44
FBgn0001301	kel	2.28489	7.55982e-13
FBgn0034797	nahoda	2.2818	7.48093e-15
FBgn0034009	CG8155	2.28124	7.63566e-112
FBgn0036474	Or71a	2.28081	1.90317e-09
FBgn0053513	Nmdar2	2.28029	0.000309253
FBgn0004650	fs(1)N	2.27921	1.04603e-93
FBgn0020546	lncRNA:iab4	2.27654	5.16009e-39
FBgn0000721	for	2.27653	2.31194e-152
FBgn0083969	CG34133	2.27566	9.49795e-72
FBgn0040697	Teh3	2.27524	2.89526e-05
FBgn0265182	CG44247	2.275	1.77071e-23
FBgn0001169	H	2.27427	4.74557e-54
FBgn0261799	dsx-c73A	2.27294	8.00238e-08
FBgn0016797	fz2	2.27271	3.00695e-60
FBgn0038621	CG10864	2.27078	3.34641e-10
FBgn0032590	CG4631	2.27008	0.000190719
FBgn0004575	Syn	2.27001	0.000378821
FBgn0015399	kek1	2.26682	3.3597e-15
FBgn0039431	plum	2.26623	5.07452e-45
FBgn0259791	bora	2.2618	2.9726e-45
FBgn0053978	CG33978	2.26153	3.89657e-09
FBgn0265060	lncRNA:CR44171	2.26002	0.000124536
FBgn0003416	sl	2.25834	1.74849e-88
FBgn0037327	PEK	2.25648	3.0731e-68
FBgn0034720	Liprin-γ	2.25483	5.97965e-38
FBgn0026401	Nipped-B	2.25313	3.94533e-29
FBgn0085376	CG34347	2.25296	2.90552e-17
FBgn0000625	eyg	2.25286	6.02305e-05
FBgn0011202	dia	2.25157	4.63795e-113
FBgn0085437	CG34408	2.2514	1.18372e-62
FBgn0002891	PolZ1	2.25068	9.84055e-60
FBgn0034391	CG15080	2.25049	8.59381e-05
FBgn0051660	smog	2.24855	3.10673e-07
FBgn0023511	Edem1	2.24826	6.60084e-48
FBgn0264975	Nrg	2.24816	1.06004e-45
FBgn0267037	asRNA:CR45481	2.24703	1.43786e-33
FBgn0025186	ari-2	2.24648	2.4053e-225
FBgn0264305	CG43783	2.24602	1.00758e-85
FBgn0004387	Klp98A	2.24405	1.7114e-138
FBgn0033155	Br140	2.2434	1.8336e-148
FBgn0035699	CG13300	2.23929	0.000337886
FBgn0040372	G9a	2.23643	5.75974e-92
FBgn0035505	Teh2	2.23634	2.19414e-12
FBgn0025740	PlexB	2.23497	1.04281e-09
FBgn0022800	Cad96Ca	2.23391	2.53857e-05
FBgn0004657	mys	2.23342	1.8044e-23
FBgn0039776	PH4αEFB	2.23341	5.74067e-07
FBgn0001235	hth	2.23263	1.85862e-46
FBgn0036534	DCP2	2.23231	6.95348e-67
FBgn0026206	mei-P26	2.23093	4.09173e-86
FBgn0037363	Atg17	2.23064	3.0584e-155
FBgn0000052	Pfas	2.22962	2.32024e-138
FBgn0030592	CG9514	2.2296	0.000901008
FBgn0052547	CG32547	2.2287	0.000121288
FBgn0044028	Notum	2.22657	1.61226e-13
FBgn0036714	CG7692	2.22643	5.64397e-88
FBgn0010052	Jhe	2.22536	1.38799e-09
FBgn0046704	Liprin-α	2.22527	3.82136e-63
FBgn0035091	CG3829	2.22315	8.76499e-06
FBgn0010452	trn	2.22229	1.39295e-35
FBgn0036732	Oatp74D	2.22128	4.90787e-13
FBgn0041604	dlp	2.21896	2.64895e-51
FBgn0033766	Nup188	2.21668	3.60108e-62
FBgn0027596	Kank	2.21645	2.43031e-44
FBgn0260499	qvr	2.21619	0.000309405
FBgn0028979	tio	2.21596	8.21575e-11
FBgn0039282	Bili	2.2152	2.40066e-08
FBgn0022787	Hel89B	2.21471	1.64537e-116
FBgn0039167	CG17786	2.21399	2.04205e-24
FBgn0004244	Rdl	2.21317	0.000127375
FBgn0010355	Taf1	2.21195	1.97195e-103
FBgn0286204	ich	2.21178	9.10245e-34
FBgn0025390	Mur2B	2.21106	2.78654e-09
FBgn0004102	oc	2.20951	1.4153e-21
FBgn0003984	vn	2.20836	4.07063e-34
FBgn0016122	Acer	2.20459	1.21064e-15
FBgn0002441	l(3)mbt	2.20307	2.95269e-129
FBgn0283712	LIMK1	2.20284	8.89058e-113
FBgn0034049	bdg	2.20279	1.0627e-76
FBgn0025741	PlexA	2.20107	5.92947e-26
FBgn0035696	Best2	2.20042	1.96418e-05
FBgn0259707	CG42361	2.19986	1.59975e-07
FBgn0283657	Tlk	2.19964	5.4076e-78
FBgn0015600	toc	2.19872	2.3112e-101
FBgn0033061	SmydA-5	2.19644	2.6721e-08
FBgn0026869	Tdg	2.1963	3.49874e-64
FBgn0051457	CG31457	2.19437	1.74651e-45
FBgn0000319	Chc	2.19274	4.09764e-85
FBgn0260789	mxc	2.19069	5.57156e-189
FBgn0085450	Snoo	2.18975	1.63584e-59
FBgn0022768	Pp2C1	2.18892	2.49063e-75
FBgn0261552	ps	2.18868	1.03935e-06
FBgn0030812	wcy	2.18806	3.37507e-138
FBgn0034590	Magi	2.18624	6.17577e-82
FBgn0035802	Pura	2.18428	8.09727e-57
FBgn0261610	CG42699	2.18402	1.24996e-59
FBgn0030974	Flacc	2.18051	6.32629e-92
FBgn0036862	Gbs-76A	2.17689	5.61322e-11
FBgn0010453	Wnt4	2.17557	5.4137e-06
FBgn0051721	Trim9	2.17519	1.08924e-40
FBgn0036668	Zcchc7	2.17471	5.99702e-120
FBgn0039916	Ekar	2.17439	0.000855541
FBgn0029945	Acsf3	2.17196	2.71124e-07
FBgn0004860	ph-d	2.17069	1.46835e-72
FBgn0010395	Itgbn	2.17041	6.83103e-19
FBgn0039234	Nct	2.17034	5.26463e-20
FBgn0086680	vvl	2.16859	0.000675884
FBgn0003483	spn-E	2.16856	4.03693e-73
FBgn0004666	sim	2.16586	2.57175e-24
FBgn0032083	CG9541	2.16486	0.000790057
FBgn0025709	CNT2	2.16082	6.87644e-05
FBgn0004390	RasGAP1	2.16013	5.84669e-92
FBgn0259745	wech	2.15993	2.43132e-53
FBgn0037249	eIF3a	2.15794	1.80256e-91
FBgn0026577	CG8677	2.1571	5.74239e-24
FBgn0265487	mbl	2.15679	1.55623e-08
FBgn0050357	CG30357	2.1563	1.55183e-08
FBgn0000658	fj	2.15038	2.18902e-08
FBgn0034880	ItgaPS5	2.1493	0.000190104
FBgn0037992	CG4702	2.14921	4.61966e-09
FBgn0037753	CG12947	2.14893	3.9076e-22
FBgn0034786	CG13531	2.14778	6.2608e-65
FBgn0000541	E(bx)	2.14767	4.39339e-77
FBgn0036612	CG4998	2.14473	3.70279e-10
FBgn0259986	nab	2.13663	3.66689e-05
FBgn0262475	bru2	2.13592	2.81971e-05
FBgn0036814	CG14073	2.1347	1.61814e-109
FBgn0052296	Mrtf	2.13323	6.97506e-89
FBgn0030089	AP-1γ	2.1326	5.82714e-91
FBgn0026181	Rok	2.12692	3.41753e-157
FBgn0260655	l(3)76BDm	2.12626	1.27437e-99
FBgn0014388	sty	2.12559	1.13225e-14
FBgn0038320	Cyfip	2.1236	5.68454e-85
FBgn0032253	LManI	2.1234	9.77948e-05
FBgn0003896	tup	2.1223	5.29318e-30
FBgn0003210	rb	2.12024	3.76832e-184
FBgn0004644	hh	2.11953	1.14716e-14
FBgn0031959	spz3	2.11936	1.96284e-09
FBgn0033688	Prp8	2.11616	1.75225e-96
FBgn0050372	Asap	2.11605	6.78535e-133
FBgn0003719	tld	2.11412	1.77357e-31
FBgn0263256	CG43394	2.11328	5.58925e-26
FBgn0264561	Glg1	2.11125	9.16965e-55
FBgn0050085	Rif1	2.11062	1.60161e-152
FBgn0034742	CG4294	2.11045	2.43385e-58
FBgn0261244	inaE	2.11006	2.4486e-78
FBgn0263236	SP1029	2.10841	3.64745e-15
FBgn0029504	CHES-1-like	2.10831	6.92029e-61
FBgn0261930	vnd	2.10801	1.65441e-29
FBgn0026411	Lim1	2.10664	1.38367e-08
FBgn0034733	CG4752	2.10301	1.69145e-121
FBgn0030365	Tango4	2.10207	2.14919e-28
FBgn0085426	Rgk3	2.10108	0.000129726
FBgn0030716	CG9170	2.10106	8.78268e-31
FBgn0287873	zip	2.10087	1.30919e-52
FBgn0033649	pyr	2.10056	3.90329e-14
FBgn0023508	Ocrl	2.09977	4.18132e-80
FBgn0045035	tefu	2.09894	2.29168e-87
FBgn0085384	CG34355	2.09887	1.2307e-05
FBgn0026432	Grip163	2.09671	4.09698e-144
FBgn0003654	sw	2.09628	5.63645e-26
FBgn0283531	Duox	2.09606	2.05984e-76
FBgn0264857	lncRNA:iab8	2.09436	2.03459e-18
FBgn0029903	pod1	2.09388	3.45934e-122
FBgn0263973	jv	2.09052	2.70941e-08
FBgn0083940	RhoU	2.08924	1.35193e-45
FBgn0039338	XNP	2.08725	4.40451e-95
FBgn0261618	larp	2.08493	2.37546e-67
FBgn0263706	CG43658	2.08388	9.95461e-76
FBgn0033212	LRR	2.08378	6.88093e-187
FBgn0038499	Brf	2.08275	7.33263e-54
FBgn0261258	rgn	2.08176	1.53667e-22
FBgn0261963	mid	2.0815	7.997e-38
FBgn0262029	d	2.08081	7.12041e-20
FBgn0029175	sotv	2.08073	4.82201e-18
FBgn0029990	CG2233	2.08002	0.000338486
FBgn0027582	CG6230	2.07934	1.40557e-19
FBgn0005624	Psc	2.07888	2.51167e-57
FBgn0041582	tamo	2.07499	2.58022e-61
FBgn0029895	CG14441	2.07456	6.66303e-99
FBgn0037025	Spc105R	2.07455	4.13761e-110
FBgn0260748	CG5004	2.07191	2.02883e-103
FBgn0033889	CG6701	2.06981	6.79624e-113
FBgn0032796	cyst	2.06884	1.65822e-124
FBgn0035437	Strip	2.06831	5.60786e-227
FBgn0020377	Sr-CII	2.06788	1.57053e-12
FBgn0025725	αCOP	2.06767	4.72988e-221
FBgn0027376	rha	2.06552	2.64996e-07
FBgn0000490	dpp	2.06544	9.57493e-30
FBgn0265630	sno	2.06383	4.7587e-121
FBgn0033460	Sec24AB	2.0634	1.60333e-83
FBgn0026197	lncRNA:noe	2.06307	1.11867e-09
FBgn0003002	opa	2.06162	7.06679e-31
FBgn0003459	stwl	2.06021	2.5851e-76
FBgn0063385	snoRNA:Me28S-A3407a	2.05911	3.67159e-05
FBgn0013576	mtd	2.05895	5.55417e-76
FBgn0052451	SPoCk	2.0588	2.54764e-27
FBgn0035398	Cht7	2.0586	0.000964605
FBgn0264357	SNF4Aγ	2.05816	3.58025e-139
FBgn0002906	Blm	2.05806	5.65045e-58
FBgn0003312	sad	2.05798	1.83797e-11
FBgn0261787	brun	2.05756	4.33641e-34
FBgn0032018	CG7806	2.05755	2.08984e-44
FBgn0041150	hoe1	2.05665	1.23275e-52
FBgn0026428	HDAC6	2.05591	1.30349e-84
FBgn0046253	CG3502	2.05455	4.40281e-34
FBgn0010549	l(2)03659	2.05345	5.99933e-14
FBgn0260642	Antp	2.05315	1.60356e-32
FBgn0027948	msps	2.05191	2.21727e-54
FBgn0025639	Hmt4-20	2.05163	1.55574e-181
FBgn0261984	Ire1	2.05051	1.4376e-41
FBgn0051469	Argp	2.0487	0.000126724
FBgn0010488	NAT1	2.0487	1.8643e-72
FBgn0036931	CG14183	2.04841	6.35336e-11
FBgn0284221	Sema5c	2.04827	9.3588e-35
FBgn0026061	Mipp1	2.04765	1.24311e-10
FBgn0028538	Sec71	2.04537	4.39768e-89
FBgn0052251	Claspin	2.04488	1.05154e-67
FBgn0032156	CG13124	2.04393	7.9039e-11
FBgn0004108	Nrt	2.04332	6.70929e-45
FBgn0005616	msl-2	2.04228	8.87616e-33
FBgn0036150	Ir68a	2.04126	1.67042e-16
FBgn0263395	hppy	2.03989	1.36872e-57
FBgn0042207	CG18530	2.03955	1.83244e-08
FBgn0026317	Tsc1	2.03934	9.81793e-16
FBgn0025936	Eph	2.03925	9.28881e-15
FBgn0014007	Ptp69D	2.03851	8.86914e-16
FBgn0041171	ago	2.03725	3.64493e-73
FBgn0035956	Doc2	2.03673	2.37032e-19
FBgn0263316	Mrp4	2.03515	3.73623e-19
FBgn0039207	Cftr	2.03511	4.68946e-38
FBgn0086711	mol	2.03462	8.95552e-14
FBgn0001987	Gli	2.03168	5.37035e-27
FBgn0010909	msn	2.03148	2.93802e-122
FBgn0003292	rt	2.03006	5.41501e-58
FBgn0015360	oxt	2.02876	2.41979e-47
FBgn0085443	spri	2.02383	1.00672e-49
FBgn0085438	CG34409	2.02366	7.34621e-06
FBgn0010258	Rbp4	2.02247	8.86814e-06
FBgn0283479	Alp1	2.02198	0.000256337
FBgn0087007	bbg	2.02127	5.85167e-22
FBgn0004396	CrebA	2.02081	1.69447e-10
FBgn0026239	gukh	2.02042	1.09238e-84
FBgn0041184	Socs36E	2.02035	4.76352e-37
FBgn0002673	twe	2.02032	7.35629e-34
FBgn0034073	CG8414	2.01961	1.77379e-33
FBgn0041156	exex	2.01924	4.36846e-05
FBgn0023510	Rbcn-3B	2.01877	6.16939e-85
FBgn0065051	scaRNA:MeU5-U42	2.01852	0.000658085
FBgn0026620	tacc	2.01711	4.51003e-56
FBgn0265274	Inx3	2.01479	1.18823e-18
FBgn0015279	Pi3K92E	2.01388	7.6641e-108
FBgn0037530	EMC1	2.01357	5.35945e-33
FBgn0035793	CG7546	2.01325	5.60699e-84
FBgn0029123	SoxN	2.01227	7.12909e-37
FBgn0004919	gol	2.01194	0.000546602
FBgn0028562	sut2	2.01184	0.000211417
FBgn0030512	Nadsyn	2.01158	2.7124e-115
FBgn0021776	mira	2.01072	4.99368e-58
FBgn0250824	CG33655	2.00915	9.12152e-05
FBgn0025631	moody	2.00738	3.99708e-07
FBgn0000723	FER	2.00711	9.71106e-25
FBgn0267571	lncRNA:CR45911	2.00659	1.30315e-16
FBgn0011710	Septin1	2.0045	2.13317e-70
FBgn0031878	sip2	2.00426	1.94992e-36
FBgn0004611	Plc21C	2.00311	3.67112e-40
FBgn0263772	CG43689	2.00246	5.94404e-35
FBgn0259214	PMCA	2.00091	4.12553e-15
FBgn0031196	Cluap1	1.99962	0.000542476
FBgn0026713	Prp16	1.99962	7.48165e-60
FBgn0020378	Sp1	1.99807	0.000453809
FBgn0030286	Gapvd1	1.99745	1.99812e-105
FBgn0034095	CG15701	1.9972	2.79127e-18
FBgn0039863	CG1815	1.9971	7.35689e-44
FBgn0037717	CG8301	1.99381	1.09131e-77
FBgn0033479	PIG-N	1.99338	1.79659e-18
FBgn0052791	DIP-α	1.99189	2.89806e-27
FBgn0260386	mtg	1.98771	0.000414826
FBgn0004646	ogre	1.98512	2.12051e-19
FBgn0029826	CG6041	1.98499	0.000108353
FBgn0283451	br	1.98285	1.05604e-07
FBgn0027588	GCS2α	1.98223	4.23387e-17
FBgn0053111	CG33111	1.98207	5.08142e-51
FBgn0261550	Orp8	1.982	2.17074e-141
FBgn0051352	Unc-115a	1.98173	5.62566e-09
FBgn0034072	Dg	1.98092	1.02493e-56
FBgn0035842	Setx	1.98016	6.11293e-75
FBgn0035983	CG4080	1.97765	6.41649e-44
FBgn0026376	Rgl	1.97673	3.00036e-81
FBgn0024329	Mekk1	1.97467	2.60005e-72
FBgn0267072	lncRNA:CR45516	1.97399	8.20588e-10
FBgn0001319	kn	1.97358	1.80991e-08
FBgn0051849	Mgat3	1.9706	4.93375e-45
FBgn0040233	cana	1.97025	7.53159e-145
FBgn0260634	eIF4G2	1.96907	2.88883e-75
FBgn0262739	AGO1	1.96569	1.30825e-90
FBgn0260481	CG32454	1.96545	0.000351705
FBgn0003254	rib	1.96433	1.21054e-07
FBgn0030642	CG15642	1.96328	1.2708e-11
FBgn0038223	Afti	1.96135	2.31616e-75
FBgn0259818	CG42399	1.96044	5.11176e-47
FBgn0038237	Pde6	1.95938	4.73871e-05
FBgn0085425	CG34396	1.95688	4.0548e-05
FBgn0029763	Usp16-45	1.9568	2.91097e-68
FBgn0051414	Gba1b	1.95605	1.04516e-05
FBgn0004875	enc	1.9554	9.8078e-76
FBgn0037897	CG5270	1.95429	1.28869e-80
FBgn0085432	pan	1.95268	5.10876e-47
FBgn0031257	CG4133	1.95172	6.15636e-08
FBgn0031538	CG3246	1.95125	1.1251e-06
FBgn0030946	CG6659	1.95124	1.32051e-34
FBgn0020386	Pdk1	1.9509	1.22766e-77
FBgn0037142	CG14562	1.94972	2.47506e-41
FBgn0002466	sti	1.94836	5.52947e-107
FBgn0052082	IRSp53	1.94713	1.3245e-06
FBgn0029750	CG3323	1.94442	6.46416e-18
FBgn0032079	CG31886	1.94335	4.32856e-35
FBgn0028899	CG31817	1.94187	7.98574e-05
FBgn0000382	csw	1.94057	1.35504e-60
FBgn0264950	asRNA:CR44119	1.94044	3.51016e-12
FBgn0261547	Exn	1.93943	7.02608e-71
FBgn0028500	Rich	1.93862	2.3693e-104
FBgn0024555	flfl	1.9377	1.5021e-48
FBgn0020391	Nrk	1.93487	1.2023e-06
FBgn0261647	Axud1	1.93471	1.48968e-90
FBgn0011576	Cyp4d2	1.93461	3.069e-09
FBgn0026262	Taf3	1.9342	3.14445e-45
FBgn0035267	CG13921	1.93259	3.10752e-52
FBgn0030049	Trf4-1	1.93124	1.43557e-162
FBgn0037074	Tbc1d8-9	1.93062	5.70568e-62
FBgn0260746	Ect3	1.93019	2.21599e-05
FBgn0029997	CG2258	1.92956	1.99641e-69
FBgn0020261	pcm	1.92899	2.85408e-68
FBgn0000459	disco	1.92892	2.32588e-09
FBgn0001269	inv	1.92877	7.93437e-05
FBgn0004864	hop	1.92842	4.53679e-119
FBgn0264895	RapGAP1	1.92723	1.27347e-102
FBgn0011259	Sema1a	1.92343	9.02302e-48
FBgn0001983	wor	1.92296	0.000517053
FBgn0037716	Son	1.92183	1.42092e-101
FBgn0260400	elav	1.92174	2.8584e-11
FBgn0051755	SoYb	1.92098	2.30722e-130
FBgn0020647	KrT95D	1.9202	4.62988e-75
FBgn0259166	CG42271	1.91994	3.5797e-103
FBgn0003944	Ubx	1.91884	5.90467e-13
FBgn0029157	ssh	1.91861	4.23438e-79
FBgn0004397	Vinc	1.91758	2.41709e-93
FBgn0030077	CG15365	1.91683	0.000640526
FBgn0259173	corn	1.91626	9.31709e-69
FBgn0038478	cal1	1.91539	1.46801e-68
FBgn0051635	CG31635	1.91341	1.6959e-50
FBgn0261532	cdm	1.91034	2.62892e-67
FBgn0003866	tsh	1.91016	6.68196e-37
FBgn0031266	Sf3b1	1.9094	4.75571e-17
FBgn0037379	CG10979	1.90938	3.37568e-75
FBgn0086444	l(2)37Cb	1.90796	3.80783e-70
FBgn0086671	snoRNA:Ψ28S-2876	1.90348	1.31213e-09
FBgn0038504	Sur-8	1.90282	6.36688e-118
FBgn0260935	Vps15	1.90251	4.96232e-109
FBgn0266418	wake	1.9007	3.5751e-69
FBgn0260945	Atg1	1.90044	1.892e-118
FBgn0052053	CG32053	1.89924	7.20043e-07
FBgn0263855	BubR1	1.89871	1.21043e-44
FBgn0013953	Esp	1.89844	7.57637e-05
FBgn0003041	pbl	1.89814	3.87044e-101
FBgn0005586	Rab3	1.89669	2.71345e-06
FBgn0032517	CG7099	1.89605	6.21018e-28
FBgn0286567	gry	1.8958	2.24423e-76
FBgn0265140	Meltrin	1.89414	4.7373e-56
FBgn0001087	g	1.89411	1.09796e-234
FBgn0034795	MED23	1.89243	2.81104e-135
FBgn0010926	l(3)07882	1.89221	5.8192e-54
FBgn0037218	aux	1.89073	3.56797e-114
FBgn0037000	ZnT77C	1.89061	6.98485e-22
FBgn0043854	slam	1.88968	1.17721e-22
FBgn0267002	unc-104	1.88855	2.54795e-56
FBgn0034602	Lapsyn	1.8873	7.12173e-08
FBgn0039004	Nup133	1.88715	8.0004e-39
FBgn0036032	CG16711	1.88699	3.26232e-74
FBgn0260941	app	1.88645	3.89024e-29
FBgn0031030	Tao	1.88533	4.92541e-154
FBgn0286198	LKRSDH	1.88527	2.24299e-08
FBgn0050263	stum	1.88442	0.000328087
FBgn0052698	CARPB	1.88239	8.83738e-24
FBgn0004581	bgcn	1.88177	2.30967e-07
FBgn0030701	CG16952	1.87995	5.72729e-56
FBgn0032123	Oatp30B	1.87981	2.87442e-35
FBgn0025627	CG4194	1.8785	1.75675e-09
FBgn0264863	asRNA:CR44054	1.87571	0.000435868
FBgn0039654	Brd8	1.87467	9.83931e-95
FBgn0002577	m	1.87326	1.5379e-06
FBgn0014859	Hr38	1.87316	0.000939196
FBgn0035848	Uxs	1.87271	3.2704e-21
FBgn0015558	tty	1.87092	1.75487e-33
FBgn0019650	toy	1.87085	6.35337e-18
FBgn0262955	Polr2B	1.87018	8.00181e-69
FBgn0014343	mirr	1.86945	7.04364e-12
FBgn0000117	arm	1.86892	1.00071e-96
FBgn0039240	CG3744	1.86701	1.42856e-59
FBgn0035231	Pcyt2	1.86246	1.18067e-09
FBgn0259170	α-Man-Ia	1.86161	7.15721e-23
FBgn0034085	Ptp52F	1.86123	0.000884776
FBgn0000053	Gart	1.86089	3.48465e-58
FBgn0027287	Gmap	1.86068	5.38533e-110
FBgn0039157	Myo95E	1.86066	4.30725e-51
FBgn0038968	CG12499	1.85906	1.64225e-70
FBgn0028476	Usp1	1.85891	3.4602e-42
FBgn0023095	caps	1.85604	1.11424e-13
FBgn0083962	CG34126	1.85461	1.39186e-92
FBgn0020370	TppII	1.85315	1.49584e-46
FBgn0031420	Atxn7	1.85259	3.28671e-89
FBgn0260934	par-1	1.84704	8.43143e-65
FBgn0261269	conv	1.84461	1.73819e-25
FBgn0283472	S6k	1.84282	9.16156e-23
FBgn0037635	CG9837	1.84172	0.000245762
FBgn0263974	qin	1.83955	7.5741e-45
FBgn0039187	CG6454	1.83881	3.09669e-64
FBgn0039734	Tace	1.8367	2.58979e-14
FBgn0034251	ND-51L1	1.83603	7.10471e-09
FBgn0034021	CG8180	1.83482	1.57981e-21
FBgn0037683	CG18473	1.83344	0.000201923
FBgn0051793	CG31793	1.83323	4.39256e-50
FBgn0263933	ebi	1.83248	6.23645e-83
FBgn0031042	CG14221	1.83201	5.1992e-10
FBgn0031673	CG31650	1.83158	2.48996e-15
FBgn0259176	bun	1.83087	7.66425e-79
FBgn0039900	Syt7	1.82889	1.60369e-05
FBgn0030858	IntS2	1.82853	5.73779e-76
FBgn0034490	CG9864	1.82837	0.00015738
FBgn0051792	CG31792	1.82767	0.000612254
FBgn0032475	Sfmbt	1.82739	1.59522e-63
FBgn0036294	CG10654	1.82666	7.70219e-49
FBgn0037838	TTLL15	1.82657	7.63278e-10
FBgn0031799	Pez	1.82588	7.40124e-38
FBgn0261938	PolrMT	1.8239	2.26528e-76
FBgn0003525	stg	1.82236	7.72172e-66
FBgn0030808	RhoGAP15B	1.8214	2.42215e-81
FBgn0031275	GABA-B-R3	1.81921	7.46994e-07
FBgn0010435	emp	1.81533	6.67827e-05
FBgn0037213	CG12581	1.81423	3.14257e-51
FBgn0263998	Ack-like	1.81306	1.25065e-124
FBgn0003486	spo	1.81204	1.54528e-11
FBgn0000416	Sap-r	1.807	6.01815e-12
FBgn0039923	MED26	1.80395	1.88395e-25
FBgn0010382	CycE	1.80326	1.22001e-163
FBgn0032800	CG10137	1.80301	7.36097e-11
FBgn0039668	Trc8	1.80218	4.82025e-67
FBgn0032480	Edem2	1.80216	2.14964e-64
FBgn0026060	Mipp2	1.80201	8.16141e-40
FBgn0004854	B-H2	1.80101	0.000407531
FBgn0261794	kcc	1.80095	3.14681e-24
FBgn0000008	a	1.80025	1.94221e-51
FBgn0067864	Patj	1.79994	1.45581e-67
FBgn0053797	CR33797	1.79972	0.00025103
FBgn0030869	Socs16D	1.79766	2.02642e-57
FBgn0036896	wnd	1.79284	3.79497e-63
FBgn0262733	Src64B	1.78872	1.02584e-60
FBgn0027548	nito	1.7883	2.1442e-95
FBgn0259168	mnb	1.78827	1.23464e-96
FBgn0051467	CG31467	1.78775	1.48924e-15
FBgn0051897	CG31897	1.78721	3.97252e-22
FBgn0265376	lncRNA:CR44317	1.78507	2.49015e-06
FBgn0036147	Plod	1.78337	8.74049e-15
FBgn0030893	RhoGAP16F	1.78161	9.10245e-17
FBgn0267485	asRNA:CR45835	1.78153	0.000214517
FBgn0085424	nub	1.78044	6.52808e-16
FBgn0034180	Ehbp1	1.77976	1.7717e-70
FBgn0038721	subdued	1.77963	2.17352e-63
FBgn0000546	EcR	1.77905	2.66517e-75
FBgn0040232	cmet	1.77877	2.30584e-80
FBgn0029114	Tollo	1.77864	1.23307e-73
FBgn0027532	CG7139	1.77758	1.85505e-111
FBgn0031023	CG14200	1.77752	5.76361e-66
FBgn0264005	Hmx	1.77739	5.70501e-05
FBgn0019938	Polr1A	1.77612	7.55974e-149
FBgn0053963	lncRNA:CR33963	1.77595	8.20273e-13
FBgn0014863	Mlp84B	1.77297	9.58901e-10
FBgn0030508	CG15760	1.77273	0.00065758
FBgn0037445	CG9727	1.77131	5.46406e-45
FBgn0010352	Ogdh	1.77114	2.4853e-20
FBgn0004956	upd1	1.76909	1.1623e-21
FBgn0259714	DIP-ε	1.76879	0.000103769
FBgn0260780	wisp	1.76643	5.84762e-96
FBgn0019952	Orct	1.76385	0.000436353
FBgn0003557	Su(dx)	1.76339	8.93963e-87
FBgn0261823	Asx	1.76328	1.43692e-88
FBgn0260943	Rbp6	1.76207	6.50674e-10
FBgn0027279	l(1)G0196	1.762	3.75941e-47
FBgn0000709	fliI	1.76199	3.24834e-43
FBgn0034225	veil	1.76155	9.38422e-10
FBgn0000212	brm	1.76046	2.78704e-29
FBgn0260005	wtrw	1.75929	5.02357e-15
FBgn0030243	CG2186	1.75927	3.13889e-89
FBgn0039056	CenB1A	1.75865	5.43771e-74
FBgn0031474	CG2991	1.75842	8.84782e-36
FBgn0005636	nvy	1.75841	2.53449e-07
FBgn0003997	hid	1.75827	2.1363e-10
FBgn0035094	CG9380	1.75778	1.03561e-09
FBgn0037573	CG7483	1.75751	5.88538e-56
FBgn0001180	hb	1.75596	1.24883e-50
FBgn0039896	yellow-h	1.75431	0.000426089
FBgn0050163	Cpr60D	1.7524	0.00058299
FBgn0032940	Mondo	1.75208	1.70758e-78
FBgn0000439	Dfd	1.7518	3.71354e-16
FBgn0086895	pea	1.7518	5.34705e-20
FBgn0020496	CtBP	1.74976	4.74506e-51
FBgn0000492	Dr	1.74971	7.37584e-08
FBgn0261429	lncRNA:CR42646	1.7489	3.89076e-05
FBgn0013751	Awh	1.74836	9.97084e-05
FBgn0021767	org-1	1.74675	0.000260175
FBgn0262647	Nup160	1.74611	8.92326e-63
FBgn0000719	fog	1.74401	4.89626e-34
FBgn0264598	PsGEF	1.74189	1.84087e-13
FBgn0264326	PolE1	1.73958	2.19658e-107
FBgn0261397	didum	1.73802	2.35414e-62
FBgn0031696	Bub1	1.73768	5.32647e-57
FBgn0027579	mino	1.73762	1.20479e-44
FBgn0002774	mle	1.73754	3.64127e-67
FBgn0039831	CG12054	1.73703	1.99321e-80
FBgn0027603	Ulp1	1.73601	7.43653e-70
FBgn0266111	ana3	1.73591	7.23327e-50
FBgn0036368	CG10738	1.73468	1.03268e-24
FBgn0003117	pnr	1.73372	7.70537e-17
FBgn0026083	tyf	1.7307	9.68144e-103
FBgn0011474	Set8	1.7305	7.78553e-99
FBgn0263929	jvl	1.73048	2.91612e-29
FBgn0024365	CG12773	1.72978	5.36686e-66
FBgn0261862	whd	1.72888	1.51999e-39
FBgn0005596	yem	1.72843	6.2985e-98
FBgn0034075	Asph	1.72782	4.54113e-15
FBgn0037130	Syn1	1.72742	2.96118e-06
FBgn0001078	ftz-f1	1.72674	2.82033e-39
FBgn0261545	CG42663	1.72659	3.64553e-10
FBgn0039928	Cals	1.72572	7.76971e-12
FBgn0039560	BOD1	1.72547	1.61155e-87
FBgn0036574	elg1	1.72403	2.46651e-82
FBgn0031490	CG17264	1.7204	0.000546602
FBgn0051158	Efa6	1.71831	2.26578e-65
FBgn0052813	CG32813	1.71669	6.83015e-08
FBgn0261811	pico	1.71632	6.08889e-66
FBgn0024698	Cpsf160	1.7158	1.71514e-58
FBgn0004959	phm	1.71574	1.67974e-13
FBgn0039069	CG6763	1.71469	1.24281e-07
FBgn0029685	CG2938	1.71423	1.47049e-24
FBgn0037949	prd1	1.71377	2.70415e-48
FBgn0028487	f-cup	1.71335	1.96439e-69
FBgn0023097	bon	1.70958	3.38785e-80
FBgn0263667	Lpt	1.70806	8.7196e-64
FBgn0265048	cv-d	1.70781	3.33827e-10
FBgn0259785	pzg	1.70744	5.0097e-63
FBgn0051915	CG31915	1.70704	1.91812e-42
FBgn0034271	Vps50	1.7067	1.76643e-87
FBgn0267978	ap	1.70434	5.04737e-06
FBgn0035766	eco	1.70364	4.04546e-48
FBgn0015919	caup	1.70329	0.000348868
FBgn0034491	Hsl	1.70281	5.79356e-52
FBgn0002878	mus101	1.70266	8.88685e-64
FBgn0037143	CR7448	1.70101	1.10763e-07
FBgn0010389	htl	1.69761	1.46851e-17
FBgn0030504	CG2691	1.69664	9.4437e-119
FBgn0259174	Nedd4	1.69417	3.36453e-41
FBgn0001330	kz	1.69387	3.8871e-136
FBgn0000568	Eip75B	1.69361	0.000129445
FBgn0024234	gbb	1.69315	1.03683e-06
FBgn0024187	syd	1.69248	1.29554e-57
FBgn0051195	CG31195	1.69224	1.17124e-18
FBgn0000928	fs(1)Yb	1.69219	1.88621e-05
FBgn0004369	Ptp99A	1.69177	9.18687e-38
FBgn0263776	CG43693	1.68954	0.000120041
FBgn0004406	PolG1	1.68901	1.18501e-51
FBgn0030930	Pgant7	1.68775	3.51738e-37
FBgn0036980	RhoBTB	1.68739	7.28088e-69
FBgn0032901	sky	1.68735	2.33887e-21
FBgn0040397	CG3655	1.6869	2.80974e-24
FBgn0026679	IntS4	1.68604	1.88926e-63
FBgn0005561	sv	1.68575	1.37083e-07
FBgn0032957	CG2225	1.68403	8.24483e-27
FBgn0260936	scny	1.68359	1.74068e-102
FBgn0033354	FANCI	1.68164	1.09959e-38
FBgn0034025	Pgant1	1.68064	3.56659e-65
FBgn0028491	CG2930	1.68034	7.61535e-12
FBgn0262081	Csk	1.67895	5.60782e-128
FBgn0263584	asRNA:CR43609	1.67682	2.50923e-08
FBgn0042696	NfI	1.67608	1.93523e-06
FBgn0266000	CG44774	1.67474	6.32982e-27
FBgn0004876	cdi	1.67241	2.33348e-92
FBgn0000157	Dll	1.67083	4.4673e-13
FBgn0267035	asRNA:CR45479	1.67045	6.4491e-06
FBgn0036710	CG6479	1.67029	4.29474e-06
FBgn0259242	CG42340	1.66975	2.05717e-11
FBgn0036735	Edc3	1.6693	5.50599e-59
FBgn0038286	CG6966	1.66909	1.18639e-59
FBgn0025836	RhoGAP1A	1.66777	3.02463e-80
FBgn0033738	DUBAI	1.66523	4.19058e-38
FBgn0039937	fd102C	1.66233	3.3143e-14
FBgn0032348	CG4751	1.66169	3.31758e-50
FBgn0032946	nrv3	1.66086	0.000691983
FBgn0029751	CG17764	1.65717	7.32965e-06
FBgn0000108	Appl	1.65712	2.48407e-11
FBgn0035113	pyx	1.65662	1.77893e-20
FBgn0029523	CR18275	1.6551	1.15166e-09
FBgn0033483	egr	1.65411	3.69799e-21
FBgn0035812	CG7457	1.6535	5.23604e-60
FBgn0038202	CG12402	1.65318	0.000878398
FBgn0264001	bru3	1.65232	1.583e-07
FBgn0000352	cos	1.65128	9.05824e-45
FBgn0035060	Eps-15	1.65102	1.75615e-25
FBgn0012037	Ance	1.6509	1.90952e-08
FBgn0037109	MED1	1.65021	3.52527e-51
FBgn0031390	tho2	1.64873	4.03183e-70
FBgn0015513	mbc	1.64677	1.35673e-49
FBgn0261385	scra	1.64588	1.21416e-06
FBgn0028982	Spt6	1.64531	3.20984e-22
FBgn0024291	Sirt1	1.64303	2.52506e-57
FBgn0032749	Phlpp	1.64222	0.000727343
FBgn0266572	ebo	1.64172	1.71131e-124
FBgn0030087	CG7766	1.64147	3.48828e-78
FBgn0033482	CG1371	1.64085	2.02491e-25
FBgn0033352	PAN2	1.63978	3.23324e-108
FBgn0031985	mon2	1.63934	4.83119e-68
FBgn0035771	Sec63	1.6388	2.23874e-32
FBgn0039260	Smg6	1.63827	4.50525e-70
FBgn0029870	Marf	1.63754	7.73108e-133
FBgn0051092	LpR2	1.63546	3.70214e-48
FBgn0053554	Nipped-A	1.63132	1.72176e-21
FBgn0030354	Upf1	1.63106	7.44296e-83
FBgn0051015	PH4αPV	1.63046	1.67763e-12
FBgn0023515	Gcna	1.62989	4.81088e-19
FBgn0039908	Asator	1.62966	4.91539e-50
FBgn0031762	CG9098	1.62939	8.01856e-10
FBgn0029525	CG18273	1.62903	8.23988e-70
FBgn0261238	Alh	1.62839	2.63344e-58
FBgn0026179	siz	1.62684	4.09165e-98
FBgn0035227	Iml1	1.62565	6.02825e-50
FBgn0031285	CG3662	1.62467	1.01772e-05
FBgn0051118	RabX4	1.6232	4.17106e-23
FBgn0034796	CG3700	1.62215	1.34927e-39
FBgn0021760	chb	1.62128	5.48939e-35
FBgn0264560	garz	1.62043	7.24404e-88
FBgn0011723	byn	1.62043	3.86206e-34
FBgn0016930	Dyrk2	1.62035	5.56181e-57
FBgn0052000	anne	1.6186	7.9719e-19
FBgn0010651	MFS14	1.61529	6.27147e-09
FBgn0283741	prage	1.6135	3.68447e-26
FBgn0287184	FASN3	1.61326	7.73315e-10
FBgn0027506	EDTP	1.61301	3.33945e-41
FBgn0020626	Osbp	1.61262	2.77645e-76
FBgn0036141	wls	1.61193	3.68528e-13
FBgn0283682	Ge-1	1.61051	1.24206e-72
FBgn0038912	CG6656	1.60986	0.000516457
FBgn0014133	bif	1.60974	2.68268e-53
FBgn0052532	CG32532	1.60867	0.000442482
FBgn0027621	Pfrx	1.60751	1.91925e-35
FBgn0035073	CG16896	1.60653	1.29927e-74
FBgn0034408	sano	1.60499	2.54555e-05
FBgn0039663	CG2321	1.60473	8.62222e-36
FBgn0037336	CG2519	1.60446	5.61616e-25
FBgn0050011	gem	1.60401	3.59366e-79
FBgn0262531	CG43085	1.6035	1.2765e-05
FBgn0001323	knrl	1.60192	5.46063e-27
FBgn0261802	CG42748	1.59895	6.27752e-57
FBgn0286827	lncRNA:CR43334	1.59573	6.55022e-06
FBgn0030593	CG9512	1.59324	3.43359e-05
FBgn0023076	Clk	1.59309	0.000209816
FBgn0259824	Hip14	1.59256	3.27842e-29
FBgn0001325	Kr	1.58731	6.93405e-17
FBgn0262656	Myc	1.58709	5.04828e-28
FBgn0031574	TTLL4B	1.58498	1.27669e-18
FBgn0031401	papi	1.58497	7.8616e-19
FBgn0015402	ksr	1.58392	1.05463e-27
FBgn0041180	Tep4	1.58316	3.62654e-10
FBgn0051619	nolo	1.58302	4.66869e-08
FBgn0035023	ITP	1.58249	2.69705e-08
FBgn0261565	Lmpt	1.58236	0.000168896
FBgn0051999	CG31999	1.58228	5.38315e-11
FBgn0030680	CG8944	1.58103	1.79128e-99
FBgn0003598	Su(var)3-7	1.57859	5.36259e-63
FBgn0267824	PRAS40	1.57839	1.07963e-15
FBgn0288433	L	1.57839	1.07963e-15
FBgn0004635	rho	1.5772	1.72463e-25
FBgn0039182	Rrp5	1.57658	3.07966e-79
FBgn0034964	IntS1	1.57546	7.40244e-52
FBgn0027503	CG11970	1.57372	6.91874e-65
FBgn0039907	lgs	1.57289	8.36666e-47
FBgn0035724	CG10064	1.57174	0.000307076
FBgn0038274	Nup93-2	1.57099	1.54948e-87
FBgn0011836	Taf2	1.56976	1.09496e-109
FBgn0003300	run	1.56951	1.00298e-18
FBgn0026597	Axn	1.56758	1.87102e-47
FBgn0087011	CG41520	1.5641	3.36326e-05
FBgn0000405	CycB	1.56305	2.36395e-103
FBgn0086442	mib2	1.55917	1.42052e-43
FBgn0038872	Nelf-A	1.55896	9.19045e-91
FBgn0035001	Slik	1.55777	7.4808e-97
FBgn0039680	Cap-D2	1.55757	1.01717e-59
FBgn0053181	CG33181	1.55575	7.25423e-73
FBgn0032295	CG12299	1.55355	1.2504e-56
FBgn0052685	ZAP3	1.55255	1.57371e-33
FBgn0043900	pygo	1.55238	2.24561e-57
FBgn0011747	Ank	1.55199	1.20657e-32
FBgn0032243	Klp31E	1.5514	1.20618e-86
FBgn0260397	Su(var)3-3	1.55105	5.63255e-79
FBgn0085421	Epac	1.55094	3.98523e-08
FBgn0263344	asRNA:CR43425	1.55005	9.94985e-05
FBgn0039286	dan	1.54973	5.00018e-42
FBgn0025815	Mcm6	1.54961	1.62211e-65
FBgn0287182	l(3)80Fj	1.54811	2.711e-17
FBgn0260658	CG42541	1.54583	0.000158246
FBgn0000097	aop	1.54554	1.04099e-20
FBgn0086694	Bre1	1.54537	1.88829e-85
FBgn0286516	aqz	1.54475	1.87447e-14
FBgn0010280	Taf4	1.54432	1.65011e-196
FBgn0026598	Apc2	1.54414	1.1953e-31
FBgn0263005	Chpf	1.54355	2.34433e-48
FBgn0004509	Fur1	1.54216	1.29062e-33
FBgn0002921	Atpα	1.54107	3.4176e-22
FBgn0041188	Atx2	1.54088	1.45867e-41
FBgn0033265	coil	1.54075	2.71662e-49
FBgn0020412	JIL-1	1.54059	5.49814e-20
FBgn0034976	CG4049	1.54031	9.7688e-44
FBgn0015949	hrg	1.5399	1.97345e-48
FBgn0039283	danr	1.53915	1.98501e-14
FBgn0033504	CAP	1.53812	1.26624e-12
FBgn0027835	Dp1	1.53708	8.73696e-49
FBgn0037252	CG14650	1.53541	1.58552e-16
FBgn0034529	FAM21	1.53433	1.85486e-56
FBgn0003285	rst	1.53387	3.92182e-24
FBgn0030514	Mrgn1	1.53273	2.42499e-60
FBgn0285991	hpRNA:CR18854	1.53184	7.31922e-18
FBgn0003460	so	1.52842	0.000575251
FBgn0003015	osk	1.52841	2.2639e-41
FBgn0020300	geko	1.52742	2.21994e-08
FBgn0040388	boi	1.52509	2.17152e-45
FBgn0031032	CG14204	1.52283	1.08681e-05
FBgn0283724	Girdin	1.52246	2.60955e-37
FBgn0036340	Srrm1	1.52178	5.70959e-106
FBgn0039559	NSD	1.52127	7.39552e-40
FBgn0085478	Zdhhc8	1.52018	3.74789e-33
FBgn0034722	Rtf1	1.52	1.6498e-20
FBgn0259735	mtgo	1.51994	1.4663e-50
FBgn0266709	Zmynd10	1.51762	0.000284417
FBgn0029006	Smurf	1.51698	5.42475e-93
FBgn0003209	raw	1.51546	4.31704e-63
FBgn0029824	CG3726	1.51455	2.92821e-56
FBgn0037720	CG8312	1.51422	4.66823e-67
FBgn0033376	CG8777	1.51405	5.26576e-38
FBgn0031897	CG13784	1.51197	8.04556e-10
FBgn0033033	scaf	1.51141	1.25722e-06
FBgn0001624	dlg1	1.51138	1.37053e-40
FBgn0005558	ey	1.51046	8.14039e-09
FBgn0265017	lncRNA:CR43751	1.50746	0.000627403
FBgn0027580	PCB	1.50719	4.84242e-85
FBgn0038118	timeout	1.50698	2.07524e-10
FBgn0028579	phtf	1.50588	1.40023e-45
FBgn0029830	Grip	1.50532	4.72837e-48
FBgn0086532	Spt-I	1.50495	1.54768e-16
FBgn0027930	MP1	1.49894	4.24695e-07
FBgn0036461	Zip71B	1.49857	0.000643853
FBgn0024947	NTPase	1.4984	1.18074e-44
FBgn0015803	RtGEF	1.49638	2.59293e-51
FBgn0263782	Hmgcr	1.49524	7.09166e-33
FBgn0029992	Upf2	1.49507	1.16609e-66
FBgn0050421	Usp15-31	1.49494	6.95498e-63
FBgn0000404	CycA	1.49397	7.06143e-75
FBgn0037248	srl	1.4924	1.21087e-19
FBgn0026015	Top3β	1.49222	1.0704e-77
FBgn0034631	TAF1C-like	1.49206	2.96804e-65
FBgn0266916	Cenp-C	1.49162	1.40037e-56
FBgn0286070	cnk	1.49107	1.7234e-39
FBgn0019637	Atu	1.49103	3.77562e-47
FBgn0039562	Gp93	1.48928	3.12845e-10
FBgn0013732	sced	1.48824	2.01962e-88
FBgn0264962	Pcf11	1.48755	1.72575e-46
FBgn0037705	mura	1.48601	3.08363e-26
FBgn0030505	NFAT	1.48556	8.27318e-82
FBgn0034687	CG11475	1.48456	2.10974e-05
FBgn0027594	drpr	1.48293	4.29504e-43
FBgn0051510	CG31510	1.48253	7.23665e-32
FBgn0037339	Pi4KIIα	1.48218	5.92833e-35
FBgn0025681	CG3558	1.48112	2.56364e-129
FBgn0027602	CG8611	1.48086	2.76269e-66
FBgn0261988	Gprk2	1.48073	7.00377e-47
FBgn0000577	en	1.4781	1.19517e-09
FBgn0039566	CG4849	1.47785	2.03019e-49
FBgn0038303	SIDL	1.47748	3.91932e-60
FBgn0034087	clu	1.47576	1.62092e-27
FBgn0034175	ste24b	1.47575	7.58423e-05
FBgn0034249	RhoGAP54D	1.47472	3.83596e-116
FBgn0267576	lncRNA:CR45916	1.47382	1.07434e-22
FBgn0004463	Polr3B	1.47378	9.87895e-71
FBgn0039602	CG1647	1.47284	2.0885e-105
FBgn0024921	Tnpo	1.47274	1.33485e-25
FBgn0028499	CG7985	1.47234	2.67429e-39
FBgn0015777	nrv2	1.47218	4.24148e-06
FBgn0001986	Mtr4	1.47099	1.93275e-64
FBgn0031187	Usp2	1.47098	1.40765e-48
FBgn0027568	Cand1	1.47061	3.4103e-52
FBgn0003278	Polr1B	1.47013	2.94374e-38
FBgn0031540	Pif1	1.46949	1.98809e-33
FBgn0051777	CG31777	1.46841	0.000147462
FBgn0039113	udt	1.46803	3.47494e-09
FBgn0029912	CG4557	1.46511	2.3694e-34
FBgn0261985	Ptpmeg	1.46486	8.78105e-124
FBgn0086613	Ino80	1.46298	7.17532e-40
FBgn0043456	Ndf	1.46219	8.35417e-73
FBgn0035266	Gk2	1.46153	2.14822e-100
FBgn0029706	CG3626	1.45975	2.99758e-79
FBgn0031070	CG12702	1.45864	4.18996e-42
FBgn0266351	asRNA:CR45000	1.45762	7.78013e-05
FBgn0036752	Adgf-A	1.45704	2.43146e-09
FBgn0000376	crm	1.45685	5.41766e-82
FBgn0033984	Lap1	1.45676	1.01808e-53
FBgn0030685	Graf	1.45604	2.00327e-31
FBgn0034997	CG3376	1.45518	4.13297e-21
FBgn0261113	Xrp1	1.45477	6.03688e-10
FBgn0032399	CG6785	1.45356	3.06444e-08
FBgn0260758	CG42556	1.45348	0.000124509
FBgn0031606	CG15439	1.45281	1.64793e-66
FBgn0003710	tipE	1.45271	1.74954e-23
FBgn0026722	drosha	1.45207	1.80779e-64
FBgn0038325	Atg4b	1.44922	2.32481e-83
FBgn0024510	dlt	1.44907	2.9726e-45
FBgn0030293	CG1737	1.44845	1.67541e-61
FBgn0025455	CycT	1.44801	1.03042e-62
FBgn0000659	fkh	1.44794	1.7599e-10
FBgn0013997	Nrx-IV	1.44779	5.31437e-30
FBgn0023213	eIF4G1	1.44707	8.63859e-21
FBgn0050431	CG30431	1.4469	0.000780848
FBgn0032934	CG8679	1.4445	2.65238e-56
FBgn0027660	blot	1.44398	5.24328e-21
FBgn0020556	lncRNA:bxd	1.44228	4.32796e-08
FBgn0000233	btd	1.441	3.0495e-10
FBgn0020497	emb	1.43847	2.24802e-41
FBgn0013765	cnn	1.43803	2.97601e-58
FBgn0039430	CG5455	1.43776	6.88488e-12
FBgn0031885	Mnn1	1.43697	6.38628e-49
FBgn0263144	bin3	1.43634	8.12301e-93
FBgn0051989	Cap-D3	1.436	2.256e-46
FBgn0011336	Stt3B	1.43552	3.88228e-20
FBgn0039858	CycG	1.43549	1.13684e-75
FBgn0262117	IntS3	1.43186	2.91517e-29
FBgn0035099	CG6845	1.43023	1.6557e-05
FBgn0033564	Pex6	1.42839	6.42201e-33
FBgn0260462	CtsF	1.42744	6.06418e-05
FBgn0003268	rod	1.42713	6.14977e-61
FBgn0260639	γTub23C	1.42688	4.08417e-57
FBgn0250816	AGO3	1.4266	2.37653e-12
FBgn0034275	CG5002	1.42639	5.27467e-05
FBgn0015623	Cpr	1.42631	2.49177e-15
FBgn0000578	ena	1.42568	5.79329e-53
FBgn0052476	mthl14	1.42559	0.000667781
FBgn0005674	GluProRS	1.42488	7.42637e-24
FBgn0027505	Rab3-GAP	1.42406	4.20071e-40
FBgn0016684	NaPi-T	1.42121	7.17031e-09
FBgn0033188	Drat	1.42078	0.000593809
FBgn0003950	unc	1.42037	1.90718e-10
FBgn0263993	CG43736	1.41953	1.6459e-49
FBgn0030018	slpr	1.41945	2.20296e-69
FBgn0027335	Rip11	1.41836	3.02209e-72
FBgn0035833	CG7565	1.41775	2.90234e-38
FBgn0001085	fz	1.41757	5.5486e-10
FBgn0267795	Frl	1.41733	4.63066e-43
FBgn0002645	Map205	1.4173	3.00747e-21
FBgn0017558	Pdk	1.41499	5.78691e-42
FBgn0005536	Mbs	1.41471	5.73884e-93
FBgn0033915	Snrk	1.41469	3.39038e-57
FBgn0262617	Nuak	1.41427	2.03106e-59
FBgn0262714	Sap130	1.41331	2.50802e-46
FBgn0000562	egl	1.41331	3.13909e-79
FBgn0039055	Rassf	1.41107	1.30169e-48
FBgn0016794	dos	1.41052	3.36803e-16
FBgn0038475	Keap1	1.41031	1.2555e-57
FBgn0043791	phu	1.40923	1.37209e-14
FBgn0038535	alt	1.40908	5.94343e-20
FBgn0035622	TM9SF3	1.40803	9.73138e-08
FBgn0039749	CG11498	1.40715	0.000167479
FBgn0027108	Inx2	1.4061	4.02247e-18
FBgn0038071	Dtg	1.4055	1.98964e-17
FBgn0261283	SREBP	1.40388	3.20383e-35
FBgn0039904	Hcf	1.40359	1.46235e-65
FBgn0031632	CG15628	1.39933	2.38813e-16
FBgn0030660	CG8097	1.39884	1.86446e-37
FBgn0260866	dnr1	1.39736	1.52539e-17
FBgn0043458	CG12084	1.39669	1.13372e-59
FBgn0032587	CG5953	1.39668	1.51298e-62
FBgn0036386	CG8833	1.39582	2.75236e-43
FBgn0025621	CG16989	1.39529	2.8964e-48
FBgn0261822	Bsg	1.3942	2.34296e-08
FBgn0050035	Tret1-1	1.39397	0.000128899
FBgn0030034	CG10555	1.39254	2.99296e-52
FBgn0028789	Doc1	1.39165	2.15356e-16
FBgn0265888	lncRNA:CR44677	1.39109	0.000268633
FBgn0262124	uex	1.39091	1.02848e-11
FBgn0013343	Syx1A	1.38959	5.93789e-44
FBgn0015615	SMC3	1.38748	1.15367e-64
FBgn0027106	Inx7	1.38733	0.000559502
FBgn0086686	l(3)L1231	1.38709	3.24731e-56
FBgn0027620	Acf	1.38686	7.19221e-93
FBgn0263659	lncRNA:CR43650	1.3865	0.000679583
FBgn0010433	ato	1.38539	2.6456e-07
FBgn0035498	Fit1	1.38498	9.21769e-91
FBgn0262169	magu	1.38495	3.80686e-19
FBgn0028484	Ack	1.38328	9.68968e-49
FBgn0034110	Atg9	1.3822	9.44847e-15
FBgn0029893	CG14442	1.38175	2.05194e-64
FBgn0086898	dgo	1.38165	6.23872e-50
FBgn0029067	Dd	1.38125	1.88629e-18
FBgn0259221	ATP8A	1.38022	4.42758e-52
FBgn0031149	Stt3A	1.37928	2.70895e-11
FBgn0052666	Drak	1.3788	6.6892e-35
FBgn0261477	slim	1.37627	1.33002e-48
FBgn0085423	GramD1B	1.37593	2.54299e-34
FBgn0034258	eIF3c	1.37548	1.38252e-45
FBgn0039696	Rnb	1.37528	3.13321e-76
FBgn0026393	Or43b	1.37484	2.89937e-29
FBgn0041630	Hexo1	1.37433	2.46573e-12
FBgn0030403	CG1824	1.37036	1.77734e-32
FBgn0028369	kirre	1.36968	3.82931e-07
FBgn0030240	CG2202	1.36932	4.37516e-41
FBgn0028490	CG31705	1.36867	0.000107052
FBgn0051368	CG31368	1.36724	3.71364e-23
FBgn0002121	l(2)gl	1.36718	6.0045e-32
FBgn0260439	Pp2A-29B	1.36709	9.14233e-20
FBgn0051935	Rab3GAP1	1.36501	2.61801e-109
FBgn0031573	CG3407	1.36433	3.12293e-17
FBgn0036828	Prp6	1.36376	5.43308e-08
FBgn0036448	mop	1.3619	1.8772e-29
FBgn0264507	asRNA:CR43906	1.36185	9.2759e-09
FBgn0040071	tara	1.36132	4.46894e-15
FBgn0034071	CG8405	1.35991	7.35287e-45
FBgn0044323	Cka	1.3578	4.25172e-104
FBgn0025743	mbt	1.3574	2.53972e-99
FBgn0029874	CG3342	1.3559	7.39124e-34
FBgn0087013	Karyβ3	1.35426	1.20136e-79
FBgn0032233	dpr19	1.35402	0.000321416
FBgn0039644	rdog	1.35147	1.35443e-40
FBgn0038395	Jhbp5	1.34889	6.62643e-18
FBgn0036791	CG7271	1.34823	7.08732e-21
[truncated: 888 more rows]

## Sheet: Dcr-2 IP vs IgG IP
Adjusted p-value < 0,001 and log2 Fold Change > 0,584962 (i.e. 1,5 fold)
FlyBase ID	Gene name	log2FC	padj
FBgn0261454	scaRNA:MeU4-A65	4.39595	7.22421e-06
FBgn0030594	fiz	4.34334	7.45893e-05
FBgn0267759	lncRNA:CR46090	4.09365	0.000733575
FBgn0027521	CG3679	3.70763	1.8115e-71
FBgn0013726	pnut	3.62421	1.64341e-103
FBgn0033806	FLASH	3.46504	8.13465e-75
FBgn0266262	lncRNA:CR44957	3.27079	0.000764652
FBgn0035918	Cdc6	3.26394	8.56221e-75
FBgn0086408	stl	3.23405	2.52892e-06
FBgn0250754	CG42232	3.20212	4.27678e-143
FBgn0086908	egg	3.11983	2.01044e-140
FBgn0050020	CG30020	3.09928	5.07843e-80
FBgn0035021	CG4622	3.09214	3.30916e-180
FBgn0020278	loco	2.99392	1.04095e-73
FBgn0261453	scaRNA:MeU2-C41	2.98933	2.44252e-10
FBgn0287725	sov	2.95422	5.3205e-58
FBgn0086603	snoRNA:Or-CD2	2.85713	1.74819e-10
FBgn0015625	CycB3	2.85193	3.58388e-138
FBgn0031820	Daxx	2.82346	7.79241e-51
FBgn0262167	ana1	2.81075	5.22558e-114
FBgn0065051	scaRNA:MeU5-U42	2.77129	4.73823e-05
FBgn0085734	CR40450	2.7446	2.87196e-22
FBgn0004698	Xpc	2.71706	1.70627e-65
FBgn0261555	CG42673	2.69541	0.000123896
FBgn0033659	Damm	2.6586	0.000207122
FBgn0085390	Dgk	2.64976	1.30764e-05
FBgn0026427	Su(var)2-HP2	2.64971	2.90868e-19
FBgn0003575	su(sable)	2.64294	2.38504e-112
FBgn0265356	tn	2.63811	1.72336e-05
FBgn0261786	mi	2.63464	1.74844e-57
FBgn0263511	Vsx1	2.59961	0.000114797
FBgn0260793	2mit	2.59606	0.000267728
FBgn0267390	dop	2.58092	2.17182e-71
FBgn0027655	htt	2.56308	4.05525e-42
FBgn0263846	CG43707	2.54964	0.000549095
FBgn0034070	SP2353	2.54173	6.47743e-05
FBgn0286782	flz	2.54053	7.35297e-08
FBgn0032723	ssp3	2.53892	3.62761e-101
FBgn0030365	Tango4	2.52554	2.35027e-43
FBgn0259734	Nost	2.52372	1.3581e-57
FBgn0039380	CG5890	2.5224	4.61864e-09
FBgn0025866	CalpB	2.51702	5.5339e-65
FBgn0038279	Sdr	2.4948	3.01649e-14
FBgn0053147	Hs3st-A	2.48737	0.000251687
FBgn0037573	CG7483	2.46896	1.32672e-116
FBgn0034644	Ip6k	2.45728	4.89986e-66
FBgn0267041	asRNA:CR45485	2.44979	7.72969e-31
FBgn0266304	asRNA:CR44969	2.42786	4.20154e-05
FBgn0025626	CG4281	2.42722	8.33673e-92
FBgn0259791	bora	2.40423	5.98801e-55
FBgn0260965	CG42588	2.40085	3.40932e-33
FBgn0263471	scaRNA:MeU2-48	2.39106	0.000226371
FBgn0032821	CdGAPr	2.38959	6.42215e-41
FBgn0035798	frac	2.37202	0.000779896
FBgn0027528	goe	2.36818	4.33495e-18
FBgn0016917	Stat92E	2.366	9.35934e-50
FBgn0011710	Septin1	2.36353	5.24674e-105
FBgn0031725	DIP-η	2.36147	0.000664068
FBgn0004575	Syn	2.36089	0.000448299
FBgn0028490	CG31705	2.35442	4.47313e-12
FBgn0029091	Chs2	2.3302	0.000925415
FBgn0266756	btsz	2.32822	1.06139e-55
FBgn0032252	loh	2.3269	1.80672e-05
FBgn0001206	Hmr	2.32546	6.52114e-63
FBgn0029881	pigs	2.31878	1.79235e-48
FBgn0010926	l(3)07882	2.30548	5.59619e-85
FBgn0051457	CG31457	2.28349	1.61986e-52
FBgn0086708	stv	2.27937	8.89361e-05
FBgn0264273	Sema2b	2.25744	0.000531269
FBgn0087008	e(y)3	2.25676	1.76236e-42
FBgn0260742	CG12213	2.25501	4.87529e-09
FBgn0010825	Gug	2.25319	1.8637e-61
FBgn0053558	mim	2.25295	9.32532e-49
FBgn0011260	Sema2a	2.24476	5.33639e-10
FBgn0040011	Slmap	2.23965	7.24151e-32
FBgn0037698	CG16779	2.23201	7.45016e-06
FBgn0285944	para	2.22324	0.000957478
FBgn0029873	CG3918	2.20733	1.06578e-29
FBgn0015400	kek2	2.19682	0.000282579
FBgn0086690	Plp	2.19204	2.9858e-34
FBgn0260440	spdo	2.18666	0.000300097
FBgn0030266	CG11122	2.18446	3.45705e-42
FBgn0031878	sip2	2.18428	2.08105e-46
FBgn0035676	ssp6	2.17255	3.78232e-06
FBgn0052529	Hers	2.17159	2.559e-29
FBgn0023541	Cyp4d14	2.15811	5.2389e-05
FBgn0038156	side-IV	2.14061	8.56325e-06
FBgn0039536	unc80	2.14025	3.85133e-07
FBgn0259212	cno	2.11807	1.24514e-46
FBgn0034985	CG3328	2.10971	0.000243295
FBgn0037924	CG14712	2.10301	1.53031e-09
FBgn0032129	jp	2.09263	0.000110077
FBgn0000404	CycA	2.08373	1.61688e-157
FBgn0036365	cmb	2.08055	1.96431e-26
FBgn0026415	Idgf4	2.07402	3.1035e-07
FBgn0288433	L	2.06911	4.18615e-05
FBgn0024250	brk	2.05288	1.20254e-39
FBgn0045852	ham	2.05243	6.94859e-11
FBgn0000625	eyg	2.04807	0.000356197
FBgn0034722	Rtf1	2.04273	9.41879e-39
FBgn0260442	rhea	2.04075	1.0289e-47
FBgn0082831	pps	2.03571	7.86025e-70
FBgn0001311	kkv	2.0335	4.52108e-05
FBgn0002932	neur	2.01421	1.49524e-51
FBgn0032467	Ube4B	2.01325	4.54832e-77
FBgn0023172	RhoGEF2	2.00354	2.14543e-41
FBgn0285917	sbb	2.00354	6.38438e-62
FBgn0250907	Cht10	1.99494	8.08566e-15
FBgn0002673	twe	1.99289	1.24691e-35
FBgn0001077	ftz	1.98979	4.74568e-26
FBgn0039302	Nup358	1.9804	3.89647e-79
FBgn0034854	Golgin245	1.98016	9.70143e-101
FBgn0052369	CG32369	1.97991	4.2252e-05
FBgn0028331	l(1)G0289	1.96832	4.15791e-19
FBgn0004449	Ten-m	1.96603	1.031e-18
FBgn0039075	CG4393	1.96576	0.000630334
FBgn0016641	PTP-ER	1.96559	3.02607e-33
FBgn0052767	CG32767	1.96517	2.02887e-75
FBgn0038665	euc	1.96202	1.18834e-06
FBgn0003977	vir	1.95776	4.23077e-63
FBgn0033901	O-fut1	1.95365	1.01854e-20
FBgn0263490	mld	1.94284	7.98501e-42
FBgn0000405	CycB	1.93634	8.46357e-173
FBgn0003513	ss	1.92863	0.000218611
FBgn0264901	lncRNA:CR44092	1.92675	5.29777e-20
FBgn0037565	CG9626	1.92428	8.41217e-17
FBgn0259878	Fs	1.92208	0.000163467
FBgn0262872	milt	1.92064	1.08187e-66
FBgn0033987	ckn	1.91884	1.68514e-44
FBgn0263346	smash	1.9183	9.25712e-74
FBgn0023090	dtr	1.90592	6.28675e-09
FBgn0085245	CG34216	1.90452	9.28379e-18
FBgn0034498	CG16868	1.9022	1.244e-16
FBgn0266098	rg	1.89905	2.24256e-16
FBgn0286071	AdamTS-A	1.89683	3.59153e-07
FBgn0025776	ind	1.89626	6.44064e-08
FBgn0002917	na	1.89216	5.28309e-07
FBgn0039633	Bicra	1.88828	6.78491e-30
FBgn0061200	Nup153	1.88802	6.27026e-41
FBgn0028539	Eato	1.88686	7.37776e-14
FBgn0031285	CG3662	1.88628	9.39429e-08
FBgn0041723	rho-5	1.88481	1.8381e-08
FBgn0003733	tor	1.88241	3.13274e-34
FBgn0043884	mask	1.88141	2.78649e-27
FBgn0038385	Fbxl7	1.88039	6.18493e-21
FBgn0082931	snoRNA:Me28S-G2703a	1.87139	0.000256015
FBgn0036746	Crtc	1.8699	3.0226e-44
FBgn0265058	asRNA:CR44169	1.86856	0.000357388
FBgn0032348	CG4751	1.86836	3.74226e-67
FBgn0261617	nej	1.86779	2.15386e-30
FBgn0020496	CtBP	1.86731	8.4778e-63
FBgn0261671	tweek	1.86465	6.55347e-16
FBgn0025373	Fpps	1.86445	9.33357e-81
FBgn0086711	mol	1.86025	1.51144e-12
FBgn0259789	zld	1.85683	1.32998e-39
FBgn0262483	Rbp	1.85362	5.1061e-05
FBgn0025740	PlexB	1.85144	1.72586e-07
FBgn0266411	sima	1.84895	2.54341e-30
FBgn0263239	dar1	1.84645	9.38121e-06
FBgn0267279	asRNA:CR45715	1.84297	9.64396e-05
FBgn0016794	dos	1.8423	9.8834e-29
FBgn0020617	Rx	1.84197	0.000282869
FBgn0052436	CG32436	1.83815	3.12549e-06
FBgn0250816	AGO3	1.8364	3.74295e-21
FBgn0051163	SKIP	1.83355	4.785e-26
FBgn0037344	CG2926	1.83304	8.75142e-83
FBgn0264502	CG43901	1.83255	1.97659e-07
FBgn0039016	Dcr-1	1.82855	8.40966e-37
FBgn0011653	mas	1.82388	8.99355e-09
FBgn0031118	RhoGAP19D	1.82126	2.88262e-32
FBgn0016122	Acer	1.81682	9.11509e-12
FBgn0034246	Dcr-2	1.81601	2.55669e-22
FBgn0004656	fs(1)h	1.81353	9.0726e-48
FBgn0037205	BoYb	1.81125	9.53961e-44
FBgn0003963	ush	1.80947	1.30979e-18
FBgn0016059	Sema1b	1.80731	6.68037e-16
FBgn0026575	hang	1.80155	5.55604e-85
FBgn0263980	Stacl	1.80069	0.000328703
FBgn0085408	Shrm	1.79987	1.31227e-37
FBgn0021764	sdk	1.79953	7.89888e-15
FBgn0283472	S6k	1.79939	1.87282e-23
FBgn0052677	X11Lβ	1.79705	0.000230797
FBgn0004595	pros	1.78905	4.05124e-20
FBgn0000463	Dl	1.78763	8.99029e-17
FBgn0036398	upSET	1.78642	2.16782e-35
FBgn0033247	Nup44A	1.78563	9.87415e-17
FBgn0000414	Dab	1.78407	4.52312e-28
FBgn0050115	GEFmeso	1.78406	2.50257e-10
FBgn0027535	botv	1.78246	4.96866e-17
FBgn0040022	Set1	1.78101	2.8969e-28
FBgn0004885	tok	1.77773	1.90925e-17
FBgn0261800	LanB1	1.77449	2.92952e-11
FBgn0053978	CG33978	1.77141	3.58828e-06
FBgn0036735	Edc3	1.77096	1.91543e-71
FBgn0036710	CG6479	1.76979	4.07626e-07
FBgn0000320	eya	1.76889	3.58962e-09
FBgn0015803	RtGEF	1.76701	1.86166e-75
FBgn0035106	rno	1.76557	2.2378e-30
FBgn0002643	mam	1.7655	3.8716e-23
FBgn0039688	Kul	1.76456	2.26463e-13
FBgn0025633	spdi	1.76121	1.24845e-35
FBgn0023518	trr	1.76034	8.44857e-48
FBgn0283657	Tlk	1.75793	1.23058e-54
FBgn0033638	atos	1.75748	7.87138e-46
FBgn0036789	AstC-R2	1.75648	6.49091e-06
FBgn0023407	B4	1.75568	4.59247e-32
FBgn0262160	CG9932	1.75158	0.000278049
FBgn0039120	Nup98-96	1.74999	5.0922e-42
FBgn0033265	coil	1.74964	6.02976e-65
FBgn0263132	Cht6	1.7487	1.1078e-08
FBgn0000492	Dr	1.74183	8.61255e-08
FBgn0267348	LanB2	1.73778	1.27563e-08
FBgn0037963	Cad87A	1.73197	4.58102e-19
FBgn0036959	CG6951	1.73007	4.68459e-29
FBgn0023515	Gcna	1.72889	5.99389e-23
FBgn0263986	cd	1.72822	6.80841e-05
FBgn0039214	puf	1.72311	1.60783e-18
FBgn0261549	rdgA	1.72123	1.65442e-55
FBgn0264089	sli	1.72004	5.60509e-19
FBgn0025864	Crag	1.71626	6.9671e-82
FBgn0003048	pcx	1.71332	4.53545e-22
FBgn0267457	asRNA:CR45807	1.71308	0.000272415
FBgn0004649	yl	1.71074	1.26251e-17
FBgn0036544	sff	1.7105	0.000325314
FBgn0013272	Gp150	1.70678	1.79047e-14
FBgn0052580	Muc14A	1.70366	4.76916e-05
FBgn0016977	spen	1.70242	4.72437e-30
FBgn0265991	Zasp52	1.7017	7.31314e-14
FBgn0032593	Trpγ	1.70131	0.000571077
FBgn0029864	CG15894	1.70047	5.39612e-05
FBgn0053208	Mical	1.69784	1.00557e-71
FBgn0032395	Wdr81	1.69422	2.92217e-41
FBgn0264495	gpp	1.69392	1.13292e-19
FBgn0265523	Smr	1.69059	3.76026e-20
FBgn0026189	promL	1.69003	3.53813e-14
FBgn0026869	Tdg	1.68869	1.16838e-41
FBgn0000547	ed	1.68846	1.0497e-13
FBgn0287478	Camta	1.68802	2.51479e-45
FBgn0035086	CG12851	1.68777	1.86096e-12
FBgn0003463	sog	1.68631	4.10805e-18
FBgn0261570	raskol	1.68615	9.55229e-34
FBgn0035954	Doc3	1.68564	1.07366e-18
FBgn0261574	kug	1.68545	6.04797e-12
FBgn0033108	CG15236	1.68542	0.000142651
FBgn0013811	Dhc62B	1.68425	4.56869e-05
FBgn0038755	Hs6st	1.68395	1.55727e-14
FBgn0039234	Nct	1.68278	1.80612e-13
FBgn0019661	lncRNA:roX1	1.68247	1.15299e-24
FBgn0034598	CG4266	1.68015	2.06271e-32
FBgn0020306	dom	1.67785	2.56858e-42
FBgn0038499	Brf	1.67739	3.58705e-38
FBgn0031077	THADA	1.67212	5.37116e-34
FBgn0004391	shtd	1.6712	5.32307e-51
FBgn0261885	osa	1.66904	1.37333e-33
FBgn0035094	CG9380	1.66387	1.76452e-08
FBgn0004839	otk	1.65741	5.88417e-06
FBgn0023458	Rbcn-3A	1.65575	1.64998e-21
FBgn0261931	Hecw	1.65542	2.12902e-47
FBgn0022764	Sin3A	1.65516	1.38541e-49
FBgn0000464	Lar	1.65476	9.57566e-19
FBgn0027508	Tnks	1.6537	3.59885e-45
FBgn0011785	BRWD3	1.65081	1.60123e-52
FBgn0002441	l(3)mbt	1.6492	2.10829e-79
FBgn0000017	Abl	1.6489	2.12774e-55
FBgn0026197	lncRNA:noe	1.64886	1.39471e-06
FBgn0014007	Ptp69D	1.64853	1.567e-11
FBgn0039883	RhoGAP100F	1.64419	1.2257e-10
FBgn0038601	Polr1E	1.6441	3.75622e-83
FBgn0026620	tacc	1.64373	7.98357e-41
FBgn0268063	ltl	1.6423	4.92492e-11
FBgn0038853	RhoGAP93B	1.64145	9.11997e-58
FBgn0039286	dan	1.6397	7.98274e-48
FBgn0263397	Ih	1.63943	0.000287412
FBgn0003301	rut	1.63912	6.90177e-13
FBgn0260934	par-1	1.63795	1.6126e-55
FBgn0284221	Sema5c	1.635	6.64405e-24
FBgn0083940	RhoU	1.63494	2.62697e-30
FBgn0262733	Src64B	1.63036	6.98412e-55
FBgn0051140	CG31140	1.6288	0.000738897
FBgn0036004	Jarid2	1.62878	3.82737e-51
FBgn0003598	Su(var)3-7	1.62649	3.40273e-72
FBgn0285955	cv-c	1.62599	0.000145015
FBgn0039073	CG4408	1.62574	8.54378e-09
FBgn0041092	tai	1.62411	1.00867e-42
FBgn0037838	TTLL15	1.62153	1.90532e-08
FBgn0015773	NetA	1.61792	3.43961e-11
FBgn0031981	Megf8	1.61662	7.97749e-24
FBgn0036374	Spt20	1.61641	1.14226e-48
FBgn0013813	Dhc98D	1.61628	6.25055e-12
FBgn0005616	msl-2	1.61583	2.46481e-22
FBgn0266053	Patr-1	1.61453	4.36039e-25
FBgn0261954	east	1.61236	6.71029e-38
FBgn0036534	DCP2	1.61234	1.59774e-38
FBgn0032748	CG10492	1.61022	2.50966e-35
FBgn0003391	shg	1.60761	1.98006e-18
FBgn0011740	α-Man-IIa	1.60624	1.35624e-14
FBgn0050015	CG30015	1.60564	3.17382e-31
FBgn0262473	Tl	1.60449	3.6968e-12
FBgn0031573	CG3407	1.60439	6.44676e-25
FBgn0040271	Sulf1	1.60335	3.30195e-15
FBgn0004191	snRNA:U2:34ABa	1.60335	2.09766e-07
FBgn0266019	rudhira	1.60173	4.90679e-47
FBgn0039654	Brd8	1.60081	5.03535e-74
FBgn0010051	Itpr	1.59915	3.17261e-25
FBgn0030366	Usp7	1.59893	2.27167e-48
FBgn0261710	nocte	1.59782	1.22244e-31
FBgn0031169	CG1494	1.59751	8.7733e-05
FBgn0029874	CG3342	1.59495	4.8462e-48
FBgn0019637	Atu	1.59422	2.04155e-57
FBgn0015774	NetB	1.59419	1.49986e-09
FBgn0026059	Mhcl	1.59356	2.27908e-24
FBgn0036147	Plod	1.58962	1.00042e-12
FBgn0259224	CG42324	1.58548	0.000348098
FBgn0003731	Egfr	1.58487	1.20751e-22
FBgn0259685	crb	1.58301	1.81031e-23
FBgn0261556	CG42674	1.58299	9.44412e-47
FBgn0003507	srp	1.57682	1.72756e-25
FBgn0263415	lncRNA:CR43461	1.57631	0.000123534
FBgn0264542	hwt	1.57624	2.6523e-46
FBgn0020912	Ptx1	1.57534	0.000651169
FBgn0023531	CG32809	1.57526	1.73639e-32
FBgn0010473	tutl	1.57434	4.76574e-22
FBgn0261873	sdt	1.5743	1.57338e-37
FBgn0002431	hyd	1.57422	1.7236e-33
FBgn0085430	Dora	1.57416	7.69892e-23
FBgn0028982	Spt6	1.57286	4.90003e-22
FBgn0000542	ec	1.57147	2.41035e-21
FBgn0085412	kmr	1.56956	1.02801e-15
FBgn0266084	Fhos	1.56673	1.44972e-12
FBgn0053519	Unc-89	1.56482	0.000319498
FBgn0036451	Helz	1.56476	1.58854e-48
FBgn0031374	Wdr62	1.56462	6.08557e-93
FBgn0026616	α-Man-IIb	1.56415	5.15166e-17
FBgn0085451	htk	1.56329	2.15036e-30
FBgn0051038	CG31038	1.56228	3.37465e-06
FBgn0030343	ATP7	1.55806	2.54702e-40
FBgn0010355	Taf1	1.558	1.90606e-56
FBgn0035237	CG13917	1.5568	6.90883e-28
FBgn0053144	CG33144	1.55665	2.35305e-56
FBgn0259984	kuz	1.55591	2.83522e-19
FBgn0010488	NAT1	1.55396	7.50025e-46
FBgn0035713	velo	1.55219	1.42237e-61
FBgn0028996	onecut	1.54805	1.42859e-05
FBgn0004647	N	1.54631	4.55269e-24
FBgn0038223	Afti	1.54608	3.76214e-51
FBgn0265194	Trpm	1.54601	1.35087e-19
FBgn0037240	Cont	1.54506	1.64406e-13
FBgn0037248	srl	1.54249	1.47147e-22
FBgn0034530	Rcd6	1.54231	0.00012114
FBgn0032481	CG16972	1.54157	6.43605e-37
FBgn0032479	CG16974	1.54083	5.90824e-23
FBgn0000307	chif	1.54059	6.71318e-25
FBgn0004370	Ptp10D	1.53913	3.53242e-40
FBgn0051151	wge	1.53893	2.34973e-26
FBgn0086451	l(2)k09022	1.53806	2.71879e-42
FBgn0040297	Nhe2	1.53781	9.95465e-20
FBgn0030466	CG15744	1.53582	5.8642e-32
FBgn0263197	Patronin	1.53533	1.45524e-22
FBgn0053087	LRP1	1.53489	1.02694e-20
FBgn0283712	LIMK1	1.53357	5.06266e-60
FBgn0020299	stumps	1.53304	1.02207e-26
FBgn0267350	Pi4KIIIα	1.53304	7.56848e-31
FBgn0286204	ich	1.53239	1.34854e-17
FBgn0032752	CG10702	1.53143	1.95941e-21
FBgn0262527	nsl1	1.53126	1.80517e-47
FBgn0034400	CG15099	1.52968	3.81301e-58
FBgn0262562	CG43102	1.52965	4.72801e-15
FBgn0029088	disp	1.52754	5.22058e-16
FBgn0267001	Ten-a	1.52706	3.65782e-17
FBgn0034641	mahj	1.52394	2.21435e-74
FBgn0003654	sw	1.52374	2.28391e-15
FBgn0052296	Mrtf	1.52345	9.66348e-50
FBgn0025936	Eph	1.52293	2.20743e-09
FBgn0001169	H	1.52218	5.35289e-27
FBgn0000581	E(Pc)	1.52211	1.16288e-32
FBgn0085409	smal	1.52149	0.000182123
FBgn0033636	tou	1.52068	4.36014e-37
FBgn0025702	Srpk79D	1.52063	2.69311e-13
FBgn0039492	CG6051	1.52013	2.02887e-75
FBgn0263219	Dscam4	1.51773	1.21442e-05
FBgn0036668	Zcchc7	1.51739	2.95924e-64
FBgn0052365	CG32365	1.51628	2.75358e-11
FBgn0262582	cic	1.51395	2.83527e-50
FBgn0034049	bdg	1.51272	7.59414e-40
FBgn0044452	Atg2	1.51188	1.6152e-33
FBgn0003165	pum	1.50848	1.26397e-23
FBgn0262111	f	1.50847	5.68625e-06
FBgn0011474	Set8	1.50681	2.13927e-81
FBgn0034240	MESR4	1.50654	1.34307e-29
FBgn0004657	mys	1.50612	3.31617e-12
FBgn0261649	tinc	1.50607	7.42709e-16
FBgn0032683	kon	1.50573	0.00017978
FBgn0031001	CG7884	1.50422	2.13889e-08
FBgn0262579	Sarm	1.50233	4.76666e-33
FBgn0003002	opa	1.50073	4.6307e-18
FBgn0024806	DIP2	1.50044	9.21905e-30
FBgn0003459	stwl	1.50005	1.79183e-44
FBgn0031078	Nup205	1.49855	1.13962e-44
FBgn0038651	Epg5	1.49776	8.36767e-33
FBgn0036612	CG4998	1.49744	7.70365e-06
FBgn0023479	teq	1.49737	3.19485e-09
FBgn0285954	caz	1.49666	4.35563e-13
FBgn0026061	Mipp1	1.49484	2.1417e-06
FBgn0034013	unc-5	1.49434	0.000110407
FBgn0010300	brat	1.49324	1.7871e-56
FBgn0264357	SNF4Aγ	1.49222	3.02029e-80
FBgn0052479	Usp10	1.49039	5.78737e-33
FBgn0004861	ph-p	1.48991	2.45525e-27
FBgn0029093	cathD	1.4893	0.000505892
FBgn0052829	CG32829	1.48883	1.33353e-07
FBgn0031294	IA-2	1.48742	1.21784e-05
FBgn0035142	Hipk	1.4847	5.95635e-33
FBgn0033194	Vps13	1.48412	5.19227e-23
FBgn0035357	MEP-1	1.48212	5.9384e-08
FBgn0016756	Usp47	1.48111	5.90297e-20
FBgn0035162	Sf3b3	1.48067	1.09057e-53
FBgn0015278	Pi3K68D	1.48056	1.94756e-36
FBgn0261444	CG3638	1.47939	3.11317e-22
FBgn0011576	Cyp4d2	1.47763	1.34671e-05
FBgn0031696	Bub1	1.4763	1.14282e-44
FBgn0040752	Prosap	1.4758	2.20573e-41
FBgn0263873	sick	1.47535	3.58013e-06
FBgn0027611	LManII	1.47494	6.46631e-11
FBgn0265901	asRNA:CR44690	1.47366	3.75368e-25
FBgn0001991	Ca-α1D	1.47244	2.48015e-06
FBgn0031052	Elys	1.47197	1.91642e-38
FBgn0264975	Nrg	1.47175	6.64937e-22
FBgn0038108	CG7518	1.47137	8.29044e-36
FBgn0033313	Cirl	1.46977	3.20248e-20
FBgn0033122	CG17002	1.46955	5.72382e-26
FBgn0267033	mamo	1.46858	2.43384e-07
FBgn0261934	dikar	1.4682	4.23671e-15
FBgn0039907	lgs	1.46755	3.5038e-44
FBgn0085407	Pvf3	1.46725	1.07078e-05
FBgn0003683	term	1.46627	1.63016e-24
FBgn0039283	danr	1.46427	2.82653e-13
FBgn0263599	Brr2	1.46374	1.67751e-26
FBgn0035523	Ctl1	1.45993	5.6724e-08
FBgn0035574	RhoGEF64C	1.45991	2.31239e-21
FBgn0288469	Pex23	1.45766	5.42006e-24
FBgn0043903	dome	1.45573	7.05075e-35
FBgn0038881	aus	1.45566	9.47031e-05
FBgn0260938	tay	1.45527	1.08532e-48
FBgn0086671	snoRNA:Ψ28S-2876	1.45515	3.06103e-06
FBgn0035617	l(3)psg2	1.45429	5.78608e-29
FBgn0010549	l(2)03659	1.4532	1.51807e-07
FBgn0283499	InR	1.45204	2.46372e-23
FBgn0264449	CG43867	1.45084	2.71081e-26
FBgn0260970	Ubr3	1.44936	8.72124e-39
FBgn0035437	Strip	1.44916	7.18353e-122
FBgn0033113	Spn42Dc	1.44704	0.000135035
FBgn0038247	Cad88C	1.44645	1.16344e-08
FBgn0086655	jing	1.44594	5.6485e-23
FBgn0051755	SoYb	1.44567	1.45388e-80
FBgn0003862	trx	1.44464	2.86528e-31
FBgn0004860	ph-d	1.44458	1.55321e-35
FBgn0000635	Fas2	1.44221	3.16924e-05
FBgn0087012	5-HT2A	1.44183	3.20244e-09
FBgn0259927	CG42450	1.44162	1.30803e-14
FBgn0039528	dsd	1.44136	5.24706e-27
FBgn0025186	ari-2	1.44106	5.79294e-102
FBgn0020251	sfl	1.44082	3.01444e-25
FBgn0034590	Magi	1.44036	2.3378e-39
FBgn0261260	mgl	1.43513	5.41738e-09
FBgn0285896	btl	1.43472	1.50247e-05
FBgn0263236	SP1029	1.43429	3.57795e-08
FBgn0046704	Liprin-α	1.43393	3.09912e-29
FBgn0039282	Bili	1.43384	0.000319498
FBgn0085434	NaCP60E	1.43364	5.32776e-11
FBgn0287775	18w	1.43228	7.83668e-15
FBgn0020621	Pkn	1.43226	7.46164e-36
FBgn0002543	robo2	1.43214	1.33459e-11
FBgn0030600	hiw	1.43186	3.68003e-07
FBgn0032940	Mondo	1.43093	5.19115e-57
FBgn0034733	CG4752	1.4276	2.88599e-61
FBgn0016070	smg	1.42569	1.13082e-37
FBgn0283427	FASN1	1.42528	1.39251e-29
FBgn0003892	ptc	1.4252	1.20284e-18
FBgn0000721	for	1.42124	1.19302e-65
FBgn0030766	mthl1	1.42022	6.84121e-25
FBgn0066101	LpR1	1.4192	1.74077e-25
FBgn0026160	tna	1.41817	7.40573e-15
FBgn0036715	Cad74A	1.41791	5.7426e-23
FBgn0029728	CG2861	1.41782	1.65756e-10
FBgn0265182	CG44247	1.41717	2.50049e-10
FBgn0003464	sol	1.41702	6.97954e-45
FBgn0024150	Ac78C	1.41561	2.03677e-22
FBgn0035420	hob	1.4156	5.73944e-21
FBgn0003053	peb	1.41531	5.87315e-14
FBgn0010905	Spn	1.41524	2.2724e-06
FBgn0003483	spn-E	1.41468	1.48438e-34
FBgn0024234	gbb	1.41105	3.78893e-05
FBgn0003486	spo	1.411	9.32729e-08
FBgn0263968	nonC	1.4108	2.32184e-30
FBgn0037025	Spc105R	1.41035	4.56159e-56
FBgn0031016	kek5	1.40989	1.28405e-19
FBgn0026598	Apc2	1.40913	1.30921e-28
FBgn0003016	osp	1.40731	3.80358e-36
FBgn0029157	ssh	1.40681	9.58201e-47
FBgn0043456	Ndf	1.40599	4.22886e-73
FBgn0030318	rho-4	1.40566	9.78055e-14
FBgn0036791	CG7271	1.40566	1.34493e-22
FBgn0266580	Gp210	1.40441	3.98143e-11
FBgn0051357	Kaz	1.40288	4.58148e-26
FBgn0261261	plx	1.40198	5.85109e-26
FBgn0034060	Tmem131	1.40103	2.58132e-21
FBgn0037143	CR7448	1.40068	3.53758e-05
FBgn0036287	CG10663	1.40036	4.53388e-08
FBgn0032208	Ufd4	1.39949	1.22045e-26
FBgn0037093	Cdk12	1.39864	1.20245e-30
FBgn0013763	Idgf6	1.39786	7.82693e-05
FBgn0264953	Piezo	1.39739	1.1372e-29
FBgn0035766	eco	1.39734	1.84213e-35
FBgn0035073	CG16896	1.39688	8.43496e-61
FBgn0259168	mnb	1.3966	1.57907e-64
FBgn0259214	PMCA	1.39604	1.61524e-08
FBgn0052218	lncRNA:CR32218	1.39481	9.34025e-29
FBgn0037074	Tbc1d8-9	1.39453	1.23982e-35
FBgn0019990	Gcn2	1.39423	2.12106e-83
FBgn0030680	CG8944	1.39417	1.41666e-83
FBgn0037918	CG6791	1.39406	2.32208e-44
FBgn0032817	CG10631	1.3928	3.00448e-21
FBgn0001316	klar	1.39213	1.29247e-29
FBgn0261859	CG42788	1.39165	3.11987e-20
FBgn0038324	CG5038	1.39102	1.13748e-19
FBgn0250867	CG42238	1.38743	1.2868e-18
FBgn0038816	Lrrk	1.3851	8.12885e-42
FBgn0263289	scrib	1.38443	1.43235e-38
FBgn0003448	sna	1.38415	1.0708e-13
FBgn0265276	l(3)neo38	1.38375	6.46548e-11
FBgn0288310	mv	1.38354	1.00099e-20
FBgn0000163	baz	1.38169	2.52819e-35
FBgn0010303	hep	1.38115	2.34677e-48
FBgn0035625	Blimp-1	1.38099	1.57969e-09
FBgn0026401	Nipped-B	1.38092	1.25269e-12
FBgn0262867	Ptr	1.38009	2.3254e-18
FBgn0025627	CG4194	1.38001	1.03365e-05
FBgn0039026	CG7029	1.37871	3.22636e-17
FBgn0029123	SoxN	1.37816	3.98176e-19
FBgn0027588	GCS2α	1.37805	1.59613e-09
FBgn0034408	sano	1.37491	0.000309372
FBgn0050089	CG30089	1.3748	3.64373e-18
FBgn0004456	mew	1.37368	2.62616e-12
FBgn0031051	Ranbp21	1.37352	5.13202e-46
FBgn0259244	CG42342	1.37332	5.44817e-07
FBgn0262614	pyd	1.37318	2.50565e-33
FBgn0266557	kis	1.37296	5.28793e-16
FBgn0039004	Nup133	1.3727	7.7218e-23
FBgn0261385	scra	1.37245	3.08357e-05
FBgn0031759	Kdm5	1.37118	1.65109e-26
FBgn0023508	Ocrl	1.36996	9.64554e-38
FBgn0025641	DAAM	1.36973	8.21802e-27
FBgn0003326	sca	1.36837	8.41817e-14
FBgn0031959	spz3	1.36762	0.000110807
FBgn0031401	papi	1.36758	4.90206e-15
FBgn0010328	woc	1.36756	1.07822e-34
FBgn0031251	CG4213	1.36663	1.04077e-05
FBgn0267104	CG45544	1.3661	2.78598e-09
FBgn0028371	jbug	1.36599	8.03302e-18
FBgn0037379	CG10979	1.36557	2.23246e-42
FBgn0263855	BubR1	1.36557	1.22318e-25
FBgn0035848	Uxs	1.365	1.1255e-12
FBgn0032256	RluA-2	1.36466	3.71831e-26
FBgn0038478	cal1	1.36388	2.23433e-38
FBgn0264305	CG43783	1.36371	3.77385e-35
FBgn0085413	CG34384	1.36358	0.000192471
FBgn0035145	MED14	1.36322	1.17708e-50
FBgn0263705	Myo10A	1.36318	3.05105e-11
FBgn0001138	grn	1.363	5.23672e-08
FBgn0005631	robo1	1.36179	1.19022e-05
FBgn0051678	CG31678	1.36168	5.40085e-18
FBgn0259140	Cubn2	1.36161	7.81689e-06
FBgn0031170	Abca3	1.36158	2.08905e-17
FBgn0011286	RyR	1.36109	0.000109024
FBgn0029504	CHES-1-like	1.35933	3.25612e-28
FBgn0015589	Apc	1.35929	2.14071e-25
FBgn0026313	X11L	1.35866	4.13653e-29
FBgn0034734	CG4554	1.35774	1.05354e-29
FBgn0000119	arr	1.35567	6.62008e-14
FBgn0003041	pbl	1.35517	1.12684e-56
FBgn0034253	CG10936	1.355	7.05953e-19
FBgn0027575	GABA-B-R2	1.35354	1.61791e-05
FBgn0051118	RabX4	1.35346	3.93603e-15
FBgn0038547	CG17803	1.35307	1.10574e-27
FBgn0014141	cher	1.35205	2.03767e-19
FBgn0034540	Lrt	1.35065	2.44003e-08
FBgn0045063	fdl	1.34911	2.6508e-14
FBgn0000629	E(z)	1.34888	4.88818e-27
FBgn0259677	CG42346	1.34887	3.62174e-10
FBgn0023213	eIF4G1	1.34849	1.13866e-19
FBgn0004102	oc	1.34846	2.1612e-09
FBgn0039862	kek6	1.34743	3.33931e-18
FBgn0032957	CG2225	1.34699	9.49292e-19
FBgn0039623	CG1951	1.34595	3.16154e-13
FBgn0010225	Gel	1.34567	1.99403e-10
FBgn0003415	skd	1.34559	1.43557e-19
FBgn0001624	dlg1	1.34505	7.50529e-35
FBgn0005386	ash1	1.34423	4.20977e-25
FBgn0029761	SK	1.3428	0.000134057
FBgn0051619	nolo	1.34269	2.70482e-06
FBgn0266083	ocm	1.34219	1.41389e-20
FBgn0004396	CrebA	1.34208	1.47936e-05
FBgn0027596	Kank	1.34061	2.16023e-18
FBgn0003210	rb	1.34025	4.99181e-81
FBgn0029840	raptor	1.34016	2.37126e-21
FBgn0261823	Asx	1.33988	5.74078e-56
FBgn0037327	PEK	1.33978	5.3916e-27
FBgn0260486	Ziz	1.33957	1.42057e-27
FBgn0004373	fwd	1.3379	4.2024e-37
FBgn0262719	CG43163	1.33773	1.72542e-20
FBgn0000395	cv-2	1.33705	1.84544e-15
FBgn0005198	gig	1.33696	3.38781e-28
FBgn0260462	CtsF	1.33688	0.000106956
FBgn0085424	nub	1.33672	5.52195e-10
FBgn0011592	fra	1.33606	4.75972e-25
FBgn0010194	Wnt5	1.33517	1.70318e-14
FBgn0000247	ca	1.33427	5.40866e-51
FBgn0261563	wb	1.33294	3.35151e-12
FBgn0004368	Ptp4E	1.33271	1.87928e-36
FBgn0041582	tamo	1.33205	3.6612e-28
FBgn0034570	CG10543	1.33203	4.30074e-26
FBgn0039923	MED26	1.33083	1.47777e-15
FBgn0036494	Toll-6	1.32942	1.47962e-07
FBgn0250786	Chd1	1.32925	7.92909e-67
FBgn0040505	Alk	1.32919	0.000218558
FBgn0023001	melt	1.3291	6.41701e-14
FBgn0033159	Dscam1	1.32776	1.67329e-19
FBgn0037831	Cap-H2	1.32739	5.84032e-39
FBgn0028875	nAChRα5	1.32631	1.27396e-05
FBgn0041605	cpx	1.3261	1.04164e-06
FBgn0030660	CG8097	1.32602	5.54879e-36
FBgn0032456	MRP	1.32459	1.7169e-23
FBgn0000140	asp	1.32448	4.14524e-48
FBgn0004607	zfh2	1.32067	1.70497e-07
FBgn0033061	SmydA-5	1.32047	0.000811835
FBgn0050372	Asap	1.31848	5.05403e-57
FBgn0011747	Ank	1.31829	7.9349e-26
FBgn0039727	Vps13B	1.31749	3.01443e-31
FBgn0032398	CG6766	1.31725	7.96053e-07
FBgn0265082	Cdep	1.31502	4.86001e-12
FBgn0000479	dnc	1.31486	7.61769e-22
FBgn0039501	TTLL6B	1.31314	2.57592e-09
FBgn0031698	Ncoa6	1.31289	2.87389e-27
FBgn0003277	Polr2A	1.31278	1.92239e-40
FBgn0022768	Pp2C1	1.31062	3.36585e-30
FBgn0261244	inaE	1.31058	1.30105e-33
FBgn0036043	Ae2	1.31032	2.44421e-22
FBgn0039863	CG1815	1.30822	3.93381e-21
FBgn0259228	C3G	1.30783	1.86565e-39
FBgn0004583	ex	1.30636	5.77627e-15
FBgn0027548	nito	1.30399	1.24673e-55
FBgn0038621	CG10864	1.30377	0.000292597
FBgn0016081	fry	1.30351	3.08023e-18
FBgn0040236	c11.1	1.30281	6.49788e-31
FBgn0085400	side-V	1.30158	2.45872e-07
FBgn0014133	bif	1.30082	3.46259e-38
FBgn0000723	FER	1.30039	1.02525e-11
FBgn0032796	cyst	1.30011	2.43082e-54
FBgn0003292	rt	1.30001	1.80848e-26
FBgn0036294	CG10654	1.29959	1.6971e-26
FBgn0015269	Nf1	1.2995	1.03536e-43
FBgn0052451	SPoCk	1.29905	1.60993e-12
FBgn0035956	Doc2	1.29899	4.77354e-09
FBgn0002891	PolZ1	1.29792	1.87829e-22
FBgn0050069	Sdb	1.29687	7.42501e-06
FBgn0266696	Svil	1.29508	3.93474e-61
FBgn0030930	Pgant7	1.29388	4.16066e-24
FBgn0029997	CG2258	1.29245	1.92603e-34
FBgn0001965	Sos	1.2921	2.63204e-38
FBgn0261963	mid	1.29128	5.66606e-16
FBgn0038320	Cyfip	1.29002	6.45768e-35
FBgn0026713	Prp16	1.28964	9.86966e-28
FBgn0031420	Atxn7	1.28915	2.69407e-47
FBgn0267488	Mcr	1.28789	4.183e-17
FBgn0037063	CG9391	1.28783	8.00894e-22
FBgn0033661	CG13185	1.28774	1.07666e-19
FBgn0003475	spir	1.28686	8.44748e-48
FBgn0259745	wech	1.28514	2.40364e-21
FBgn0259170	α-Man-Ia	1.28508	2.02979e-12
FBgn0083969	CG34133	1.28435	9.61655e-26
FBgn0261797	Dhc64C	1.2843	2.34641e-19
FBgn0259242	CG42340	1.28425	3.25994e-07
FBgn0000117	arm	1.28324	2.69579e-50
FBgn0029939	CG9650	1.28239	1.915e-08
FBgn0011723	byn	1.28237	1.1364e-20
FBgn0014388	sty	1.28218	1.88154e-06
FBgn0003525	stg	1.2818	5.14859e-36
FBgn0261647	Axud1	1.28018	8.44364e-44
FBgn0034300	CG5098	1.27953	3.26882e-43
FBgn0022710	Ac13E	1.27935	5.16435e-08
FBgn0083956	CG34120	1.27866	1.62542e-11
FBgn0001250	if	1.27853	6.53668e-14
FBgn0085436	Not1	1.27837	2.11445e-31
FBgn0001330	kz	1.27822	6.81423e-83
FBgn0020279	lig	1.27745	2.8454e-25
FBgn0039831	CG12054	1.27635	1.10442e-47
FBgn0052533	CG32533	1.27621	1.70377e-24
FBgn0020377	Sr-CII	1.2761	8.51532e-06
FBgn0085370	Pde11	1.27449	1.10077e-25
FBgn0263352	Unr	1.27328	1.17545e-18
FBgn0260748	CG5004	1.27318	2.57536e-43
FBgn0001987	Gli	1.27314	3.519e-12
FBgn0034606	ASPP	1.27303	1.55826e-19
FBgn0040273	Spt5	1.27187	1.47989e-13
FBgn0035497	CG14995	1.2717	1.63124e-20
FBgn0030486	Set2	1.27116	5.42676e-23
FBgn0260789	mxc	1.27107	1.83683e-70
FBgn0031488	Ccdc85	1.27093	2.19502e-06
FBgn0015477	Rme-8	1.27065	4.10834e-33
FBgn0034249	RhoGAP54D	1.27022	2.8506e-92
FBgn0003175	px	1.27015	2.13486e-21
FBgn0037541	CG2747	1.27007	5.89542e-36
FBgn0265778	PDZ-GEF	1.26964	8.45092e-27
FBgn0020370	TppII	1.26838	2.4076e-24
FBgn0039056	CenB1A	1.26831	2.75938e-42
FBgn0261822	Bsg	1.26811	1.42943e-07
FBgn0000382	csw	1.26688	9.20346e-29
FBgn0031673	CG31650	1.26605	1.81696e-08
FBgn0262509	nrm	1.26517	2.80308e-09
FBgn0034110	Atg9	1.26513	4.24817e-13
FBgn0003656	sws	1.26451	7.29116e-29
FBgn0003396	shn	1.26449	7.80331e-27
FBgn0004367	mei-41	1.26296	1.04652e-18
FBgn0261648	salm	1.26212	3.01135e-24
FBgn0259211	grh	1.26132	4.76582e-13
FBgn0035023	ITP	1.26117	2.13491e-05
FBgn0036913	Usp32	1.26047	6.32336e-25
FBgn0086444	l(2)37Cb	1.25941	1.09301e-33
FBgn0039590	CG10011	1.25939	1.70377e-24
FBgn0031216	Zir	1.25875	1.38651e-18
FBgn0037142	CG14562	1.25856	2.03767e-19
FBgn0032018	CG7806	1.25845	8.09706e-19
FBgn0043362	bchs	1.25808	1.85555e-20
FBgn0263974	qin	1.25768	2.43521e-23
FBgn0264894	CG44085	1.2572	2.90786e-05
FBgn0039738	Mgat2	1.25651	2.01671e-05
FBgn0034618	CG9485	1.2528	2.35218e-23
FBgn0029688	lva	1.25222	1.37221e-28
FBgn0015399	kek1	1.25067	7.72851e-06
FBgn0026577	CG8677	1.25004	1.66999e-09
FBgn0051224	CG31224	1.24979	2.60168e-26
FBgn0029834	CG5937	1.24937	8.41034e-05
FBgn0035983	CG4080	1.24815	1.1248e-19
FBgn0265630	sno	1.24688	6.44112e-49
FBgn0001180	hb	1.24484	3.12854e-28
FBgn0033460	Sec24AB	1.24292	8.96707e-34
FBgn0038286	CG6966	1.24291	2.26445e-36
FBgn0287864	hbs	1.24254	0.000731254
FBgn0030809	Ubr1	1.24045	7.41332e-38
FBgn0050085	Rif1	1.24012	2.64799e-58
FBgn0267665	lncRNA:CR46003	1.23885	0.000374984
FBgn0035542	DOR	1.23778	0.00088929
FBgn0036150	Ir68a	1.23742	4.54868e-07
FBgn0003900	twi	1.23712	3.83077e-14
FBgn0004390	RasGAP1	1.23627	1.14755e-33
FBgn0033052	SCAP	1.23557	4.96932e-23
FBgn0053207	pxb	1.23523	4.47142e-10
FBgn0005624	Psc	1.23449	8.85659e-23
FBgn0051729	CG31729	1.23437	8.85655e-15
FBgn0261698	SLO2	1.23399	7.55056e-24
FBgn0259111	Ndae1	1.23389	5.95717e-08
FBgn0085376	CG34347	1.2338	2.17945e-06
FBgn0010434	cora	1.23296	2.41241e-13
FBgn0032800	CG10137	1.23156	1.21842e-05
FBgn0034797	nahoda	1.23118	1.7479e-05
FBgn0266418	wake	1.23047	4.15118e-32
FBgn0003866	tsh	1.23008	4.1083e-17
FBgn0267487	Ptp61F	1.22711	1.53037e-59
FBgn0004598	Fur2	1.22703	8.39517e-23
FBgn0021760	chb	1.22699	3.1303e-22
FBgn0259823	CG42404	1.22699	5.60805e-08
FBgn0259176	bun	1.22589	4.00672e-39
FBgn0036882	CG9279	1.22573	5.11129e-19
FBgn0052702	Cubn	1.22379	2.83373e-15
FBgn0259785	pzg	1.22358	9.97433e-36
FBgn0010389	htl	1.22352	7.36401e-10
FBgn0044028	Notum	1.22233	3.73496e-05
FBgn0261674	CG42709	1.22226	4.89784e-13
FBgn0025815	Mcm6	1.22224	1.22286e-44
FBgn0031879	uif	1.22206	1.27167e-07
FBgn0043900	pygo	1.22192	6.56636e-39
FBgn0035264	Oseg4	1.22163	1.5496e-05
FBgn0000008	a	1.21975	2.9214e-26
FBgn0035099	CG6845	1.21885	0.000380292
FBgn0031632	CG15628	1.2188	1.69971e-13
FBgn0263930	dally	1.21812	0.000141294
FBgn0032452	CG15484	1.21789	9.65123e-08
FBgn0038344	obe	1.21754	1.41292e-16
FBgn0003896	tup	1.21736	1.92076e-11
FBgn0002926	ndl	1.21721	2.22032e-07
FBgn0034073	CG8414	1.21702	5.76546e-14
FBgn0025725	αCOP	1.21686	2.8126e-84
FBgn0039602	CG1647	1.21505	1.07155e-76
FBgn0039207	Cftr	1.21332	1.74825e-15
FBgn0039559	NSD	1.21298	6.60785e-28
FBgn0266717	Bruce	1.2118	7.50645e-12
FBgn0031762	CG9098	1.21069	7.28116e-06
FBgn0028509	CenG1A	1.21054	2.28982e-18
FBgn0024921	Tnpo	1.21016	4.23492e-19
FBgn0052982	CG32982	1.20924	1.56369e-29
FBgn0263048	Gpdh3	1.20911	1.00024e-42
FBgn0259227	CG42327	1.20902	6.75046e-23
FBgn0261794	kcc	1.20874	2.01273e-12
FBgn0037116	Als2	1.20841	1.00609e-51
FBgn0260794	ctrip	1.20828	5.43421e-19
FBgn0037949	prd1	1.20721	1.60367e-26
FBgn0033246	ACC	1.2069	2.39628e-23
FBgn0001325	Kr	1.20482	7.7459e-11
FBgn0263747	CG43672	1.20428	4.09366e-14
FBgn0262103	Sik3	1.20328	3.90539e-20
FBgn0284084	wg	1.20311	2.82874e-10
FBgn0037213	CG12581	1.20294	7.17544e-25
FBgn0010651	MFS14	1.20253	1.27681e-05
FBgn0267336	Glut4EF	1.20238	2.6554e-06
FBgn0003189	r	1.20058	2.94693e-15
FBgn0035842	Setx	1.20004	1.00354e-30
FBgn0002709	mei-218	1.19991	0.000321857
FBgn0000416	Sap-r	1.19909	2.80024e-06
FBgn0085450	Snoo	1.19787	2.96541e-20
FBgn0051635	CG31635	1.19712	3.07595e-22
FBgn0004512	Mdr49	1.19639	2.99397e-23
FBgn0031006	rictor	1.19511	1.85016e-34
FBgn0032475	Sfmbt	1.19456	3.23297e-30
FBgn0033212	LRR	1.1942	6.28375e-68
FBgn0037943	CG14722	1.19388	5.8846e-41
FBgn0024555	flfl	1.19207	9.63642e-21
FBgn0030946	CG6659	1.19101	9.78855e-15
FBgn0267408	AOX1	1.19099	1.02583e-34
FBgn0041171	ago	1.19081	4.84271e-28
FBgn0039908	Asator	1.19016	3.71595e-29
FBgn0031258	CG4297	1.18925	9.87386e-05
FBgn0027795	CG14785	1.1882	8.83464e-05
FBgn0000719	fog	1.18801	9.04314e-18
FBgn0021761	Nup154	1.1878	2.52178e-15
FBgn0041150	hoe1	1.18736	6.6032e-20
FBgn0083977	CG34141	1.18672	3.65152e-05
FBgn0031799	Pez	1.18587	5.07045e-18
FBgn0261554	CG42672	1.1857	1.43233e-20
FBgn0000166	bcd	1.18567	1.06928e-06
FBgn0031745	rau	1.18522	8.75256e-06
FBgn0000014	abd-A	1.185	0.000203353
FBgn0038504	Sur-8	1.18299	3.1638e-50
FBgn0053182	Kdm4B	1.18258	1.42197e-28
FBgn0284435	tyn	1.18248	3.88352e-09
FBgn0010382	CycE	1.18232	1.59939e-77
FBgn0033889	CG6701	1.18124	6.10602e-41
FBgn0035262	CG18171	1.18109	4.24289e-08
FBgn0034277	OstΔ	1.18108	2.15331e-08
FBgn0000015	Abd-B	1.18056	0.000901847
FBgn0052654	Sec16	1.17896	2.83429e-21
FBgn0032363	Dlg5	1.17847	2.82128e-18
FBgn0004875	enc	1.17758	1.09565e-30
FBgn0019650	toy	1.17626	4.03363e-08
FBgn0266801	CG45263	1.17604	1.1861e-06
FBgn0026239	gukh	1.17318	6.72693e-32
FBgn0259171	Pde9	1.17282	4.53292e-10
FBgn0265274	Inx3	1.1713	1.45924e-07
FBgn0032156	CG13124	1.17091	0.000186144
FBgn0261793	Trf2	1.16951	9.68951e-42
FBgn0023416	Ac3	1.16807	1.2959e-08
FBgn0010909	msn	1.16736	7.1144e-45
FBgn0264001	bru3	1.16615	0.000200716
FBgn0031536	Cog3	1.16592	3.6968e-12
FBgn0041182	Tep2	1.1646	0.000270582
FBgn0026083	tyf	1.16452	2.60354e-51
FBgn0034720	Liprin-γ	1.16418	4.38371e-12
FBgn0004118	nAChRβ2	1.16396	7.90464e-07
FBgn0267790	rump	1.1628	1.37425e-16
FBgn0286788	Orc1	1.1626	7.82112e-19
FBgn0266917	Sf3a1	1.16133	9.26064e-56
FBgn0039944	CG17162	1.16082	1.70226e-14
FBgn0010452	trn	1.16072	1.90355e-11
FBgn0028579	phtf	1.1596	1.45287e-29
FBgn0005558	ey	1.15954	9.79269e-06
FBgn0030941	wgn	1.15951	0.000793978
FBgn0030812	wcy	1.15943	2.6881e-43
FBgn0024277	trio	1.159	5.19374e-12
FBgn0034009	CG8155	1.15823	1.92453e-32
FBgn0032517	CG7099	1.15776	4.89412e-12
FBgn0266719	stac	1.1561	2.02756e-09
FBgn0025639	Hmt4-20	1.15497	8.63138e-64
FBgn0040397	CG3655	1.15351	6.50919e-13
FBgn0025741	PlexA	1.15348	1.41288e-08
FBgn0038934	Gld2	1.1525	9.87476e-07
FBgn0260639	γTub23C	1.15169	2.96439e-40
FBgn0026597	Axn	1.15101	2.9279e-28
FBgn0283503	Neurl4	1.1498	1.9524e-17
FBgn0052113	Vps13D	1.14957	2.02075e-18
FBgn0004387	Klp98A	1.14942	1.12206e-40
FBgn0002906	Blm	1.14926	1.57331e-20
FBgn0261461	RhoGAP18B	1.14818	2.23672e-21
FBgn0000097	aop	1.14797	7.05255e-13
FBgn0052227	gogo	1.14722	1.53399e-13
FBgn0015609	CadN	1.14707	4.04441e-14
FBgn0261547	Exn	1.1468	1.45993e-27
FBgn0003520	stau	1.14625	9.01864e-26
FBgn0003416	sl	1.14622	8.46541e-26
FBgn0004611	Plc21C	1.14583	4.22022e-15
FBgn0028789	Doc1	1.14567	1.44343e-11
FBgn0036732	Oatp74D	1.14521	0.00014775
FBgn0031683	CG4230	1.14504	6.24983e-50
FBgn0015360	oxt	1.1448	3.09654e-17
FBgn0021776	mira	1.14349	3.28383e-21
FBgn0004837	Su(H)	1.14349	3.39369e-25
FBgn0000180	bib	1.14311	8.26425e-13
FBgn0037218	aux	1.1429	3.58452e-46
FBgn0014135	bnl	1.14212	0.000962
FBgn0001150	gt	1.14211	7.21963e-09
FBgn0014037	Su(Tpl)	1.14119	1.52214e-44
FBgn0260945	Atg1	1.1388	4.32649e-47
FBgn0052062	Rbfox1	1.13851	4.26352e-16
FBgn0086613	Ino80	1.13842	1.82401e-26
FBgn0260005	wtrw	1.13783	3.98484e-07
FBgn0039928	Cals	1.13766	3.79538e-06
FBgn0004650	fs(1)N	1.13746	2.07967e-26
FBgn0259173	corn	1.13742	8.45092e-27
FBgn0052791	DIP-α	1.13698	2.13742e-10
FBgn0036186	CG6071	1.13638	2.16867e-08
FBgn0034072	Dg	1.13633	3.99224e-21
FBgn0286785	scb	1.13591	1.15182e-06
FBgn0020412	JIL-1	1.13578	2.77483e-12
FBgn0039227	polybromo	1.13541	4.62678e-09
FBgn0266129	lov	1.13429	3.64427e-16
FBgn0262714	Sap130	1.13319	1.41096e-32
FBgn0283741	prage	1.13235	2.4621e-14
FBgn0041604	dlp	1.13151	1.91817e-15
FBgn0030268	Klp10A	1.131	5.26378e-28
FBgn0259108	futsch	1.13039	3.01091e-06
FBgn0085432	pan	1.12994	6.83804e-18
FBgn0010415	Sdc	1.12932	3.27457e-08
FBgn0261802	CG42748	1.12836	3.10541e-31
FBgn0039431	plum	1.12753	3.91065e-13
FBgn0026206	mei-P26	1.12748	6.39285e-25
FBgn0284243	βTub56D	1.12674	4.29661e-13
FBgn0086681	Mst36Fa	1.12638	0.000206924
FBgn0014163	fax	1.12497	3.29123e-19
FBgn0261984	Ire1	1.12466	1.88665e-14
FBgn0014343	mirr	1.12422	3.0127e-05
FBgn0288229	CG3164	1.12422	3.83836e-06
FBgn0031872	ihog	1.124	3.32672e-09
FBgn0000319	Chc	1.1227	2.96044e-25
FBgn0004648	svr	1.12134	1.76361e-13
FBgn0004666	sim	1.1207	5.78901e-08
FBgn0034742	CG4294	1.12058	8.3385e-19
FBgn0034988	cN-IIIB	1.12052	3.32375e-16
FBgn0020261	pcm	1.12003	7.43854e-26
FBgn0039240	CG3744	1.11929	4.48997e-24
FBgn0033657	Sln	1.11896	3.11485e-06
FBgn0039182	Rrp5	1.11873	7.71784e-44
FBgn0263933	ebi	1.11813	2.3157e-34
FBgn0036463	Reck	1.11697	2.62931e-05
FBgn0004509	Fur1	1.11674	1.25811e-19
FBgn0051973	Cda5	1.11669	0.00010037
FBgn0260400	elav	1.11586	8.58159e-05
FBgn0051158	Efa6	1.1155	1.2636e-30
FBgn0262871	lute	1.11541	1.55633e-17
FBgn0000541	E(bx)	1.11509	1.46084e-23
FBgn0002973	numb	1.11379	6.69679e-23
FBgn0032454	CG5787	1.11344	4.14079e-48
FBgn0263111	cac	1.11253	5.29488e-19
FBgn0019968	Khc-73	1.11128	2.60275e-31
FBgn0085443	spri	1.11085	3.61572e-17
FBgn0264598	PsGEF	1.11081	2.26443e-06
FBgn0031574	TTLL4B	1.11079	3.67333e-10
FBgn0035410	MnM	1.11055	1.11997e-05
FBgn0051510	CG31510	1.11044	7.90766e-20
FBgn0029763	Usp16-45	1.10929	9.90977e-25
FBgn0033766	Nup188	1.10864	7.01089e-18
FBgn0036980	RhoBTB	1.10771	6.46478e-33
FBgn0262081	Csk	1.10729	3.82316e-61
FBgn0031030	Tao	1.10578	1.13921e-58
FBgn0035793	CG7546	1.10533	1.92556e-28
FBgn0029175	sotv	1.10343	2.70709e-06
FBgn0030505	NFAT	1.10272	7.07362e-49
FBgn0032629	beat-IIIc	1.10217	0.000776073
FBgn0001189	hfw	1.10066	5.39148e-10
FBgn0033450	Lsm11	1.10055	1.81637e-14
FBgn0035802	Pura	1.09985	1.27071e-16
FBgn0037443	Dmtn	1.09783	1.14077e-37
FBgn0000053	Gart	1.0944	1.15869e-22
FBgn0051721	Trim9	1.09341	3.52932e-12
FBgn0011737	Wee1	1.09251	3.04089e-36
FBgn0087007	bbg	1.09242	9.37283e-08
FBgn0030243	CG2186	1.09007	5.52261e-38
FBgn0263929	jvl	1.0887	2.73055e-13
FBgn0026428	HDAC6	1.08866	9.28851e-27
FBgn0262519	Mi-2	1.08846	7.55128e-18
FBgn0025802	Sbf	1.08815	1.33484e-20
FBgn0039419	CG12290	1.08701	0.000158228
FBgn0085437	CG34408	1.08678	7.1298e-17
FBgn0262117	IntS3	1.08654	9.7346e-19
FBgn0034021	CG8180	1.08614	6.36083e-09
FBgn0000659	fkh	1.0861	1.19844e-06
FBgn0029941	CG1677	1.08548	5.47369e-08
FBgn0004893	bowl	1.08451	0.000333514
FBgn0262109	lncRNA:CR42862	1.08446	1.67454e-12
FBgn0030263	CG2076	1.08392	2.66587e-27
FBgn0263113	Cc2d2a	1.08321	0.000560757
FBgn0002774	mle	1.08301	7.62428e-29
FBgn0027532	CG7139	1.08209	1.1937e-45
FBgn0023511	Edem1	1.0817	4.88876e-13
FBgn0035622	TM9SF3	1.08167	2.68417e-05
FBgn0004463	Polr3B	1.08139	4.04299e-41
FBgn0260933	rempA	1.08109	1.83409e-14
FBgn0033155	Br140	1.0801	1.33322e-38
FBgn0260243	E(var)3-9	1.07978	2.5752e-27
FBgn0278608	Dsp1	1.07931	9.69314e-18
FBgn0015600	toc	1.07924	1.30722e-27
FBgn0005632	faf	1.0771	2.84299e-28
FBgn0035267	CG13921	1.076	1.8369e-18
FBgn0085446	CG34417	1.07583	4.45865e-05
FBgn0038566	bard	1.07522	4.46937e-07
FBgn0039338	XNP	1.07463	2.04647e-28
FBgn0027602	CG8611	1.07417	4.34907e-38
FBgn0026679	IntS4	1.07367	1.35368e-28
FBgn0037530	EMC1	1.07362	4.76542e-11
FBgn0039668	Trc8	1.07314	1.46384e-26
FBgn0034271	Vps50	1.07202	3.32531e-38
FBgn0001301	kel	1.07164	0.000716511
FBgn0030674	HUWE1	1.07101	2.45168e-14
FBgn0264895	RapGAP1	1.07084	2.29151e-35
FBgn0004864	hop	1.07078	6.9264e-41
FBgn0284408	trol	1.07078	1.03686e-07
FBgn0027581	CG6191	1.06934	1.08792e-06
FBgn0030017	CG2278	1.06876	3.03665e-11
FBgn0082585	sprt	1.06655	3.35757e-09
FBgn0013576	mtd	1.06598	4.12686e-23
FBgn0000157	Dll	1.0659	4.33523e-06
FBgn0032079	CG31886	1.06563	2.68433e-12
FBgn0003891	tud	1.06532	2.03037e-14
FBgn0260634	eIF4G2	1.06526	6.95802e-25
FBgn0261532	cdm	1.06442	1.34674e-23
FBgn0263316	Mrp4	1.06435	1.8712e-06
FBgn0039466	CG5521	1.06431	2.9783e-18
FBgn0029895	CG14441	1.06331	2.75603e-29
FBgn0038721	subdued	1.0633	2.9794e-25
FBgn0003997	hid	1.06264	9.82653e-05
FBgn0015380	drl	1.06239	4.46832e-06
FBgn0033802	CG17724	1.06191	5.10948e-07
FBgn0034859	CG3520	1.06156	1.48492e-16
FBgn0032123	Oatp30B	1.06062	5.04887e-13
FBgn0261618	larp	1.05986	6.85033e-20
FBgn0030286	Gapvd1	1.05971	2.90773e-33
FBgn0036386	CG8833	1.05967	2.62373e-27
FBgn0260866	dnr1	1.05929	4.42493e-11
FBgn0003557	Su(dx)	1.05828	8.92298e-35
FBgn0263110	CG43367	1.05646	1.41902e-19
FBgn0030808	RhoGAP15B	1.05568	1.57068e-30
FBgn0014075	Uggt	1.0556	5.48648e-08
FBgn0000489	Pka-C3	1.05505	3.56782e-06
FBgn0030512	Nadsyn	1.05493	1.71407e-35
FBgn0022787	Hel89B	1.05389	8.08256e-30
FBgn0029006	Smurf	1.0537	2.46176e-49
FBgn0259166	CG42271	1.05325	1.13842e-34
FBgn0031869	CG18304	1.05321	0.000681063
FBgn0034491	Hsl	1.0531	2.40835e-22
FBgn0013810	Dhc36C	1.05266	3.70046e-13
FBgn0020497	emb	1.05204	1.45313e-24
FBgn0261545	CG42663	1.05179	0.000109737
FBgn0031608	CG15435	1.05063	1.03732e-17
FBgn0024365	CG12773	1.05037	3.48963e-27
FBgn0263706	CG43658	1.05004	6.76204e-22
FBgn0028476	Usp1	1.04801	2.07198e-15
FBgn0038274	Nup93-2	1.04764	1.49137e-42
FBgn0030089	AP-1γ	1.04748	6.63028e-25
FBgn0030974	Flacc	1.04671	4.19431e-24
FBgn0003984	vn	1.04656	2.48898e-09
FBgn0027948	msps	1.04656	2.54264e-16
FBgn0036663	CG9674	1.04647	3.03423e-15
FBgn0033855	link	1.04625	0.000448299
FBgn0004369	Ptp99A	1.04609	2.22498e-16
FBgn0264324	spg	1.04562	5.58491e-22
FBgn0011824	CG4038	1.04407	2.34289e-14
FBgn0015509	Cul1	1.04347	9.23479e-33
FBgn0027835	Dp1	1.04321	4.54103e-25
FBgn0035879	GAPcenA	1.04293	1.17069e-33
FBgn0262739	AGO1	1.04279	1.07289e-28
FBgn0004108	Nrt	1.04267	1.26499e-13
FBgn0029903	pod1	1.04236	5.15455e-34
FBgn0042085	Bap170	1.04112	4.89497e-26
FBgn0033479	PIG-N	1.04087	2.92085e-06
FBgn0261811	pico	1.04083	3.63086e-27
FBgn0031042	CG14221	1.04046	0.000445402
FBgn0083962	CG34126	1.04001	1.50482e-32
FBgn0016797	fz2	1.03845	9.00175e-15
FBgn0039920	CG11360	1.03828	2.43104e-06
FBgn0024947	NTPase	1.03614	1.22367e-23
FBgn0024248	chico	1.0359	1.74261e-46
FBgn0028500	Rich	1.03566	2.35229e-33
FBgn0000546	EcR	1.03314	2.0474e-28
FBgn0027287	Gmap	1.03287	9.39614e-38
FBgn0261383	IntS6	1.0325	6.90755e-30
FBgn0026207	mbo	1.03223	4.34362e-40
FBgn0027568	Cand1	1.03165	1.97631e-28
FBgn0004876	cdi	1.03117	5.94007e-39
FBgn0024987	ssx	1.03097	5.59854e-46
FBgn0035231	Pcyt2	1.03073	0.000756852
FBgn0036896	wnd	1.02974	2.16022e-23
FBgn0017558	Pdk	1.02956	1.68953e-24
FBgn0039260	Smg6	1.02931	1.01182e-30
FBgn0041180	Tep4	1.02754	3.50527e-05
FBgn0038269	Rrp6	1.0274	1.18637e-22
FBgn0015623	Cpr	1.02643	4.12273e-09
FBgn0004644	hh	1.02579	0.000144036
FBgn0004646	ogre	1.02405	2.08057e-06
FBgn0020257	Ppa	1.02289	1.66076e-07
FBgn0266000	CG44774	1.02271	1.22788e-11
FBgn0033814	Qsox1	1.02256	6.97935e-08
FBgn0020386	Pdk1	1.02117	4.35865e-24
FBgn0030189	CG2909	1.02106	2.29947e-18
FBgn0032120	CG33298	1.02052	6.28816e-14
FBgn0266681	asRNA:CR45171	1.01963	1.15095e-07
FBgn0037234	CG9795	1.01945	1.14863e-32
FBgn0052373	CG32373	1.01863	8.14212e-06
FBgn0026376	Rgl	1.01367	3.32044e-24
FBgn0036574	elg1	1.01343	8.95558e-32
FBgn0030716	CG9170	1.01338	1.07091e-08
FBgn0016978	snRNP-U1-70K	1.01313	1.17456e-15
FBgn0001323	knrl	1.0124	1.21995e-11
FBgn0001235	hth	1.01133	2.30029e-11
FBgn0021796	Tor	1.01103	1.64095e-27
FBgn0001105	Gβ13F	1.01076	6.42766e-34
FBgn0028491	CG2930	1.00998	3.65956e-05
FBgn0041184	Socs36E	1.00897	5.93059e-11
FBgn0037944	CG6923	1.00879	3.1772e-17
FBgn0001986	Mtr4	1.00877	2.54799e-33
FBgn0052685	ZAP3	1.00805	5.04797e-16
FBgn0002306	sas	1.00771	0.000254302
FBgn0035101	p130CAS	1.00769	0.000895473
FBgn0012037	Ance	1.00715	0.000542331
FBgn0031149	Stt3A	1.00706	5.56953e-07
FBgn0037445	CG9727	1.00695	1.25363e-16
FBgn0013799	Deaf1	1.0066	9.79554e-18
FBgn0259174	Nedd4	1.00654	1.35561e-16
FBgn0036579	Tmx3	1.00624	2.42337e-05
FBgn0264561	Glg1	1.0058	1.71227e-14
FBgn0035235	CG7879	1.00524	8.42464e-17
FBgn0260399	gwl	1.00463	1.1796e-45
FBgn0003308	ry	1.00445	3.51555e-11
FBgn0005596	yem	1.00326	9.57992e-37
FBgn0026319	Traf4	1.00324	8.69061e-10
FBgn0031606	CG15439	1.00319	8.86413e-35
FBgn0260962	pic	1.00224	9.65519e-33
FBgn0030109	CG12121	1.00204	1.44889e-05
FBgn0037556	CG9636	1.00019	1.80873e-16
FBgn0261477	slim	0.999886	3.16043e-28
FBgn0035959	CG4911	0.99936	4.15118e-32
FBgn0037897	CG5270	0.999359	6.75047e-24
FBgn0032681	CG10283	0.998725	2.91078e-07
FBgn0029830	Grip	0.998585	1.52764e-22
FBgn0286809	xmas	0.99744	4.01882e-08
FBgn0262730	dtn	0.996656	1.03348e-09
FBgn0028499	CG7985	0.996235	1.14859e-19
FBgn0003117	pnr	0.99565	1.14065e-06
FBgn0028538	Sec71	0.995318	5.5966e-24
FBgn0004956	upd1	0.992395	5.14601e-08
FBgn0030504	CG2691	0.991797	5.5118e-45
FBgn0013732	sced	0.990165	4.97068e-43
FBgn0040233	cana	0.989998	6.7882e-41
FBgn0002945	nkd	0.989909	1.35693e-10
FBgn0052666	Drak	0.989751	4.83645e-20
FBgn0027951	MTA1-like	0.989316	1.34403e-27
FBgn0001324	kto	0.988697	5.6748e-19
FBgn0000317	ck	0.988211	4.40032e-14
FBgn0037336	CG2519	0.987842	5.386e-11
FBgn0026375	RhoGAPp190	0.986391	1.61745e-13
FBgn0010352	Ogdh	0.985473	1.33429e-07
FBgn0027582	CG6230	0.985032	1.27681e-05
FBgn0260642	Antp	0.985012	4.49713e-09
FBgn0031239	CG17075	0.984998	0.00063553
FBgn0039936	Gyf	0.983967	1.00907e-13
FBgn0267002	unc-104	0.983749	1.55832e-17
FBgn0051368	CG31368	0.983746	1.67918e-13
FBgn0029067	Dd	0.983516	1.19266e-10
FBgn0283531	Duox	0.982928	2.61184e-19
FBgn0086532	Spt-I	0.982161	3.1151e-08
FBgn0034180	Ehbp1	0.981569	3.73519e-24
FBgn0053963	lncRNA:CR33963	0.981041	6.95073e-05
FBgn0025743	mbt	0.980992	1.29934e-56
FBgn0262029	d	0.980975	1.15867e-05
FBgn0030354	Upf1	0.980849	2.51872e-33
FBgn0263772	CG43689	0.979221	5.27194e-10
FBgn0037094	CG7611	0.977587	2.85759e-67
FBgn0034786	CG13531	0.977578	1.17456e-15
FBgn0000052	Pfas	0.976861	4.20948e-30
FBgn0033652	ths	0.976624	3.96997e-08
FBgn0051195	CG31195	0.976461	1.77579e-07
FBgn0002466	sti	0.973695	4.29718e-30
FBgn0003317	sax	0.973591	2.41652e-06
FBgn0034878	pita	0.97354	5.29769e-30
FBgn0002931	net	0.973465	7.72489e-06
FBgn0030642	CG15642	0.972825	0.000723047
FBgn0259818	CG42399	0.972747	1.67861e-13
FBgn0037757	CG8516	0.971121	1.74205e-15
FBgn0261238	Alh	0.970821	2.51555e-23
FBgn0015558	tty	0.970066	1.23806e-10
FBgn0004655	wapl	0.969438	4.7022e-14
FBgn0260935	Vps15	0.969394	9.19432e-32
FBgn0037000	ZnT77C	0.969162	4.70497e-07
FBgn0086898	dgo	0.968496	2.15353e-26
FBgn0024366	CG11409	0.967701	1.2899e-05
FBgn0013343	Syx1A	0.96762	2.01166e-23
FBgn0034975	enok	0.966262	7.50314e-16
FBgn0031393	CG15382	0.965988	0.000182264
FBgn0045035	tefu	0.965701	3.53892e-21
FBgn0038300	Mau2	0.965358	2.49553e-16
FBgn0263993	CG43736	0.96526	1.78829e-25
FBgn0037657	hyx	0.964945	1.93944e-13
FBgn0039113	udt	0.963966	7.57883e-05
FBgn0030087	CG7766	0.963702	4.25301e-30
FBgn0259824	Hip14	0.963113	2.47776e-12
FBgn0051999	CG31999	0.96278	5.44942e-05
FBgn0024329	Mekk1	0.962275	1.12992e-19
FBgn0051793	CG31793	0.962147	6.92302e-16
FBgn0016930	Dyrk2	0.961137	1.54233e-22
FBgn0050421	Usp15-31	0.960895	7.96743e-29
FBgn0029685	CG2938	0.958696	4.01263e-09
FBgn0013987	MAPk-Ak2	0.95863	4.60655e-35
FBgn0029525	CG18273	0.957817	5.51327e-27
FBgn0002878	mus101	0.9575	8.76378e-23
FBgn0031023	CG14200	0.957057	1.07687e-21
FBgn0265045	Strn-Mlck	0.956875	0.000446457
FBgn0263667	Lpt	0.956866	1.35607e-22
FBgn0020647	KrT95D	0.95628	3.16509e-21
FBgn0000490	dpp	0.956083	6.92775e-08
FBgn0001085	fz	0.955888	1.85748e-05
FBgn0287182	l(3)80Fj	0.955631	7.94211e-08
FBgn0010395	Itgbn	0.955154	5.7471e-05
FBgn0039187	CG6454	0.95472	9.1818e-20
FBgn0051915	CG31915	0.952805	4.16552e-15
FBgn0002905	PolQ	0.952635	8.50705e-46
FBgn0033919	CG8547	0.95216	0.000978564
FBgn0278604	dmt	0.95196	1.11329e-29
FBgn0011725	twin	0.951825	1.72319e-22
FBgn0034025	Pgant1	0.94956	2.0333e-23
FBgn0029867	CG3847	0.949373	3.28775e-15
FBgn0030057	Ppt1	0.948987	0.00018446
FBgn0039137	Epp	0.948768	1.45613e-30
FBgn0030049	Trf4-1	0.948455	8.18279e-44
FBgn0263782	Hmgcr	0.94771	5.29122e-15
FBgn0030240	CG2202	0.947231	7.48687e-22
FBgn0035060	Eps-15	0.947186	7.03623e-10
FBgn0038100	Paip2	0.947054	1.11178e-22
FBgn0036522	Phs	0.945853	2.12879e-08
FBgn0041210	HDAC4	0.944606	7.9714e-30
FBgn0087013	Karyβ3	0.944516	1.02839e-42
FBgn0034087	clu	0.943978	6.49217e-13
FBgn0011817	nmo	0.943429	1.7071e-21
FBgn0004567	slp2	0.941372	0.000378913
FBgn0029114	Tollo	0.941273	2.50055e-23
FBgn0261403	sxc	0.940099	5.02985e-13
FBgn0010280	Taf4	0.939544	6.43734e-80
FBgn0052815	CG32815	0.938923	8.41434e-05
FBgn0043458	CG12084	0.938485	9.54055e-30
FBgn0033483	egr	0.938429	5.02909e-08
FBgn0085421	Epac	0.937594	0.000948802
FBgn0261988	Gprk2	0.936458	5.13006e-21
FBgn0051849	Mgat3	0.936376	5.08869e-12
FBgn0003321	sbr	0.936346	4.72757e-24
FBgn0036368	CG10738	0.935259	1.73377e-08
FBgn0000662	fl(2)d	0.935122	1.22249e-18
FBgn0027503	CG11970	0.934605	1.23799e-25
FBgn0027603	Ulp1	0.933881	6.74895e-23
FBgn0265140	Meltrin	0.932859	9.69957e-16
FBgn0262127	kibra	0.932538	0.00014466
FBgn0086694	Bre1	0.931619	1.59019e-34
FBgn0265998	Doa	0.93065	8.44672e-10
FBgn0052000	anne	0.930121	1.72821e-07
FBgn0003285	rst	0.930039	2.99912e-10
FBgn0001078	ftz-f1	0.929832	3.07075e-13
FBgn0040071	tara	0.929462	5.44718e-08
FBgn0000578	ena	0.929299	4.67396e-25
FBgn0267037	asRNA:CR45481	0.927829	2.54948e-07
FBgn0264560	garz	0.927693	3.87358e-32
FBgn0026262	Taf3	0.927164	3.0046e-12
FBgn0034258	eIF3c	0.926962	3.80142e-23
FBgn0030034	CG10555	0.926567	1.13783e-25
FBgn0039209	REPTOR	0.926508	8.45857e-17
FBgn0263047	CG43342	0.923738	7.1368e-07
FBgn0037743	Alg12	0.923336	0.000217049
FBgn0039696	Rnb	0.923177	1.8408e-37
FBgn0027601	pdgy	0.922854	5.21883e-19
FBgn0036340	Srrm1	0.922536	4.8454e-43
FBgn0040372	G9a	0.92229	3.97581e-18
FBgn0015279	Pi3K92E	0.92181	1.11429e-25
FBgn0030344	Nrd1	0.920711	7.6874e-09
FBgn0262656	Myc	0.919837	5.31398e-11
FBgn0011224	heph	0.919563	9.49091e-15
FBgn0035227	Iml1	0.919232	3.84477e-18
FBgn0027579	mino	0.918339	1.94142e-14
FBgn0028369	kirre	0.917862	0.000654075
FBgn0015664	Dref	0.91753	1.30921e-28
FBgn0001122	Gαo	0.917432	1.22448e-16
FBgn0264307	orb2	0.916203	2.4971e-20
FBgn0261930	vnd	0.912798	3.97849e-07
FBgn0263395	hppy	0.912699	1.46639e-13
FBgn0266848	wap	0.912325	9.47258e-15
FBgn0015513	mbc	0.911284	2.2292e-17
FBgn0264962	Pcf11	0.910773	1.11621e-19
FBgn0000183	BicD	0.910753	5.39622e-22
FBgn0031540	Pif1	0.91058	1.20388e-14
FBgn0030858	IntS2	0.910283	1.95208e-21
FBgn0037236	Skp2	0.909548	3.86433e-27
FBgn0030869	Socs16D	0.908735	6.82754e-17
FBgn0261985	Ptpmeg	0.908128	2.57443e-52
FBgn0032901	sky	0.907925	2.95389e-07
FBgn0019686	lok	0.907653	4.39973e-32
FBgn0031474	CG2991	0.90707	3.19107e-11
FBgn0028341	Ptpmeg2	0.906907	9.68514e-19
FBgn0031191	Cp110	0.906825	5.28157e-11
FBgn0034075	Asph	0.906642	3.02578e-05
FBgn0261787	brun	0.905468	4.04909e-08
FBgn0033915	Snrk	0.905157	4.25563e-26
FBgn0042185	MCU	0.905153	6.07097e-07
FBgn0001087	g	0.904749	1.33783e-59
FBgn0033859	fand	0.9045	9.20235e-20
FBgn0286567	gry	0.903644	6.9187e-20
FBgn0027505	Rab3-GAP	0.902133	4.52306e-18
FBgn0011336	Stt3B	0.901966	2.83928e-09
FBgn0262734	eIF4H1	0.901309	7.17306e-12
FBgn0036396	CG17359	0.901097	3.32742e-13
FBgn0030293	CG1737	0.901065	1.34839e-26
FBgn0263256	CG43394	0.900269	3.93728e-06
FBgn0004635	rho	0.899947	1.90533e-09
FBgn0011655	Med	0.89916	2.50245e-49
FBgn0031187	Usp2	0.899095	2.02963e-20
FBgn0032295	CG12299	0.899078	2.08552e-21
FBgn0000439	Dfd	0.899017	2.75809e-05
FBgn0003209	raw	0.896531	1.11458e-24
FBgn0261938	PolrMT	0.896184	5.01487e-21
FBgn0264326	PolE1	0.895859	5.86347e-32
FBgn0053554	Nipped-A	0.894503	8.4121e-08
FBgn0263998	Ack-like	0.894429	4.92666e-34
FBgn0005612	Sox14	0.89376	0.000957375
FBgn0036305	CG10984	0.89373	1.44252e-16
FBgn0053111	CG33111	0.89298	2.68536e-12
FBgn0051992	gw	0.892662	3.84255e-22
FBgn0033738	DUBAI	0.892027	9.7676e-13
FBgn0051159	mRRF2	0.891527	5.6118e-09
FBgn0005617	msl-1	0.890728	1.23758e-10
FBgn0031643	CG3008	0.890557	1.10944e-25
FBgn0263006	SERCA	0.889856	0.000192879
FBgn0260655	l(3)76BDm	0.888723	4.32657e-20
FBgn0050440	CG30440	0.888447	8.69128e-08
FBgn0003015	osk	0.885717	6.43492e-16
FBgn0011692	pav	0.885586	6.06181e-36
FBgn0041630	Hexo1	0.885321	4.12683e-06
FBgn0033079	Fmo-2	0.885276	4.82408e-06
FBgn0011259	Sema1a	0.883875	5.94211e-12
FBgn0037028	CG3618	0.88309	1.47361e-06
FBgn0261703	gce	0.882944	0.000432321
FBgn0002413	dco	0.881791	5.47042e-15
FBgn0005642	wdn	0.881531	2.84482e-29
FBgn0086686	l(3)L1231	0.879668	2.8375e-25
FBgn0262975	cnc	0.87913	2.04418e-20
FBgn0035464	PIG-B	0.878863	7.8512e-08
FBgn0025836	RhoGAP1A	0.878714	3.67795e-25
FBgn0013997	Nrx-IV	0.878603	1.03217e-12
FBgn0052521	Mnr	0.877865	3.96307e-07
FBgn0004959	phm	0.877317	0.000161193
FBgn0026393	Or43b	0.876738	5.85547e-13
FBgn0035424	Larp4B	0.876205	1.14846e-15
FBgn0037716	Son	0.87432	5.81538e-24
FBgn0028484	Ack	0.872835	1.04224e-21
FBgn0037363	Atg17	0.872716	4.18911e-27
FBgn0029996	UbcE2H	0.87267	1.40437e-17
FBgn0038549	Nnk	0.871753	3.32301e-20
FBgn0028487	f-cup	0.871077	2.10904e-20
FBgn0033169	CG11123	0.870785	1.82743e-40
FBgn0259139	glo	0.870084	5.21549e-07
FBgn0036449	bmm	0.869082	4.86712e-22
FBgn0260397	Su(var)3-3	0.868462	1.0319e-27
FBgn0050295	Ipk1	0.868338	1.46724e-27
FBgn0261397	didum	0.868065	7.11704e-18
FBgn0002899	mus301	0.867656	9.22144e-38
FBgn0035771	Sec63	0.867342	1.06442e-10
FBgn0038968	CG12499	0.866873	1.07644e-17
FBgn0038872	Nelf-A	0.866612	2.48785e-31
FBgn0004394	pdm2	0.866075	9.31562e-06
FBgn0030847	CG12991	0.86359	6.60454e-06
FBgn0037109	MED1	0.863528	3.85446e-16
FBgn0027334	l(1)G0004	0.861553	2.12989e-09
FBgn0031390	tho2	0.861417	9.73571e-22
FBgn0039680	Cap-D2	0.860958	1.09795e-20
FBgn0264817	pre-lola-G	0.860369	4.79131e-06
FBgn0286511	Pld	0.860175	7.39198e-12
FBgn0036684	CG3764	0.859947	5.34651e-15
FBgn0261610	CG42699	0.858784	4.06285e-11
FBgn0264707	RhoGEF3	0.858596	3.32367e-16
FBgn0034501	CG13868	0.858202	4.77109e-09
FBgn0031070	CG12702	0.856725	1.65763e-16
FBgn0260936	scny	0.855966	8.80799e-30
FBgn0039914	mav	0.853692	6.91473e-11
FBgn0286051	Rexo5	0.853021	5.71225e-12
FBgn0037720	CG8312	0.852815	6.62523e-24
FBgn0020385	pug	0.852025	2.19011e-29
FBgn0031492	Prp40	0.851043	2.62454e-37
FBgn0043854	slam	0.850937	7.10899e-06
FBgn0034976	CG4049	0.850765	2.45263e-15
FBgn0032682	grnd	0.848872	0.000101809
FBgn0034982	Naa35	0.847997	2.11742e-12
FBgn0026181	Rok	0.847879	1.9718e-28
FBgn0044323	Cka	0.847551	1.944e-44
FBgn0008636	hbn	0.846786	0.000759932
FBgn0032587	CG5953	0.846213	1.65936e-25
FBgn0036402	CG6650	0.845282	2.93828e-13
FBgn0036714	CG7692	0.845223	5.75509e-15
FBgn0030520	Pdcd4	0.845157	8.65994e-20
FBgn0263144	bin3	0.844931	9.45097e-36
FBgn0031985	mon2	0.844923	1.48272e-20
FBgn0020626	Osbp	0.844896	1.15797e-23
FBgn0039186	CG5746	0.84478	4.11944e-21
FBgn0033233	Kdm4A	0.844646	2.12187e-25
FBgn0002645	Map205	0.844491	6.50107e-09
FBgn0267571	lncRNA:CR45911	0.844451	0.00041582
FBgn0051897	CG31897	0.844351	3.3073e-06
FBgn0261113	Xrp1	0.843906	0.000362033
FBgn0032051	CG13097	0.843836	1.32055e-17
FBgn0031266	Sf3b1	0.843729	0.000180266
FBgn0035001	Slik	0.843596	8.14145e-32
FBgn0087035	AGO2	0.843579	3.38758e-12
FBgn0261269	conv	0.843173	1.15572e-06
FBgn0261550	Orp8	0.842894	4.93377e-29
FBgn0085433	CG34404	0.841199	8.47691e-08
FBgn0032243	Klp31E	0.839789	2.89259e-28
FBgn0034071	CG8405	0.839162	3.29367e-19
FBgn0026060	Mipp2	0.838623	2.66895e-10
FBgn0030685	Graf	0.838614	4.19889e-12
FBgn0028577	hfp	0.838387	1.17532e-09
FBgn0052698	CARPB	0.837426	4.84558e-06
FBgn0035812	CG7457	0.837314	1.1412e-17
FBgn0033354	FANCI	0.83692	2.65124e-11
FBgn0039451	CG6420	0.836361	2.72342e-21
FBgn0034113	CG8060	0.836264	2.40999e-20
FBgn0013765	cnn	0.835591	3.54638e-22
FBgn0037792	TAF1B	0.8347	1.29802e-13
FBgn0030420	pira	0.832544	2.40922e-14
FBgn0020407	asun	0.831695	1.35526e-20
FBgn0261862	whd	0.8311	7.35094e-11
FBgn0285925	Fas1	0.830781	5.00154e-05
FBgn0029870	Marf	0.830565	3.56113e-38
FBgn0039261	Ythdf	0.830052	8.35283e-14
FBgn0029992	Upf2	0.828912	5.29199e-23
FBgn0002022	Catsup	0.828064	0.000121455
FBgn0263258	chas	0.827222	1.30377e-05
FBgn0039157	Myo95E	0.82714	5.48833e-12
FBgn0029887	CG3198	0.825687	1.97121e-12
FBgn0039631	Sirt7	0.825622	1.18807e-26
FBgn0030330	Tango10	0.825223	3.005e-15
FBgn0023510	Rbcn-3B	0.825012	1.50752e-16
FBgn0023097	bon	0.824909	2.63592e-21
FBgn0036141	wls	0.824307	0.000168859
FBgn0015949	hrg	0.82324	6.59295e-16
FBgn0037894	Ipo9	0.823191	4.74624e-34
FBgn0035266	Gk2	0.821256	3.51961e-35
FBgn0011230	poe	0.821227	8.48092e-09
FBgn0035397	PAN3	0.819566	3.11612e-21
FBgn0286070	cnk	0.818596	8.95805e-14
FBgn0032480	Edem2	0.817301	2.05977e-15
FBgn0052251	Claspin	0.817237	7.78744e-13
FBgn0036518	RhoGAP71E	0.816986	3.19735e-13
FBgn0025724	β'COP	0.816846	1.23157e-19
FBgn0015926	dah	0.816035	6.60324e-18
FBgn0051523	CG31523	0.814162	4.72883e-06
FBgn0262647	Nup160	0.813664	8.16708e-16
FBgn0029693	Cmtr1	0.81325	1.30738e-30
FBgn0033688	Prp8	0.813039	1.24075e-16
FBgn0011205	fbl	0.811597	5.62947e-16
FBgn0050011	gem	0.809872	7.4318e-23
FBgn0085423	GramD1B	0.809647	1.18617e-13
FBgn0046253	CG3502	0.808375	8.55273e-07
FBgn0264959	Src42A	0.807806	6.67961e-31
FBgn0025681	CG3558	0.807209	1.61207e-42
FBgn0266916	Cenp-C	0.80592	7.78527e-19
FBgn0263396	sqd	0.805343	1.29802e-13
FBgn0039644	rdog	0.804459	2.02096e-16
FBgn0024698	Cpsf160	0.804394	5.78473e-15
FBgn0053145	GalT1	0.804138	4.76239e-08
FBgn0041789	Pax	0.804019	2.56505e-09
FBgn0283682	Ge-1	0.803378	1.30688e-20
FBgn0030336	CG1578	0.803333	1.15196e-39
FBgn0262124	uex	0.803069	6.41001e-05
FBgn0266111	ana3	0.802769	1.42783e-12
FBgn0040080	pins	0.802494	7.64322e-27
FBgn0030631	Prp5	0.802193	2.37248e-15
FBgn0031098	CG17068	0.800771	5.8345e-20
FBgn0034181	CG8963	0.800429	1.30532e-09
FBgn0029723	Proc-R	0.800392	8.46161e-05
FBgn0020236	ATPCL	0.799925	3.00139e-20
FBgn0051015	PH4αPV	0.799655	0.000585551
FBgn0034795	MED23	0.799113	1.78539e-27
FBgn0035850	Atg18a	0.798977	3.58758e-18
FBgn0261553	CG42671	0.797003	1.95867e-33
FBgn0019938	Polr1A	0.795801	1.19266e-33
FBgn0259221	ATP8A	0.795771	1.61392e-19
FBgn0036686	CG7728	0.795265	6.13122e-10
FBgn0085478	Zdhhc8	0.795218	1.04449e-10
FBgn0000524	dx	0.793608	2.46335e-39
FBgn0030701	CG16952	0.792902	7.40847e-12
FBgn0020379	Rfx	0.792809	6.8486e-14
FBgn0000996	dup	0.791793	8.71241e-08
FBgn0067779	dbr	0.789444	8.93366e-15
FBgn0027335	Rip11	0.789375	3.86273e-25
FBgn0001341	Mybbp1A	0.787644	8.69397e-14
FBgn0010762	simj	0.786231	1.86834e-17
FBgn0034964	IntS1	0.784852	6.36831e-15
FBgn0039861	pasha	0.784365	3.37089e-14
FBgn0024510	dlt	0.78375	3.54098e-15
FBgn0004859	ci	0.783531	1.68516e-07
FBgn0250823	gish	0.783362	6.94907e-14
FBgn0052190	NUCB1	0.783316	4.53653e-05
FBgn0027108	Inx2	0.782966	7.6008e-07
FBgn0031990	PAPLA1	0.781967	7.03344e-10
FBgn0260941	app	0.781807	2.21621e-06
FBgn0035498	Fit1	0.781757	4.33694e-32
FBgn0030502	tth	0.781373	3.75257e-13
FBgn0261016	clos	0.780867	2.1747e-17
FBgn0027621	Pfrx	0.780756	6.08138e-10
FBgn0003079	Raf	0.780372	4.64361e-22
FBgn0026369	Sara	0.777654	7.82035e-14
FBgn0263391	hts	0.776948	5.24598e-12
FBgn0039937	fd102C	0.776937	0.000423936
FBgn0026179	siz	0.776929	2.45712e-25
FBgn0037702	CG8176	0.776833	2.74968e-27
FBgn0039167	CG17786	0.776704	0.000240303
FBgn0037753	CG12947	0.776255	0.000280545
FBgn0037811	CG12592	0.776078	0.000117873
FBgn0039249	CG11168	0.775678	0.000129931
FBgn0000562	egl	0.775303	9.51327e-27
FBgn0027594	drpr	0.775138	1.1813e-13
FBgn0032876	Cen	0.773702	4.47731e-11
FBgn0027580	PCB	0.773218	2.85335e-25
FBgn0261286	Mat89Ba	0.77299	8.50671e-13
FBgn0262169	magu	0.772906	3.1914e-07
FBgn0086442	mib2	0.771974	1.57983e-12
FBgn0003093	Pkc98E	0.771125	1.19632e-12
FBgn0033062	Ars2	0.770844	1.50096e-20
FBgn0266410	CG45050	0.770606	3.22258e-10
FBgn0002989	okr	0.770582	2.78598e-11
FBgn0029912	CG4557	0.769899	3.92016e-11
FBgn0266958	lncRNA:CR45409	0.76975	5.30483e-06
FBgn0003710	tipE	0.769586	2.29287e-07
FBgn0039690	Gnpnat	0.769556	2.49258e-08
FBgn0259735	mtgo	0.76756	6.32856e-15
FBgn0014006	Ask1	0.767545	2.77305e-12
FBgn0035121	Tudor-SN	0.767342	2.44241e-06
FBgn0038197	foxo	0.767326	2.8368e-08
FBgn0033984	Lap1	0.76585	5.01505e-17
FBgn0266572	ebo	0.765645	1.67474e-30
FBgn0027794	Lrpprc2	0.765599	5.0082e-13
FBgn0033482	CG1371	0.765252	6.86239e-07
FBgn0037659	Kdm2	0.765217	8.92578e-23
FBgn0001079	fu	0.765007	1.62089e-14
FBgn0002783	mor	0.763679	1.79802e-18
FBgn0052016	4E-T	0.7607	1.9194e-11
FBgn0015615	SMC3	0.759948	6.11995e-22
FBgn0019890	Smg5	0.759096	1.79463e-22
FBgn0031782	WDR79	0.758528	1.18494e-07
FBgn0033177	CG11141	0.75849	4.05799e-12
FBgn0036556	hzg	0.756983	4.38995e-15
FBgn0003716	tkv	0.756785	0.000408987
FBgn0024191	sip1	0.756021	3.90322e-17
FBgn0263755	Su(var)3-9	0.755128	5.44424e-17
FBgn0039560	BOD1	0.755019	2.77027e-19
FBgn0039055	Rassf	0.753391	6.3058e-16
FBgn0263232	Nxf3	0.752668	2.61483e-10
FBgn0013263	Trl	0.752083	0.000148589
FBgn0033453	Sting	0.75121	3.1203e-06
FBgn0050147	Hil	0.751115	8.35093e-14
FBgn0039904	Hcf	0.751029	2.70495e-21
FBgn0030245	CG1637	0.750953	0.000908413
FBgn0285913	red	0.748562	1.61056e-09
FBgn0050344	CG30344	0.748161	3.40049e-05
FBgn0023507	D2hgdh	0.747894	4.50538e-07
FBgn0002121	l(2)gl	0.746167	3.58529e-11
FBgn0261283	SREBP	0.744782	1.27631e-11
FBgn0033527	CG11777	0.743377	2.1956e-18
FBgn0002723	Met	0.742911	6.39273e-10
FBgn0000482	dor	0.742785	1.11905e-16
FBgn0023441	fus	0.742724	8.01598e-14
FBgn0037717	CG8301	0.742084	7.32378e-13
FBgn0261986	RASSF8	0.742052	1.74916e-13
FBgn0004406	PolG1	0.741589	7.96736e-12
FBgn0266452	CTPsyn	0.740341	2.76524e-15
FBgn0015799	Rbf	0.73909	1.8905e-19
FBgn0037282	CG14657	0.735953	2.37811e-09
FBgn0261243	Psa	0.735751	2.19487e-12
FBgn0259113	PolA1	0.73543	4.33621e-12
FBgn0013759	CASK	0.733514	8.53935e-16
FBgn0003719	tld	0.733479	3.63953e-05
FBgn0022213	Cse1	0.733103	1.4981e-11
FBgn0005674	GluProRS	0.732815	1.1083e-07
FBgn0033376	CG8777	0.731494	1.65756e-10
FBgn0259876	Cap-G	0.729944	1.60235e-30
FBgn0032341	Reps	0.729932	1.65097e-13
FBgn0026432	Grip163	0.729303	2.47151e-20
FBgn0020312	Tmtc3	0.729241	1.35962e-13
FBgn0037705	mura	0.728691	1.10902e-07
FBgn0036032	CG16711	0.727774	4.09019e-13
FBgn0086384	Mer	0.727359	4.77347e-20
FBgn0039229	Saf-B	0.727207	3.80078e-10
FBgn0011837	Tis11	0.725006	2.48211e-12
FBgn0027279	l(1)G0196	0.724839	1.1064e-09
FBgn0032934	CG8679	0.724746	2.79118e-16
FBgn0051145	CG31145	0.724657	1.99133e-06
FBgn0250732	gfzf	0.724598	4.25972e-14
FBgn0031174	CG1486	0.724493	6.16961e-20
FBgn0024187	syd	0.724297	1.70863e-12
FBgn0005672	spi	0.724277	1.03428e-12
FBgn0023177	Pp4-19C	0.723118	0.000324894
FBgn0016031	lama	0.722129	1.35882e-18
FBgn0086784	stmA	0.721998	2.30044e-33
FBgn0045842	yuri	0.721487	6.15726e-06
FBgn0021800	Reph	0.721356	1.88124e-07
FBgn0086129	snama	0.72067	1.57908e-13
FBgn0025684	MFS18	0.720035	1.36114e-11
FBgn0050122	CG30122	0.71892	4.80165e-08
FBgn0015396	jumu	0.718713	1.20405e-14
FBgn0030093	Bap111	0.718578	1.27715e-06
FBgn0025574	Pli	0.718069	8.99537e-17
FBgn0038827	Fancd2	0.717865	2.50062e-20
FBgn0001139	gro	0.717639	5.27376e-31
FBgn0051365	CG31365	0.717452	4.12708e-22
FBgn0031738	CG9171	0.716908	2.40843e-14
FBgn0037021	Pcif1	0.716569	1.25295e-26
FBgn0004374	neb	0.716411	9.84777e-12
FBgn0040234	c12.2	0.716159	3.71145e-12
FBgn0025739	pon	0.715918	4.95396e-07
FBgn0030141	Gga	0.71542	7.74722e-11
FBgn0003268	rod	0.713348	1.71075e-17
FBgn0029706	CG3626	0.712308	2.09738e-21
FBgn0030114	CG17754	0.712115	3.78962e-22
FBgn0023528	CG2924	0.711567	6.44376e-13
FBgn0037554	PolI	0.71136	6.23955e-15
FBgn0030625	CG5877	0.709243	2.76749e-09
FBgn0011642	Zyx	0.709061	1.23357e-07
FBgn0041094	scyl	0.709039	2.80937e-09
FBgn0036814	CG14073	0.708898	2.45304e-14
FBgn0033713	CG8841	0.70762	1.88213e-25
FBgn0040324	Ephrin	0.707294	1.17655e-05
FBgn0004795	retn	0.705312	3.91871e-66
FBgn0033051	Strica	0.704872	9.11711e-08
FBgn0010397	LamC	0.703938	3.4541e-06
FBgn0037188	CG7369	0.70349	3.36419e-14
FBgn0001218	Hsc70-3	0.703228	1.61552e-07
FBgn0038488	m-cup	0.702983	1.86888e-24
FBgn0262866	S6kII	0.702899	2.74968e-27
FBgn0260003	Dys	0.702838	1.27118e-06
FBgn0004882	orb	0.7026	4.57113e-10
FBgn0023130	a6	0.70147	3.44219e-20
FBgn0051998	CG31998	0.701411	2.18234e-06
FBgn0053180	Ranbp16	0.701325	1.73673e-18
FBgn0264075	tgo	0.700349	2.86727e-17
FBgn0266409	CG45049	0.699977	8.6654e-07
FBgn0023512	eIF2Bε	0.699772	5.86216e-23
FBgn0003882	tub	0.698432	3.23714e-11
FBgn0031233	Tbc1d15-17	0.697943	1.03756e-20
FBgn0035833	CG7565	0.697337	6.8892e-11
FBgn0036509	CG7739	0.696702	5.93165e-05
FBgn0031456	Tnpo-SR	0.695641	1.49658e-13
FBgn0022153	l(2)k05819	0.695007	1.04029e-23
FBgn0051935	Rab3GAP1	0.692271	5.99801e-31
FBgn0023509	mip130	0.691687	1.02368e-12
FBgn0027616	Ythdc1	0.691178	2.11374e-24
FBgn0039858	CycG	0.690967	4.59334e-20
FBgn0038860	Ice2	0.690504	6.97132e-20
FBgn0052103	SCaMC	0.690315	1.03556e-21
FBgn0030018	slpr	0.689613	9.04534e-19
FBgn0027620	Acf	0.689555	6.09594e-26
FBgn0032382	Mal-B2	0.689149	2.40337e-10
FBgn0029944	Dok	0.689036	1.71625e-23
FBgn0039213	atl	0.688076	8.15355e-19
FBgn0283521	lola	0.687294	5.04709e-31
FBgn0020633	Mcm7	0.687037	9.97762e-12
FBgn0267351	Topors	0.686908	5.50575e-22
FBgn0036299	Tsf2	0.686724	5.39527e-08
FBgn0051550	CG31550	0.686639	1.68703e-08
FBgn0038597	CG8064	0.686088	8.29374e-22
FBgn0026323	Tak1	0.685825	2.48514e-07
FBgn0015903	apt	0.684808	3.97268e-20
FBgn0015371	chn	0.684348	4.95812e-20
FBgn0031836	CG11050	0.684236	1.12027e-19
FBgn0265184	CG44249	0.684202	0.000639029
FBgn0262517	Ltn1	0.684181	2.36467e-18
FBgn0035151	CG17129	0.683431	5.12958e-06
FBgn0011604	Iswi	0.683263	0.000122733
FBgn0027660	blot	0.682944	5.87364e-06
FBgn0027330	l(1)G0020	0.682715	1.93053e-09
FBgn0036039	Naa60	0.682649	2.3961e-06
FBgn0030301	HP5	0.681929	4.93658e-13
FBgn0024245	dnt	0.681357	4.88646e-08
FBgn0033454	CG1671	0.680774	2.98402e-27
FBgn0263108	BtbVII	0.679459	3.26274e-19
FBgn0036801	MYPT-75D	0.6792	2.89755e-23
FBgn0265574	Cdc5	0.679012	4.36022e-18
FBgn0003300	run	0.678914	0.000118757
FBgn0035888	CG7120	0.676991	6.12351e-13
FBgn0039532	Mtl	0.676043	3.4108e-11
FBgn0036187	RIOK1	0.67422	2.76134e-08
FBgn0003261	Rm62	0.673425	4.65727e-06
FBgn0053526	PNUTS	0.673069	2.46143e-10
FBgn0263102	psq	0.672031	6.49879e-14
FBgn0260450	CalpC	0.670718	1.38184e-15
FBgn0037092	M6	0.669726	9.2938e-07
FBgn0027506	EDTP	0.669413	1.07761e-08
FBgn0038395	Jhbp5	0.669347	2.85138e-05
FBgn0263005	Chpf	0.66871	7.42878e-11
FBgn0052676	stx	0.668638	4.03986e-23
FBgn0038427	ema	0.6685	2.94202e-16
FBgn0031885	Mnn1	0.667617	1.95804e-12
FBgn0016754	sba	0.66738	4.33621e-12
FBgn0031384	CG4238	0.667101	7.23656e-20
FBgn0287873	zip	0.667074	7.86337e-07
FBgn0032130	brwl	0.666611	1.05598e-11
FBgn0039117	tst	0.666488	1.24725e-20
FBgn0028467	Ube4A	0.665825	1.38459e-12
FBgn0000810	fs(1)K10	0.665715	1.58075e-11
FBgn0035113	pyx	0.665644	0.000183399
FBgn0036483	CG12316	0.663998	3.24101e-15
FBgn0035333	CG1317	0.659725	6.56005e-08
FBgn0030091	CG7065	0.659509	2.90746e-24
FBgn0015024	CkIα	0.658413	5.8557e-08
FBgn0035111	Dis3l2	0.656908	3.43237e-15
FBgn0015838	Vang	0.656593	8.05612e-10
FBgn0264090	CG43759	0.654282	4.02647e-35
FBgn0031057	Ubqn	0.653902	5.44186e-11
FBgn0261278	grp	0.652608	7.83101e-19
FBgn0010313	corto	0.651999	1.74281e-10
FBgn0040208	Kat60	0.650684	2.58128e-30
FBgn0031519	Fign	0.649683	1.82406e-09
FBgn0031635	tank	0.649431	7.55257e-07
FBgn0031868	Rat1	0.64854	2.33882e-06
FBgn0030246	CG1582	0.648048	9.36095e-13
FBgn0023526	CG2865	0.647364	5.60805e-08
FBgn0037633	CG9839	0.646585	1.24379e-11
FBgn0003278	Polr1B	0.646508	5.7635e-09
FBgn0014870	Psi	0.645008	1.52905e-05
FBgn0030803	CG4880	0.643823	6.26524e-05
FBgn0027539	lili	0.643017	1.25532e-10
FBgn0020620	RN-tre	0.642121	1.05521e-17
FBgn0030687	Polr3A	0.641439	5.27027e-09
FBgn0031814	retm	0.640721	1.68932e-07
FBgn0000376	crm	0.640523	2.98043e-18
FBgn0004957	por	0.640475	2.10783e-05
FBgn0259938	cwo	0.639954	1.8911e-11
FBgn0022986	qkr58E-1	0.639515	8.29335e-05
FBgn0039663	CG2321	0.639125	3.82646e-07
FBgn0040075	rept	0.638863	1.29396e-05
FBgn0001086	fzy	0.63884	1.73667e-06
FBgn0029891	Pink1	0.638138	1.22742e-10
FBgn0038303	SIDL	0.637971	3.58333e-13
FBgn0028494	CG6424	0.637445	3.9979e-19
FBgn0030731	Mfe2	0.637062	2.55637e-09
FBgn0037814	CG6325	0.636838	2.01837e-16
FBgn0010660	Nup214	0.635833	9.99552e-11
FBgn0039543	CROT	0.635145	8.3211e-23
FBgn0030090	fend	0.634931	6.04165e-08
FBgn0022069	Nnp-1	0.633934	9.4749e-06
FBgn0035207	Herc4	0.633356	1.9371e-20
FBgn0033021	CG10417	0.632376	0.000240054
FBgn0030320	CG2247	0.63089	7.62642e-15
FBgn0020510	Abi	0.630458	1.55375e-13
FBgn0037249	eIF3a	0.629099	1.32752e-09
FBgn0260012	pds5	0.629026	1.97713e-16
FBgn0033698	CG8858	0.628917	1.79442e-10
FBgn0010113	hdc	0.628783	3.06975e-05
FBgn0024991	CG2694	0.628188	9.02493e-25
FBgn0013995	Calx	0.628067	1.08003e-18
FBgn0030870	CG6398	0.625942	2.14454e-08
FBgn0003218	rdgB	0.625705	1.16208e-17
FBgn0250850	rig	0.624861	1.8086e-22
FBgn0028695	Rpn1	0.624413	2.58083e-07
FBgn0029893	CG14442	0.624166	2.81481e-15
FBgn0024291	Sirt1	0.624033	4.83693e-10
FBgn0011202	dia	0.623599	1.1661e-10
FBgn0086698	frtz	0.62151	7.87599e-16
FBgn0040388	boi	0.621259	3.51658e-09
FBgn0005640	Eip63E	0.621073	4.26433e-21
FBgn0036566	ClC-c	0.620765	9.86697e-11
FBgn0052758	Snx27	0.620508	4.27479e-08
FBgn0017581	Lk6	0.620459	5.81864e-10
FBgn0000499	dsh	0.620165	1.27983e-13
FBgn0040230	dbo	0.618376	1.54848e-16
FBgn0026361	Septin5	0.618358	6.13823e-09
FBgn0243511	psidin	0.618074	2.50059e-09
FBgn0039773	CG2224	0.617729	3.89141e-19
FBgn0030960	Atg101	0.617014	6.28197e-07
FBgn0051989	Cap-D3	0.616923	3.00757e-10
FBgn0033352	PAN2	0.616833	8.19053e-18
FBgn0001404	egh	0.61682	1.25979e-11
FBgn0004395	unk	0.615915	7.57571e-09
FBgn0033564	Pex6	0.615561	1.49688e-07
FBgn0003231	ref(2)P	0.614883	4.51614e-16
FBgn0027101	Dyrk3	0.614761	6.17593e-10
FBgn0000116	Argk1	0.614649	1.6161e-13
FBgn0011481	Ssdp	0.612092	2.18501e-13
FBgn0037770	Art4	0.611934	2.42302e-20
FBgn0036448	mop	0.610703	2.39449e-07
FBgn0022985	qkr58E-2	0.610181	6.82824e-17
FBgn0004359	T48	0.609928	3.68898e-13
FBgn0261387	CG17528	0.606808	9.72148e-11
FBgn0034098	krimp	0.606049	2.65774e-11
FBgn0036842	Ugt316A1	0.605937	4.68977e-09
FBgn0027079	ValRS	0.605537	1.62177e-07
FBgn0035229	pns	0.60486	7.12182e-12
FBgn0262617	Nuak	0.604573	1.00042e-12
FBgn0034997	CG3376	0.604074	7.61915e-05
FBgn0287696	mus302	0.60389	1.4649e-12
FBgn0027553	NELF-B	0.603609	6.80601e-10
FBgn0038244	CG7987	0.603568	1.58222e-15
FBgn0026722	drosha	0.603169	4.1205e-13
FBgn0033121	Cyp6u1	0.602146	2.63153e-06
FBgn0264693	ens	0.602013	1.42675e-19
FBgn0003028	ovo	0.601648	1.16564e-21
FBgn0037339	Pi4KIIα	0.601285	3.27493e-07
FBgn0267821	da	0.60125	1.35706e-24
FBgn0030739	SWIP	0.601081	2.77249e-07
FBgn0038532	CG14322	0.598774	6.5769e-11
FBgn0038475	Keap1	0.596914	3.79896e-12
FBgn0263593	Lpin	0.596797	1.7857e-13
FBgn0036124	CG7839	0.596787	4.38779e-08
FBgn0086346	ALiX	0.596398	6.66321e-13
FBgn0011704	RnrS	0.595447	1.97405e-19
FBgn0034691	Synj	0.594624	9.18981e-11
FBgn0033609	Fbl6	0.593157	1.59723e-05
FBgn0031399	mio	0.590966	4.2109e-10
FBgn0032339	Wdr59	0.590687	2.61291e-11
FBgn0005536	Mbs	0.590346	1.16527e-18
FBgn0026015	Top3β	0.590104	2.8039e-14
FBgn0000228	Nin	0.589674	7.57186e-15
FBgn0032717	CG10600	0.589235	3.50251e-15
FBgn0037926	Elp1	0.588431	3.07446e-10
FBgn0010583	dock	0.58761	3.38024e-14
FBgn0263864	Dark	0.587496	7.54767e-07
FBgn0030208	PPP4R2r	0.587062	0.000421278
FBgn0031020	Naa15-16	0.585094	4.48266e-19

## Sheet: Common input vs IgG
Common targets between Dcr-2 IP vs Input and Dcr-2 IP vs IgG
Adjusted p-value < 0,001 and log2 Fold Change > 0,584962
FlyBase ID	Gene name	Dcr-2 IP vs input		Dcr-2 IP vs IgG IP		Description
		log2FC	padj	log2FC	padj
FBgn0031374	Wdr62	2.75095	2.57237e-259	1.56462	6.08557e-93	WD repeat domain 62
FBgn0001087	g	1.89411	1.09796e-234	0.904749	1.33783e-59	garnet
FBgn0019990	Gcn2	2.45169	4.5028e-233	1.39423	2.12106e-83	Gcn2
FBgn0025864	Crag	3.03422	4.7793e-231	1.71626	6.9671e-82	Calmodulin-binding protein related to a Rab3 GDP/GTP exchange protein
FBgn0035437	Strip	2.06831	5.60786e-227	1.44916	7.18353e-122	Striatin interacting protein
FBgn0025186	ari-2	2.24648	2.4053e-225	1.44106	5.79294e-102	ariadne 2
FBgn0250786	Chd1	2.56641	2.26993e-224	1.32925	7.92909e-67	Chromodomain-helicase-DNA-binding protein 1
FBgn0025725	Œ±COP	2.06767	4.72988e-221	1.21686	2.8126e-84	Coat Protein (coatomer) alpha
FBgn0266696	Svil	2.58256	1.5209e-218	1.29508	3.93474e-61	Supervillin
FBgn0039492	CG6051	2.72115	4.6305e-218	1.52013	2.02887e-75	-
FBgn0010280	Taf4	1.54432	1.65011e-196	0.939544	6.43734e-80	TBP-associated factor 4
FBgn0260789	mxc	2.19069	5.57156e-189	1.27107	1.83683e-70	multi sex combs
FBgn0033212	LRR	2.08378	6.88093e-187	1.1942	6.28375e-68	Leucine-rich repeat
FBgn0003210	rb	2.12024	3.76832e-184	1.34025	4.99181e-81	ruby
FBgn0034854	Golgin245	2.80888	4.60614e-184	1.98016	9.70143e-101	Golgin-245
FBgn0034400	CG15099	2.85134	1.52135e-181	1.52968	3.81301e-58	-
FBgn0025639	Hmt4-20	2.05163	1.55574e-181	1.15497	8.63138e-64	Histone methyltransferase 4-20
FBgn0003277	Polr2A	2.94265	7.99827e-181	1.31278	1.92239e-40	RNA polymerase II subunit A
FBgn0035145	MED14	2.71474	5.87525e-180	1.36322	1.17708e-50	Mediator complex subunit 14
FBgn0053208	Mical	2.82048	1.12612e-178	1.69784	1.00557e-71	Molecule interacting with CasL
FBgn0038816	Lrrk	3.02884	1.99662e-177	1.3851	8.12885e-42	Leucine-rich repeat kinase
FBgn0036004	Jarid2	3.18998	5.19983e-176	1.62878	3.82737e-51	Jumonji
FBgn0037116	Als2	2.34569	8.19405e-175	1.20841	1.00609e-51	Amyotrophic lateral sclerosis 2
FBgn0011785	BRWD3	3.14059	1.41739e-170	1.65081	1.60123e-52	BRWD3
FBgn0039302	Nup358	3.04582	1.70592e-169	1.9804	3.89647e-79	Nucleoporin 358kD
FBgn0082831	pps	3.33337	6.23244e-169	2.03571	7.86025e-70	protein partner of snf
FBgn0261793	Trf2	2.4646	2.0504e-165	1.16951	9.68951e-42	TATA box binding protein-related factor 2
FBgn0037344	CG2926	2.71179	2.07398e-164	1.83304	8.75142e-83	-
FBgn0014037	Su(Tpl)	2.31731	3.06773e-164	1.14119	1.52214e-44	Suppressor of Triplolethal
FBgn0021796	Tor	2.63937	5.02596e-164	1.01103	1.64095e-27	Target of rapamycin
FBgn0263346	smash	3.00669	7.67238e-164	1.9183	9.25712e-74	smallish
FBgn0010382	CycE	1.80326	1.22001e-163	1.18232	1.59939e-77	Cyclin E
FBgn0033636	tou	3.38889	1.40772e-163	1.52068	4.36014e-37	toutatis
FBgn0262582	cic	2.87667	6.62095e-163	1.51395	2.83527e-50	capicua
FBgn0030049	Trf4-1	1.93124	1.43557e-162	0.948455	8.18279e-44	Topoisomerase related function 4-1
FBgn0031078	Nup205	3.00499	1.29236e-160	1.49855	1.13962e-44	Nucleoporin 205kD
FBgn0035713	velo	2.62005	2.86337e-158	1.55219	1.42237e-61	veloren
FBgn0023518	trr	3.37579	2.99682e-157	1.76034	8.44857e-48	trithorax-related
FBgn0026181	Rok	2.12692	3.41753e-157	0.847879	1.9718e-28	Rho kinase
FBgn0250754	CG42232	3.49732	1.60042e-155	3.20212	4.27678e-143	-
FBgn0037363	Atg17	2.23064	3.0584e-155	0.872716	4.18911e-27	Autophagy-related 17
FBgn0260938	tay	2.74251	4.20098e-155	1.45527	1.08532e-48	tay bridge
FBgn0034641	mahj	2.30288	4.43053e-154	1.52394	2.21435e-74	mahjong
FBgn0031030	Tao	1.88533	4.92541e-154	1.10578	1.13921e-58	Tao
FBgn0020306	dom	3.37755	2.44044e-153	1.67785	2.56858e-42	domino
FBgn0003977	vir	3.21424	4.34646e-153	1.95776	4.23077e-63	virilizer
FBgn0050085	Rif1	2.11062	1.60161e-152	1.24012	2.64799e-58	Rap1 interacting factor 1
FBgn0000721	for	2.27653	2.31194e-152	1.42124	1.19302e-65	foraging
FBgn0031006	rictor	2.6642	7.82876e-152	1.19511	1.85016e-34	rapamycin-insensitive companion of Tor
FBgn0015269	Nf1	2.55763	2.80916e-151	1.2995	1.03536e-43	Neurofibromin 1
FBgn0036451	Helz	2.90667	2.63388e-150	1.56476	1.58854e-48	Helicase with zinc finger
FBgn0003475	spir	2.40514	7.02917e-150	1.28686	8.44748e-48	spire
FBgn0052767	CG32767	2.89954	6.93807e-149	1.96517	2.02887e-75	-
FBgn0019938	Polr1A	1.77612	7.55974e-149	0.795801	1.19266e-33	RNA polymerase I subunit A
FBgn0283427	FASN1	3.4254	1.82197e-148	1.42528	1.39251e-29	Fatty acid synthase 1
FBgn0033155	Br140	2.2434	1.8336e-148	1.0801	1.33322e-38	Bromodomain-containing protein
FBgn0261383	IntS6	2.45035	2.3365e-148	1.0325	6.90755e-30	Integrator 6
FBgn0004391	shtd	2.97668	1.83035e-145	1.6712	5.32307e-51	shattered
FBgn0040233	cana	1.97025	7.53159e-145	0.989998	6.7882e-41	CENP-ana
FBgn0026432	Grip163	2.09671	4.09698e-144	0.729303	2.47151e-20	Grip163
FBgn0022764	Sin3A	2.97452	4.88894e-144	1.65516	1.38541e-49	Sin3A
FBgn0085436	Not1	2.90978	5.97598e-144	1.27837	2.11445e-31	Not1
FBgn0000247	ca	2.35806	2.23924e-143	1.33427	5.40866e-51	claret
FBgn0264542	hwt	2.94172	6.05851e-143	1.57624	2.6523e-46	heavyweight
FBgn0000017	Abl	2.7896	8.23329e-143	1.6489	2.12774e-55	Abl tyrosine kinase
FBgn0263048	Gpdh3	2.33544	6.76455e-142	1.20911	1.00024e-42	Glycerol-3-phosphate dehydrogenase 3
FBgn0261550	Orp8	1.982	2.17074e-141	0.842894	4.93377e-29	Oxysterol-binding protein-related protein 8
FBgn0030809	Ubr1	2.52503	7.66897e-140	1.24045	7.41332e-38	Ubr1 ubiquitin ligase
FBgn0035617	l(3)psg2	3.40891	8.62536e-140	1.45429	5.78608e-29	lethal (3) persistent salivary gland 2
FBgn0264357	SNF4AŒ≥	2.05816	3.58025e-139	1.49222	3.02029e-80	SNF4/AMP-activated protein kinase gamma subunit
FBgn0260970	Ubr3	2.90467	5.47072e-139	1.44936	8.72124e-39	Ubr3 ubiquitin ligase
FBgn0004387	Klp98A	2.24405	1.7114e-138	1.14942	1.12206e-40	Kinesin-like protein at 98A
FBgn0000052	Pfas	2.22962	2.32024e-138	0.976861	4.20948e-30	Phosphoribosylformylglycinamidine synthase
FBgn0026575	hang	2.40702	2.67316e-138	1.80155	5.55604e-85	hangover
FBgn0030812	wcy	2.18806	3.37507e-138	1.15943	2.6881e-43	wacky
FBgn0000140	asp	2.36595	4.347e-138	1.32448	4.14524e-48	abnormal spindle
FBgn0032723	ssp3	3.09669	2.41168e-137	2.53892	3.62761e-101	short spindle 3
FBgn0001330	kz	1.69387	3.8871e-136	1.27822	6.81423e-83	kurz
FBgn0034795	MED23	1.89243	2.81104e-135	0.799113	1.78539e-27	Mediator complex subunit 23
FBgn0263968	nonC	3.15829	4.89926e-134	1.4108	2.32184e-30	no-on-and-no-off transient C
FBgn0050372	Asap	2.11605	6.78535e-133	1.31848	5.05403e-57	ArfGAP with SH3 domain
FBgn0029870	Marf	1.63754	7.73108e-133	0.830565	3.56113e-38	Mitochondrial assembly regulatory factor
FBgn0030266	CG11122	4.08117	1.49157e-131	2.18446	3.45705e-42	-
FBgn0031052	Elys	2.88239	1.51993e-131	1.47197	1.91642e-38	-
FBgn0001965	Sos	2.53266	3.36262e-131	1.2921	2.63204e-38	Son of sevenless
FBgn0016977	spen	3.7829	3.46026e-131	1.70242	4.72437e-30	split ends
FBgn0010300	brat	2.39166	6.92194e-131	1.49324	1.7871e-56	brain tumor
FBgn0262614	pyd	2.88676	9.94537e-131	1.37318	2.50565e-33	polychaetoid
FBgn0051755	SoYb	1.92098	2.30722e-130	1.44567	1.45388e-80	Sister of Yb
FBgn0262167	ana1	3.13714	4.16705e-130	2.81075	5.22558e-114	anastral spindle 1
FBgn0033661	CG13185	3.56074	8.81868e-130	1.28774	1.07666e-19	-
FBgn0025681	CG3558	1.48112	2.56364e-129	0.807209	1.61207e-42	-
FBgn0086451	l(2)k09022	2.84195	2.80175e-129	1.53806	2.71879e-42	lethal (2) k09022
FBgn0002441	l(3)mbt	2.20307	2.95269e-129	1.6492	2.10829e-79	lethal (3) malignant brain tumor
FBgn0285917	sbb	3.03772	7.58535e-129	2.00354	6.38438e-62	scribbler
FBgn0261931	Hecw	2.87588	1.36369e-128	1.65542	2.12902e-47	Hecw ubiquitin protein ligase
FBgn0005632	faf	2.4458	1.48983e-128	1.0771	2.84299e-28	fat facets
FBgn0266019	rudhira	2.7873	4.73722e-128	1.60173	4.90679e-47	rudhira
FBgn0262081	Csk	1.67895	5.60782e-128	1.10729	3.82316e-61	C-terminal Src kinase
FBgn0267390	dop	3.62557	8.71005e-128	2.58092	2.17182e-71	drop out
FBgn0039727	Vps13B	2.83312	1.06249e-127	1.31749	3.01443e-31	Vacuolar protein sorting 13B
FBgn0039214	puf	4.86374	1.22824e-126	1.72311	1.60783e-18	puffyeye
FBgn0027508	Tnks	2.91938	3.60366e-126	1.6537	3.59885e-45	tankyrase
FBgn0263110	CG43367	2.88825	8.89977e-126	1.05646	1.41902e-19	-
FBgn0036398	upSET	3.56656	1.07361e-125	1.78642	2.16782e-35	upSET
FBgn0004368	Ptp4E	2.62044	1.39694e-125	1.33271	1.87928e-36	Protein tyrosine phosphatase 4E
FBgn0053087	LRP1	4.05321	7.04892e-125	1.53489	1.02694e-20	LDL receptor protein 1
FBgn0263998	Ack-like	1.81306	1.25065e-124	0.894429	4.92666e-34	Activated Cdc42 kinase-like
FBgn0260442	rhea	3.47685	1.27592e-124	2.04075	1.0289e-47	rhea
FBgn0034300	CG5098	2.29314	1.51978e-124	1.27953	3.26882e-43	-
FBgn0032796	cyst	2.06884	1.65822e-124	1.30011	2.43082e-54	cysts
FBgn0266572	ebo	1.64172	1.71131e-124	0.765645	1.67474e-30	ellipsoid body open
FBgn0267408	AOX1	2.41225	2.05025e-124	1.19099	1.02583e-34	Aldehyde oxidase 1
FBgn0030674	HUWE1	3.43759	2.8321e-124	1.07101	2.45168e-14	HECT
FBgn0003396	shn	2.90105	5.80133e-124	1.26449	7.80331e-27	schnurri
FBgn0261885	osa	3.39852	8.37039e-124	1.66904	1.37333e-33	osa
FBgn0261985	Ptpmeg	1.46486	8.78105e-124	0.908128	2.57443e-52	Protein tyrosine phosphatase Meg
FBgn0032395	Wdr81	3.10288	1.0777e-123	1.69422	2.92217e-41	WD repeat domain 81
FBgn0000581	E(Pc)	3.13651	3.47752e-123	1.52211	1.16288e-32	Enhancer of Polycomb
FBgn0010303	hep	2.32113	3.99358e-123	1.38115	2.34677e-48	hemipterous
FBgn0003862	trx	3.04155	6.96384e-123	1.44464	2.86528e-31	trithorax
FBgn0043362	bchs	3.34082	8.19469e-123	1.25808	1.85555e-20	blue cheese
FBgn0010909	msn	2.03148	2.93802e-122	1.16736	7.1144e-45	misshapen
FBgn0039016	Dcr-1	3.52986	2.985e-122	1.82855	8.40966e-37	Dicer-1
FBgn0029903	pod1	2.09388	3.45934e-122	1.04236	5.15455e-34	pod1 coronin
FBgn0036374	Spt20	2.6959	5.61401e-122	1.61641	1.14226e-48	Spt20
FBgn0034733	CG4752	2.10301	1.69145e-121	1.4276	2.88599e-61	-
FBgn0265630	sno	2.06383	4.7587e-121	1.24688	6.44112e-49	strawberry notch
FBgn0019968	Khc-73	2.31864	7.43895e-121	1.11128	2.60275e-31	Kinesin heavy chain 73
FBgn0016081	fry	3.61532	4.23803e-120	1.30351	3.08023e-18	furry
FBgn0036668	Zcchc7	2.17471	5.99702e-120	1.51739	2.95924e-64	Zinc finger CCHC-type containing 7
FBgn0004864	hop	1.92842	4.53679e-119	1.07078	6.9264e-41	hopscotch
FBgn0033638	atos	2.98478	6.1882e-119	1.75748	7.87138e-46	atossa
FBgn0030504	CG2691	1.69664	9.4437e-119	0.991797	5.5118e-45	-
FBgn0260945	Atg1	1.90044	1.892e-118	1.1388	4.32649e-47	Autophagy-related 1
FBgn0004647	N	3.65954	5.85497e-118	1.54631	4.55269e-24	Notch
FBgn0038504	Sur-8	1.90282	6.36688e-118	1.18299	3.1638e-50	Sur-8
FBgn0010051	Itpr	3.69466	9.65295e-118	1.59915	3.17261e-25	Inositol 1
FBgn0038853	RhoGAP93B	2.4606	1.01898e-117	1.64145	9.11997e-58	Rho GTPase activating protein at 93B
FBgn0035162	Sf3b3	2.30041	2.68803e-117	1.48067	1.09057e-53	Splicing factor 3b subunit 3
FBgn0030486	Set2	3.0673	8.79135e-117	1.27116	5.42676e-23	SET domain containing 2
FBgn0085408	Shrm	3.463	1.37018e-116	1.79987	1.31227e-37	Shroom
FBgn0022787	Hel89B	2.21471	1.64537e-116	1.05389	8.08256e-30	Helicase 89B
FBgn0034249	RhoGAP54D	1.47472	3.83596e-116	1.27022	2.8506e-92	Rho GTPase activating protein at 54D
FBgn0038108	CG7518	2.80328	5.76863e-116	1.47137	8.29044e-36	-
FBgn0029688	lva	2.67713	1.88939e-115	1.25222	1.37221e-28	lava lamp
FBgn0030512	Nadsyn	2.01158	2.7124e-115	1.05493	1.71407e-35	NAD synthetase
FBgn0031051	Ranbp21	2.29035	2.74045e-115	1.37352	5.13202e-46	Ranbp21
FBgn0031759	Kdm5	3.04209	7.4917e-115	1.37118	1.65109e-26	Lysine demethylase 5
FBgn0037918	CG6791	2.36314	1.1054e-114	1.39406	2.32208e-44	-
FBgn0044452	Atg2	2.96559	1.31077e-114	1.51188	1.6152e-33	Autophagy-related 2
FBgn0053144	CG33144	2.32643	1.35902e-114	1.55665	2.35305e-56	-
FBgn0266756	btsz	3.50802	3.09294e-114	2.32822	1.06139e-55	bitesize
FBgn0037218	aux	1.89073	3.56797e-114	1.1429	3.58452e-46	auxilin
FBgn0053558	mim	3.6251	9.02604e-114	2.25295	9.32532e-49	missing-in-metastasis
FBgn0033159	Dscam1	3.51527	9.71954e-114	1.32776	1.67329e-19	Down syndrome cell adhesion molecule 1
FBgn0025641	DAAM	2.99903	4.17059e-113	1.36973	8.21802e-27	Dishevelled Associated Activator of Morphogenesis
FBgn0011202	dia	2.25157	4.63795e-113	0.623599	1.1661e-10	diaphanous
FBgn0003415	skd	3.47916	4.75774e-113	1.34559	1.43557e-19	skuld
FBgn0033889	CG6701	2.06981	6.79624e-113	1.18124	6.10602e-41	-
FBgn0259228	C3G	2.33678	7.19116e-113	1.30783	1.86565e-39	C3G guanyl-nucleotide exchange factor
FBgn0023172	RhoGEF2	3.49076	8.74992e-113	2.00354	2.14543e-41	Rho guanine nucleotide exchange factor 2
FBgn0283712	LIMK1	2.20284	8.89058e-113	1.53357	5.06266e-60	LIM domain kinase 1
FBgn0262719	CG43163	3.42883	9.59715e-113	1.33773	1.72542e-20	-
FBgn0267350	Pi4KIIIŒ±	3.10789	1.85172e-112	1.53304	7.56848e-31	Phosphatidylinositol 4-kinase III alpha
FBgn0034009	CG8155	2.28124	7.63566e-112	1.15823	1.92453e-32	-
FBgn0027532	CG7139	1.77758	1.85505e-111	1.08209	1.1937e-45	-
FBgn0042085	Bap170	2.2949	2.54975e-111	1.04112	4.89497e-26	Brahma associated protein 170kD
FBgn0015278	Pi3K68D	2.73798	2.5766e-111	1.48056	1.94756e-36	Phosphatidylinositol 3-kinase 68D
FBgn0262579	Sarm	2.92268	3.10165e-111	1.50233	4.76666e-33	Sterile alpha and Armadillo motif
FBgn0261549	rdgA	2.53753	1.11484e-110	1.72123	1.65442e-55	retinal degeneration A
FBgn0004656	fs(1)h	2.9059	1.19203e-110	1.81353	9.0726e-48	female sterile (1) homeotic
FBgn0039633	Bicra	3.85466	2.46343e-110	1.88828	6.78491e-30	BRD4 interacting chromatin remodeling complex associated protein
FBgn0261617	nej	3.77604	3.40177e-110	1.86779	2.15386e-30	nejire
FBgn0037025	Spc105R	2.07455	4.13761e-110	1.41035	4.56159e-56	Spc105-related
FBgn0261797	Dhc64C	3.29431	4.68328e-110	1.2843	2.34641e-19	Dynein heavy chain 64C
FBgn0027287	Gmap	1.86068	5.38533e-110	1.03287	9.39614e-38	Golgi microtubule-associated protein
FBgn0015609	CadN	3.56175	1.40478e-109	1.14707	4.04441e-14	Cadherin-N
FBgn0036814	CG14073	2.1347	1.61814e-109	0.708898	2.45304e-14	-
FBgn0034734	CG4554	2.76988	2.19725e-109	1.35774	1.05354e-29	-
FBgn0051935	Rab3GAP1	1.36501	2.61801e-109	0.692271	5.99801e-31	RAB3 GTPase activating protein catalytic subunit 1
FBgn0263289	scrib	2.46194	2.71534e-109	1.38443	1.43235e-38	scribble
FBgn0087008	e(y)3	3.81595	3.59714e-109	2.25676	1.76236e-42	enhancer of yellow 3
FBgn0260935	Vps15	1.90251	4.96232e-109	0.969394	9.19432e-32	Vacuolar protein sorting 15
FBgn0003464	sol	2.32416	7.99276e-109	1.41702	6.97954e-45	small optic lobes
FBgn0043884	mask	3.9941	1.45694e-108	1.88141	2.78649e-27	multiple ankyrin repeats single KH domain
FBgn0033352	PAN2	1.63978	3.23324e-108	0.616833	8.19053e-18	Poly(A)-binding protein-dependent poly(A) ribonuclease 2
FBgn0015279	Pi3K92E	2.01388	7.6641e-108	0.92181	1.11429e-25	Phosphatidylinositol 3-kinase 92E
FBgn0023531	CG32809	3.05116	1.20296e-107	1.57526	1.73639e-32	-
FBgn0262872	milt	2.55801	1.24836e-107	1.92064	1.08187e-66	milton
FBgn0031118	RhoGAP19D	3.52692	1.3917e-107	1.82126	2.88262e-32	Rho GTPase activating protein at 19D
FBgn0264326	PolE1	1.73958	2.19658e-107	0.895859	5.86347e-32	DNA polymerase epsilon subunit 1
FBgn0003575	su(sable)	2.68872	4.18323e-107	2.64294	2.38504e-112	suppressor of sable
FBgn0002466	sti	1.94836	5.52947e-107	0.973695	4.29718e-30	sticky
FBgn0040752	Prosap	2.49499	2.61417e-106	1.4758	2.20573e-41	Prosap
FBgn0037094	CG7611	1.27646	5.28317e-106	0.977587	2.85759e-67	-
FBgn0036340	Srrm1	1.52178	5.70959e-106	0.922536	4.8454e-43	Serine-arginine repetitive matrix 1
FBgn0037831	Cap-H2	2.30857	1.05535e-105	1.32739	5.84032e-39	Chromosome associated protein H2
FBgn0030286	Gapvd1	1.99745	1.99812e-105	1.05971	2.90773e-33	GTPase activating protein and VPS9 domains 1
FBgn0004373	fwd	2.38293	2.0885e-105	1.3379	4.2024e-37	four wheel drive
FBgn0039602	CG1647	1.47284	2.0885e-105	1.21505	1.07155e-76	-
FBgn0288310	mv	3.34685	3.79174e-105	1.38354	1.00099e-20	mauve
FBgn0043903	dome	2.67353	5.57803e-105	1.45573	7.05075e-35	domeless
FBgn0037541	CG2747	2.28856	1.90229e-104	1.27007	5.89542e-36	-
FBgn0263490	mld	3.23774	2.04476e-104	1.94284	7.98501e-42	molting defective
FBgn0028500	Rich	1.93862	2.3693e-104	1.03566	2.35229e-33	RIC1 homolog
FBgn0086908	egg	2.79124	3.06296e-104	3.11983	2.01044e-140	eggless
FBgn0035106	rno	3.46876	4.12383e-104	1.76557	2.2378e-30	rhinoceros
FBgn0044323	Cka	1.3578	4.25172e-104	0.847551	1.944e-44	Connector of kinase to AP-1
FBgn0023458	Rbcn-3A	3.90174	4.69155e-104	1.65575	1.64998e-21	Rabconnectin-3A
FBgn0053182	Kdm4B	2.4072	4.78764e-104	1.18258	1.42197e-28	Lysine demethylase 4B
FBgn0039120	Nup98-96	2.90317	5.27303e-104	1.74999	5.0922e-42	Nucleoporin 98-96kD
FBgn0031698	Ncoa6	2.72318	1.32122e-103	1.31289	2.87389e-27	Nuclear receptor coactivator 6
FBgn0010355	Taf1	2.21195	1.97195e-103	1.558	1.90606e-56	TBP-associated factor 1
FBgn0260748	CG5004	2.07191	2.02883e-103	1.27318	2.57536e-43	-
FBgn0039590	CG10011	2.76531	2.04525e-103	1.25939	1.70377e-24	-
FBgn0259734	Nost	3.55005	2.04761e-103	2.52372	1.3581e-57	Nostrin
FBgn0000405	CycB	1.56305	2.36395e-103	1.93634	8.46357e-173	Cyclin B
FBgn0259166	CG42271	1.91994	3.5797e-103	1.05325	1.13842e-34	-
FBgn0026083	tyf	1.7307	9.68144e-103	1.16452	2.60354e-51	twenty-four
FBgn0264895	RapGAP1	1.92723	1.27347e-102	1.07084	2.29151e-35	Rap GTPase activating protein 1
FBgn0260936	scny	1.68359	1.74068e-102	0.855966	8.80799e-30	scrawny
FBgn0026059	Mhcl	3.4824	5.48408e-102	1.59356	2.27908e-24	Myosin heavy chain-like
FBgn0015477	Rme-8	2.3598	7.68362e-102	1.27065	4.10834e-33	Receptor mediated endocytosis 8
FBgn0037716	Son	1.92183	1.42092e-101	0.87432	5.81538e-24	Son RNA binding protein
FBgn0000414	Dab	3.60814	1.65593e-101	1.78407	4.52312e-28	Disabled
FBgn0015600	toc	2.19872	2.3112e-101	1.07924	1.30722e-27	toucan
FBgn0003041	pbl	1.89814	3.87044e-101	1.35517	1.12684e-56	pebble
FBgn0040236	c11.1	2.49062	1.88032e-100	1.30281	6.49788e-31	c11.1
FBgn0032467	Ube4B	2.40207	1.98729e-100	2.01325	4.54832e-77	Ubiquitination factor E4B
FBgn0035266	Gk2	1.46153	2.14822e-100	0.821256	3.51961e-35	Glycerol kinase 2
FBgn0001324	kto	2.44726	5.73744e-100	0.988697	5.6748e-19	kohtalo
FBgn0085430	Dora	3.51999	6.70893e-100	1.57416	7.69892e-23	Dorado
FBgn0052702	Cubn	3.58751	8.4486e-100	1.22379	2.83373e-15	Cubilin
FBgn0030336	CG1578	1.34079	8.86473e-100	0.803333	1.15196e-39	-
FBgn0260655	l(3)76BDm	2.12626	1.27437e-99	0.888723	4.32657e-20	lethal (3) 76BDm
FBgn0030680	CG8944	1.58103	1.79128e-99	1.39417	1.41666e-83	-
FBgn0025743	mbt	1.3574	2.53972e-99	0.980992	1.29934e-56	mushroom bodies tiny
FBgn0283499	InR	3.20491	2.59074e-99	1.45204	2.46372e-23	Insulin-like receptor
FBgn0061200	Nup153	3.09754	4.46845e-99	1.88802	6.27026e-41	Nucleoporin 153kD
FBgn0020379	Rfx	2.32452	4.99187e-99	0.792809	6.8486e-14	Rfx
FBgn0003189	r	3.32389	5.01661e-99	1.20058	2.94693e-15	rudimentary
FBgn0029895	CG14441	2.07456	6.66303e-99	1.06331	2.75603e-29	-
FBgn0011474	Set8	1.7305	7.78553e-99	1.50681	2.13927e-81	SET domain containing 8
FBgn0025626	CG4281	2.6241	1.2291e-98	2.42722	8.33673e-92	-
FBgn0003520	stau	2.38458	2.62066e-98	1.14625	9.01864e-26	staufen
FBgn0264324	spg	2.36792	2.6277e-98	1.04562	5.58491e-22	sponge
FBgn0030343	ATP7	2.56544	2.85032e-98	1.55806	2.54702e-40	ATP7
FBgn0026179	siz	1.62684	4.09165e-98	0.776929	2.45712e-25	schizo
FBgn0032748	CG10492	2.83605	5.39372e-98	1.61022	2.50966e-35	-
FBgn0034644	Ip6k	3.13252	5.64314e-98	2.45728	4.89986e-66	Inositol hexakisphosphate kinase
FBgn0005596	yem	1.72843	6.2985e-98	1.00326	9.57992e-37	yemanuclein
FBgn0287478	Camta	2.61052	6.81109e-98	1.68802	2.51479e-45	Calmodulin-binding transcription activator
FBgn0262527	nsl1	2.30931	1.11879e-97	1.53126	1.80517e-47	non-specific lethal 1
FBgn0030766	mthl1	3.00275	1.6934e-97	1.42022	6.84121e-25	methuselah-like 1
FBgn0011230	poe	3.05765	1.97707e-97	0.821227	8.48092e-09	purity of essence
FBgn0052982	CG32982	2.34113	6.22722e-97	1.20924	1.56369e-29	-
FBgn0035001	Slik	1.55777	7.4808e-97	0.843596	8.14145e-32	Sterile20-like kinase
FBgn0000117	arm	1.86892	1.00071e-96	1.28324	2.69579e-50	armadillo
FBgn0259168	mnb	1.78827	1.23464e-96	1.3966	1.57907e-64	minibrain
FBgn0001316	klar	2.66862	1.27557e-96	1.39213	1.29247e-29	klarsicht
FBgn0287725	sov	3.99754	1.70565e-96	2.95422	5.3205e-58	small ovary
FBgn0033688	Prp8	2.11616	1.75225e-96	0.813039	1.24075e-16	pre-mRNA processing factor 8
FBgn0085370	Pde11	2.63108	1.89894e-96	1.27449	1.10077e-25	Phosphodiesterase 11
FBgn0266717	Bruce	3.79593	2.0244e-96	1.2118	7.50645e-12	BIR repeat containing ubiquitin-conjugating enzyme
FBgn0032817	CG10631	3.17849	2.21121e-96	1.3928	3.00448e-21	-
FBgn0035021	CG4622	2.28666	3.88756e-96	3.09214	3.30916e-180	-
FBgn0031981	Megf8	3.46944	5.13359e-96	1.61662	7.97749e-24	Multiple EGF like domains 8
FBgn0260486	Ziz	2.66198	5.75861e-96	1.33957	1.42057e-27	Zizimin
FBgn0004370	Ptp10D	2.50777	6.12877e-96	1.53913	3.53242e-40	Protein tyrosine phosphatase 10D
FBgn0026313	X11L	2.61831	6.56761e-96	1.35866	4.13653e-29	X11L
FBgn0029840	raptor	3.04117	7.84182e-96	1.34016	2.37126e-21	raptor
FBgn0032481	CG16972	2.62205	9.28223e-96	1.54157	6.43605e-37	-
FBgn0027548	nito	1.7883	2.1442e-95	1.30399	1.24673e-55	spenito
FBgn0027655	htt	4.0706	2.1442e-95	2.56308	4.05525e-42	huntingtin
FBgn0039338	XNP	2.08725	4.40451e-95	1.07463	2.04647e-28	XNP
FBgn0051151	wge	3.10668	8.32318e-95	1.53893	2.34973e-26	winged eye
FBgn0039654	Brd8	1.87467	9.83931e-95	1.60081	5.03535e-74	Bromodomain containing 8
FBgn0003016	osp	2.4033	1.69434e-94	1.40731	3.80358e-36	outspread
FBgn0035237	CG13917	3.03799	4.63824e-94	1.5568	6.90883e-28	-
FBgn0265523	Smr	3.91775	4.72412e-94	1.69059	3.76026e-20	Smrter
FBgn0030366	Usp7	2.34221	5.30306e-94	1.59893	2.27167e-48	Ubiquitin-specific protease 7
FBgn0004650	fs(1)N	2.27921	1.04603e-93	1.13746	2.07967e-26	female sterile (1) Nasrat
FBgn0035142	Hipk	2.64834	1.4834e-93	1.4847	5.95635e-33	Homeodomain interacting protein kinase
FBgn0039528	dsd	2.85313	1.65474e-93	1.44136	5.24706e-27	distracted
FBgn0029006	Smurf	1.51698	5.42475e-93	1.0537	2.46176e-49	SMAD specific E3 ubiquitin protein ligase
FBgn0005536	Mbs	1.41471	5.73884e-93	0.590346	1.16527e-18	Myosin binding subunit
FBgn0027620	Acf	1.38686	7.19221e-93	0.689555	6.09594e-26	ATP-dependent chromatin assembly factor large subunit
FBgn0260003	Dys	3.01662	7.23848e-93	0.702838	1.27118e-06	Dystrophin
FBgn0002431	hyd	2.77268	7.46338e-93	1.57422	1.7236e-33	hyperplastic discs
FBgn0263144	bin3	1.43634	8.12301e-93	0.844931	9.45097e-36	bicoid-interacting protein 3
FBgn0038547	CG17803	2.72063	8.60175e-93	1.35307	1.10574e-27	-
FBgn0264953	Piezo	2.62127	1.16904e-92	1.39739	1.1372e-29	Piezo
FBgn0083962	CG34126	1.85461	1.39186e-92	1.04001	1.50482e-32	-
FBgn0004876	cdi	1.67241	2.33348e-92	1.03117	5.94007e-39	center divider
FBgn0040372	G9a	2.23643	5.75974e-92	0.92229	3.97581e-18	G9a
FBgn0004390	RasGAP1	2.16013	5.84669e-92	1.23627	1.14755e-33	Ras GTPase activating protein 1
FBgn0030974	Flacc	2.18051	6.32629e-92	1.04671	4.19431e-24	Fl(2)d-associated complex component
FBgn0003048	pcx	3.73866	8.77369e-92	1.71332	4.53545e-22	pecanex
FBgn0005198	gig	2.55972	1.7056e-91	1.33696	3.38781e-28	gigas
FBgn0037249	eIF3a	2.15794	1.80256e-91	0.629099	1.32752e-09	eukaryotic translation initiation factor 3 subunit a
FBgn0085451	htk	2.86894	4.5145e-91	1.56329	2.15036e-30	hat-trick
FBgn0030089	AP-1Œ≥	2.1326	5.82714e-91	1.04748	6.63028e-25	Adaptor Protein complex 1
FBgn0261556	CG42674	2.31598	8.92375e-91	1.58299	9.44412e-47	-
FBgn0038872	Nelf-A	1.55896	9.19045e-91	0.866612	2.48785e-31	Negative elongation factor A
FBgn0034240	MESR4	2.79763	9.21769e-91	1.50654	1.34307e-29	Misexpression suppressor of ras 4
FBgn0035498	Fit1	1.38498	9.21769e-91	0.781757	4.33694e-32	Fermitin 1
FBgn0261710	nocte	2.86429	1.14066e-90	1.59782	1.22244e-31	no circadian temperature entrainment
FBgn0262739	AGO1	1.96569	1.30825e-90	1.04279	1.07289e-28	Argonaute-1
FBgn0261647	Axud1	1.93471	1.48968e-90	1.28018	8.44364e-44	AXIN1 up-regulated 1
FBgn0010825	Gug	2.86143	2.53658e-90	2.25319	1.8637e-61	Grunge
FBgn0264449	CG43867	2.85965	3.68607e-90	1.45084	2.71081e-26	-
FBgn0000163	baz	2.32983	4.53825e-90	1.38169	2.52819e-35	bazooka
FBgn0016070	smg	2.32447	5.4335e-90	1.42569	1.13082e-37	smaug
FBgn0030243	CG2186	1.75927	3.13889e-89	1.09007	5.52261e-38	-
FBgn0031420	Atxn7	1.85259	3.28671e-89	1.28915	2.69407e-47	Ataxin 7
FBgn0028538	Sec71	2.04537	4.39768e-89	0.995318	5.5966e-24	Secretory 71
FBgn0259876	Cap-G	1.31769	4.54394e-89	0.729944	1.60235e-30	Chromosome associated protein G
FBgn0052296	Mrtf	2.13323	6.97506e-89	1.52345	9.66348e-50	Myocardin-related transcription factor
FBgn0020621	Pkn	2.38028	7.00052e-89	1.43226	7.46164e-36	Protein kinase N
FBgn0259227	CG42327	2.54641	7.97436e-89	1.20902	6.75046e-23	-
FBgn0261570	raskol	2.89147	8.6498e-89	1.68615	9.55229e-34	raskol
FBgn0261823	Asx	1.76328	1.43692e-88	1.33988	5.74078e-56	Additional sex combs
FBgn0050020	CG30020	3.40378	1.66872e-88	3.09928	5.07843e-80	-
FBgn0003416	sl	2.25834	1.74849e-88	1.14622	8.46541e-26	small wing
FBgn0013732	sced	1.48824	2.01962e-88	0.990165	4.97068e-43	scrambled
FBgn0004598	Fur2	2.57516	4.03304e-88	1.22703	8.39517e-23	Furin 2
FBgn0259685	crb	3.27093	5.59222e-88	1.58301	1.81031e-23	crumbs
FBgn0036714	CG7692	2.22643	5.64397e-88	0.845223	5.75509e-15	-
FBgn0264560	garz	1.62043	7.24404e-88	0.927693	3.87358e-32	gartenzwerg
FBgn0015625	CycB3	2.3663	7.88856e-88	2.85193	3.58388e-138	Cyclin B3
FBgn0033052	SCAP	2.57687	8.86382e-88	1.23557	4.96932e-23	SREBP cleavage activating protein
FBgn0037944	CG6923	2.46016	9.53579e-88	1.00879	3.1772e-17	-
FBgn0038274	Nup93-2	1.57099	1.54948e-87	1.04764	1.49137e-42	Nucleoporin 93kD-2
FBgn0039560	BOD1	1.72547	1.61155e-87	0.755019	2.77027e-19	Biorientation Defective 1
FBgn0267001	Ten-a	3.77932	1.70371e-87	1.52706	3.65782e-17	Tenascin accessory
FBgn0034271	Vps50	1.7067	1.76643e-87	1.07202	3.32531e-38	Vacuolar protein sorting 50
FBgn0004512	Mdr49	2.49401	1.9869e-87	1.19639	2.99397e-23	Multi drug resistance 49
FBgn0003656	sws	2.33318	2.21717e-87	1.26451	7.29116e-29	swiss cheese
FBgn0045035	tefu	2.09894	2.29168e-87	0.965701	3.53892e-21	telomere fusion
FBgn0041092	tai	2.43873	3.14664e-87	1.62411	1.00867e-42	taiman
FBgn0052479	Usp10	2.56354	3.14723e-87	1.49039	5.78737e-33	Ubiquitin specific protease 10
FBgn0265778	PDZ-GEF	2.43378	3.29805e-87	1.26964	8.45092e-27	PDZ domain-containing guanine nucleotide exchange factor
FBgn0259212	cno	3.04228	3.92049e-87	2.11807	1.24514e-46	canoe
FBgn0052529	Hers	3.97279	4.97023e-87	2.17159	2.559e-29	Histone gene-specific Epigenetic Repressor in late S phase
FBgn0052654	Sec16	2.54906	6.96002e-87	1.17896	2.83429e-21	Secretory 16
FBgn0003557	Su(dx)	1.76339	8.93963e-87	1.05828	8.92298e-35	Suppressor of deltex
FBgn0032243	Klp31E	1.5514	1.20618e-86	0.839789	2.89259e-28	Kinesin-like protein at 31E
FBgn0015589	Apc	2.66595	3.02807e-86	1.35929	2.14071e-25	APC-like
FBgn0050015	CG30015	2.83504	3.83625e-86	1.60564	3.17382e-31	-
FBgn0026206	mei-P26	2.23093	4.09173e-86	1.12748	6.39285e-25	meiotic P26
FBgn0264305	CG43783	2.24602	1.00758e-85	1.36371	3.77385e-35	-
FBgn0283503	Neurl4	2.75188	1.50175e-85	1.1498	1.9524e-17	Neuralized E3 ubiquitin protein ligase 4
FBgn0262103	Sik3	2.65857	1.67966e-85	1.20328	3.90539e-20	Salt-inducible kinase 3
FBgn0086694	Bre1	1.54537	1.88829e-85	0.931619	1.59019e-34	Bre1
FBgn0020278	loco	3.36032	3.13601e-85	2.99392	1.04095e-73	locomotion defects
FBgn0263197	Patronin	3.18654	3.53983e-85	1.53533	1.45524e-22	Patronin
FBgn0000319	Chc	2.19274	4.09764e-85	1.1227	2.96044e-25	Clathrin heavy chain
FBgn0027580	PCB	1.50719	4.84242e-85	0.773218	2.85335e-25	Pyruvate carboxylase
FBgn0038320	Cyfip	2.1236	5.68454e-85	1.29002	6.45768e-35	Cytoplasmic FMR1 interacting protein
FBgn0023510	Rbcn-3B	2.01877	6.16939e-85	0.825012	1.50752e-16	Rabconnectin-3B
FBgn0086690	Plp	3.64578	6.95246e-85	2.19204	2.9858e-34	Pericentrin-like protein
FBgn0036715	Cad74A	2.97869	8.53056e-85	1.41791	5.7426e-23	Cadherin 74A
FBgn0026239	gukh	2.02042	1.09238e-84	1.17318	6.72693e-32	GUK-holder
FBgn0026428	HDAC6	2.05591	1.30349e-84	1.08866	9.28851e-27	Histone deacetylase 6
FBgn0036365	cmb	3.95983	1.55829e-84	2.08055	1.96431e-26	combover
FBgn0038651	Epg5	2.54074	1.87345e-84	1.49776	8.36767e-33	ectopic P-granules autophagy protein 5
FBgn0033454	CG1671	1.26035	2.43012e-84	0.680774	2.98402e-27	-
FBgn0051224	CG31224	2.37696	2.743e-84	1.24979	2.60168e-26	-
FBgn0003165	pum	3.03606	3.10747e-84	1.50848	1.26397e-23	pumilio
FBgn0031077	THADA	2.78432	4.00699e-84	1.67212	5.37116e-34	THADA
FBgn0035793	CG7546	2.01325	5.60699e-84	1.10533	1.92556e-28	-
FBgn0033460	Sec24AB	2.0634	1.60333e-83	1.24292	8.96707e-34	Secretory 24AB
FBgn0261873	sdt	2.47273	2.03316e-83	1.5743	1.57338e-37	stardust
FBgn0263933	ebi	1.83248	6.23645e-83	1.11813	2.3157e-34	ebi
FBgn0030354	Upf1	1.63106	7.44296e-83	0.980849	2.51872e-33	Upf1 RNA helicase
FBgn0030466	CG15744	2.61529	7.63428e-83	1.53582	5.8642e-32	-
FBgn0004655	wapl	2.55448	1.31072e-82	0.969438	4.7022e-14	wings apart-like
FBgn0034253	CG10936	3.11418	1.80549e-82	1.355	7.05953e-19	-
FBgn0025802	Sbf	2.33107	1.91695e-82	1.08815	1.33484e-20	SET domain binding factor
FBgn0036574	elg1	1.72403	2.46651e-82	1.01343	8.95558e-32	enhanced level of genomic instability 1
FBgn0000376	crm	1.45685	5.41766e-82	0.640523	2.98043e-18	cramped
FBgn0034590	Magi	2.18624	6.17577e-82	1.44036	2.3378e-39	Magi
FBgn0034618	CG9485	2.5002	7.36244e-82	1.2528	2.35218e-23	-
FBgn0030505	NFAT	1.48556	8.27318e-82	1.10272	7.07362e-49	NFAT nuclear factor
FBgn0032208	Ufd4	2.60416	8.34331e-82	1.39949	1.22045e-26	Ubiquitin fusion-degradation 4-like
FBgn0030808	RhoGAP15B	1.8214	2.42215e-81	1.05568	1.57068e-30	Rho GTPase activating protein at 15B
FBgn0026376	Rgl	1.97673	3.00036e-81	1.01367	3.32044e-24	Ral guanine nucleotide dissociation stimulator-like
FBgn0016641	PTP-ER	3.24724	3.09377e-81	1.96559	3.02607e-33	Protein tyrosine phosphatase-ERK/Enhancer of Ras1
FBgn0002905	PolQ	1.31481	3.31647e-81	0.952635	8.50705e-46	DNA polymerase theta
FBgn0266129	lov	2.84134	5.88065e-81	1.13429	3.64427e-16	jim lovell
FBgn0036663	CG9674	2.60796	1.24944e-80	1.04647	3.03423e-15	-
FBgn0037897	CG5270	1.95429	1.28869e-80	0.999359	6.75047e-24	-
FBgn0004795	retn	0.809166	1.63886e-80	0.705312	3.91871e-66	retained
FBgn0039831	CG12054	1.73703	1.99321e-80	1.27635	1.10442e-47	-
FBgn0032821	CdGAPr	3.5232	2.49973e-80	2.38959	6.42215e-41	Cd GTPase activating protein-related
FBgn0013810	Dhc36C	2.87902	2.57164e-80	1.05266	3.70046e-13	Dynein heavy chain at 36C
FBgn0025836	RhoGAP1A	1.66777	3.02463e-80	0.878714	3.67795e-25	Rho GTPase activating protein at 1A
FBgn0036913	Usp32	2.40531	3.30647e-80	1.26047	6.32336e-25	Ubiquitin specific protease 32
FBgn0023097	bon	1.70958	3.38785e-80	0.824909	2.63592e-21	bonus
FBgn0031216	Zir	2.80939	3.62036e-80	1.25875	1.38651e-18	Zizimin-related
FBgn0023508	Ocrl	2.09977	4.18132e-80	1.36996	9.64554e-38	Oculocerebrorenal syndrome of Lowe
FBgn0087013	KaryŒ≤3	1.35426	1.20136e-79	0.944516	1.02839e-42	Karyopherin beta 3
FBgn0011592	fra	2.53342	2.042e-79	1.33606	4.75972e-25	frazzled
FBgn0029706	CG3626	1.45975	2.99758e-79	0.712308	2.09738e-21	-
FBgn0039182	Rrp5	1.57658	3.07966e-79	1.11873	7.71784e-44	Ribosomal RNA Processing 5
FBgn0000562	egl	1.41331	3.13909e-79	0.775303	9.51327e-27	egalitarian
FBgn0050011	gem	1.60401	3.59366e-79	0.809872	7.4318e-23	gemini
FBgn0029157	ssh	1.91861	4.23438e-79	1.40681	9.58201e-47	slingshot
FBgn0260397	Su(var)3-3	1.55105	5.63255e-79	0.868462	1.0319e-27	Suppressor of variegation 3-3
FBgn0259176	bun	1.83087	7.66425e-79	1.22589	4.00672e-39	bunched
FBgn0039026	CG7029	3.17696	1.00254e-78	1.37871	3.22636e-17	-
FBgn0032940	Mondo	1.75208	1.70758e-78	1.43093	5.19115e-57	Mondo
FBgn0039466	CG5521	2.3715	1.81636e-78	1.06431	2.9783e-18	-
FBgn0026375	RhoGAPp190	2.58702	1.87028e-78	0.986391	1.61745e-13	Rho GTPase activating protein p190
FBgn0261244	inaE	2.11006	2.4486e-78	1.31058	1.30105e-33	inactivation no afterpotential E
FBgn0033194	Vps13	2.92067	2.55764e-78	1.48412	5.19227e-23	Vacuolar protein sorting 13
FBgn0030087	CG7766	1.64147	3.48828e-78	0.963702	4.25301e-30	-
FBgn0265194	Trpm	3.31252	4.31232e-78	1.54601	1.35087e-19	Transient receptor potential cation channel
FBgn0283657	Tlk	2.19964	5.4076e-78	1.75793	1.23058e-54	Tousled-like kinase
FBgn0261648	salm	2.42604	7.77985e-78	1.26212	3.01135e-24	spalt major
FBgn0026015	Top3Œ≤	1.49222	1.0704e-77	0.590104	2.8039e-14	Topoisomerase 3beta
FBgn0037717	CG8301	1.99381	1.09131e-77	0.742084	7.32378e-13	-
FBgn0020386	Pdk1	1.9509	1.22766e-77	1.02117	4.35865e-24	Phosphoinositide-dependent kinase 1
FBgn0034975	enok	2.30934	1.57382e-77	0.966262	7.50314e-16	enoki mushroom
FBgn0259789	zld	2.72698	3.81718e-77	1.85683	1.32998e-39	zelda
FBgn0000541	E(bx)	2.14767	4.39339e-77	1.11509	1.46084e-23	Enhancer of bithorax
FBgn0264495	gpp	3.59419	4.40838e-77	1.69392	1.13292e-19	grappa
FBgn0033246	ACC	2.33495	5.15865e-77	1.2069	2.39628e-23	Acetyl-CoA carboxylase
FBgn0034049	bdg	2.20279	1.0627e-76	1.51272	7.59414e-40	bedraggled
FBgn0020279	lig	2.36216	1.63379e-76	1.27745	2.8454e-25	lingerer
FBgn0261859	CG42788	2.89963	1.73534e-76	1.39165	3.11987e-20	-
FBgn0004698	Xpc	3.06776	1.92883e-76	2.71706	1.70627e-65	Xeroderma pigmentosum
FBgn0283531	Duox	2.09606	2.05984e-76	0.982928	2.61184e-19	Dual oxidase
FBgn0286567	gry	1.8958	2.24423e-76	0.903644	6.9187e-20	gryzun
FBgn0261938	PolrMT	1.8239	2.26528e-76	0.896184	5.01487e-21	RNA polymerase mitochondrial
FBgn0003459	stwl	2.06021	2.5851e-76	1.50005	1.79183e-44	stonewall
FBgn0020626	Osbp	1.61262	2.77645e-76	0.844896	1.15797e-23	Oxysterol binding protein
FBgn0039696	Rnb	1.37528	3.13321e-76	0.923177	1.8408e-37	R and B
FBgn0264090	CG43759	1.00068	3.8222e-76	0.654282	4.02647e-35	-
FBgn0085412	kmr	3.75193	5.36905e-76	1.56956	1.02801e-15	kramer
FBgn0013576	mtd	2.05895	5.55417e-76	1.06598	4.12686e-23	mustard
FBgn0030858	IntS2	1.82853	5.73779e-76	0.910283	1.95208e-21	Integrator 2
FBgn0010473	tutl	3.1658	7.98737e-76	1.57434	4.76574e-22	turtle
FBgn0261698	SLO2	2.34215	9.1467e-76	1.23399	7.55056e-24	slowpoke 2
FBgn0004875	enc	1.9554	9.8078e-76	1.17758	1.09565e-30	encore
FBgn0263706	CG43658	2.08388	9.95461e-76	1.05004	6.76204e-22	-
FBgn0039858	CycG	1.43549	1.13684e-75	0.690967	4.59334e-20	Cyclin G
FBgn0037205	BoYb	2.49546	1.67281e-75	1.81125	9.53961e-44	Brother of Yb
FBgn0024277	trio	3.17913	2.31616e-75	1.159	5.19374e-12	trio
FBgn0038223	Afti	1.96135	2.31616e-75	1.54608	3.76214e-51	Aftiphilin
FBgn0022768	Pp2C1	2.18892	2.49063e-75	1.31062	3.36585e-30	Protein phosphatase 2C
FBgn0000546	EcR	1.77905	2.66517e-75	1.03314	2.0474e-28	Ecdysone receptor
FBgn0260634	eIF4G2	1.96907	2.88883e-75	1.06526	6.95802e-25	eukaryotic translation initiation factor 4G2
FBgn0037379	CG10979	1.90938	3.37568e-75	1.36557	2.23246e-42	-
FBgn0020647	KrT95D	1.9202	4.62988e-75	0.95628	3.16509e-21	Krueppel target at 95D
FBgn0260933	rempA	2.78179	5.81116e-75	1.08109	1.83409e-14	reduced mechanoreceptor potential A
FBgn0035842	Setx	1.98016	6.11293e-75	1.20004	1.00354e-30	Senataxin
FBgn0000404	CycA	1.49397	7.06143e-75	2.08373	1.61688e-157	Cyclin A
FBgn0035073	CG16896	1.60653	1.29927e-74	1.39688	8.43496e-61	-
FBgn0003891	tud	2.62178	2.799e-74	1.06532	2.03037e-14	tudor
FBgn0036032	CG16711	1.88699	3.26232e-74	0.727774	4.09019e-13	-
FBgn0005386	ash1	2.45462	4.01184e-74	1.34423	4.20977e-25	absent
FBgn0052218	lncRNA:CR32218	2.36968	4.65263e-74	1.39481	9.34025e-29	long non-coding RNA:CR32218
FBgn0039056	CenB1A	1.75865	5.43771e-74	1.26831	2.75938e-42	Centaurin beta 1A
FBgn0032120	CG33298	2.55536	5.76149e-74	1.02052	6.28816e-14	-
FBgn0037093	Cdk12	2.29375	8.43796e-74	1.39864	1.20245e-30	Cyclin-dependent kinase 12
FBgn0261786	mi	3.11975	1.02318e-73	2.63464	1.74844e-57	minus
FBgn0029114	Tollo	1.77864	1.23307e-73	0.941273	2.50055e-23	Tollo
FBgn0035574	RhoGEF64C	2.97812	1.96021e-73	1.45991	2.31239e-21	Rho guanine nucleotide exchange factor at 64C
FBgn0250850	rig	1.20062	2.98171e-73	0.624861	1.8086e-22	rigor mortis
FBgn0041171	ago	2.03725	3.64493e-73	1.19081	4.84271e-28	archipelago
FBgn0003483	spn-E	2.16856	4.03693e-73	1.41468	1.48438e-34	spindle E
FBgn0267351	Topors	1.33079	5.82769e-73	0.686908	5.50575e-22	Topoisomerase I-interacting protein
FBgn0260794	ctrip	2.53739	6.87056e-73	1.20828	5.43421e-19	circadian trip
FBgn0043456	Ndf	1.46219	8.35417e-73	1.40599	4.22886e-73	Nucleosome-destabilizing factor
FBgn0036882	CG9279	2.62524	8.57935e-73	1.22573	5.11129e-19	-
FBgn0052113	Vps13D	2.45314	9.52003e-73	1.14957	2.02075e-18	Vacuolar protein sorting 13D
FBgn0283682	Ge-1	1.61051	1.24206e-72	0.803378	1.30688e-20	Ge-1
FBgn0004860	ph-d	2.17069	1.46835e-72	1.44458	1.55321e-35	polyhomeotic distal
FBgn0010488	NAT1	2.0487	1.8643e-72	1.55396	7.50025e-46	NAT1
FBgn0025866	CalpB	2.77211	1.90439e-72	2.51702	5.5339e-65	Calpain-B
FBgn0032456	MRP	2.47356	2.51578e-72	1.32459	1.7169e-23	Multidrug-Resistance like Protein 1
FBgn0024329	Mekk1	1.97467	2.60005e-72	0.962275	1.12992e-19	Mekk1
FBgn0027335	Rip11	1.41836	3.02209e-72	0.789375	3.86273e-25	Rab11 interacting protein
FBgn0083969	CG34133	2.27566	9.49795e-72	1.28435	9.61655e-26	-
FBgn0003175	px	2.48311	1.02512e-71	1.27015	2.13486e-21	plexus
FBgn0052533	CG32533	2.31742	2.23731e-71	1.27621	1.70377e-24	-
FBgn0264089	sli	3.58599	3.53573e-71	1.72004	5.60509e-19	slit
FBgn0024150	Ac78C	2.70779	4.74253e-71	1.41561	2.03677e-22	Adenylyl cyclase 78C
FBgn0261547	Exn	1.93943	7.02608e-71	1.1468	1.45993e-27	Ephexin
FBgn0004463	Polr3B	1.47378	9.87895e-71	1.08139	4.04299e-41	RNA polymerase III subunit B
FBgn0028509	CenG1A	2.55308	1.1172e-70	1.21054	2.28982e-18	Centaurin gamma 1A
FBgn0031820	Daxx	3.48563	1.12341e-70	2.82346	7.79241e-51	Daxx-like protein
FBgn0038968	CG12499	1.85906	1.64225e-70	0.866873	1.07644e-17	-
FBgn0034180	Ehbp1	1.77976	1.7717e-70	0.981569	3.73519e-24	Eps15 homology domain containing protein-binding protein 1
FBgn0004861	ph-p	2.5384	2.02756e-70	1.48991	2.45525e-27	polyhomeotic proximal
FBgn0011710	Septin1	2.0045	2.13317e-70	2.36353	5.24674e-105	Septin 1
FBgn0261261	plx	2.4488	2.53137e-70	1.40198	5.85109e-26	pollux
FBgn0263705	Myo10A	3.76582	2.65994e-70	1.36318	3.05105e-11	Myosin 10A
FBgn0034570	CG10543	2.31905	2.69915e-70	1.33203	4.30074e-26	-
FBgn0036043	Ae2	2.47599	3.22696e-70	1.31032	2.44421e-22	Anion exchanger 2
FBgn0086444	l(2)37Cb	1.90796	3.80783e-70	1.25941	1.09301e-33	lethal (2) 37Cb
FBgn0031390	tho2	1.64873	4.03183e-70	0.861417	9.73571e-22	tho2
FBgn0039260	Smg6	1.63827	4.50525e-70	1.02931	1.01182e-30	Smg6
FBgn0020251	sfl	2.54889	5.57937e-70	1.44082	3.01444e-25	sulfateless
FBgn0261554	CG42672	2.337	5.74218e-70	1.1857	1.43233e-20	-
FBgn0027603	Ulp1	1.73601	7.43653e-70	0.933881	6.74895e-23	Ulp1
FBgn0029525	CG18273	1.62903	8.23988e-70	0.957817	5.51327e-27	-
FBgn0033806	FLASH	3.47869	9.18377e-70	3.46504	8.13465e-75	FLICE-associated huge protein
FBgn0003731	Egfr	2.97742	9.37347e-70	1.58487	1.20751e-22	Epidermal growth factor receptor
FBgn0033313	Cirl	2.91688	1.24035e-69	1.46977	3.20248e-20	Calcium-independent receptor for alpha-latrotoxin
FBgn0028487	f-cup	1.71335	1.96439e-69	0.871077	2.10904e-20	flyers-cup
FBgn0029997	CG2258	1.92956	1.99641e-69	1.29245	1.92603e-34	-
FBgn0030018	slpr	1.41945	2.20296e-69	0.689613	9.04534e-19	slipper
FBgn0266418	wake	1.9007	3.5751e-69	1.23047	4.15118e-32	wide awake
FBgn0024806	DIP2	2.41617	4.35974e-69	1.50044	9.21905e-30	DISCO Interacting Protein 2
FBgn0028371	jbug	2.90302	6.81121e-69	1.36599	8.03302e-18	jitterbug
FBgn0261954	east	2.28603	6.87857e-69	1.61236	6.71029e-38	enhanced adult sensory threshold
FBgn0036980	RhoBTB	1.68739	7.28088e-69	1.10771	6.46478e-33	Rho-related BTB domain containing
FBgn0259173	corn	1.91626	9.31709e-69	1.13742	8.45092e-27	cornetto
FBgn0013726	pnut	3.068	1.03708e-68	3.62421	1.64341e-103	peanut
FBgn0035420	hob	2.73615	1.08983e-68	1.4156	5.73944e-21	hobbit
FBgn0000542	ec	3.01693	1.0977e-68	1.57147	2.41035e-21	echinus
FBgn0034060	Tmem131	2.68473	1.25425e-68	1.40103	2.58132e-21	Transmembrane protein 131
FBgn0038478	cal1	1.91539	1.46801e-68	1.36388	2.23433e-38	chromosome alignment defect 1
FBgn0004449	Ten-m	4.04525	1.58301e-68	1.96603	1.031e-18	Tenascin major
FBgn0263111	cac	2.31558	1.78208e-68	1.11253	5.29488e-19	cacophony
FBgn0020261	pcm	1.92899	2.85408e-68	1.12003	7.43854e-26	pacman
FBgn0029763	Usp16-45	1.9568	2.91097e-68	1.10929	9.90977e-25	Ubiquitin specific protease 16/45
FBgn0037327	PEK	2.25648	3.0731e-68	1.33978	5.3916e-27	pancreatic eIF-2alpha kinase
FBgn0034598	CG4266	2.57076	3.3264e-68	1.68015	2.06271e-32	-
FBgn0031985	mon2	1.63934	4.83119e-68	0.844923	1.48272e-20	monensin sensitivity 2
FBgn0003507	srp	2.74079	6.06877e-68	1.57682	1.72756e-25	serpent
FBgn0032363	Dlg5	2.43395	9.99522e-68	1.17847	2.82128e-18	Discs large 5
FBgn0025633	spdi	2.55527	1.04512e-67	1.76121	1.24845e-35	split discs
FBgn0052251	Claspin	2.04488	1.05154e-67	0.817237	7.78744e-13	Claspin
FBgn0261618	larp	2.08493	2.37546e-67	1.05986	6.85033e-20	La related protein
FBgn0003892	ptc	2.93384	2.42542e-67	1.4252	1.20284e-18	patched
FBgn0261532	cdm	1.91034	2.62892e-67	1.06442	1.34674e-23	cadmus
FBgn0002774	mle	1.73754	3.64127e-67	1.08301	7.62428e-29	maleless
FBgn0037720	CG8312	1.51422	4.66823e-67	0.852815	6.62523e-24	-
FBgn0039668	Trc8	1.80218	4.82025e-67	1.07314	1.46384e-26	TRC8 ring finger protein
FBgn0051678	CG31678	2.82602	4.89416e-67	1.36168	5.40085e-18	-
FBgn0000479	dnc	2.45372	6.04431e-67	1.31486	7.61769e-22	dunce
FBgn0036534	DCP2	2.23231	6.95348e-67	1.61234	1.59774e-38	Decapping protein 2
FBgn0260399	gwl	1.27051	7.98852e-67	1.00463	1.1796e-45	greatwall
FBgn0001206	Hmr	2.49701	8.04711e-67	2.32546	6.52114e-63	Hybrid male rescue
FBgn0001250	if	3.17801	9.66802e-67	1.27853	6.53668e-14	inflated
FBgn0029992	Upf2	1.49507	1.16609e-66	0.828912	5.29199e-23	Upf2
FBgn0266083	ocm	2.57756	1.53174e-66	1.34219	1.41389e-20	over compensating males
FBgn0031606	CG15439	1.45281	1.64793e-66	1.00319	8.86413e-35	-
FBgn0066101	LpR1	2.43033	2.15109e-66	1.4192	1.74077e-25	Lipophorin receptor 1
FBgn0033987	ckn	2.41789	2.15665e-66	1.91884	1.68514e-44	caskin
FBgn0027602	CG8611	1.48086	2.76269e-66	1.07417	4.34907e-38	-
FBgn0000317	ck	2.32354	3.0497e-66	0.988211	4.40032e-14	crinkled
FBgn0261278	grp	1.30942	3.37747e-66	0.652608	7.83101e-19	grapes
FBgn0032717	CG10600	1.3253	4.06354e-66	0.589235	3.50251e-15	-
FBgn0024365	CG12773	1.72978	5.36686e-66	1.05037	3.48963e-27	-
FBgn0031023	CG14200	1.77752	5.76361e-66	0.957057	1.07687e-21	-
FBgn0261811	pico	1.71632	6.08889e-66	1.04083	3.63086e-27	pico
FBgn0003525	stg	1.82236	7.72172e-66	1.2818	5.14859e-36	string
FBgn0020385	pug	1.3277	1.35777e-65	0.852025	2.19011e-29	pugilist
FBgn0039904	Hcf	1.40359	1.46235e-65	0.751029	2.70495e-21	Host cell factor
FBgn0035918	Cdc6	3.17966	1.49907e-65	3.26394	8.56221e-75	Cdc6
FBgn0025815	Mcm6	1.54961	1.62211e-65	1.22224	1.22286e-44	Minichromosome maintenance 6
FBgn0036746	Crtc	2.3812	1.79446e-65	1.8699	3.0226e-44	CREB-regulated transcription coactivator
FBgn0004367	mei-41	2.53143	1.87795e-65	1.26296	1.04652e-18	meiotic 41
FBgn0003733	tor	2.73978	2.00842e-65	1.88241	3.13274e-34	torso
FBgn0051158	Efa6	1.71831	2.26578e-65	1.1155	1.2636e-30	Exchange factor for Arf 6
FBgn0262866	S6kII	1.14068	2.44794e-65	0.702899	2.74968e-27	Ribosomal protein S6 kinase II
FBgn0002932	neur	2.36602	2.49382e-65	2.01421	1.49524e-51	neuralized
FBgn0004859	ci	2.61471	3.30936e-65	0.783531	1.68516e-07	cubitus interruptus
FBgn0034025	Pgant1	1.68064	3.56659e-65	0.94956	2.0333e-23	Polypeptide N-Acetylgalactosaminyltransferase 1
FBgn0034786	CG13531	2.14778	6.2608e-65	0.977578	1.17456e-15	-
FBgn0027503	CG11970	1.57372	6.91874e-65	0.934605	1.23799e-25	-
FBgn0000524	dx	1.06389	7.34044e-65	0.793608	2.46335e-39	deltex
FBgn0260934	par-1	1.84704	8.43143e-65	1.63795	1.6126e-55	par-1
FBgn0015615	SMC3	1.38748	1.15367e-64	0.759948	6.11995e-22	Structural maintenance of chromosomes 3
FBgn0026722	drosha	1.45207	1.80779e-64	0.603169	4.1205e-13	drosha
FBgn0001986	Mtr4	1.47099	1.93275e-64	1.00877	2.54799e-33	Mtr4 helicase
FBgn0029893	CG14442	1.38175	2.05194e-64	0.624166	2.81481e-15	-
FBgn0032480	Edem2	1.80216	2.14964e-64	0.817301	2.05977e-15	ER degradation enhancer
FBgn0039187	CG6454	1.83881	3.09669e-64	0.95472	9.1818e-20	-
FBgn0026869	Tdg	2.1963	3.49874e-64	1.68869	1.16838e-41	Thymine DNA glycosylase
FBgn0086655	jing	2.5685	4.625e-64	1.44594	5.6485e-23	jing
FBgn0265901	asRNA:CR44690	2.49814	4.9083e-64	1.47366	3.75368e-25	antisense RNA:CR44690
FBgn0000307	chif	2.61691	8.05732e-64	1.54059	6.71318e-25	chiffon
FBgn0263667	Lpt	1.70806	8.7196e-64	0.956866	1.35607e-22	Lost PHDs of trr
FBgn0002878	mus101	1.70266	8.88685e-64	0.9575	8.76378e-23	mutagen-sensitive 101
FBgn0029881	pigs	2.77383	1.21259e-63	2.31878	1.79235e-48	pickled eggs
FBgn0032479	CG16974	2.72855	1.24472e-63	1.54083	5.90824e-23	-
FBgn0032475	Sfmbt	1.82739	1.59522e-63	1.19456	3.23297e-30	Scm-related gene containing four mbt domains
FBgn0263599	Brr2	2.39962	1.62629e-63	1.46374	1.67751e-26	Brr2 U5 snRNP complex subunit
FBgn0026679	IntS4	1.68604	1.88926e-63	1.07367	1.35368e-28	Integrator 4
FBgn0038721	subdued	1.77963	2.17352e-63	1.0633	2.9794e-25	subdued
FBgn0030017	CG2278	3.21156	2.53606e-63	1.06876	3.03665e-11	-
FBgn0266557	kis	2.94003	2.99282e-63	1.37296	5.28793e-16	kismet
FBgn0038344	obe	2.55929	3.1059e-63	1.21754	1.41292e-16	obelus
FBgn0263352	Unr	2.50902	3.5467e-63	1.27328	1.17545e-18	Upstream of N-ras
FBgn0023130	a6	1.31388	3.60142e-63	0.70147	3.44219e-20	a6
FBgn0036896	wnd	1.79284	3.79497e-63	1.02974	2.16022e-23	wallenda
FBgn0046704	Liprin-Œ±	2.22527	3.82136e-63	1.43393	3.09912e-29	Liprin-alpha
FBgn0261649	tinc	3.34331	4.01232e-63	1.50607	7.42709e-16	tincar
FBgn0003209	raw	1.51546	4.31704e-63	0.896531	1.11458e-24	raw
FBgn0259785	pzg	1.70744	5.0097e-63	1.22358	9.97433e-36	putzig
FBgn0003598	Su(var)3-7	1.57859	5.36259e-63	1.62649	3.40273e-72	Suppressor of variegation 3-7
FBgn0287775	18w	3.22237	5.87435e-63	1.43228	7.83668e-15	18 wheeler
FBgn0050421	Usp15-31	1.49494	6.95498e-63	0.960895	7.96743e-29	Ubiquitin specific protease 15/31
FBgn0016917	Stat92E	2.77933	8.44557e-63	2.366	9.35934e-50	Signal-transducer and activator of transcription protein at 92E
FBgn0262647	Nup160	1.74611	8.92326e-63	0.813664	8.16708e-16	Nucleoporin 160kD
FBgn0262109	lncRNA:CR42862	2.65047	8.95131e-63	1.08446	1.67454e-12	long non-coding RNA:CR42862
FBgn0085437	CG34408	2.2514	1.18372e-62	1.08678	7.1298e-17	-
FBgn0038860	Ice2	1.29799	1.2821e-62	0.690504	6.97132e-20	Interacts with the C terminus of ELL 2
FBgn0032587	CG5953	1.39668	1.51298e-62	0.846213	1.65936e-25	-
FBgn0261397	didum	1.73802	2.35414e-62	0.868065	7.11704e-18	dilute class unconventional myosin
FBgn0261563	wb	3.35008	2.97117e-62	1.33294	3.35151e-12	wing blister
FBgn0284408	trol	3.70871	3.10332e-62	1.07078	1.03686e-07	terribly reduced optic lobes
FBgn0032454	CG5787	1.31677	3.20449e-62	1.11344	4.14079e-48	-
FBgn0264901	lncRNA:CR44092	3.89648	3.47303e-62	1.92675	5.29777e-20	long non-coding RNA:CR44092
FBgn0033766	Nup188	2.21668	3.60108e-62	1.10864	7.01089e-18	Nucleoporin 188kDa
FBgn0004648	svr	2.61333	4.4674e-62	1.12134	1.76361e-13	silver
FBgn0261671	tweek	3.96813	5.39865e-62	1.86465	6.55347e-16	tweek
FBgn0037074	Tbc1d8-9	1.93062	5.70568e-62	1.39453	1.23982e-35	TBC1 domain family member 8/9
FBgn0023407	B4	2.57185	5.7419e-62	1.75568	4.59247e-32	B4
FBgn0028494	CG6424	1.22088	8.02958e-62	0.637445	3.9979e-19	-
FBgn0030293	CG1737	1.44845	1.67541e-61	0.901065	1.34839e-26	-
FBgn0033713	CG8841	1.15821	2.40619e-61	0.70762	1.88213e-25	-
FBgn0041582	tamo	2.07499	2.58022e-61	1.33205	3.6612e-28	tamo
FBgn0003268	rod	1.42713	6.14977e-61	0.713348	1.71075e-17	rough deal
FBgn0029504	CHES-1-like	2.10831	6.92029e-61	1.35933	3.25612e-28	Checkpoint suppressor 1-like
FBgn0262733	Src64B	1.78872	1.02584e-60	1.63036	6.98412e-55	Src oncogene at 64B
FBgn0000382	csw	1.94057	1.35504e-60	1.26688	9.20346e-29	corkscrew
FBgn0016797	fz2	2.27271	3.00695e-60	1.03845	9.00175e-15	frizzled 2
FBgn0038303	SIDL	1.47748	3.91932e-60	0.637971	3.58333e-13	Shal Interactor of Di-Leucine Motif
FBgn0035812	CG7457	1.6535	5.23604e-60	0.837314	1.1412e-17	-
FBgn0001139	gro	1.04729	6.90815e-60	0.717639	5.27376e-31	groucho
FBgn0026713	Prp16	1.99962	7.48165e-60	1.28964	9.86966e-28	pre-mRNA processing factor 16
FBgn0034606	ASPP	2.38793	8.18968e-60	1.27303	1.55826e-19	Ankyrin-repeat
FBgn0002891	PolZ1	2.25068	9.84055e-60	1.29792	1.87829e-22	DNA polymerase zeta subunit 1
FBgn0039680	Cap-D2	1.55757	1.01717e-59	0.860958	1.09795e-20	CAP-D2 condensin subunit
FBgn0000464	Lar	3.16395	1.07006e-59	1.65476	9.57566e-19	Leukocyte-antigen-related-like
FBgn0043458	CG12084	1.39669	1.13372e-59	0.938485	9.54055e-30	-
FBgn0038286	CG6966	1.66909	1.18639e-59	1.24291	2.26445e-36	-
FBgn0261610	CG42699	2.18402	1.24996e-59	0.858784	4.06285e-11	-
FBgn0039240	CG3744	1.86701	1.42856e-59	1.11929	4.48997e-24	-
FBgn0039862	kek6	2.6332	1.5739e-59	1.34743	3.33931e-18	kekkon 6
FBgn0085450	Snoo	2.18975	1.63584e-59	1.19787	2.96541e-20	Sno oncogene
FBgn0262617	Nuak	1.41427	2.03106e-59	0.604573	1.00042e-12	Nuak family kinase
FBgn0011692	pav	1.19023	2.99553e-59	0.885586	6.06181e-36	pavarotti
FBgn0267488	Mcr	2.56806	5.25502e-59	1.28789	4.183e-17	Macroglobulin complement-related
FBgn0036735	Edc3	1.6693	5.50599e-59	1.77096	1.91543e-71	Enhancer of decapping 3
FBgn0024248	chico	1.19652	1.03089e-58	1.0359	1.74261e-46	chico
FBgn0261444	CG3638	2.55557	1.16433e-58	1.47939	3.11317e-22	-
FBgn0024698	Cpsf160	1.7158	1.71514e-58	0.804394	5.78473e-15	Cleavage and polyadenylation specificity factor 160
FBgn0004649	yl	3.34045	1.81887e-58	1.71074	1.26251e-17	yolkless
FBgn0000119	arr	3.01296	1.82376e-58	1.35567	6.62008e-14	arrow
FBgn0004595	pros	3.27804	2.30928e-58	1.78905	4.05124e-20	prospero
FBgn0034742	CG4294	2.11045	2.43385e-58	1.12058	8.3385e-19	-
FBgn0261238	Alh	1.62839	2.63344e-58	0.970821	2.51555e-23	Alhambra
FBgn0013765	cnn	1.43803	2.97601e-58	0.835591	3.54638e-22	centrosomin
FBgn0000053	Gart	1.86089	3.48465e-58	1.0944	1.15869e-22	GART trifunctional enzyme
FBgn0011655	Med	0.998057	4.11643e-58	0.89916	2.50245e-49	Medea
FBgn0021776	mira	2.01072	4.99368e-58	1.14349	3.28383e-21	miranda
FBgn0250867	CG42238	2.62828	5.16532e-58	1.38743	1.2868e-18	-
FBgn0003292	rt	2.03006	5.41501e-58	1.30001	1.80848e-26	rotated abdomen
FBgn0002906	Blm	2.05806	5.65045e-58	1.14926	1.57331e-20	Bloom syndrome helicase
FBgn0039631	Sirt7	1.27303	1.09223e-57	0.825622	1.18807e-26	Sirtuin 7
FBgn0038475	Keap1	1.41031	1.2555e-57	0.596914	3.79896e-12	Keap1
FBgn0024187	syd	1.69248	1.29554e-57	0.724297	1.70863e-12	sunday driver
FBgn0263395	hppy	2.03989	1.36872e-57	0.912699	1.46639e-13	happyhour
FBgn0030869	Socs16D	1.79766	2.02642e-57	0.908735	6.82754e-17	Suppressor of Cytokine Signaling at 16D
FBgn0043900	pygo	1.55238	2.24561e-57	1.22192	6.56636e-39	pygopus
FBgn0005624	Psc	2.07888	2.51167e-57	1.23449	8.85659e-23	Posterior sex combs
FBgn0024291	Sirt1	1.64303	2.52506e-57	0.624033	4.83693e-10	Sirtuin 1
FBgn0019890	Smg5	1.28071	3.15614e-57	0.759096	1.79463e-22	Smg5 nonsense mediated mRNA decay factor
FBgn0033915	Snrk	1.41469	3.39038e-57	0.905157	4.25563e-26	SNF related kinase
FBgn0050295	Ipk1	1.2947	4.0617e-57	0.868338	1.46724e-27	Inositol phosphate kinase 1
FBgn0260639	Œ≥Tub23C	1.42688	4.08417e-57	1.15169	2.96439e-40	gamma-Tubulin at 23C
FBgn0038427	ema	1.34266	4.4899e-57	0.6685	2.94202e-16	endosomal maturation defective
FBgn0263108	BtbVII	1.24828	5.25643e-57	0.679459	3.26274e-19	BTB-protein-VII
FBgn0031696	Bub1	1.73768	5.32647e-57	1.4763	1.14282e-44	Bub1 kinase
FBgn0016930	Dyrk2	1.62035	5.56181e-57	0.961137	1.54233e-22	Dual-specificity tyrosine phosphorylation-regulated kinase 2
FBgn0261802	CG42748	1.59895	6.27752e-57	1.12836	3.10541e-31	-
FBgn0035802	Pura	2.18428	8.09727e-57	1.09985	1.27071e-16	Puratrophin-1-like
FBgn0034072	Dg	1.98092	1.02493e-56	1.13633	3.99224e-21	Dystroglycan
FBgn0019661	lncRNA:roX1	2.70293	1.08038e-56	1.68247	1.15299e-24	long non-coding RNA on the X 1
FBgn0032295	CG12299	1.55355	1.2504e-56	0.899078	2.08552e-21	-
FBgn0259984	kuz	2.84916	1.34561e-56	1.55591	2.83522e-19	kuzbanian
FBgn0266916	Cenp-C	1.49162	1.40037e-56	0.80592	7.78527e-19	Centromeric protein-C
FBgn0052227	gogo	2.68569	1.60403e-56	1.14722	1.53399e-13	golden goal
FBgn0266411	sima	2.65841	1.86105e-56	1.84895	2.54341e-30	similar
FBgn0051163	SKIP	2.8526	2.43421e-56	1.83355	4.785e-26	Shal K[+] channel interacting protein
FBgn0267002	unc-104	1.88855	2.54795e-56	0.983749	1.55832e-17	uncoordinated-104
FBgn0032934	CG8679	1.4445	2.65238e-56	0.724746	2.79118e-16	-
FBgn0040022	Set1	2.65156	3.04807e-56	1.78101	2.8969e-28	SET domain containing 1
FBgn0086686	l(3)L1231	1.38709	3.24731e-56	0.879668	2.8375e-25	lethal (3) L1231
FBgn0026620	tacc	2.01711	4.51003e-56	1.64373	7.98357e-41	transforming acidic coiled-coil protein
FBgn0265140	Meltrin	1.89414	4.7373e-56	0.932859	9.69957e-16	Meltrin
FBgn0030701	CG16952	1.87995	5.72729e-56	0.792902	7.40847e-12	-
FBgn0037573	CG7483	1.75751	5.88538e-56	2.46896	1.32672e-116	-
FBgn0030114	CG17754	1.18534	2.21844e-55	0.712115	3.78962e-22	-
FBgn0263747	CG43672	2.60417	2.37671e-55	1.20428	4.09366e-14	-
FBgn0020299	stumps	2.32002	2.94917e-55	1.53304	1.02207e-26	stumps
FBgn0031879	uif	3.73505	4.39991e-55	1.22206	1.27167e-07	uninflatable
FBgn0031836	CG11050	1.21638	5.75058e-55	0.684236	1.12027e-19	-
FBgn0288469	Pex23	2.33763	6.00425e-55	1.45766	5.42006e-24	Peroxin 23
FBgn0262867	Ptr	2.55402	8.54575e-55	1.38009	2.3254e-18	Patched-related
FBgn0264561	Glg1	2.11125	9.16965e-55	1.0058	1.71227e-14	Golgi complex-localized glycoprotein 1
FBgn0003053	peb	3.04344	2.02186e-54	1.41531	5.87315e-14	pebbled
FBgn0027948	msps	2.05191	2.21727e-54	1.04656	2.54264e-16	mini spindles
FBgn0086784	stmA	0.954044	3.01957e-54	0.721998	2.30044e-33	stambha A
FBgn0001169	H	2.27427	4.74557e-54	1.52218	5.35289e-27	Hairless
FBgn0004583	ex	2.69189	5.14321e-54	1.30636	5.77627e-15	expanded
FBgn0085434	NaCP60E	3.52734	5.25838e-54	1.43364	5.32776e-11	Na channel protein 60E
FBgn0000395	cv-2	2.74688	5.75363e-54	1.33705	1.84544e-15	crossveinless 2
FBgn0010926	l(3)07882	1.89221	5.8192e-54	2.30548	5.59619e-85	lethal (3) 07882
FBgn0038499	Brf	2.08275	7.33263e-54	1.67739	3.58705e-38	Brf RNA polymerase III subunit
FBgn0033984	Lap1	1.45676	1.01808e-53	0.76585	5.01505e-17	Lap1
FBgn0262517	Ltn1	1.24689	1.42968e-53	0.684181	2.36467e-18	Listerin E3 ubiquitin protein ligase 1
FBgn0259745	wech	2.15993	2.43132e-53	1.28514	2.40364e-21	wech
FBgn0014133	bif	1.60974	2.68268e-53	1.30082	3.46259e-38	bifocal
FBgn0037702	CG8176	1.14077	4.14294e-53	0.776833	2.74968e-27	-
FBgn0021761	Nup154	2.37978	4.57354e-53	1.1878	2.52178e-15	Nucleoporin 154kD
FBgn0000578	ena	1.42568	5.79329e-53	0.929299	4.67396e-25	enabled
FBgn0014141	cher	2.38207	5.94867e-53	1.35205	2.03767e-19	cheerio
FBgn0031016	kek5	2.4691	7.08214e-53	1.40989	1.28405e-19	kekkon 5
FBgn0038324	CG5038	2.43401	7.76729e-53	1.39102	1.13748e-19	-
FBgn0041150	hoe1	2.05665	1.23275e-52	1.18736	6.6032e-20	hoepel1
FBgn0287873	zip	2.10087	1.30919e-52	0.667074	7.86337e-07	zipper
FBgn0035959	CG4911	1.34039	1.96825e-52	0.99936	4.15118e-32	-
FBgn0030034	CG10555	1.39254	2.99296e-52	0.926567	1.13783e-25	-
FBgn0035267	CG13921	1.93259	3.10752e-52	1.076	1.8369e-18	-
FBgn0027568	Cand1	1.47061	3.4103e-52	1.03165	1.97631e-28	Cullin-associated and neddylation-dissociated 1
FBgn0259221	ATP8A	1.38022	4.42758e-52	0.795771	1.61392e-19	ATPase 8A
FBgn0260450	CalpC	1.30995	4.86906e-52	0.670718	1.38184e-15	Calpain C
FBgn0265082	Cdep	2.99743	5.67993e-52	1.31502	4.86001e-12	Chondrocyte-derived ezrin-like domain containing protein
FBgn0034491	Hsl	1.70281	5.79356e-52	1.0531	2.40835e-22	Hormone-sensitive lipase
FBgn0264959	Src42A	1.09602	5.94456e-52	0.807806	6.67961e-31	Src oncogene at 42A
FBgn0034964	IntS1	1.57546	7.40244e-52	0.784852	6.36831e-15	Integrator 1
FBgn0034878	pita	1.34105	9.29997e-52	0.97354	5.29769e-30	pita
FBgn0004406	PolG1	1.68901	1.18501e-51	0.741589	7.96736e-12	DNA polymerase gamma subunit 1
FBgn0260965	CG42588	3.14065	1.67277e-51	2.40085	3.40932e-33	-
FBgn0261934	dikar	2.91953	1.90325e-51	1.4682	4.23671e-15	dikar
FBgn0000008	a	1.80025	1.94221e-51	1.21975	2.9214e-26	arc
FBgn0037659	Kdm2	1.21254	2.20593e-51	0.765217	8.92578e-23	Lysine demethylase 2
FBgn0015803	RtGEF	1.49638	2.59293e-51	1.76701	1.86166e-75	Rho-type guanine nucleotide exchange factor
FBgn0041604	dlp	2.21896	2.64895e-51	1.13151	1.91817e-15	dally-like
FBgn0037213	CG12581	1.81423	3.14257e-51	1.20294	7.17544e-25	-
FBgn0037109	MED1	1.65021	3.52527e-51	0.863528	3.85446e-16	Mediator complex subunit 1
FBgn0039157	Myo95E	1.86066	4.30725e-51	0.82714	5.48833e-12	Myosin 95E
FBgn0020496	CtBP	1.74976	4.74506e-51	1.86731	8.4778e-63	C-terminal Binding Protein
FBgn0053111	CG33111	1.98207	5.08142e-51	0.89298	2.68536e-12	-
FBgn0001180	hb	1.75596	1.24883e-50	1.24484	3.12854e-28	hunchback
FBgn0259735	mtgo	1.51994	1.4663e-50	0.76756	6.32856e-15	miles to go
FBgn0051635	CG31635	1.91341	1.6959e-50	1.19712	3.07595e-22	-
FBgn0003308	ry	2.3682	2.14785e-50	1.00445	3.51555e-11	rosy
FBgn0022710	Ac13E	3.64665	2.19013e-50	1.27935	5.16435e-08	Adenylyl cyclase 13E
FBgn0024987	ssx	1.11807	2.22769e-50	1.03097	5.59854e-46	sister-of-Sex-lethal
FBgn0035207	Herc4	1.05281	2.41194e-50	0.633356	1.9371e-20	HECT and RLD domain containing E3 ubiquitin ligase 4
FBgn0039137	Epp	1.24478	3.11757e-50	0.948768	1.45613e-30	Ecdysteroid phosphate phosphatase
FBgn0032348	CG4751	1.66169	3.31758e-50	1.86836	3.74226e-67	-
FBgn0051793	CG31793	1.83323	4.39256e-50	0.962147	6.92302e-16	-
FBgn0039908	Asator	1.62966	4.91539e-50	1.19016	3.71595e-29	Asator
FBgn0035227	Iml1	1.62565	6.02825e-50	0.919232	3.84477e-18	Increased minichromosome loss 1
FBgn0086898	dgo	1.38165	6.23872e-50	0.968496	2.15353e-26	diego
FBgn0266111	ana3	1.73591	7.23327e-50	0.802769	1.42783e-12	anastral spindle 3
FBgn0266098	rg	4.03265	7.73633e-50	1.89905	2.24256e-16	rugose
FBgn0085443	spri	2.02383	1.00672e-49	1.11085	3.61572e-17	sprint
FBgn0037021	Pcif1	1.02935	1.16648e-49	0.716569	1.25295e-26	Phosphorylated CTD-interacting factor 1
FBgn0038488	m-cup	1.04886	1.25922e-49	0.702983	1.86888e-24	mann-cup
FBgn0015513	mbc	1.64677	1.35673e-49	0.911284	2.2292e-17	myoblast city
FBgn0026160	tna	2.80272	1.45296e-49	1.41817	7.40573e-15	tonalli
FBgn0036801	MYPT-75D	1.04534	1.49205e-49	0.6792	2.89755e-23	Myosin phosphatase targeting subunit 75D
FBgn0263993	CG43736	1.41953	1.6459e-49	0.96526	1.78829e-25	-
FBgn0038385	Fbxl7	3.09386	1.89943e-49	1.88039	6.18493e-21	F-box and leucine-rich repeat protein 7
FBgn0260012	pds5	1.16678	2.45806e-49	0.629026	1.97713e-16	precocious dissociation of sisters 5
FBgn0033265	coil	1.54075	2.71662e-49	1.74964	6.02976e-65	coilin
FBgn0003079	Raf	1.2308	3.84842e-49	0.780372	4.64361e-22	Raf oncogene
FBgn0052103	SCaMC	1.0972	4.93931e-49	0.690315	1.03556e-21	Short Calcium-binding Mitochondrial Carrier
FBgn0024250	brk	2.32137	5.37216e-49	2.05288	1.20254e-39	brinker
FBgn0013995	Calx	1.08165	5.78989e-49	0.628067	1.08003e-18	Na/Ca-exchange protein
FBgn0032752	CG10702	2.45641	6.00404e-49	1.53143	1.95941e-21	-
FBgn0031885	Mnn1	1.43697	6.38628e-49	0.667617	1.95804e-12	Menin 1
FBgn0050089	CG30089	2.41941	7.28768e-49	1.3748	3.64373e-18	-
FBgn0036294	CG10654	1.82666	7.70219e-49	1.29959	1.6971e-26	-
FBgn0015371	chn	1.13548	7.94426e-49	0.684348	4.95812e-20	charlatan
FBgn0045063	fdl	2.68999	8.40048e-49	1.34911	2.6508e-14	fused lobes
FBgn0259108	futsch	3.84027	8.55826e-49	1.13039	3.01091e-06	futsch
FBgn0027835	Dp1	1.53708	8.73696e-49	1.04321	4.54103e-25	Dodeca-satellite-binding protein 1
FBgn0031170	Abca3	2.43917	9.07429e-49	1.36158	2.08905e-17	ATP binding cassette subfamily A member 3
FBgn0028484	Ack	1.38328	9.68968e-49	0.872835	1.04224e-21	Activated Cdc42 kinase
FBgn0261260	mgl	3.73477	1.28987e-48	1.43513	5.41738e-09	Megalin
FBgn0039055	Rassf	1.41107	1.30169e-48	0.753391	6.3058e-16	Ras association family member
FBgn0261477	slim	1.37627	1.33002e-48	0.999886	3.16043e-28	scruin like at the midline
FBgn0031187	Usp2	1.47098	1.40765e-48	0.899095	2.02963e-20	Ubiquitin specific protease 2
FBgn0024555	flfl	1.9377	1.5021e-48	1.19207	9.63642e-21	falafel
FBgn0015949	hrg	1.5399	1.97345e-48	0.82324	6.59295e-16	hiiragi
FBgn0262562	CG43102	3.03935	2.02053e-48	1.52965	4.72801e-15	-
FBgn0003463	sog	2.95953	2.25482e-48	1.68631	4.10805e-18	short gastrulation
FBgn0263005	Chpf	1.54355	2.34433e-48	0.66871	7.42878e-11	Chondroitin polymerizing factor
FBgn0037949	prd1	1.71377	2.70415e-48	1.20721	1.60367e-26	pruning defect 1
FBgn0086384	Mer	1.19398	2.79176e-48	0.727359	4.77347e-20	Merlin
FBgn0035766	eco	1.70364	4.04546e-48	1.39734	1.84213e-35	Establishment of cohesion
FBgn0029830	Grip	1.50532	4.72837e-48	0.998585	1.52764e-22	Glutamate receptor interacting protein
FBgn0023511	Edem1	2.24826	6.60084e-48	1.0817	4.88876e-13	ER degradation enhancer
FBgn0039117	tst	1.06783	8.07773e-48	0.666488	1.24725e-20	twister
FBgn0011259	Sema1a	1.92343	9.02302e-48	0.883875	5.94211e-12	Semaphorin 1a
FBgn0053180	Ranbp16	1.19678	1.0026e-47	0.701325	1.73673e-18	Ranbp16
FBgn0035397	PAN3	1.30088	1.29555e-47	0.819566	3.11612e-21	Poly(A) specific ribonuclease subunit PAN3
FBgn0026597	Axn	1.56758	1.87102e-47	1.15101	2.9279e-28	Axin
FBgn0015360	oxt	2.02876	2.41979e-47	1.1448	3.09654e-17	peptide O-xylosyltransferase
FBgn0039451	CG6420	1.32012	2.45003e-47	0.836361	2.72342e-21	-
FBgn0025724	Œ≤'COP	1.34622	2.5331e-47	0.816846	1.23157e-19	Coat Protein (coatomer) beta'
FBgn0027279	l(1)G0196	1.762	3.75941e-47	0.724839	1.1064e-09	lethal (1) G0196
FBgn0019637	Atu	1.49103	3.77562e-47	1.59422	2.04155e-57	Another transcription unit
FBgn0000180	bib	2.38365	4.62752e-47	1.14311	8.26425e-13	big brain
FBgn0085432	pan	1.95268	5.10876e-47	1.12994	6.83804e-18	pangolin
FBgn0259818	CG42399	1.96044	5.11176e-47	0.972747	1.67861e-13	-
FBgn0083956	CG34120	2.82883	6.28879e-47	1.27866	1.62542e-11	-
FBgn0261988	Gprk2	1.48073	7.00377e-47	0.936458	5.13006e-21	G protein-coupled receptor kinase 2
FBgn0002945	nkd	2.28777	7.88061e-47	0.989909	1.35693e-10	naked cuticle
FBgn0039907	lgs	1.57289	8.36666e-47	1.46755	3.5038e-44	legless
FBgn0004885	tok	3.20538	1.28258e-46	1.77773	1.90925e-17	tolkin
FBgn0003391	shg	2.72732	1.32557e-46	1.60761	1.98006e-18	shotgun
FBgn0020370	TppII	1.85315	1.49584e-46	1.26838	2.4076e-24	Tripeptidyl-peptidase II
FBgn0278604	dmt	1.24949	1.69471e-46	0.95196	1.11329e-29	dalmatian
FBgn0031683	CG4230	1.10177	1.72575e-46	1.14504	6.24983e-50	-
FBgn0264962	Pcf11	1.48755	1.72575e-46	0.910773	1.11621e-19	Pcf11 cleavage and polyadenylation factor subunit
FBgn0001235	hth	2.23263	1.85862e-46	1.01133	2.30029e-11	homothorax
FBgn0040297	Nhe2	2.50955	1.99311e-46	1.53781	9.95465e-20	Na[+]/H[+] hydrogen exchanger 2
FBgn0263102	psq	1.32348	2.128e-46	0.672031	6.49879e-14	pipsqueak
FBgn0051989	Cap-D3	1.436	2.256e-46	0.616923	3.00757e-10	Chromosome associated protein D3
FBgn0262714	Sap130	1.41331	2.50802e-46	1.13319	1.41096e-32	Sin3A-associated protein 130
FBgn0004456	mew	2.95086	3.79796e-46	1.37368	2.62616e-12	multiple edematous wings
FBgn0037443	Dmtn	1.26307	4.01407e-46	1.09783	1.14077e-37	Dementin
FBgn0266053	Patr-1	2.30055	1.00496e-45	1.61453	4.36039e-25	Protein associated with topo II related - 1
FBgn0264975	Nrg	2.24816	1.06004e-45	1.47175	6.64937e-22	Neuroglian
FBgn0003326	sca	2.69923	1.06186e-45	1.36837	8.41817e-14	scabrous
FBgn0027951	MTA1-like	1.33689	1.22942e-45	0.989316	1.34403e-27	Metastasis associated 1-like
FBgn0083940	RhoU	2.08924	1.35193e-45	1.63494	2.62697e-30	RhoU
FBgn0034258	eIF3c	1.37548	1.38252e-45	0.926962	3.80142e-23	eukaryotic translation initiation factor 3 subunit c
FBgn0028579	phtf	1.50588	1.40023e-45	1.1596	1.45287e-29	phtf
FBgn0020236	ATPCL	1.27107	1.72073e-45	0.799925	3.00139e-20	ATP citrate lyase
FBgn0051457	CG31457	2.19437	1.74651e-45	2.28349	1.61986e-52	-
FBgn0041210	HDAC4	1.22116	1.94981e-45	0.944606	7.9714e-30	Histone deacetylase 4
FBgn0005642	wdn	1.14964	2.13695e-45	0.881531	2.84482e-29	wings down
FBgn0040388	boi	1.52509	2.17152e-45	0.621259	3.51658e-09	brother of ihog
FBgn0037814	CG6325	1.12891	2.28781e-45	0.636838	2.01837e-16	-
FBgn0024510	dlt	1.44907	2.9726e-45	0.78375	3.54098e-15	discs lost
FBgn0259791	bora	2.2618	2.9726e-45	2.40423	5.98801e-55	aurora borealis
FBgn0026262	Taf3	1.9342	3.14445e-45	0.927164	3.0046e-12	TBP-associated factor 3
FBgn0051849	Mgat3	1.9706	4.93375e-45	0.936376	5.08869e-12	beta-1
FBgn0039431	plum	2.26623	5.07452e-45	1.12753	3.91065e-13	plum
FBgn0037445	CG9727	1.77131	5.46406e-45	1.00695	1.25363e-16	-
FBgn0004108	Nrt	2.04332	6.70929e-45	1.04267	1.26499e-13	Neurotactin
FBgn0002643	mam	2.60062	6.76382e-45	1.7655	3.8716e-23	mastermind
FBgn0051729	CG31729	2.31363	7.04352e-45	1.23437	8.85655e-15	-
FBgn0034071	CG8405	1.35991	7.35287e-45	0.839162	3.29367e-19	-
FBgn0263974	qin	1.83955	7.5741e-45	1.25768	2.43521e-23	qin
FBgn0024947	NTPase	1.4984	1.18074e-44	1.03614	1.22367e-23	NTPase
FBgn0027579	mino	1.73762	1.20479e-44	0.918339	1.94142e-14	minotaur
FBgn0263855	BubR1	1.89871	1.21043e-44	1.36557	1.22318e-25	Bub1-related kinase
FBgn0266084	Fhos	3.20384	1.21068e-44	1.56673	1.44972e-12	Formin homology 2 domain containing
FBgn0027521	CG3679	3.03494	1.27476e-44	3.70763	1.8115e-71	-
FBgn0002543	robo2	3.06887	1.55313e-44	1.43214	1.33459e-11	roundabout 2
FBgn0031384	CG4238	1.05444	1.94942e-44	0.667101	7.23656e-20	-
FBgn0032018	CG7806	2.05755	2.08984e-44	1.25845	8.09706e-19	-
FBgn0001077	ftz	2.71012	2.32459e-44	1.98979	4.74568e-26	fushi tarazu
FBgn0027596	Kank	2.21645	2.43031e-44	1.34061	2.16023e-18	Kank
FBgn0030344	Nrd1	2.2859	2.43137e-44	0.920711	7.6874e-09	Nardilysin
FBgn0003301	rut	3.29064	4.58799e-44	1.63912	6.90177e-13	rutabaga
FBgn0037188	CG7369	1.33126	4.76122e-44	0.70349	3.36419e-14	-
FBgn0013343	Syx1A	1.38959	5.93789e-44	0.96762	2.01166e-23	Syntaxin 1A
FBgn0259171	Pde9	2.7296	5.93789e-44	1.17282	4.53292e-10	Phosphodiesterase 9
FBgn0023512	eIF2BŒµ	1.00966	6.15271e-44	0.699772	5.86216e-23	eukaryotic translation initiation factor 2B subunit epsilon
FBgn0035983	CG4080	1.97765	6.41649e-44	1.24815	1.1248e-19	-
FBgn0037963	Cad87A	2.79641	7.19258e-44	1.73197	4.58102e-19	Cadherin 87A
FBgn0039863	CG1815	1.9971	7.35689e-44	1.30822	3.93381e-21	-
FBgn0052676	stx	0.969794	9.07348e-44	0.668638	4.03986e-23	stuxnet
FBgn0030246	CG1582	1.29574	9.68191e-44	0.648048	9.36095e-13	-
FBgn0034976	CG4049	1.54031	9.7688e-44	0.850765	2.45263e-15	-
FBgn0086442	mib2	1.55917	1.42052e-43	0.771974	1.57983e-12	mind bomb 2
FBgn0039213	atl	1.10542	1.62194e-43	0.688076	8.15355e-19	atlastin
FBgn0036386	CG8833	1.39582	2.75236e-43	1.05967	2.62373e-27	-
FBgn0016756	Usp47	2.31611	2.93814e-43	1.48111	5.90297e-20	Ubiquitin specific protease 47
FBgn0021764	sdk	3.30283	3.21922e-43	1.79953	7.89888e-15	sidekick
FBgn0267041	asRNA:CR45485	2.96135	4.21505e-43	2.44979	7.72969e-31	antisense RNA:CR45485
FBgn0027594	drpr	1.48293	4.29504e-43	0.775138	1.1813e-13	draper
FBgn0034098	krimp	1.28455	7.29607e-43	0.606049	2.65774e-11	krimper
FBgn0262730	dtn	2.30062	9.10673e-43	0.996656	1.03348e-09	detonator
FBgn0035879	GAPcenA	1.22172	9.2441e-43	1.04293	1.17069e-33	GTPase activating protein and centrosome-associated
FBgn0037770	Art4	0.936227	1.02746e-42	0.611934	2.42302e-20	Arginine methyltransferase 4
FBgn0026616	Œ±-Man-IIb	2.64532	1.23998e-42	1.56415	5.15166e-17	alpha-Mannosidase class II b
FBgn0286809	xmas	2.58177	1.31901e-42	0.99744	4.01882e-08	xmas
FBgn0051915	CG31915	1.70704	1.91812e-42	0.952805	4.16552e-15	-
FBgn0001404	egh	1.27752	2.6045e-42	0.61682	1.25979e-11	egghead
FBgn0027535	botv	3.00382	2.61382e-42	1.78246	4.96866e-17	brother of tout-velu
FBgn0028476	Usp1	1.85891	3.4602e-42	1.04801	2.07198e-15	Ubiquitin specific protease 1
FBgn0031070	CG12702	1.45864	4.18996e-42	0.856725	1.65763e-16	-
FBgn0264817	pre-lola-G	2.70154	4.39491e-42	0.860369	4.79131e-06	pre-lola-G
FBgn0010434	cora	2.37519	4.52148e-42	1.23296	2.41241e-13	coracle
FBgn0039286	dan	1.54973	5.00018e-42	1.6397	7.98274e-48	distal antenna
FBgn0259211	grh	2.45141	5.6288e-42	1.26132	4.76582e-13	grainy head
FBgn0017558	Pdk	1.41499	5.78691e-42	1.02956	1.68953e-24	Pyruvate dehydrogenase kinase
FBgn0037234	CG9795	1.20255	5.80052e-42	1.01945	1.14863e-32	-
FBgn0025702	Srpk79D	2.9786	5.8771e-42	1.52063	2.69311e-13	Serine-arginine protein kinase at 79D
FBgn0040230	dbo	1.04791	6.16542e-42	0.618376	1.54848e-16	diablo
FBgn0022153	l(2)k05819	0.965929	1.27551e-41	0.695007	1.04029e-23	lethal (2) k05819
FBgn0261984	Ire1	2.05051	1.4376e-41	1.12466	1.88665e-14	Inositol-requiring enzyme-1
FBgn0033233	Kdm4A	1.12879	1.47802e-41	0.844646	2.12187e-25	Lysine demethylase 4A
FBgn0005640	Eip63E	0.914206	1.58556e-41	0.621073	4.26433e-21	Ecdysone-induced protein 63E
FBgn0031738	CG9171	1.3068	1.6796e-41	0.716908	2.40843e-14	-
FBgn0000482	dor	1.23943	1.79525e-41	0.742785	1.11905e-16	deep orange
FBgn0023509	mip130	1.3479	1.8166e-41	0.691687	1.02368e-12	Myb-interacting protein 130
FBgn0020497	emb	1.43847	2.24802e-41	1.05204	1.45313e-24	embargoed
FBgn0261574	kug	3.40644	2.25622e-41	1.68545	6.04797e-12	kugelei
FBgn0003015	osk	1.52841	2.2639e-41	0.885717	6.43492e-16	oskar
FBgn0284435	tyn	2.81086	2.29467e-41	1.18248	3.88352e-09	trynity
FBgn0037142	CG14562	1.94972	2.47506e-41	1.25856	2.03767e-19	-
FBgn0264693	ens	0.925416	2.62599e-41	0.602013	1.42675e-19	ensconsin
FBgn0027506	EDTP	1.61301	3.33945e-41	0.669413	1.07761e-08	Egg-derived tyrosine phosphatase
FBgn0259174	Nedd4	1.69417	3.36453e-41	1.00654	1.35561e-16	Nedd4
FBgn0040080	pins	1.03984	3.99537e-41	0.802494	7.64322e-27	partner of inscuteable
FBgn0030240	CG2202	1.36932	4.37516e-41	0.947231	7.48687e-22	-
FBgn0267487	Ptp61F	1.05105	4.72456e-41	1.22711	1.53037e-59	Protein tyrosine phosphatase 61F
FBgn0085245	CG34216	3.09875	6.49788e-41	1.90452	9.28379e-18	-
FBgn0030091	CG7065	0.881288	9.49281e-41	0.659509	2.90746e-24	-
FBgn0051721	Trim9	2.17519	1.08924e-40	1.09341	3.52932e-12	Tripartite motif containing 9
FBgn0262127	kibra	3.30075	1.28176e-40	0.932538	0.00014466	kibra
FBgn0039644	rdog	1.35147	1.35443e-40	0.804459	2.02096e-16	red dog mine
FBgn0001624	dlg1	1.51138	1.37053e-40	1.34505	7.50529e-35	discs large 1
FBgn0261553	CG42671	0.90333	2.32142e-40	0.797003	1.95867e-33	-
FBgn0038827	Fancd2	1.06635	2.5554e-40	0.717865	2.50062e-20	Fancd2
FBgn0259927	CG42450	2.58679	2.83316e-40	1.44162	1.30803e-14	-
FBgn0010762	simj	1.26948	3.33439e-40	0.786231	1.86834e-17	simjang
FBgn0002926	ndl	3.42151	3.52843e-40	1.21721	2.22032e-07	nudel
FBgn0004611	Plc21C	2.00311	3.67112e-40	1.14583	4.22022e-15	Phospholipase C at 21C
FBgn0027505	Rab3-GAP	1.42406	4.20071e-40	0.902133	4.52306e-18	Rab3 GTPase activating protein
FBgn0038597	CG8064	0.961014	4.37651e-40	0.686088	8.29374e-22	-
FBgn0031399	mio	1.27996	4.70941e-40	0.590966	4.2109e-10	missing oocyte
FBgn0086613	Ino80	1.46298	7.17532e-40	1.13842	1.82401e-26	INO80 complex subunit
FBgn0039559	NSD	1.52127	7.39552e-40	1.21298	6.60785e-28	Nuclear receptor binding SET domain protein
FBgn0026060	Mipp2	1.80201	8.16141e-40	0.838623	2.66895e-10	Multiple inositol polyphosphate phosphatase 2
FBgn0262509	nrm	2.92943	9.20322e-40	1.26517	2.80308e-09	neuromusculin
FBgn0029728	CG2861	2.949	1.22222e-39	1.41782	1.65756e-10	-
FBgn0265991	Zasp52	3.19117	1.26983e-39	1.7017	7.31314e-14	Z band alternatively spliced PDZ-motif protein 52
FBgn0261862	whd	1.72888	1.51999e-39	0.8311	7.35094e-11	withered
FBgn0286070	cnk	1.49107	1.7234e-39	0.818596	8.95805e-14	connector enhancer of ksr
FBgn0034498	CG16868	3.13195	1.76817e-39	1.9022	1.244e-16	-
FBgn0003963	ush	2.80105	2.02475e-39	1.80947	1.30979e-18	u-shaped
FBgn0260962	pic	1.14619	2.46917e-39	1.00224	9.65519e-33	piccolo
FBgn0028499	CG7985	1.47234	2.67429e-39	0.996235	1.14859e-19	-
FBgn0001078	ftz-f1	1.72674	2.82033e-39	0.929832	3.07075e-13	ftz transcription factor 1
FBgn0013813	Dhc98D	3.2114	3.07074e-39	1.61628	6.25055e-12	Dynein heavy chain at 89D
FBgn0011817	nmo	1.34455	3.261e-39	0.943429	1.7071e-21	nemo
FBgn0031098	CG17068	1.17817	4.21089e-39	0.800771	5.8345e-20	-
FBgn0039883	RhoGAP100F	3.54	5.85298e-39	1.64419	1.2257e-10	Rho GTPase activating protein at 100F
FBgn0039004	Nup133	1.88715	8.0004e-39	1.3727	7.7218e-23	Nucleoporin 133kD
FBgn0265045	Strn-Mlck	3.70925	8.00938e-39	0.956875	0.000446457	Stretchin-Mlck
FBgn0037926	Elp1	1.24961	8.20515e-39	0.588431	3.07446e-10	Elongator complex protein 1
FBgn0033354	FANCI	1.68164	1.09959e-38	0.83692	2.65124e-11	Fanconi anemia complementation group I
FBgn0030600	hiw	3.81881	1.15451e-38	1.43186	3.68003e-07	highwire
FBgn0031174	CG1486	1.05516	2.8826e-38	0.724493	6.16961e-20	-
FBgn0035833	CG7565	1.41775	2.90234e-38	0.697337	6.8892e-11	-
FBgn0003278	Polr1B	1.47013	2.94374e-38	0.646508	5.7635e-09	RNA polymerase I subunit B
FBgn0016031	lama	1.09394	3.23183e-38	0.722129	1.35882e-18	lamina ancestor
FBgn0266917	Sf3a1	0.978481	3.88785e-38	1.16133	9.26064e-56	Splicing factor 3a subunit 1
FBgn0033738	DUBAI	1.66523	4.19058e-38	0.892027	9.7676e-13	Deubiquitinating apoptotic inhibitor
FBgn0039207	Cftr	2.03511	4.68946e-38	1.21332	1.74825e-15	CF transmembrane conductance regulator
FBgn0033376	CG8777	1.51405	5.26576e-38	0.731494	1.65756e-10	-
FBgn0010194	Wnt5	2.31853	5.93319e-38	1.33517	1.70318e-14	Wnt oncogene analog 5
FBgn0034720	Liprin-Œ≥	2.25483	5.97965e-38	1.16418	4.38371e-12	Liprin-gamma
FBgn0034246	Dcr-2	2.49701	7.12868e-38	1.81601	2.55669e-22	Dicer-2
FBgn0031799	Pez	1.82588	7.40124e-38	1.18587	5.07045e-18	Pez
FBgn0261963	mid	2.0815	7.997e-38	1.29128	5.66606e-16	midline
FBgn0032339	Wdr59	1.16903	8.00163e-38	0.590687	2.61291e-11	WD repeat domain 59
FBgn0004369	Ptp99A	1.69177	9.18687e-38	1.04609	2.22498e-16	Protein tyrosine phosphatase 99A
FBgn0030660	CG8097	1.39884	1.86446e-37	1.32602	5.54879e-36	-
FBgn0030930	Pgant7	1.68775	3.51738e-37	1.29388	4.16066e-24	Polypeptide N-Acetylgalactosaminyltransferase 7
FBgn0039543	CROT	0.841907	3.59688e-37	0.635145	8.3211e-23	Carnitine O-octanoyltransferase
FBgn0004607	zfh2	3.30488	3.60325e-37	1.32067	1.70497e-07	Zn finger homeodomain 2
FBgn0041184	Socs36E	2.02035	4.76352e-37	1.00897	5.93059e-11	Suppressor of cytokine signaling at 36E
FBgn0050147	Hil	1.2832	5.93023e-37	0.751115	8.35093e-14	Hillarin
FBgn0003866	tsh	1.91016	6.68196e-37	1.23008	4.1083e-17	teashirt
FBgn0029123	SoxN	2.01227	7.12909e-37	1.37816	3.98176e-19	SoxNeuro
FBgn0034113	CG8060	1.17632	7.67863e-37	0.836264	2.40999e-20	-
FBgn0017581	Lk6	1.30367	1.02427e-36	0.620459	5.81864e-10	Lk6 kinase
FBgn0023001	melt	2.31265	1.32528e-36	1.3291	6.41701e-14	melted
FBgn0033062	Ars2	1.08399	1.76349e-36	0.770844	1.50096e-20	Arsenic resistance protein 2
FBgn0031878	sip2	2.00426	1.94992e-36	2.18428	2.08105e-46	septin interacting protein 2
FBgn0033652	ths	2.3184	2.33687e-36	0.976624	3.96997e-08	thisbe
FBgn0283521	lola	0.775431	3.33455e-36	0.687294	5.04709e-31	longitudinals lacking
FBgn0011481	Ssdp	1.07952	4.51175e-36	0.612092	2.18501e-13	Sequence-specific single-stranded DNA-binding protein
FBgn0039623	CG1951	2.39394	4.51727e-36	1.34595	3.16154e-13	-
FBgn0002783	mor	1.12766	7.49638e-36	0.763679	1.79802e-18	moira
FBgn0039663	CG2321	1.60473	8.62222e-36	0.639125	3.82646e-07	-
FBgn0031474	CG2991	1.75842	8.84782e-36	0.90707	3.19107e-11	-
FBgn0026427	Su(var)2-HP2	3.82287	1.08143e-35	2.64971	2.90868e-19	Su(var)2-HP2
FBgn0036186	CG6071	2.6776	1.26262e-35	1.13638	2.16867e-08	-
FBgn0010452	trn	2.22229	1.39295e-35	1.16072	1.90355e-11	tartan
FBgn0035850	Atg18a	1.17873	1.46686e-35	0.798977	3.58758e-18	Autophagy-related 18a
FBgn0040208	Kat60	0.72681	1.60619e-35	0.650684	2.58128e-30	Katanin 60
FBgn0027621	Pfrx	1.60751	1.91925e-35	0.780756	6.08138e-10	6-phosphofructo-2-kinase
FBgn0036566	ClC-c	1.22311	2.83179e-35	0.620765	9.86697e-11	Chloride channel-c
FBgn0032123	Oatp30B	1.87981	2.87442e-35	1.06062	5.04887e-13	Organic anion transporting polypeptide 30B
FBgn0261283	SREBP	1.40388	3.20383e-35	0.744782	1.27631e-11	Sterol regulatory element binding protein
FBgn0035262	CG18171	2.97128	4.15235e-35	1.18109	4.24289e-08	-
FBgn0032079	CG31886	1.94335	4.32856e-35	1.06563	2.68433e-12	-
FBgn0011737	Wee1	1.10747	5.21488e-35	1.09251	3.04089e-36	Wee1 kinase
FBgn0021760	chb	1.62128	5.48939e-35	1.22699	3.1303e-22	chromosome bows
FBgn0000547	ed	2.89883	5.5333e-35	1.68846	1.0497e-13	echinoid
FBgn0037339	Pi4KIIŒ±	1.48218	5.92833e-35	0.601285	3.27493e-07	Phosphatidylinositol 4-kinase II alpha
FBgn0263772	CG43689	2.00246	5.94404e-35	0.979221	5.27194e-10	-
FBgn0052666	Drak	1.3788	6.6892e-35	0.989751	4.83645e-20	Death-associated protein kinase related
FBgn0031456	Tnpo-SR	1.19162	8.32924e-35	0.695641	1.49658e-13	Transportin-Serine/Arginine rich
FBgn0284221	Sema5c	2.04827	9.3588e-35	1.635	6.64405e-24	Semaphorin 5c
FBgn0015509	Cul1	1.11789	1.24158e-34	1.04347	9.23479e-33	Cullin 1
FBgn0030946	CG6659	1.95124	1.32051e-34	1.19101	9.78855e-15	-
FBgn0037565	CG9626	2.95966	1.52155e-34	1.92428	8.41217e-17	-
FBgn0029912	CG4557	1.46511	2.3694e-34	0.769899	3.92016e-11	-
FBgn0085423	GramD1B	1.37593	2.54299e-34	0.809647	1.18617e-13	GRAM domain containing 1B
FBgn0033169	CG11123	0.791506	2.61824e-34	0.870785	1.82743e-40	-
FBgn0038244	CG7987	0.9538	3.22449e-34	0.603568	1.58222e-15	-
FBgn0000228	Nin	0.955082	3.45537e-34	0.589674	7.57186e-15	Ninein
FBgn0035954	Doc3	2.38348	3.45958e-34	1.68564	1.07366e-18	Dorsocross3
FBgn0027794	Lrpprc2	1.32499	3.85303e-34	0.765599	5.0082e-13	Leucine-rich pentatricopeptide repeat containing 2
FBgn0011723	byn	1.62043	3.86206e-34	1.28237	1.1364e-20	brachyenteron
FBgn0003984	vn	2.20836	4.07063e-34	1.04656	2.48898e-09	vein
FBgn0036842	Ugt316A1	1.29177	4.13199e-34	0.605937	4.68977e-09	UDP-glycosyltransferase family 316 member A1
FBgn0259823	CG42404	2.92757	4.18918e-34	1.22699	5.60805e-08	-
FBgn0261787	brun	2.05756	4.33641e-34	0.905468	4.04909e-08	brunelleschi
FBgn0046253	CG3502	2.05455	4.40281e-34	0.808375	8.55273e-07	-
FBgn0000719	fog	1.74401	4.89626e-34	1.18801	9.04314e-18	folded gastrulation
FBgn0262975	cnc	1.19771	5.03777e-34	0.87913	2.04418e-20	cap-n-collar
FBgn0002673	twe	2.02032	7.35629e-34	1.99289	1.24691e-35	twine
FBgn0029874	CG3342	1.3559	7.39124e-34	1.59495	4.8462e-48	-
FBgn0286204	ich	2.21178	9.10245e-34	1.53239	1.34854e-17	ichor
FBgn0085400	side-V	3.21786	1.02656e-33	1.30158	2.45872e-07	sidestep V
FBgn0004509	Fur1	1.54216	1.29062e-33	1.11674	1.25811e-19	Furin 1
FBgn0267037	asRNA:CR45481	2.24703	1.43786e-33	0.927829	2.54948e-07	antisense RNA:CR45481
FBgn0052685	ZAP3	1.55255	1.57371e-33	1.00805	5.04797e-16	ZAP3
FBgn0026207	mbo	0.965767	1.59544e-33	1.03223	4.34362e-40	members only
FBgn0015558	tty	1.87092	1.75487e-33	0.970066	1.23806e-10	tweety
FBgn0034073	CG8414	2.01961	1.77379e-33	1.21702	5.76546e-14	-
FBgn0031540	Pif1	1.46949	1.98809e-33	0.91058	1.20388e-14	Pif1 DNA helicase
FBgn0053207	pxb	2.46397	2.98261e-33	1.23523	4.47142e-10	pxb
FBgn0085478	Zdhhc8	1.52018	3.74789e-33	0.795218	1.04449e-10	Zinc finger DHHC-type containing 8
FBgn0024991	CG2694	0.75459	4.80324e-33	0.628188	9.02493e-25	-
FBgn0025373	Fpps	1.19766	5.03013e-33	1.86445	9.33357e-81	Farnesyl pyrophosphate synthase
FBgn0004359	T48	1.02801	5.22567e-33	0.609928	3.68898e-13	Transcript 48
FBgn0037530	EMC1	2.01357	5.35945e-33	1.07362	4.76542e-11	ER membrane protein complex subunit 1
FBgn0015664	Dref	1.02338	5.46784e-33	0.91753	1.30921e-28	DNA replication-related element factor
FBgn0031872	ihog	2.3363	5.89949e-33	1.124	3.32672e-09	interference hedgehog
FBgn0033564	Pex6	1.42839	6.42201e-33	0.615561	1.49688e-07	Peroxin 6
FBgn0051992	gw	1.14509	6.58634e-33	0.892662	3.84255e-22	gawky
FBgn0263782	Hmgcr	1.49524	7.09166e-33	0.94771	5.29122e-15	HMG Coenzyme A reductase
FBgn0036449	bmm	1.10944	7.83718e-33	0.869082	4.86712e-22	brummer
FBgn0033657	Sln	3.20244	8.2199e-33	1.11896	3.11485e-06	Silnoon
FBgn0005616	msl-2	2.04228	8.87616e-33	1.61583	2.46481e-22	male-specific lethal 2
FBgn0085734	CR40450	3.45287	9.34543e-33	2.7446	2.87196e-22	-
FBgn0040234	c12.2	1.26286	1.00634e-32	0.716159	3.71145e-12	c12.2
FBgn0011747	Ank	1.55199	1.20657e-32	1.31829	7.9349e-26	Ankyrin
FBgn0268063	ltl	3.13464	1.23817e-32	1.6423	4.92492e-11	larval translucida
FBgn0267348	LanB2	3.77888	1.34586e-32	1.73778	1.27563e-08	Laminin B2
FBgn0029939	CG9650	2.78492	1.52152e-32	1.28239	1.915e-08	-
FBgn0260642	Antp	2.05315	1.60356e-32	0.985012	4.49713e-09	Antennapedia
FBgn0033859	fand	1.21813	1.67551e-32	0.9045	9.20235e-20	fandango
FBgn0035771	Sec63	1.6388	2.23874e-32	0.867342	1.06442e-10	Secretory 63
FBgn0023416	Ac3	2.54098	2.61823e-32	1.16807	1.2959e-08	Adenylate cyclase 3
FBgn0030330	Tango10	1.27723	3.04589e-32	0.825223	3.005e-15	Transport and Golgi organization 10
FBgn0011740	Œ±-Man-IIa	2.55094	3.31782e-32	1.60624	1.35624e-14	alpha-Mannosidase class II a
FBgn0002899	mus301	0.821422	3.8327e-32	0.867656	9.22144e-38	mutagen-sensitive 301
FBgn0284084	wg	2.3282	4.04908e-32	1.20311	2.82874e-10	wingless
FBgn0261016	clos	1.12475	4.11202e-32	0.780867	2.1747e-17	closca
FBgn0029088	disp	2.30137	4.33324e-32	1.52754	5.22058e-16	dispatched
FBgn0261800	LanB1	3.26622	4.49111e-32	1.77449	2.92952e-11	LanB1
FBgn0020257	Ppa	2.35902	4.56697e-32	1.02289	1.66076e-07	Partner of paired
FBgn0002121	l(2)gl	1.36718	6.0045e-32	0.746167	3.58529e-11	lethal (2) giant larvae
FBgn0039688	Kul	2.95729	6.85908e-32	1.76456	2.26463e-13	Kuzbanian-like
FBgn0051510	CG31510	1.48253	7.23665e-32	1.11044	7.90766e-20	-
FBgn0029873	CG3918	2.37665	9.5845e-32	2.20733	1.06578e-29	-
FBgn0015773	NetA	2.99748	1.03379e-31	1.61792	3.43961e-11	Netrin-A
FBgn0263593	Lpin	0.973813	1.11492e-31	0.596797	1.7857e-13	Lipin
FBgn0036494	Toll-6	3.04646	1.19365e-31	1.32942	1.47962e-07	Toll-6
FBgn0026598	Apc2	1.54414	1.1953e-31	1.40913	1.30921e-28	Adenomatous polyposis coli 2
FBgn0003719	tld	2.11412	1.77357e-31	0.733479	3.63953e-05	tolloid
FBgn0030685	Graf	1.45604	2.00327e-31	0.838614	4.19889e-12	GTPase regulator associated with FAK
FBgn0036483	CG12316	1.01366	2.36354e-31	0.663998	3.24101e-15	-
FBgn0014075	Uggt	2.31724	2.47018e-31	1.0556	5.48648e-08	UDP-glucose-glycoprotein glucosyltransferase
FBgn0038934	Gld2	2.97504	2.81925e-31	1.1525	9.87476e-07	GLD2 poly(A) polymerase
FBgn0033802	CG17724	2.51885	3.25339e-31	1.06191	5.10948e-07	-
FBgn0027616	Ythdc1	0.809306	3.7171e-31	0.691178	2.11374e-24	YTH domain containing 1
FBgn0010225	Gel	2.54673	4.68411e-31	1.34567	1.99403e-10	Gelsolin
FBgn0003002	opa	2.06162	7.06679e-31	1.50073	4.6307e-18	odd paired
FBgn0015799	Rbf	0.981099	7.07328e-31	0.73909	1.8905e-19	Retinoblastoma-family protein
FBgn0013272	Gp150	2.66127	7.7897e-31	1.70678	1.79047e-14	Gp150
FBgn0030716	CG9170	2.10106	8.78268e-31	1.01338	1.07091e-08	-
FBgn0001105	GŒ≤13F	0.998127	8.9305e-31	1.01076	6.42766e-34	G protein beta-subunit 13F
FBgn0266681	asRNA:CR45171	2.29298	9.24406e-31	1.01963	1.15095e-07	antisense RNA:CR45171
FBgn0040011	Slmap	2.2881	1.05854e-30	2.23965	7.24151e-32	Sarcolemma associated protein
FBgn0264307	orb2	1.17213	1.1208e-30	0.916203	2.4971e-20	orb2
FBgn0037894	Ipo9	0.804919	1.34464e-30	0.823191	4.74624e-34	Importin 9
FBgn0025574	Pli	1.02512	1.38285e-30	0.718069	8.99537e-17	Pellino
FBgn0000463	Dl	2.55821	1.71449e-30	1.78763	8.99029e-17	Delta
FBgn0086698	frtz	0.902515	1.86803e-30	0.62151	7.87599e-16	fritz
FBgn0259677	CG42346	2.56132	1.991e-30	1.34887	3.62174e-10	-
FBgn0051365	CG31365	0.877094	2.01998e-30	0.717452	4.12708e-22	-
FBgn0023441	fus	1.17451	2.44841e-30	0.742724	8.01598e-14	fusilli
FBgn0015774	NetB	3.1595	4.07198e-30	1.59419	1.49986e-09	Netrin-B
FBgn0033698	CG8858	1.15588	4.20532e-30	0.628917	1.79442e-10	-
FBgn0003896	tup	2.1223	5.29318e-30	1.21736	1.92076e-11	tailup
FBgn0013997	Nrx-IV	1.44779	5.31437e-30	0.878603	1.03217e-12	Neurexin IV
FBgn0053526	PNUTS	1.24519	5.31535e-30	0.673069	2.46143e-10	Phosphatase 1 nuclear targeting subunit
FBgn0038247	Cad88C	3.13567	6.66492e-30	1.44645	1.16344e-08	Cadherin 88C
FBgn0000490	dpp	2.06544	9.57493e-30	0.956083	6.92775e-08	decapentaplegic
FBgn0033901	O-fut1	2.44894	1.56008e-29	1.95365	1.01854e-20	O-fucosyltransferase 1
FBgn0261930	vnd	2.10801	1.65441e-29	0.912798	3.97849e-07	ventral nervous system defective
FBgn0036448	mop	1.3619	1.8772e-29	0.610703	2.39449e-07	myopic
FBgn0002973	numb	1.32093	2.08757e-29	1.11379	6.69679e-23	numb
FBgn0026393	Or43b	1.37484	2.89937e-29	0.876738	5.85547e-13	Odorant receptor 43b
FBgn0262117	IntS3	1.43186	2.91517e-29	1.08654	9.7346e-19	Integrator 3
FBgn0263929	jvl	1.73048	2.91612e-29	1.0887	2.73055e-13	javelin-like
FBgn0035086	CG12851	2.86823	3.19699e-29	1.68777	1.86096e-12	-
FBgn0259824	Hip14	1.59256	3.27842e-29	0.963113	2.47776e-12	Huntingtin-interacting protein 14
FBgn0037236	Skp2	0.977574	3.78777e-29	0.909548	3.86433e-27	S-phase kinase-associated protein 2
FBgn0004837	Su(H)	1.2769	3.8059e-29	1.14349	3.39369e-25	Suppressor of Hairless
FBgn0260941	app	1.88645	3.89024e-29	0.781807	2.21621e-06	approximated
FBgn0026401	Nipped-B	2.25313	3.94533e-29	1.38092	1.25269e-12	Nipped-B
FBgn0027611	LManII	2.60775	5.52425e-29	1.47494	6.46631e-11	Lysosomal alpha-mannosidase II
FBgn0036518	RhoGAP71E	1.29289	6.22425e-29	0.816986	3.19735e-13	Rho GTPase activating protein at 71E
FBgn0265276	l(3)neo38	2.43966	6.26006e-29	1.38375	6.46548e-11	lethal (3) neo38
FBgn0031020	Naa15-16	0.756212	7.4975e-29	0.585094	4.48266e-19	N(alpha)-acetyltransferase 15/16
FBgn0037554	PolI	1.04794	8.07005e-29	0.71136	6.23955e-15	DNA polymerase iota
FBgn0011286	RyR	4.07866	9.50693e-29	1.36109	0.000109024	Ryanodine receptor
FBgn0003028	ovo	0.72456	1.179e-28	0.601648	1.16564e-21	ovo
FBgn0261243	Psa	1.19845	1.42839e-28	0.735751	2.19487e-12	Puromycin sensitive aminopeptidase
FBgn0038532	CG14322	1.04555	1.4616e-28	0.598774	6.5769e-11	-
FBgn0003231	ref(2)P	0.86719	1.56975e-28	0.614883	4.51614e-16	refractory to sigma P
FBgn0250907	Cht10	2.93218	2.06422e-28	1.99494	8.08566e-15	Chitinase 10
FBgn0030365	Tango4	2.10207	2.14919e-28	2.52554	2.35027e-43	Transport and Golgi organization 4
FBgn0260243	E(var)3-9	1.14394	2.22533e-28	1.07978	2.5752e-27	Enhancer of variegation 3-9
FBgn0266580	Gp210	2.42022	2.83619e-28	1.40441	3.98143e-11	Glycoprotein 210 kDa
FBgn0040271	Sulf1	2.3225	3.06863e-28	1.60335	3.30195e-15	Sulfated
FBgn0037240	Cont	2.38495	3.76124e-28	1.54506	1.64406e-13	Contactin
FBgn0003218	rdgB	0.83088	3.82763e-28	0.625705	1.16208e-17	retinal degeneration B
FBgn0039209	REPTOR	1.26642	4.02364e-28	0.926508	8.45857e-17	Repressed by TOR
FBgn0030189	CG2909	1.29535	4.82175e-28	1.02106	2.29947e-18	-
FBgn0030502	tth	1.21954	4.97933e-28	0.781373	3.75257e-13	toothrin
FBgn0262656	Myc	1.58709	5.04828e-28	0.919837	5.31398e-11	Myc
FBgn0016059	Sema1b	2.54519	5.45182e-28	1.80731	6.68037e-16	Semaphorin 1b
FBgn0001079	fu	1.12581	5.91585e-28	0.765007	1.62089e-14	fused
FBgn0032517	CG7099	1.89605	6.21018e-28	1.15776	4.89412e-12	-
FBgn0038549	Nnk	1.06535	6.3678e-28	0.871753	3.32301e-20	Nicknack
FBgn0025684	MFS18	1.19685	7.47435e-28	0.720035	1.36114e-11	Major Facilitator Superfamily Transporter 18
FBgn0264707	RhoGEF3	1.1886	8.66815e-28	0.858596	3.32367e-16	Rho guanine nucleotide exchange factor 3
FBgn0031001	CG7884	3.0532	1.35561e-27	1.50422	2.13889e-08	-
FBgn0034087	clu	1.47576	1.62092e-27	0.943978	6.49217e-13	clueless
FBgn0038601	Polr1E	0.930465	1.67736e-27	1.6441	3.75622e-83	RNA polymerase I subunit E
FBgn0052451	SPoCk	2.0588	2.54764e-27	1.29905	1.60993e-12	Secretory Pathway Calcium atpase
FBgn0003093	Pkc98E	1.20588	2.82958e-27	0.771125	1.19632e-12	Protein C kinase 98E
FBgn0052791	DIP-Œ±	1.99189	2.89806e-27	1.13698	2.13742e-10	Dpr-interacting protein alpha
FBgn0005672	spi	1.12713	3.25154e-27	0.724277	1.03428e-12	spitz
FBgn0030625	CG5877	1.32181	3.87101e-27	0.709243	2.76749e-09	-
FBgn0039186	CG5746	1.00151	4.37622e-27	0.84478	4.11944e-21	-
FBgn0027330	l(1)G0020	1.257	4.95698e-27	0.682715	1.93053e-09	lethal (1) G0020
FBgn0001987	Gli	2.03168	5.37035e-27	1.27314	3.519e-12	Gliotactin
FBgn0001323	knrl	1.60192	5.46063e-27	1.0124	1.21995e-11	knirps-like
FBgn0087035	AGO2	1.34559	5.73249e-27	0.843579	3.38758e-12	Argonaute 2
FBgn0266000	CG44774	1.67474	6.32982e-27	1.02271	1.22788e-11	-
FBgn0032957	CG2225	1.68403	8.24483e-27	1.34699	9.49292e-19	-
FBgn0050115	GEFmeso	3.14161	8.49509e-27	1.78406	2.50257e-10	Guanine nucleotide exchange factor in mesoderm
FBgn0014006	Ask1	1.21396	9.38058e-27	0.767545	2.77305e-12	Apoptotic signal-regulating kinase 1
FBgn0000183	BicD	1.04928	1.07696e-26	0.910753	5.39622e-22	Bicaudal D
FBgn0035235	CG7879	1.32621	1.3554e-26	1.00524	8.42464e-17	-
FBgn0010583	dock	0.849627	1.63726e-26	0.58761	3.38024e-14	dreadlocks
FBgn0020407	asun	0.972671	1.65741e-26	0.831695	1.35526e-20	asunder
FBgn0010313	corto	1.11932	1.89267e-26	0.651999	1.74281e-10	corto
FBgn0265574	Cdc5	0.857619	1.92931e-26	0.679012	4.36022e-18	Cell division cycle 5
FBgn0286785	scb	2.60765	2.49863e-26	1.13591	1.15182e-06	scab
FBgn0037705	mura	1.48601	3.08363e-26	0.728691	1.10902e-07	murashka
FBgn0015380	drl	2.52965	3.29022e-26	1.06239	4.46832e-06	derailed
FBgn0029944	Dok	0.75465	3.43818e-26	0.689036	1.71625e-23	Downstream of kinase
FBgn0283741	prage	1.6135	3.68447e-26	1.13235	2.4621e-14	prage
FBgn0030268	Klp10A	1.13146	5.21411e-26	1.131	5.26378e-28	Kinesin-like protein at 10A
FBgn0263256	CG43394	2.11328	5.58925e-26	0.900269	3.93728e-06	-
FBgn0003654	sw	2.09628	5.63645e-26	1.52374	2.28391e-15	short wing
FBgn0025741	PlexA	2.20107	5.92947e-26	1.15348	1.41288e-08	Plexin A
FBgn0035625	Blimp-1	2.48671	6.44481e-26	1.38099	1.57969e-09	Blimp-1
FBgn0013759	CASK	0.989852	7.37173e-26	0.733514	8.53935e-16	CASK
FBgn0030631	Prp5	1.09761	9.2375e-26	0.802193	2.37248e-15	pre-mRNA processing factor 5
FBgn0013799	Deaf1	1.27301	1.03076e-25	1.0066	9.79554e-18	Deformed epidermal autoregulatory factor-1
FBgn0036402	CG6650	1.24654	1.33073e-25	0.845282	2.93828e-13	-
FBgn0024921	Tnpo	1.47274	1.33485e-25	1.21016	4.23492e-19	Transportin
FBgn0010660	Nup214	1.05817	1.58327e-25	0.635833	9.99552e-11	Nucleoporin 214kD
FBgn0004635	rho	1.5772	1.72463e-25	0.899947	1.90533e-09	rhomboid
FBgn0261269	conv	1.84461	1.73819e-25	0.843173	1.15572e-06	convoluted
FBgn0035060	Eps-15	1.65102	1.75615e-25	0.947186	7.03623e-10	Epidermal growth factor receptor pathway substrate clone 15
FBgn0004118	nAChRŒ≤2	2.63468	1.79587e-25	1.16396	7.90464e-07	nicotinic Acetylcholine Receptor beta2
FBgn0039923	MED26	1.80395	1.88395e-25	1.33083	1.47777e-15	Mediator complex subunit 26
FBgn0033482	CG1371	1.64085	2.02491e-25	0.765252	6.86239e-07	-
FBgn0029891	Pink1	1.06264	2.1654e-25	0.638138	1.22742e-10	PTEN-induced putative kinase 1
FBgn0039501	TTLL6B	2.36745	2.53201e-25	1.31314	2.57592e-09	Tubulin tyrosine ligase-like 6B
FBgn0035410	MnM	2.75974	2.61493e-25	1.11055	1.11997e-05	myomesin and myosin binding protein
FBgn0028341	Ptpmeg2	1.10052	4.42037e-25	0.906907	9.68514e-19	Protein tyrosine phosphatase Meg2
FBgn0033177	CG11141	1.1652	4.72998e-25	0.75849	4.05799e-12	-
FBgn0037336	CG2519	1.60446	5.61616e-25	0.987842	5.386e-11	-
FBgn0035111	Dis3l2	0.889567	6.01374e-25	0.656908	3.43237e-15	Dis3 like 3'-5' exoribonuclease 2
FBgn0027539	lili	1.05984	6.26022e-25	0.643017	1.25532e-10	lilipod
FBgn0000723	FER	2.00711	9.71106e-25	1.30039	1.02525e-11	FER tyrosine kinase
FBgn0036368	CG10738	1.73468	1.03268e-24	0.935259	1.73377e-08	-
FBgn0032341	Reps	1.04884	1.19603e-24	0.729932	1.65097e-13	RALBP1 associated Eps domain containing
FBgn0028875	nAChRŒ±5	3.6376	1.27405e-24	1.32631	1.27396e-05	nicotinic Acetylcholine Receptor alpha5
FBgn0029685	CG2938	1.71423	1.47049e-24	0.958696	4.01263e-09	-
FBgn0038755	Hs6st	2.31385	1.98961e-24	1.68395	1.55727e-14	Heparan sulfate 6-O-sulfotransferase
FBgn0039167	CG17786	2.21399	2.04205e-24	0.776704	0.000240303	-
FBgn0024366	CG11409	2.35925	2.04499e-24	0.967701	1.2899e-05	-
FBgn0004666	sim	2.16586	2.57175e-24	1.1207	5.78901e-08	single-minded
FBgn0259244	CG42342	2.87538	2.6517e-24	1.37332	5.44817e-07	-
FBgn0040397	CG3655	1.6869	2.80974e-24	1.15351	6.50919e-13	-
FBgn0035229	pns	0.924307	3.11528e-24	0.60486	7.12182e-12	pinstripe
FBgn0261794	kcc	1.80095	3.14681e-24	1.20874	2.01273e-12	kazachoc
FBgn0001991	Ca-Œ±1D	3.65115	3.8429e-24	1.47244	2.48015e-06	Ca[2+]-channel protein alpha[[1]] subunit D
FBgn0003285	rst	1.53387	3.92182e-24	0.930039	2.99912e-10	roughest
FBgn0261286	Mat89Ba	1.12986	3.93675e-24	0.77299	8.50671e-13	Maternal transcript 89Ba
FBgn0028331	l(1)G0289	2.31313	5.63249e-24	1.96832	4.15791e-19	lethal (1) G0289
FBgn0010328	woc	1.17244	5.67608e-24	1.36756	1.07822e-34	without children
FBgn0026577	CG8677	2.1571	5.74239e-24	1.25004	1.66999e-09	-
FBgn0035333	CG1317	1.25884	6.82398e-24	0.659725	6.56005e-08	-
FBgn0005674	GluProRS	1.42488	7.42637e-24	0.732815	1.1083e-07	Glutamyl-prolyl-tRNA synthetase
FBgn0052698	CARPB	1.88239	8.83738e-24	0.837426	4.84558e-06	Carbonic anhydrase-related protein B
FBgn0267821	da	0.611049	8.85166e-24	0.60125	1.35706e-24	daughterless
FBgn0000629	E(z)	1.3075	9.37826e-24	1.34888	4.88818e-27	Enhancer of zeste
FBgn0026189	promL	2.3153	1.25543e-23	1.69003	3.53813e-14	prominin-like
FBgn0087012	5-HT2A	2.52017	1.41282e-23	1.44183	3.20244e-09	5-hydroxytryptamine (serotonin) receptor 2A
FBgn0003710	tipE	1.45271	1.74954e-23	0.769586	2.29287e-07	temperature-induced paralytic E
FBgn0265182	CG44247	2.275	1.77071e-23	1.41717	2.50049e-10	-
FBgn0004657	mys	2.23342	1.8044e-23	1.50612	3.31617e-12	myospheroid
FBgn0035424	Larp4B	1.13166	2.00189e-23	0.876205	1.14846e-15	La-related protein 4B
FBgn0259111	Ndae1	2.33367	2.01462e-23	1.23389	5.95717e-08	Na[+]-driven anion exchanger 1
FBgn0052815	CG32815	2.59978	2.34245e-23	0.938923	8.41434e-05	-
FBgn0023528	CG2924	1.01625	3.29e-23	0.711567	6.44376e-13	-
FBgn0259938	cwo	0.970155	3.65138e-23	0.639954	1.8911e-11	clockwork orange
FBgn0051368	CG31368	1.36724	3.71364e-23	0.983746	1.67918e-13	-
FBgn0028539	Eato	2.58924	3.90414e-23	1.88686	7.37776e-14	Engulfment ABC Transporter in the ovary
FBgn0051118	RabX4	1.6232	4.17106e-23	1.35346	3.93603e-15	RabX4
FBgn0027601	pdgy	1.05829	4.89179e-23	0.922854	5.21883e-19	pudgy
FBgn0052365	CG32365	2.32557	4.97711e-23	1.51628	2.75358e-11	-
FBgn0045852	ham	3.24503	5.41734e-23	2.05243	6.94859e-11	hamlet
FBgn0262473	Tl	2.35776	5.9149e-23	1.60449	3.6968e-12	Toll
FBgn0036684	CG3764	1.12272	6.30757e-23	0.859947	5.34651e-15	-
FBgn0259170	Œ±-Man-Ia	1.86161	7.15721e-23	1.28508	2.02979e-12	alpha-Mannosidase class I a
FBgn0027528	goe	2.78543	7.57965e-23	2.36818	4.33495e-18	gone early
FBgn0002723	Met	1.21126	8.05576e-23	0.742911	6.39273e-10	Methoprene-tolerant
FBgn0283472	S6k	1.84282	9.16156e-23	1.79939	1.87282e-23	Ribosomal protein S6 kinase
FBgn0026369	Sara	1.0548	1.13259e-22	0.777654	7.82035e-14	Smad anchor for receptor activation
FBgn0043854	slam	1.88968	1.17721e-22	0.850937	7.10899e-06	slow as molasses
FBgn0267104	CG45544	2.32379	2.15068e-22	1.3661	2.78598e-09	-
FBgn0020620	RN-tre	0.748381	2.54396e-22	0.642121	1.05521e-17	Related to the N terminus of tre oncogene
FBgn0263864	Dark	1.17685	2.65428e-22	0.587496	7.54767e-07	Death-associated APAF1-related killer
FBgn0263132	Cht6	3.20086	2.84893e-22	1.7487	1.1078e-08	Chitinase 6
FBgn0029834	CG5937	3.38238	2.9034e-22	1.24937	8.41034e-05	-
FBgn0037633	CG9839	0.928301	3.04439e-22	0.646585	1.24379e-11	-
FBgn0263873	sick	3.18118	3.07873e-22	1.47535	3.58013e-06	sickie
FBgn0024191	sip1	0.886036	3.18871e-22	0.756021	3.90322e-17	septin interacting protein 1
FBgn0028982	Spt6	1.64531	3.20984e-22	1.57286	4.90003e-22	Spt6
FBgn0039936	Gyf	1.32695	3.77099e-22	0.983967	1.00907e-13	Gigyf
FBgn0036299	Tsf2	1.25231	3.89275e-22	0.686724	5.39527e-08	Transferrin 2
FBgn0037753	CG12947	2.14893	3.9076e-22	0.776255	0.000280545	-
FBgn0051897	CG31897	1.78721	3.97252e-22	0.844351	3.3073e-06	-
FBgn0037924	CG14712	3.47111	3.98789e-22	2.10301	1.53031e-09	-
FBgn0011653	mas	3.2659	4.30061e-22	1.82388	8.99355e-09	masquerade
FBgn0266801	CG45263	2.39559	5.31709e-22	1.17604	1.1861e-06	-
FBgn0085446	CG34417	2.62385	5.43008e-22	1.07583	4.45865e-05	-
FBgn0087007	bbg	2.02127	5.85167e-22	1.09242	9.37283e-08	big bang
FBgn0011725	twin	0.974996	6.98485e-22	0.951825	1.72319e-22	twin
FBgn0037000	ZnT77C	1.89061	6.98485e-22	0.969162	4.70497e-07	Zinc transporter 77C
FBgn0034540	Lrt	2.39812	7.41139e-22	1.35065	2.44003e-08	Leucine-rich tendon-specific protein
FBgn0041182	Tep2	3.26188	7.4602e-22	1.1646	0.000270582	Thioester-containing protein 2
FBgn0039773	CG2224	0.664011	1.00705e-21	0.617729	3.89141e-19	-
FBgn0004956	upd1	1.76909	1.1623e-21	0.992395	5.14601e-08	unpaired 1
FBgn0262519	Mi-2	1.2553	1.34783e-21	1.08846	7.55128e-18	Mi-2
FBgn0003321	sbr	0.915404	1.37546e-21	0.936346	4.72757e-24	small bristles
FBgn0004102	oc	2.20951	1.4153e-21	1.34846	2.1612e-09	ocelliless
FBgn0030420	pira	1.07592	1.49041e-21	0.832544	2.40922e-14	pirate
FBgn0034021	CG8180	1.83482	1.57981e-21	1.08614	6.36083e-09	-
FBgn0020312	Tmtc3	0.969111	1.58035e-21	0.729241	1.35962e-13	Transmembrane O-mannosyltransferase targeting cadherins 3
FBgn0053554	Nipped-A	1.63132	1.72176e-21	0.894503	8.4121e-08	Nipped-A
FBgn0036287	CG10663	2.52887	1.91559e-21	1.40036	4.53388e-08	-
FBgn0032901	sky	1.68735	2.33887e-21	0.907925	2.95389e-07	skywalker
FBgn0083977	CG34141	2.99639	2.35837e-21	1.18672	3.65152e-05	-
FBgn0050069	Sdb	2.9251	2.5409e-21	1.29687	7.42501e-06	SAXO downstream of blistered
FBgn0002645	Map205	1.4173	3.00747e-21	0.844491	6.50107e-09	Microtubule-associated protein 205
FBgn0035848	Uxs	1.87271	3.2704e-21	1.365	1.1255e-12	UDP-xylose synthase
FBgn0005631	robo1	3.01088	3.45808e-21	1.36179	1.19022e-05	roundabout 1
FBgn0029887	CG3198	1.1406	3.48978e-21	0.825687	1.97121e-12	-
FBgn0035888	CG7120	0.8851	3.65414e-21	0.676991	6.12351e-13	-
FBgn0033483	egr	1.65411	3.69799e-21	0.938429	5.02909e-08	eiger
FBgn0002306	sas	2.67412	3.84631e-21	1.00771	0.000254302	stranded at second
FBgn0034997	CG3376	1.45518	4.13297e-21	0.604074	7.61915e-05	-
FBgn0034859	CG3520	1.24882	4.42033e-21	1.06156	1.48492e-16	-
FBgn0020633	Mcm7	0.982305	4.66251e-21	0.687037	9.97762e-12	Minichromosome maintenance 7
FBgn0027660	blot	1.44398	5.24328e-21	0.682944	5.87364e-06	bloated tubules
FBgn0000166	bcd	2.33681	5.43912e-21	1.18567	1.06928e-06	bicoid
FBgn0020510	Abi	0.826551	5.69558e-21	0.630458	1.55375e-13	Abelson interacting protein
FBgn0052829	CG32829	2.82577	6.93237e-21	1.48883	1.33353e-07	-
FBgn0036791	CG7271	1.34823	7.08732e-21	1.40566	1.34493e-22	-
FBgn0005617	msl-1	1.33856	7.99999e-21	0.890728	1.23758e-10	male-specific lethal 1
FBgn0027079	ValRS	1.10782	8.23606e-21	0.605537	1.62177e-07	Valyl-tRNA synthetase
FBgn0030301	HP5	0.913151	8.63519e-21	0.681929	4.93658e-13	Heterochromatin protein 5
FBgn0023213	eIF4G1	1.44707	8.63859e-21	1.34849	1.13866e-19	eukaryotic translation initiation factor 4G1
FBgn0000097	aop	1.54554	1.04099e-20	1.14797	7.05255e-13	anterior open
FBgn0015396	jumu	0.900799	1.0597e-20	0.718713	1.20405e-14	jumeau
FBgn0023479	teq	2.39866	1.08834e-20	1.49737	3.19485e-09	Tequila
FBgn0261461	RhoGAP18B	1.16621	1.21187e-20	1.14818	2.23672e-21	Rho GTPase activating protein at 18B
FBgn0263113	Cc2d2a	3.14001	1.54609e-20	1.08321	0.000560757	Coiled-coil and C2 domain containing 2A
FBgn0034722	Rtf1	1.52	1.6498e-20	2.04273	9.41879e-39	Rtf1
FBgn0035113	pyx	1.65662	1.77893e-20	0.665644	0.000183399	pyrexia
FBgn0067779	dbr	0.977241	1.77893e-20	0.789444	8.93366e-15	debra
FBgn0010352	Ogdh	1.77114	2.4853e-20	0.985473	1.33429e-07	Oxoglutarate dehydrogenase
FBgn0002989	okr	1.09763	2.94171e-20	0.770582	2.78598e-11	okra
FBgn0267336	Glut4EF	2.41416	3.15377e-20	1.20238	2.6554e-06	Glucose transporter 4 enhancer factor
FBgn0261403	sxc	1.24189	3.26292e-20	0.940099	5.02985e-13	super sex combs
FBgn0031239	CG17075	2.76445	3.66066e-20	0.984998	0.00063553	-
FBgn0259140	Cubn2	3.19133	3.84863e-20	1.36161	7.81689e-06	Cubulin 2
FBgn0011336	Stt3B	1.43552	3.88228e-20	0.901966	2.83928e-09	Catalytic subunit 3B of the oligosaccharyltransferase complex
FBgn0267033	mamo	2.79843	4.07268e-20	1.46858	2.43384e-07	maternal gene required for meiosis
FBgn0001138	grn	2.36537	4.0938e-20	1.363	5.23672e-08	grain
FBgn0039234	Nct	2.17034	5.26463e-20	1.68278	1.80612e-13	Nicastrin
FBgn0020412	JIL-1	1.54059	5.49814e-20	1.13578	2.77483e-12	JIL-1 kinase
FBgn0002917	na	3.66684	5.52333e-20	1.89216	5.28309e-07	narrow abdomen
FBgn0026323	Tak1	1.2456	5.74157e-20	0.685825	2.48514e-07	TGF-beta activated kinase 1
FBgn0243511	psidin	0.973693	6.16054e-20	0.618074	2.50059e-09	phagocyte signaling impaired
FBgn0036124	CG7839	1.02213	6.21559e-20	0.596787	4.38779e-08	-
FBgn0262029	d	2.08081	7.12041e-20	0.980975	1.15867e-05	dachs
FBgn0262871	lute	1.23659	7.44988e-20	1.11541	1.55633e-17	lute
FBgn0031990	PAPLA1	1.19101	8.07519e-20	0.781967	7.03344e-10	Phosphatidic Acid Phospholipase A1
FBgn0037248	srl	1.4924	1.21087e-19	1.54249	1.47147e-22	spargel
FBgn0038269	Rrp6	0.983816	1.38111e-19	1.0274	1.18637e-22	Rrp6
FBgn0027582	CG6230	2.07934	1.40557e-19	0.985032	1.27681e-05	-
FBgn0013987	MAPk-Ak2	0.722708	1.68337e-19	0.95863	4.60655e-35	MAP kinase activated protein-kinase-2
FBgn0004646	ogre	1.98512	2.12051e-19	1.02405	2.08057e-06	optic ganglion reduced
FBgn0001122	GŒ±o	1.03121	2.29834e-19	0.917432	1.22448e-16	G protein alpha o subunit
FBgn0035956	Doc2	2.03673	2.37032e-19	1.29899	4.77354e-09	Dorsocross2
FBgn0085413	CG34384	3.73705	2.94669e-19	1.36358	0.000192471	-
FBgn0052062	Rbfox1	1.29452	3.27746e-19	1.13851	4.26352e-16	RNA-binding Fox protein 1
FBgn0010905	Spn	2.7399	3.34807e-19	1.41524	2.2724e-06	Spinophilin
FBgn0031492	Prp40	0.610167	3.55318e-19	0.851043	2.62454e-37	pre-mRNA processing factor 40
FBgn0263316	Mrp4	2.03515	3.73623e-19	1.06435	1.8712e-06	Multidrug resistance protein 4
FBgn0262169	magu	1.38495	3.80686e-19	0.772906	3.1914e-07	magu
FBgn0037556	CG9636	1.12208	4.68105e-19	1.00019	1.80873e-16	-
FBgn0023515	Gcna	1.62989	4.81088e-19	1.72889	5.99389e-23	Germ cell nuclear acidic peptidase
FBgn0263755	Su(var)3-9	0.821037	4.89848e-19	0.755128	5.44424e-17	Suppressor of variegation 3-9
FBgn0040505	Alk	3.35716	6.48244e-19	1.32919	0.000218558	Anaplastic lymphoma kinase
FBgn0031294	IA-2	3.42288	6.74529e-19	1.48742	1.21784e-05	IA-2 protein tyrosine phosphatase
FBgn0010395	Itgbn	2.17041	6.83103e-19	0.955154	5.7471e-05	Integrin betanu subunit
FBgn0031401	papi	1.58497	7.8616e-19	1.36758	4.90206e-15	papi
FBgn0052000	anne	1.6186	7.9719e-19	0.930121	1.72821e-07	anne boleyn
FBgn0086129	snama	0.894584	8.32146e-19	0.72067	1.57908e-13	something that sticks like glue
FBgn0085407	Pvf3	3.05464	9.23479e-19	1.46725	1.07078e-05	PDGF- and VEGF-related factor 3
FBgn0263232	Nxf3	1.08459	9.98428e-19	0.752668	2.61483e-10	Nuclear export factor 3
FBgn0003300	run	1.56951	1.00298e-18	0.678914	0.000118757	runt
FBgn0028467	Ube4A	0.856141	1.0393e-18	0.665825	1.38459e-12	Ubiquitination factor E4A
FBgn0286511	Pld	1.14714	1.08278e-18	0.860175	7.39198e-12	Phospholipase D
FBgn0051195	CG31195	1.69224	1.17124e-18	0.976461	1.77579e-07	-
FBgn0265274	Inx3	2.01479	1.18823e-18	1.1713	1.45924e-07	Innexin 3
FBgn0031574	TTLL4B	1.58498	1.27669e-18	1.11079	3.67333e-10	Tubulin tyrosine ligase-like 4B
FBgn0031251	CG4213	3.03492	1.39541e-18	1.36663	1.04077e-05	-
FBgn0032130	brwl	0.886665	1.42641e-18	0.666611	1.05598e-11	brickwall
FBgn0021800	Reph	1.24475	1.67966e-18	0.721356	1.88124e-07	Regulator of eph expression
FBgn0036463	Reck	2.39493	1.71573e-18	1.11697	2.62931e-05	Reversion-inducing-cysteine-rich protein with kazal motifs
FBgn0033450	Lsm11	1.28481	1.71575e-18	1.10055	1.81637e-14	Lsm11
FBgn0033479	PIG-N	1.99338	1.79659e-18	1.04087	2.92085e-06	Phosphatidylinositol glycan anchor biosynthesis class N
FBgn0029067	Dd	1.38125	1.88629e-18	0.983516	1.19266e-10	Dullard
FBgn0015903	apt	0.677036	1.9478e-18	0.684808	3.97268e-20	apontic
FBgn0038279	Sdr	2.9521	2.13286e-18	2.4948	3.01649e-14	Secreted decoy of InR
FBgn0004957	por	1.33624	2.13859e-18	0.640475	2.10783e-05	porcupine
FBgn0000320	eya	2.69144	2.85113e-18	1.76889	3.58962e-09	eyes absent
FBgn0000116	Argk1	0.750774	3.36155e-18	0.614649	1.6161e-13	Arginine kinase 1
FBgn0003683	term	1.24069	3.53395e-18	1.46627	1.63016e-24	terminus
FBgn0027108	Inx2	1.4061	4.02247e-18	0.782966	7.6008e-07	Innexin 2
FBgn0050122	CG30122	1.17371	4.15943e-18	0.71892	4.80165e-08	-
FBgn0029175	sotv	2.08073	4.82201e-18	1.10343	2.70709e-06	sister of tout-velu
FBgn0019650	toy	1.87085	6.35337e-18	1.17626	4.03363e-08	twin of eyeless
FBgn0038395	Jhbp5	1.34889	6.62643e-18	0.669347	2.85138e-05	Juvenile hormone binding protein 5
FBgn0024245	dnt	1.09777	8.11482e-18	0.681357	4.88646e-08	doughnut on 2
FBgn0037063	CG9391	1.19425	9.05697e-18	1.28783	8.00894e-22	-
FBgn0038300	Mau2	1.03964	1.06203e-17	0.965358	2.49553e-16	Mau2 sister chromatid cohesion factor
FBgn0019686	lok	0.686584	1.16069e-17	0.907653	4.39973e-32	loki
FBgn0263930	dally	2.81314	1.23319e-17	1.21812	0.000141294	division abnormally delayed
FBgn0051038	CG31038	3.00779	1.27571e-17	1.56228	3.37465e-06	-
FBgn0010389	htl	1.69761	1.46851e-17	1.22352	7.36401e-10	heartless
FBgn0039738	Mgat2	2.59051	1.49112e-17	1.25651	2.01671e-05	Mannosyl (alpha-1
FBgn0260866	dnr1	1.39736	1.52539e-17	1.05929	4.42493e-11	defense repressor 1
FBgn0027575	GABA-B-R2	2.83293	1.66091e-17	1.35354	1.61791e-05	metabotropic GABA-B receptor subtype 2
FBgn0034501	CG13868	1.25688	1.92738e-17	0.858202	4.77109e-09	-
FBgn0052016	4E-T	0.99438	2.29481e-17	0.7607	1.9194e-11	eIF4E-Transporter
FBgn0287182	l(3)80Fj	1.54811	2.711e-17	0.955631	7.94211e-08	lethal (3) 80Fj
FBgn0085376	CG34347	2.25296	2.90552e-17	1.2338	2.17945e-06	-
FBgn0031573	CG3407	1.36433	3.12293e-17	1.60439	6.44676e-25	-
FBgn0001341	Mybbp1A	0.92042	3.2017e-17	0.787644	8.69397e-14	MYB binding protein 1a
FBgn0038881	aus	3.21744	3.30784e-17	1.45566	9.47031e-05	argus
FBgn0037757	CG8516	1.06745	3.39522e-17	0.971121	1.74205e-15	-
FBgn0259113	PolA1	0.92646	3.51983e-17	0.73543	4.33621e-12	DNA polymerase alpha subunit 1
FBgn0027588	GCS2Œ±	1.98223	4.23387e-17	1.37805	1.59613e-09	Glucosidase 2 alpha subunit
FBgn0041605	cpx	2.34984	4.3757e-17	1.3261	1.04164e-06	complexin
FBgn0041723	rho-5	2.91303	4.42105e-17	1.88481	1.8381e-08	rhomboid-5
FBgn0031266	Sf3b1	1.9094	4.75571e-17	0.843729	0.000180266	Splicing factor 3b subunit 1
FBgn0029693	Cmtr1	0.601983	4.9264e-17	0.81325	1.30738e-30	Cap methyltransferase 1
FBgn0032256	RluA-2	1.10414	5.15062e-17	1.36466	3.71831e-26	RluA pseudouridine synthase 2
FBgn0031233	Tbc1d15-17	0.644035	6.05603e-17	0.697943	1.03756e-20	TBC1 domain family member 15/17
FBgn0031869	CG18304	2.64784	6.20742e-17	1.05321	0.000681063	-
FBgn0039536	unc80	3.88054	6.41215e-17	2.14025	3.85133e-07	uncoordinated 80
FBgn0285896	btl	2.86008	6.76845e-17	1.43472	1.50247e-05	breathless
FBgn0001325	Kr	1.58731	6.93405e-17	1.20482	7.7459e-11	Kruppel
FBgn0003882	tub	0.905516	7.52319e-17	0.698432	3.23714e-11	tube
FBgn0003117	pnr	1.73372	7.70537e-17	0.99565	1.14065e-06	pannier
FBgn0016754	sba	0.822779	9.15573e-17	0.66738	4.33621e-12	six-banded
FBgn0023090	dtr	2.70224	1.09714e-16	1.90592	6.28675e-09	defective transmitter release
FBgn0030739	SWIP	0.987166	1.1047e-16	0.601081	2.77249e-07	Strumpellin and WASH-interacting protein
FBgn0004374	neb	0.900028	1.11248e-16	0.716411	9.84777e-12	nebbish
FBgn0267571	lncRNA:CR45911	2.00659	1.30315e-16	0.844451	0.00041582	long non-coding RNA:CR45911
FBgn0015838	Vang	0.907347	1.43975e-16	0.656593	8.05612e-10	Van Gogh
FBgn0086532	Spt-I	1.50495	1.54768e-16	0.982161	3.1151e-08	Serine palmitoyltransferase subunit I
FBgn0250732	gfzf	0.819339	1.5757e-16	0.724598	4.25972e-14	GST-containing FLYWCH zinc-finger protein
FBgn0036150	Ir68a	2.04126	1.67042e-16	1.23742	4.54868e-07	Ionotropic receptor 68a
FBgn0086681	Mst36Fa	2.64375	2.13081e-16	1.12638	0.000206924	Male-specific transcript 36Fa
FBgn0028789	Doc1	1.39165	2.15356e-16	1.14567	1.44343e-11	Dorsocross1
FBgn0000635	Fas2	2.91447	2.23882e-16	1.44221	3.16924e-05	Fasciclin 2
FBgn0031632	CG15628	1.39933	2.38813e-16	1.2188	1.69971e-13	-
FBgn0031814	retm	1.02716	2.76855e-16	0.640721	1.68932e-07	real-time
FBgn0286071	AdamTS-A	3.22977	3.19908e-16	1.89683	3.59153e-07	ADAM metallopeptidase with thrombospondin type 1 motif A
FBgn0016794	dos	1.41052	3.36803e-16	1.8423	9.8834e-29	daughter of sevenless
FBgn0264502	CG43901	2.99299	3.70081e-16	1.83255	1.97659e-07	-
FBgn0000439	Dfd	1.7518	3.71354e-16	0.899017	2.75809e-05	Deformed
FBgn0262483	Rbp	4.22129	4.11695e-16	1.85362	5.1061e-05	RIM-binding protein
FBgn0031608	CG15435	1.02826	4.19657e-16	1.05063	1.03732e-17	-
FBgn0085424	nub	1.78044	6.52808e-16	1.33672	5.52195e-10	nubbin
FBgn0264894	CG44085	2.50954	7.4371e-16	1.2572	2.90786e-05	-
FBgn0013811	Dhc62B	3.52749	7.69683e-16	1.68425	4.56869e-05	Dynein heavy chain at 62B
FBgn0032876	Cen	0.979204	7.9917e-16	0.773702	4.47731e-11	Centrocortin
FBgn0014007	Ptp69D	2.03851	8.86914e-16	1.64853	1.567e-11	Protein tyrosine phosphatase 69D
FBgn0051973	Cda5	2.36451	1.07569e-15	1.11669	0.00010037	Chitin deacetylase-like 5
FBgn0288433	L	1.57839	1.07963e-15	2.06911	4.18615e-05	Lobe
FBgn0016122	Acer	2.20459	1.21064e-15	1.81682	9.11509e-12	Angiotensin-converting enzyme-related
FBgn0032683	kon	3.32311	1.29846e-15	1.50573	0.00017978	kon-tiki
FBgn0085409	smal	3.3011	1.43973e-15	1.52149	0.000182123	smoke alarm
FBgn0051145	CG31145	1.19219	1.79942e-15	0.724657	1.99133e-06	-
FBgn0010113	hdc	1.21892	1.86e-15	0.628783	3.06975e-05	headcase
FBgn0035264	Oseg4	2.29556	1.94537e-15	1.22163	1.5496e-05	Outer segment 4
FBgn0085433	CG34404	1.26373	2.03086e-15	0.841199	8.47691e-08	-
FBgn0039380	CG5890	3.24462	2.07501e-15	2.5224	4.61864e-09	-
FBgn0285955	cv-c	3.44885	2.12988e-15	1.62599	0.000145015	crossveinless c
FBgn0004839	otk	2.99037	2.35836e-15	1.65741	5.88417e-06	off-track
FBgn0031673	CG31650	1.83158	2.48996e-15	1.26605	1.81696e-08	-
FBgn0015623	Cpr	1.42631	2.49177e-15	1.02643	4.12273e-09	Cytochrome P450 reductase
FBgn0015399	kek1	2.26682	3.3597e-15	1.25067	7.72851e-06	kekkon 1
FBgn0263236	SP1029	2.10841	3.64745e-15	1.43429	3.57795e-08	SP1029
FBgn0259214	PMCA	2.00091	4.12553e-15	1.39604	1.61524e-08	plasma membrane calcium ATPase
FBgn0262111	f	2.70183	4.39138e-15	1.50847	5.68625e-06	forked
FBgn0040071	tara	1.36132	4.46894e-15	0.929462	5.44718e-08	taranis
FBgn0034075	Asph	1.72782	4.54113e-15	0.906642	3.02578e-05	Aspartyl beta-hydroxylase
FBgn0028996	onecut	2.88173	4.60211e-15	1.54805	1.42859e-05	onecut
FBgn0260005	wtrw	1.75929	5.02357e-15	1.13783	3.98484e-07	water witch
FBgn0287696	mus302	0.687751	5.16836e-15	0.60389	1.4649e-12	mutagen-sensitive 302
FBgn0034797	nahoda	2.2818	7.48093e-15	1.23118	1.7479e-05	nahoda
FBgn0263239	dar1	3.61195	8.17271e-15	1.84645	9.38121e-06	dendritic arbor reduction 1
FBgn0036147	Plod	1.78337	8.74049e-15	1.58962	1.00042e-12	procollagen lysyl hydroxylase
FBgn0025936	Eph	2.03925	9.28881e-15	1.52293	2.20743e-09	Eph receptor tyrosine kinase
FBgn0034110	Atg9	1.3822	9.44847e-15	1.26513	4.24817e-13	Autophagy-related 9
FBgn0014388	sty	2.12559	1.13225e-14	1.28218	1.88154e-06	sprouty
FBgn0004644	hh	2.11953	1.14716e-14	1.02579	0.000144036	hedgehog
FBgn0027795	CG14785	2.41648	1.16419e-14	1.1882	8.83464e-05	-
FBgn0030090	fend	0.924966	1.52671e-14	0.634931	6.04165e-08	forked end
FBgn0034013	unc-5	3.00985	1.85582e-14	1.49434	0.000110407	unc-5
FBgn0051998	CG31998	1.16117	1.92289e-14	0.701411	2.18234e-06	-
FBgn0037282	CG14657	0.970849	1.92338e-14	0.735953	2.37811e-09	-
FBgn0039283	danr	1.53915	1.98501e-14	1.46427	2.82653e-13	distal antenna-related
FBgn0014163	fax	0.999538	2.35233e-14	1.12497	3.29123e-19	failed axon connections
FBgn0039937	fd102C	1.66233	3.3143e-14	0.776937	0.000423936	forkhead domain 102C
FBgn0035101	p130CAS	2.31594	5.15823e-14	1.00769	0.000895473	p130CAS
FBgn0031258	CG4297	2.34426	5.26353e-14	1.18925	9.87386e-05	-
FBgn0010549	l(2)03659	2.05345	5.99933e-14	1.4532	1.51807e-07	lethal (2) 03659
FBgn0036686	CG7728	0.994908	6.81825e-14	0.795265	6.13122e-10	-
FBgn0287864	hbs	2.79728	7.81607e-14	1.24254	0.000731254	hibris
FBgn0032629	beat-IIIc	2.49074	7.81901e-14	1.10217	0.000776073	beaten path IIIc
FBgn0086711	mol	2.03462	8.95552e-14	1.86025	1.51144e-12	moladietz
FBgn0264075	tgo	0.635969	9.50358e-14	0.700349	2.86727e-17	tango
FBgn0266848	wap	0.911942	9.80698e-14	0.912325	9.47258e-15	wings apart
FBgn0000662	fl(2)d	0.820864	1.05227e-13	0.935122	1.22249e-18	female lethal d
FBgn0000014	abd-A	2.40317	1.13414e-13	1.185	0.000203353	abdominal A
FBgn0029864	CG15894	3.79245	1.41044e-13	1.70047	5.39612e-05	-
FBgn0286782	flz	3.79346	1.48764e-13	2.54053	7.35297e-08	filzig
FBgn0044028	Notum	2.22657	1.61226e-13	1.22233	3.73496e-05	Notum
FBgn0004959	phm	1.71574	1.67974e-13	0.877317	0.000161193	phantom
FBgn0264598	PsGEF	1.74189	1.84087e-13	1.11081	2.26443e-06	Protostome-specific GEF
FBgn0263219	Dscam4	2.70868	1.91516e-13	1.51773	1.21442e-05	Down syndrome cell adhesion molecule 4
FBgn0266452	CTPsyn	0.713621	2.08606e-13	0.740341	2.76524e-15	CTP synthase
FBgn0001218	Hsc70-3	1.01106	2.58763e-13	0.703228	1.61552e-07	Heat shock protein 70 cognate 3
FBgn0029996	UbcE2H	0.780352	2.58763e-13	0.87267	1.40437e-17	Ubiquitin conjugating enzyme E2H
FBgn0263986	cd	3.62831	3.12327e-13	1.72822	6.80841e-05	cardinal
FBgn0267665	lncRNA:CR46003	2.61599	3.54235e-13	1.23885	0.000374984	long non-coding RNA:CR46003
FBgn0038197	foxo	1.03529	3.6128e-13	0.767326	2.8368e-08	forkhead box
FBgn0036141	wls	1.61193	3.68528e-13	0.824307	0.000168859	wntless
FBgn0031169	CG1494	3.33707	3.83238e-13	1.59751	8.7733e-05	-
FBgn0016978	snRNP-U1-70K	0.95259	4.31463e-13	1.01313	1.17456e-15	small ribonucleoprotein particle U1 subunit 70K
FBgn0000157	Dll	1.67083	4.4673e-13	1.0659	4.33523e-06	Distal-less
FBgn0036732	Oatp74D	2.22128	4.90787e-13	1.14521	0.00014775	Organic anion transporting polypeptide 74D
FBgn0001301	kel	2.28489	7.55982e-13	1.07164	0.000716511	kelch
FBgn0053963	lncRNA:CR33963	1.77595	8.20273e-13	0.981041	6.95073e-05	long non-coding RNA:CR33963
FBgn0036789	AstC-R2	2.69569	8.5376e-13	1.75648	6.49091e-06	Allatostatin C receptor 2
FBgn0050440	CG30440	1.2173	1.07159e-12	0.888447	8.69128e-08	-
FBgn0000499	dsh	0.6135	1.14027e-12	0.620165	1.27983e-13	dishevelled
FBgn0002413	dco	0.833723	1.35248e-12	0.881791	5.47042e-15	discs overgrown
FBgn0033122	CG17002	1.0185	1.412e-12	1.46955	5.72382e-26	-
FBgn0053519	Unc-89	3.35192	1.42207e-12	1.56482	0.000319498	Unc-89
FBgn0020377	Sr-CII	2.06788	1.57053e-12	1.2761	8.51532e-06	Scavenger receptor class C
FBgn0051015	PH4Œ±PV	1.63046	1.67763e-12	0.799655	0.000585551	prolyl-4-hydroxylase-alpha PV
FBgn0030847	CG12991	1.33962	2.06198e-12	0.86359	6.60454e-06	-
FBgn0001189	hfw	1.28183	2.07852e-12	1.10066	5.39148e-10	halfway
FBgn0262160	CG9932	3.50782	2.08823e-12	1.75158	0.000278049	-
FBgn0031536	Cog3	1.22068	2.17783e-12	1.16592	3.6968e-12	Component of oligomeric golgi complex 3
FBgn0250816	AGO3	1.4266	2.37653e-12	1.8364	3.74295e-21	Argonaute 3
FBgn0041630	Hexo1	1.37433	2.46573e-12	0.885321	4.12683e-06	Hexosaminidase 1
FBgn0286051	Rexo5	0.89549	2.69335e-12	0.853021	5.71225e-12	RNA exonuclease 5
FBgn0286788	Orc1	0.955524	3.07568e-12	1.1626	7.82112e-19	Origin recognition complex subunit 1
FBgn0051550	CG31550	0.868899	3.18843e-12	0.686639	1.68703e-08	-
FBgn0261453	scaRNA:MeU2-C41	3.25628	3.40619e-12	2.98933	2.44252e-10	small Cajal body-specific RNA : MeU2-C41
FBgn0011224	heph	0.856285	4.42005e-12	0.919563	9.49091e-15	hephaestus
FBgn0000416	Sap-r	1.807	6.01815e-12	1.19909	2.80024e-06	Saposin-related
FBgn0036509	CG7739	1.20938	6.08994e-12	0.696702	5.93165e-05	-
FBgn0032051	CG13097	0.703451	6.39094e-12	0.843836	1.32055e-17	-
FBgn0278608	Dsp1	0.902221	6.42571e-12	1.07931	9.69314e-18	Dorsal switch protein 1
FBgn0014343	mirr	1.86945	7.04364e-12	1.12422	3.0127e-05	mirror
FBgn0028491	CG2930	1.68034	7.61535e-12	1.00998	3.65956e-05	-
FBgn0039928	Cals	1.72572	7.76971e-12	1.13766	3.79538e-06	Calsyntenin
FBgn0037792	TAF1B	0.793354	8.16938e-12	0.8347	1.29802e-13	TATA box-binding protein-associated factor RNA polymerase I subunit B
FBgn0003261	Rm62	1.0298	8.35177e-12	0.673425	4.65727e-06	Rm62
FBgn0052436	CG32436	2.76801	8.37517e-12	1.83815	3.12549e-06	-
FBgn0262124	uex	1.39091	1.02848e-11	0.803069	6.41001e-05	unextended
FBgn0014135	bnl	2.38808	1.0394e-11	1.14212	0.000962	branchless
FBgn0033113	Spn42Dc	2.67393	1.1003e-11	1.44704	0.000135035	Serpin 42Dc
FBgn0029761	SK	2.44856	1.13989e-11	1.3428	0.000134057	small conductance calcium-activated potassium channel
FBgn0030642	CG15642	1.96328	1.2708e-11	0.972825	0.000723047	-
FBgn0033108	CG15236	3.32321	1.42463e-11	1.68542	0.000142651	-
FBgn0003486	spo	1.81204	1.54528e-11	1.411	9.32729e-08	spook
FBgn0026319	Traf4	1.12628	1.6775e-11	1.00324	8.69061e-10	TNF-receptor-associated factor 4
FBgn0267457	asRNA:CR45807	3.69414	1.78568e-11	1.71308	0.000272415	antisense RNA:CR45807
FBgn0259242	CG42340	1.66975	2.05717e-11	1.28425	3.25994e-07	-
FBgn0037028	CG3618	1.25779	2.11319e-11	0.88309	1.47361e-06	-
FBgn0035497	CG14995	0.943264	2.58323e-11	1.2717	1.63124e-20	-
FBgn0031149	Stt3A	1.37928	2.70895e-11	1.00706	5.56953e-07	Catalytic subunit 3A of the oligosaccharyltransferase complex
FBgn0260400	elav	1.92174	2.8584e-11	1.11586	8.58159e-05	embryonic lethal abnormal vision
FBgn0034530	Rcd6	2.75647	3.31441e-11	1.54231	0.00012114	Reduction in Cnn dots 6
FBgn0037943	CG14722	0.604123	3.9113e-11	1.19388	5.8846e-41	-
FBgn0262734	eIF4H1	0.902882	4.06692e-11	0.901309	7.17306e-12	eukaryotic translation initiation factor 4H1
FBgn0031635	tank	0.881035	5.1547e-11	0.649431	7.55257e-07	tank
FBgn0000015	Abd-B	2.35986	5.22402e-11	1.18056	0.000901847	Abdominal B
FBgn0030870	CG6398	0.755516	5.3273e-11	0.625942	2.14454e-08	-
FBgn0051999	CG31999	1.58228	5.38315e-11	0.96278	5.44942e-05	-
FBgn0266409	CG45049	0.955233	5.56554e-11	0.699977	8.6654e-07	-
FBgn0001150	gt	1.30458	5.79548e-11	1.14211	7.21963e-09	giant
FBgn0035464	PIG-B	1.10487	5.96e-11	0.878863	7.8512e-08	Phosphatidylinositol glycan anchor biosynthesis class B
FBgn0032800	CG10137	1.80301	7.36097e-11	1.23156	1.21842e-05	-
FBgn0030941	wgn	2.2939	7.50545e-11	1.15951	0.000793978	wengen
FBgn0051159	mRRF2	1.00983	7.54444e-11	0.891527	5.6118e-09	mitochondrial ribosome recycling factor 2
FBgn0011260	Sema2a	2.44322	7.72125e-11	2.24476	5.33639e-10	Semaphorin 2a
FBgn0032156	CG13124	2.04393	7.9039e-11	1.17091	0.000186144	-
FBgn0034691	Synj	0.615949	7.91026e-11	0.594624	9.18981e-11	Synaptojanin
FBgn0034070	SP2353	4.33389	1.03006e-10	2.54173	6.47743e-05	SP2353
FBgn0026061	Mipp1	2.04765	1.24311e-10	1.49484	2.1417e-06	Multiple inositol polyphosphate phosphatase 1
FBgn0004396	CrebA	2.02081	1.69447e-10	1.34208	1.47936e-05	Cyclic-AMP response element binding protein A
FBgn0000659	fkh	1.44794	1.7599e-10	1.0861	1.19844e-06	fork head
FBgn0052677	X11LŒ≤	3.1965	1.82934e-10	1.79705	0.000230797	X11Lbeta
FBgn0030960	Atg101	0.800119	2.09734e-10	0.617014	6.28197e-07	Autophagy-related 101
FBgn0003997	hid	1.75827	2.1363e-10	1.06264	9.82653e-05	head involution defective
FBgn0038156	side-IV	3.13719	2.34886e-10	2.14061	8.56325e-06	sidestep IV
FBgn0053145	GalT1	0.957866	2.7399e-10	0.804138	4.76239e-08	beta1
FBgn0051140	CG31140	3.12742	3.31926e-10	1.6288	0.000738897	-
FBgn0038621	CG10864	2.27078	3.34641e-10	1.30377	0.000292597	-
FBgn0263980	Stacl	3.82954	3.49789e-10	1.80069	0.000328703	Stac-like
FBgn0041180	Tep4	1.58316	3.62654e-10	1.02754	3.50527e-05	Thioester-containing protein 4
FBgn0261545	CG42663	1.72659	3.64553e-10	1.05179	0.000109737	-
FBgn0036612	CG4998	2.14473	3.70279e-10	1.49744	7.70365e-06	-
FBgn0031042	CG14221	1.83201	5.1992e-10	1.04046	0.000445402	-
FBgn0001085	fz	1.41757	5.5486e-10	0.955888	1.85748e-05	frizzled
FBgn0261113	Xrp1	1.45477	6.03688e-10	0.843906	0.000362033	Xrp1
FBgn0015926	dah	0.609354	6.67827e-10	0.816035	6.60324e-18	discontinuous actin hexagon
FBgn0037838	TTLL15	1.82657	7.63278e-10	1.62153	1.90532e-08	Tubulin tyrosine ligase-like 15
FBgn0003716	tkv	1.33251	7.64334e-10	0.756785	0.000408987	thickveins
FBgn0261674	CG42709	1.07264	7.81302e-10	1.22226	4.89784e-13	-
FBgn0031762	CG9098	1.62939	8.01856e-10	1.21069	7.28116e-06	-
FBgn0052190	NUCB1	1.19923	8.77283e-10	0.783316	4.53653e-05	Nucleobindin 1
FBgn0027553	NELF-B	0.616306	9.21873e-10	0.603609	6.80601e-10	NELF-B
FBgn0082585	sprt	1.09683	9.58611e-10	1.06655	3.35757e-09	sprite
FBgn0031191	Cp110	0.873192	9.66796e-10	0.906825	5.28157e-11	Centriolar coiled coil protein 110kDa
FBgn0035094	CG9380	1.75778	1.03561e-09	1.66387	1.76452e-08	-
FBgn0025740	PlexB	2.23497	1.04281e-09	1.85144	1.72586e-07	Plexin B
FBgn0026197	lncRNA:noe	2.06307	1.11867e-09	1.64886	1.39471e-06	long non-coding RNA:noe
FBgn0022213	Cse1	0.689669	1.12878e-09	0.733103	1.4981e-11	Chromosome segregation 1
FBgn0035231	Pcyt2	1.86246	1.18067e-09	1.03073	0.000756852	Phosphocholine cytidylyltransferase 2
FBgn0034277	OstŒî	1.32721	1.19479e-09	1.18108	2.15331e-08	Oligosaccharide transferase Delta subunit
FBgn0041094	scyl	0.753172	1.1995e-09	0.709039	2.80937e-09	scylla
FBgn0032681	CG10283	1.16303	1.30463e-09	0.998725	2.91078e-07	-
FBgn0086671	snoRNA:Œ®28S-2876	1.90348	1.31213e-09	1.45515	3.06103e-06	snoRNA:Psi28S-2876
FBgn0052580	Muc14A	2.55923	1.46273e-09	1.70366	4.76916e-05	Mucin 14A
FBgn0041789	Pax	0.842385	1.55909e-09	0.804019	2.56505e-09	Paxillin
FBgn0040324	Ephrin	0.997278	1.67413e-09	0.707294	1.17655e-05	Ephrin
FBgn0025627	CG4194	1.8785	1.75675e-09	1.38001	1.03365e-05	-
FBgn0263396	sqd	0.684073	1.80396e-09	0.805343	1.29802e-13	squid
FBgn0031959	spz3	2.11936	1.96284e-09	1.36762	0.000110807	spatzle 3
FBgn0010415	Sdc	1.26446	2.23567e-09	1.12932	3.27457e-08	Syndecan
FBgn0260742	CG12213	2.38506	2.40638e-09	2.25501	4.87529e-09	-
FBgn0039249	CG11168	1.2137	2.58527e-09	0.775678	0.000129931	-
FBgn0011837	Tis11	0.641433	2.7487e-09	0.725006	2.48211e-12	Tis11 zinc finger protein
FBgn0030318	rho-4	1.16127	2.78697e-09	1.40566	9.78055e-14	rhomboid-4
FBgn0263397	Ih	2.76692	2.78697e-09	1.63943	0.000287412	I[[h]] channel
FBgn0037698	CG16779	2.98681	2.95039e-09	2.23201	7.45016e-06	-
FBgn0011576	Cyp4d2	1.93461	3.069e-09	1.47763	1.34671e-05	Cytochrome P450 4d2
FBgn0052758	Snx27	0.692008	3.1647e-09	0.620508	4.27479e-08	Sorting nexin 27
FBgn0052369	CG32369	2.92243	3.43482e-09	1.97991	4.2252e-05	-
FBgn0039113	udt	1.46803	3.47494e-09	0.963966	7.57883e-05	undicht
FBgn0263391	hts	0.69197	3.84217e-09	0.776948	5.24598e-12	hu li tai shao
FBgn0053978	CG33978	2.26153	3.89657e-09	1.77141	3.58828e-06	-
FBgn0034985	CG3328	3.62804	4.35586e-09	2.10971	0.000243295	-
FBgn0001311	kkv	2.96542	5.88228e-09	2.0335	4.52108e-05	krotzkopf verkehrt
FBgn0010651	MFS14	1.61529	6.27147e-09	1.20253	1.27681e-05	Major Facilitator Superfamily Transporter 14
FBgn0033453	Sting	0.958274	6.60368e-09	0.75121	3.1203e-06	Sting
FBgn0265184	CG44249	1.12886	8.02996e-09	0.684202	0.000639029	-
FBgn0005558	ey	1.51046	8.14039e-09	1.15954	9.79269e-06	eyeless
FBgn0037657	hyx	0.784589	8.98295e-09	0.964945	1.93944e-13	hyrax
FBgn0003448	sna	1.0751	1.00213e-08	1.38415	1.0708e-13	snail
FBgn0032129	jp	3.16958	1.21302e-08	2.09263	0.000110077	junctophilin
FBgn0034982	Naa35	0.711666	1.27303e-08	0.847997	2.11742e-12	N(alpha)-acetyltransferase 35
FBgn0035121	Tudor-SN	0.953898	1.34185e-08	0.767342	2.44241e-06	Tudor staphylococcal nuclease
FBgn0266719	stac	1.12902	1.44853e-08	1.1561	2.02756e-09	staccato
FBgn0082931	snoRNA:Me28S-G2703a	2.95027	1.45096e-08	1.87139	0.000256015	snoRNA:Me28S-G2703a
FBgn0033121	Cyp6u1	0.742965	1.47083e-08	0.602146	2.63153e-06	Cytochrome P450 6u1
FBgn0030109	CG12121	1.33819	1.66313e-08	1.00204	1.44889e-05	-
FBgn0012037	Ance	1.6509	1.90952e-08	1.00715	0.000542331	Angiotensin converting enzyme
FBgn0003513	ss	3.02208	2.13347e-08	1.92863	0.000218611	spineless
FBgn0261822	Bsg	1.3942	2.34296e-08	1.26811	1.42943e-07	Basigin
FBgn0039282	Bili	2.2152	2.40066e-08	1.43384	0.000319498	Band4.1 inhibitor LRP interactor
FBgn0033061	SmydA-5	2.19644	2.6721e-08	1.32047	0.000811835	SET and MYND domain containing
FBgn0035023	ITP	1.58249	2.69705e-08	1.26117	2.13491e-05	Ion transport peptide
FBgn0000489	Pka-C3	1.26333	2.7328e-08	1.05505	3.56782e-06	Protein kinase
FBgn0039261	Ythdf	0.645095	2.73743e-08	0.830052	8.35283e-14	YTH N6-methyladenosine RNA binding protein
FBgn0085421	Epac	1.55094	3.98523e-08	0.937594	0.000948802	Exchange protein directly activated by cAMP
FBgn0036544	sff	2.64838	4.07128e-08	1.7105	0.000325314	sugar-free frosting
FBgn0039944	CG17162	0.82348	4.31347e-08	1.16082	1.70226e-14	-
FBgn0264273	Sema2b	3.91379	4.44731e-08	2.25744	0.000531269	Semaphorin 2b
FBgn0051619	nolo	1.58302	4.66869e-08	1.34269	2.70482e-06	no long nerve cord
FBgn0285913	red	0.703142	4.71144e-08	0.748562	1.61056e-09	red Malpighian tubules
FBgn0039914	mav	0.738321	5.32209e-08	0.853692	6.91473e-11	maverick
FBgn0004882	orb	0.638032	5.72652e-08	0.7026	4.57113e-10	oo18 RNA-binding protein
FBgn0266304	asRNA:CR44969	3.2709	5.90636e-08	2.42786	4.20154e-05	antisense RNA:CR44969
FBgn0033051	Strica	0.706314	6.05195e-08	0.704872	9.11711e-08	Ser/Thr-rich caspase
FBgn0015024	CkIŒ±	0.680562	6.66463e-08	0.658413	5.8557e-08	Casein kinase Ialpha
FBgn0002931	net	1.17052	6.71902e-08	0.973465	7.72489e-06	net
FBgn0085390	Dgk	3.13508	6.79957e-08	2.64976	1.30764e-05	Diacyl glycerol kinase
FBgn0000492	Dr	1.74971	7.37584e-08	1.74183	8.61255e-08	Drop
FBgn0266958	lncRNA:CR45409	0.922472	8.34787e-08	0.76975	5.30483e-06	long non-coding RNA:CR45409
FBgn0285925	Fas1	1.12293	8.63892e-08	0.830781	5.00154e-05	Fasciclin 1
FBgn0039075	CG4393	3.16449	9.37003e-08	1.96576	0.000630334	-
FBgn0035622	TM9SF3	1.40803	9.73138e-08	1.08167	2.68417e-05	Transmembrane 9 superfamily protein member 3
FBgn0261703	gce	1.31591	9.86012e-08	0.882944	0.000432321	germ cell-expressed bHLH-PAS
FBgn0037143	CR7448	1.70101	1.10763e-07	1.40068	3.53758e-05	-
FBgn0086408	stl	3.23212	1.36196e-07	3.23405	2.52892e-06	stall
FBgn0002022	Catsup	1.15755	1.40987e-07	0.828064	0.000121455	Catecholamines up
FBgn0264001	bru3	1.65232	1.583e-07	1.16615	0.000200716	bruno 3
FBgn0032682	grnd	1.10754	1.80503e-07	0.848872	0.000101809	grindelwald
FBgn0032252	loh	2.56854	2.07516e-07	2.3269	1.80672e-05	lonely heart
FBgn0033247	Nup44A	1.16793	2.11817e-07	1.78563	9.87415e-17	Nucleoporin at 44A
FBgn0035676	ssp6	2.36725	2.22889e-07	2.17255	3.78232e-06	short spindle 6
FBgn0036039	Naa60	0.760542	3.02654e-07	0.682649	2.3961e-06	N(alpha)-acetyltransferase 60
FBgn0011642	Zyx	0.707116	3.17913e-07	0.709061	1.23357e-07	Zyxin
FBgn0260793	2mit	3.77248	3.19345e-07	2.59606	0.000267728	2mit
FBgn0028369	kirre	1.36968	3.82931e-07	0.917862	0.000654075	kin of irre
FBgn0023541	Cyp4d14	2.6329	4.65159e-07	2.15811	5.2389e-05	Cytochrome P450 4d14
FBgn0011824	CG4038	0.707465	5.42669e-07	1.04407	2.34289e-14	-
FBgn0260440	spdo	3.08594	5.63856e-07	2.18666	0.000300097	sanpodo
FBgn0003317	sax	1.06573	5.95953e-07	0.973591	2.41652e-06	saxophone
FBgn0284243	Œ≤Tub56D	0.811727	6.9046e-07	1.12674	4.29661e-13	beta-Tubulin at 56D
FBgn0020912	Ptx1	2.29294	7.05887e-07	1.57534	0.000651169	Ptx1
FBgn0005612	Sox14	1.31857	7.77551e-07	0.89376	0.000957375	Sox box protein 14
FBgn0040273	Spt5	0.889369	8.70871e-07	1.27187	1.47989e-13	Spt5
FBgn0015400	kek2	2.98699	9.47119e-07	2.19682	0.000282579	kekkon 2
FBgn0036396	CG17359	0.625328	1.0056e-06	0.901097	3.32742e-13	-
FBgn0024234	gbb	1.69315	1.03683e-06	1.41105	3.78893e-05	glass bottom boat
FBgn0263258	chas	0.948402	1.1153e-06	0.827222	1.30377e-05	chascon
FBgn0052373	CG32373	1.09938	1.17994e-06	1.01863	8.14212e-06	-
FBgn0261385	scra	1.64588	1.21416e-06	1.37245	3.08357e-05	scraps
FBgn0045842	yuri	0.743633	1.33797e-06	0.721487	6.15726e-06	yuri gagarin
FBgn0008636	hbn	1.14427	1.34203e-06	0.846786	0.000759932	homeobrain
FBgn0265998	Doa	0.763171	1.48728e-06	0.93065	8.44672e-10	Darkener of apricot
FBgn0265058	asRNA:CR44169	2.4246	1.58646e-06	1.86856	0.000357388	antisense RNA:CR44169
FBgn0051523	CG31523	0.880213	1.6192e-06	0.814162	4.72883e-06	-
FBgn0033609	Fbl6	0.67548	1.73866e-06	0.593157	1.59723e-05	F-box and leucine-rich repeat protein 6
FBgn0020617	Rx	2.37793	1.79904e-06	1.84197	0.000282869	Retinal Homeobox
FBgn0259878	Fs	2.30107	1.95151e-06	1.92208	0.000163467	Follistatin
FBgn0032398	CG6766	1.31312	2.0035e-06	1.31725	7.96053e-07	-
FBgn0032593	TrpŒ≥	2.31748	2.11331e-06	1.70131	0.000571077	Transient receptor potential cation channel gamma
FBgn0036522	Phs	0.835272	2.12908e-06	0.945853	2.12879e-08	Phaser
FBgn0053147	Hs3st-A	3.12532	2.47404e-06	2.48737	0.000251687	Heparan sulfate 3-O sulfotransferase-A
FBgn0014870	Psi	0.718715	2.79045e-06	0.645008	1.52905e-05	P-element somatic inhibitor
FBgn0285944	para	3.21483	2.89725e-06	2.22324	0.000957478	paralytic
FBgn0023507	D2hgdh	0.689637	3.16381e-06	0.747894	4.50538e-07	D-2-hydroxyglutaric acid dehydrogenase
FBgn0266410	CG45050	0.597404	3.34768e-06	0.770606	3.22258e-10	-
FBgn0028695	Rpn1	0.585893	3.36357e-06	0.624413	2.58083e-07	Regulatory particle non-ATPase 1
FBgn0036710	CG6479	1.67029	4.29474e-06	1.76979	4.07626e-07	-
FBgn0033814	Qsox1	0.898791	4.93031e-06	1.02256	6.97935e-08	Quiescin sulfhydryl oxidase 1
FBgn0031725	DIP-Œ∑	3.03518	5.26773e-06	2.36147	0.000664068	Dpr-interacting protein eta
FBgn0010397	LamC	0.697607	5.74172e-06	0.703938	3.4541e-06	Lamin C
FBgn0265356	tn	2.72023	5.90716e-06	2.63811	1.72336e-05	thin
FBgn0263846	CG43707	3.23408	5.97953e-06	2.54964	0.000549095	-
FBgn0261454	scaRNA:MeU4-A65	3.07938	7.491e-06	4.39595	7.22421e-06	small Cajal body-specific RNA : MeU4-A65
FBgn0039419	CG12290	1.29697	7.80663e-06	1.08701	0.000158228	-
FBgn0029091	Chs2	3.17337	8.30647e-06	2.3302	0.000925415	Chitin synthase 2
FBgn0035523	Ctl1	1.23876	8.96759e-06	1.45993	5.6724e-08	Choline transporter-like 1
FBgn0031285	CG3662	1.62467	1.01772e-05	1.88628	9.39429e-08	-
FBgn0036579	Tmx3	1.07632	1.12188e-05	1.00624	2.42337e-05	Thioredoxin-related transmembrane protein 3
FBgn0261555	CG42673	3.05833	1.3631e-05	2.69541	0.000123896	-
FBgn0004893	bowl	1.33178	1.41017e-05	1.08451	0.000333514	brother of odd with entrails limited
FBgn0035099	CG6845	1.43023	1.6557e-05	1.21885	0.000380292	-
FBgn0263006	SERCA	1.04621	1.9877e-05	0.889856	0.000192879	Sarco/endoplasmic reticulum Ca(2+)-ATPase
FBgn0038566	bard	0.941091	2.14446e-05	1.07522	4.46937e-07	bard
FBgn0034408	sano	1.60499	2.54555e-05	1.37491	0.000309372	serrano
FBgn0033659	Damm	2.77366	2.75781e-05	2.6586	0.000207122	Death associated molecule related to Mch2 caspase
FBgn0035798	frac	2.77346	3.16392e-05	2.37202	0.000779896	faulty attraction
FBgn0013263	Trl	0.833643	3.57935e-05	0.752083	0.000148589	Trithorax-like
FBgn0263047	CG43342	0.775728	3.59411e-05	0.923738	7.1368e-07	-
FBgn0037743	Alg12	1.03884	4.28789e-05	0.923336	0.000217049	Alg12 alpha-1
FBgn0000625	eyg	2.25286	6.02305e-05	2.04807	0.000356197	eyegone
FBgn0260462	CtsF	1.42744	6.06418e-05	1.33688	0.000106956	Cathepsin F
FBgn0052521	Mnr	0.720927	6.07431e-05	0.877865	3.96307e-07	Membrane-bound Notch regulator
FBgn0039073	CG4408	1.17502	6.46103e-05	1.62574	8.54378e-09	-
FBgn0031488	Ccdc85	1.06845	7.40388e-05	1.27093	2.19502e-06	-
FBgn0028490	CG31705	1.36867	0.000107052	2.35442	4.47313e-12	-
FBgn0002709	mei-218	1.27782	0.000109	1.19991	0.000321857	meiotic 218
FBgn0288229	CG3164	0.97619	0.000115639	1.12422	3.83836e-06	-
FBgn0033919	CG8547	1.04392	0.000124695	0.95216	0.000978564	-
FBgn0004394	pdm2	0.740298	0.000174078	0.866075	9.31562e-06	POU domain protein 2
FBgn0031745	rau	0.95518	0.000192974	1.18522	8.75256e-06	rau
FBgn0039920	CG11360	0.855615	0.000197167	1.03828	2.43104e-06	-
FBgn0027581	CG6191	0.813775	0.000239413	1.06934	1.08792e-06	-
FBgn0266262	lncRNA:CR44957	3.172	0.000254645	3.27079	0.000764652	long non-coding RNA:CR44957
FBgn0004575	Syn	2.27001	0.000378821	2.36089	0.000448299	Synapsin
FBgn0050344	CG30344	0.637581	0.000583858	0.748161	3.40049e-05	-
FBgn0065051	scaRNA:MeU5-U42	2.01852	0.000658085	2.77129	4.73823e-05	small Cajal body-specific RNA : MeU5-U42

## Sheet: Common with Wispy
Common targets between Dcr-2 IP vs Input, Dcr-2 IP vs IgG and Wispy targets from at least one study (Cui et al. 2013, Lim et al. 2016 and Eichhorn et al. 2016)
Adjusted p-value < 0,001 and log2 Fold Change > 0,584962
FlyBase ID	Gene name	Description
FBgn0000017	Abl	Abl tyrosine kinase
FBgn0000052	Pfas	Phosphoribosylformylglycinamidine synthase
FBgn0000097	aop	anterior open
FBgn0000119	arr	arrow
FBgn0000140	asp	abnormal spindle
FBgn0000163	baz	bazooka
FBgn0000183	BicD	Bicaudal D
FBgn0000247	ca	claret
FBgn0000307	chif	chiffon
FBgn0000317	ck	crinkled
FBgn0000382	csw	corkscrew
FBgn0000404	CycA	Cyclin A
FBgn0000405	CycB	Cyclin B
FBgn0000414	Dab	Disabled
FBgn0000463	Dl	Delta
FBgn0000479	dnc	dunce
FBgn0000499	dsh	dishevelled
FBgn0000524	dx	deltex
FBgn0000541	E(bx)	Enhancer of bithorax
FBgn0000546	EcR	Ecdysone receptor
FBgn0000547	ed	echinoid
FBgn0000562	egl	egalitarian
FBgn0000578	ena	enabled
FBgn0000629	E(z)	Enhancer of zeste
FBgn0000719	fog	folded gastrulation
FBgn0001078	ftz-f1	ftz transcription factor 1
FBgn0001079	fu	fused
FBgn0001085	fz	frizzled
FBgn0001122	Galphao	G protein alpha o subunit
FBgn0001139	gro	groucho
FBgn0001169	H	Hairless
FBgn0001180	hb	hunchback
FBgn0001206	Hmr	Hybrid male rescue
FBgn0001218	Hsc70-3	Heat shock protein 70 cognate 3
FBgn0001235	hth	homothorax
FBgn0001301	kel	kelch
FBgn0001316	klar	klarsicht
FBgn0001330	kz	kurz
FBgn0001341	Mybbp1A	MYB binding protein 1a
FBgn0001404	egh	egghead
FBgn0001624	dlg1	discs large 1
FBgn0001965	Sos	Son of sevenless
FBgn0001986	Mtr4	Mtr4 helicase
FBgn0002121	l(2)gl	lethal (2) giant larvae
FBgn0002306	sas	stranded at second
FBgn0002413	dco	discs overgrown
FBgn0002431	hyd	hyperplastic discs
FBgn0002441	l(3)mbt	lethal (3) malignant brain tumor
FBgn0002543	robo2	roundabout 2
FBgn0002643	mam	mastermind
FBgn0002645	Map205	Microtubule-associated protein 205
FBgn0002673	twe	twine
FBgn0002723	Met	Methoprene-tolerant
FBgn0002783	mor	moira
FBgn0002891	PolZ1	DNA polymerase zeta subunit 1
FBgn0002899	mus301	mutagen-sensitive 301
FBgn0002905	PolQ	DNA polymerase theta
FBgn0002906	Blm	Bloom syndrome helicase
FBgn0002932	neur	neuralized
FBgn0002973	numb	numb
FBgn0002989	okr	okra
FBgn0003016	osp	outspread
FBgn0003028	ovo	ovo
FBgn0003041	pbl	pebble
FBgn0003048	pcx	pecanex
FBgn0003079	Raf	Raf oncogene
FBgn0003093	Pkc98E	Protein C kinase 98E
FBgn0003165	pum	pumilio
FBgn0003175	px	plexus
FBgn0003268	rod	rough deal
FBgn0003277	Polr2A	RNA polymerase II subunit A
FBgn0003292	rt	rotated abdomen
FBgn0003317	sax	saxophone
FBgn0003321	sbr	small bristles
FBgn0003326	sca	scabrous
FBgn0003391	shg	shotgun
FBgn0003396	shn	schnurri
FBgn0003415	skd	skuld
FBgn0003416	sl	small wing
FBgn0003459	stwl	stonewall
FBgn0003483	spn-E	spindle E
FBgn0003520	stau	staufen
FBgn0003525	stg	string
FBgn0003557	Su(dx)	Suppressor of deltex
FBgn0003598	Su(var)3-7	Suppressor of variegation 3-7
FBgn0003656	sws	swiss cheese
FBgn0003716	tkv	thickveins
FBgn0003733	tor	torso
FBgn0003862	trx	trithorax
FBgn0003891	tud	tudor
FBgn0004108	Nrt	Neurotactin
FBgn0004368	Ptp4E	Protein tyrosine phosphatase 4E
FBgn0004370	Ptp10D	Protein tyrosine phosphatase 10D
FBgn0004373	fwd	four wheel drive
FBgn0004390	RasGAP1	Ras GTPase activating protein 1
FBgn0004391	shtd	shattered
FBgn0004406	PolG1	DNA polymerase gamma subunit 1
FBgn0004463	Polr3B	RNA polymerase III subunit B
FBgn0004598	Fur2	Furin 2
FBgn0004611	Plc21C	Phospholipase C at 21C
FBgn0004647	N	Notch
FBgn0004648	svr	silver
FBgn0004655	wapl	wings apart-like
FBgn0004656	fs(1)h	female sterile (1) homeotic
FBgn0004657	mys	myospheroid
FBgn0004698	Xpc	Xeroderma pigmentosum, complementation group C
FBgn0004795	retn	retained
FBgn0004837	Su(H)	Suppressor of Hairless
FBgn0004860	ph-d	polyhomeotic distal
FBgn0004864	hop	hopscotch
FBgn0004876	cdi	center divider
FBgn0004957	por	porcupine
FBgn0005198	gig	gigas
FBgn0005386	ash1	absent, small, or homeotic discs 1
FBgn0005596	yem	yemanuclein
FBgn0005624	Psc	Posterior sex combs
FBgn0005632	faf	fat facets
FBgn0005642	wdn	wings down
FBgn0005674	GluProRS	Glutamyl-prolyl-tRNA synthetase
FBgn0010113	hdc	headcase
FBgn0010194	Wnt5	Wnt oncogene analog 5
FBgn0010280	Taf4	TBP-associated factor 4
FBgn0010303	hep	hemipterous
FBgn0010313	corto	corto
FBgn0010328	woc	without children
FBgn0010355	Taf1	TBP-associated factor 1
FBgn0010382	CycE	Cyclin E
FBgn0010473	tutl	turtle
FBgn0010488	NAT1	NAT1
FBgn0010583	dock	dreadlocks
FBgn0010660	Nup214	Nucleoporin 214kD
FBgn0010825	Gug	Grunge
FBgn0010905	Spn	Spinophilin
FBgn0010909	msn	misshapen
FBgn0010926	l(3)07882	lethal (3) 07882
FBgn0011202	dia	diaphanous
FBgn0011224	heph	hephaestus
FBgn0011259	Sema1a	Semaphorin 1a
FBgn0011260	Sema2a	Semaphorin 2a
FBgn0011336	Stt3B	Catalytic subunit 3B of the oligosaccharyltransferase complex
FBgn0011474	Set8	SET domain containing 8
FBgn0011481	Ssdp	Sequence-specific single-stranded DNA-binding protein
FBgn0011592	fra	frazzled
FBgn0011642	Zyx	Zyxin
FBgn0011655	Med	Medea
FBgn0011692	pav	pavarotti
FBgn0011710	Septin1	Septin 1
FBgn0011725	twin	twin
FBgn0011737	Wee1	Wee1 kinase
FBgn0011740	alpha-Man-IIa	alpha-Mannosidase class II a
FBgn0011747	Ank	Ankyrin
FBgn0011785	BRWD3	BRWD3
FBgn0011817	nmo	nemo
FBgn0011824	CG4038	-
FBgn0011837	Tis11	Tis11 zinc finger protein
FBgn0013263	Trl	Trithorax-like
FBgn0013343	Syx1A	Syntaxin 1A
FBgn0013576	mtd	mustard
FBgn0013726	pnut	peanut
FBgn0013732	sced	scrambled
FBgn0013759	CASK	CASK
FBgn0013765	cnn	centrosomin
FBgn0013799	Deaf1	Deformed epidermal autoregulatory factor-1
FBgn0013810	Dhc36C	Dynein heavy chain at 36C
FBgn0013813	Dhc98D	Dynein heavy chain at 89D
FBgn0013987	MAPk-Ak2	MAP kinase activated protein-kinase-2
FBgn0013995	Calx	Na/Ca-exchange protein
FBgn0013997	Nrx-IV	Neurexin IV
FBgn0014006	Ask1	Apoptotic signal-regulating kinase 1
FBgn0014007	Ptp69D	Protein tyrosine phosphatase 69D
FBgn0014037	Su(Tpl)	Suppressor of Triplolethal
FBgn0014133	bif	bifocal
FBgn0014141	cher	cheerio
FBgn0014163	fax	failed axon connections
FBgn0014870	Psi	P-element somatic inhibitor
FBgn0015024	CkIalpha	Casein kinase Ialpha
FBgn0015269	Nf1	Neurofibromin 1
FBgn0015278	Pi3K68D	Phosphatidylinositol 3-kinase 68D
FBgn0015279	Pi3K92E	Phosphatidylinositol 3-kinase 92E
FBgn0015360	oxt	peptide O-xylosyltransferase
FBgn0015371	chn	charlatan
FBgn0015396	jumu	jumeau
FBgn0015477	Rme-8	Receptor mediated endocytosis 8
FBgn0015509	Cul1	Cullin 1
FBgn0015513	mbc	myoblast city
FBgn0015600	toc	toucan
FBgn0015615	SMC3	Structural maintenance of chromosomes 3
FBgn0015623	Cpr	Cytochrome P450 reductase
FBgn0015625	CycB3	Cyclin B3
FBgn0015664	Dref	DNA replication-related element factor
FBgn0015799	Rbf	Retinoblastoma-family protein
FBgn0015838	Vang	Van Gogh
FBgn0015903	apt	apontic
FBgn0015926	dah	discontinuous actin hexagon
FBgn0015949	hrg	hiiragi
FBgn0016070	smg	smaug
FBgn0016081	fry	furry
FBgn0016641	PTP-ER	Protein tyrosine phosphatase-ERK/Enhancer of Ras1
FBgn0016754	sba	six-banded
FBgn0016756	Usp47	Ubiquitin specific protease 47
FBgn0016794	dos	daughter of sevenless
FBgn0016797	fz2	frizzled 2
FBgn0016917	Stat92E	Signal-transducer and activator of transcription protein at 92E
FBgn0016977	spen	split ends
FBgn0016978	snRNP-U1-70K	small ribonucleoprotein particle U1 subunit 70K
FBgn0017558	Pdk	Pyruvate dehydrogenase kinase
FBgn0017581	Lk6	Lk6 kinase
FBgn0019686	lok	loki
FBgn0019890	Smg5	Smg5 nonsense mediated mRNA decay factor
FBgn0019968	Khc-73	Kinesin heavy chain 73
FBgn0020236	ATPCL	ATP citrate lyase
FBgn0020261	pcm	pacman
FBgn0020278	loco	locomotion defects
FBgn0020279	lig	lingerer
FBgn0020306	dom	domino
FBgn0020312	Tmtc3	Transmembrane O-mannosyltransferase targeting cadherins 3
FBgn0020379	Rfx	Rfx
FBgn0020386	Pdk1	Phosphoinositide-dependent kinase 1
FBgn0020407	asun	asunder
FBgn0020412	JIL-1	JIL-1 kinase
FBgn0020496	CtBP	C-terminal Binding Protein
FBgn0020497	emb	embargoed
FBgn0020510	Abi	Abelson interacting protein
FBgn0020620	RN-tre	Related to the N terminus of tre oncogene
FBgn0020621	Pkn	Protein kinase N
FBgn0020626	Osbp	Oxysterol binding protein
FBgn0020633	Mcm7	Minichromosome maintenance 7
FBgn0020647	KrT95D	Krueppel target at 95D
FBgn0021760	chb	chromosome bows
FBgn0021761	Nup154	Nucleoporin 154kD
FBgn0021764	sdk	sidekick
FBgn0021796	Tor	Target of rapamycin
FBgn0021800	Reph	Regulator of eph expression
FBgn0022153	l(2)k05819	lethal (2) k05819
FBgn0022764	Sin3A	Sin3A
FBgn0022768	Pp2C1	Protein phosphatase 2C
FBgn0023130	a6	a6
FBgn0023172	RhoGEF2	Rho guanine nucleotide exchange factor 2
FBgn0023407	B4	B4
FBgn0023441	fus	fusilli
FBgn0023458	Rbcn-3A	Rabconnectin-3A
FBgn0023508	Ocrl	Oculocerebrorenal syndrome of Lowe
FBgn0023510	Rbcn-3B	Rabconnectin-3B
FBgn0023511	Edem1	ER degradation enhancer, mannosidase alpha-like 1
FBgn0023512	eIF2Bepsilon	eukaryotic translation initiation factor 2B subunit epsilon
FBgn0023515	Gcna	Germ cell nuclear acidic peptidase
FBgn0023518	trr	trithorax-related
FBgn0023528	CG2924	-
FBgn0023531	CG32809	-
FBgn0024187	syd	sunday driver
FBgn0024245	dnt	doughnut on 2
FBgn0024248	chico	chico
FBgn0024291	Sirt1	Sirtuin 1
FBgn0024329	Mekk1	Mekk1
FBgn0024510	dlt	discs lost
FBgn0024555	flfl	falafel
FBgn0024806	DIP2	DISCO Interacting Protein 2
FBgn0024921	Tnpo	Transportin
FBgn0024947	NTPase	NTPase
FBgn0024987	ssx	sister-of-Sex-lethal
FBgn0024991	CG2694	-
FBgn0025373	Fpps	Farnesyl pyrophosphate synthase
FBgn0025574	Pli	Pellino
FBgn0025626	CG4281	-
FBgn0025633	spdi	split discs
FBgn0025641	DAAM	Dishevelled Associated Activator of Morphogenesis
FBgn0025681	CG3558	-
FBgn0025684	MFS18	Major Facilitator Superfamily Transporter 18
FBgn0025724	beta'COP	Coat Protein (coatomer) beta'
FBgn0025740	PlexB	Plexin B
FBgn0025743	mbt	mushroom bodies tiny
FBgn0025802	Sbf	SET domain binding factor
FBgn0025815	Mcm6	Minichromosome maintenance 6
FBgn0025864	Crag	Calmodulin-binding protein related to a Rab3 GDP/GTP exchange protein
FBgn0025866	CalpB	Calpain-B
FBgn0025936	Eph	Eph receptor tyrosine kinase
FBgn0026015	Top3beta	Topoisomerase 3beta
FBgn0026059	Mhcl	Myosin heavy chain-like
FBgn0026060	Mipp2	Multiple inositol polyphosphate phosphatase 2
FBgn0026083	tyf	twenty-four
FBgn0026160	tna	tonalli
FBgn0026179	siz	schizo
FBgn0026181	Rok	Rho kinase
FBgn0026189	promL	prominin-like
FBgn0026197	lncRNA:noe	long non-coding RNA:noe
FBgn0026239	gukh	GUK-holder
FBgn0026262	Taf3	TBP-associated factor 3
FBgn0026313	X11L	X11L
FBgn0026323	Tak1	TGF-beta activated kinase 1
FBgn0026369	Sara	Smad anchor for receptor activation
FBgn0026375	RhoGAPp190	Rho GTPase activating protein p190
FBgn0026376	Rgl	Ral guanine nucleotide dissociation stimulator-like
FBgn0026401	Nipped-B	Nipped-B
FBgn0026427	Su(var)2-HP2	Su(var)2-HP2
FBgn0026432	Grip163	Grip163
FBgn0026575	hang	hangover
FBgn0026577	CG8677	-
FBgn0026597	Axn	Axin
FBgn0026598	Apc2	Adenomatous polyposis coli 2
FBgn0026616	alpha-Man-IIb	alpha-Mannosidase class II b
FBgn0026620	tacc	transforming acidic coiled-coil protein
FBgn0026713	Prp16	pre-mRNA processing factor 16
FBgn0026869	Tdg	Thymine DNA glycosylase
FBgn0027079	ValRS	Valyl-tRNA synthetase
FBgn0027108	Inx2	Innexin 2
FBgn0027279	l(1)G0196	lethal (1) G0196
FBgn0027335	Rip11	Rab11 interacting protein
FBgn0027503	CG11970	-
FBgn0027505	Rab3-GAP	Rab3 GTPase activating protein
FBgn0027506	EDTP	Egg-derived tyrosine phosphatase
FBgn0027508	Tnks	tankyrase
FBgn0027528	goe	gone early
FBgn0027532	CG7139	-
FBgn0027539	lili	lilipod
FBgn0027548	nito	spenito
FBgn0027553	NELF-B	NELF-B
FBgn0027579	mino	minotaur
FBgn0027581	CG6191	-
FBgn0027582	CG6230	-
FBgn0027594	drpr	draper
FBgn0027601	pdgy	pudgy
FBgn0027602	CG8611	-
FBgn0027620	Acf	ATP-dependent chromatin assembly factor large subunit
FBgn0027660	blot	bloated tubules
FBgn0027835	Dp1	Dodeca-satellite-binding protein 1
FBgn0027948	msps	mini spindles
FBgn0027951	MTA1-like	Metastasis associated 1-like
FBgn0028331	l(1)G0289	lethal (1) G0289
FBgn0028341	Ptpmeg2	Protein tyrosine phosphatase Meg2
FBgn0028476	Usp1	Ubiquitin specific protease 1
FBgn0028487	f-cup	flyers-cup
FBgn0028490	CG31705	-
FBgn0028499	CG7985	-
FBgn0028509	CenG1A	Centaurin gamma 1A
FBgn0028538	Sec71	Secretory 71
FBgn0028539	Eato	Engulfment ABC Transporter in the ovary
FBgn0028579	phtf	phtf
FBgn0029006	Smurf	SMAD specific E3 ubiquitin protein ligase
FBgn0029067	Dd	Dullard
FBgn0029088	disp	dispatched
FBgn0029114	Tollo	Tollo
FBgn0029123	SoxN	SoxNeuro
FBgn0029157	ssh	slingshot
FBgn0029504	CHES-1-like	Checkpoint suppressor 1-like
FBgn0029525	CG18273	-
FBgn0029685	CG2938	-
FBgn0029688	lva	lava lamp
FBgn0029693	Cmtr1	Cap methyltransferase 1
FBgn0029706	CG3626	-
FBgn0029763	Usp16-45	Ubiquitin specific protease 16/45
FBgn0029840	raptor	raptor
FBgn0029870	Marf	Mitochondrial assembly regulatory factor
FBgn0029873	CG3918	-
FBgn0029874	CG3342	-
FBgn0029881	pigs	pickled eggs
FBgn0029887	CG3198	-
FBgn0029891	Pink1	PTEN-induced putative kinase 1
FBgn0029893	CG14442	-
FBgn0029903	pod1	pod1 coronin
FBgn0029912	CG4557	-
FBgn0029944	Dok	Downstream of kinase
FBgn0029992	Upf2	Upf2
FBgn0029996	UbcE2H	Ubiquitin conjugating enzyme E2H
FBgn0029997	CG2258	-
FBgn0030017	CG2278	-
FBgn0030018	slpr	slipper
FBgn0030087	CG7766	-
FBgn0030091	CG7065	-
FBgn0030109	CG12121	-
FBgn0030114	CG17754	-
FBgn0030240	CG2202	-
FBgn0030243	CG2186	-
FBgn0030246	CG1582	-
FBgn0030268	Klp10A	Kinesin-like protein at 10A
FBgn0030286	Gapvd1	GTPase activating protein and VPS9 domains 1
FBgn0030293	CG1737	-
FBgn0030301	HP5	Heterochromatin protein 5
FBgn0030318	rho-4	rhomboid-4
FBgn0030336	CG1578	-
FBgn0030343	ATP7	ATP7
FBgn0030344	Nrd1	Nardilysin
FBgn0030354	Upf1	Upf1 RNA helicase
FBgn0030365	Tango4	Transport and Golgi organization 4
FBgn0030466	CG15744	-
FBgn0030486	Set2	SET domain containing 2
FBgn0030502	tth	toothrin
FBgn0030504	CG2691	-
FBgn0030512	Nadsyn	NAD synthetase
FBgn0030625	CG5877	-
FBgn0030631	Prp5	pre-mRNA processing factor 5
FBgn0030660	CG8097	-
FBgn0030674	HUWE1	HECT, UBA and WWE domain containing E3 ubiquitin protein ligase 1
FBgn0030685	Graf	GTPase regulator associated with FAK
FBgn0030701	CG16952	-
FBgn0030766	mthl1	methuselah-like 1
FBgn0030808	RhoGAP15B	Rho GTPase activating protein at 15B
FBgn0030809	Ubr1	Ubr1 ubiquitin ligase
FBgn0030812	wcy	wacky
FBgn0030869	Socs16D	Suppressor of Cytokine Signaling at 16D
FBgn0030870	CG6398	-
FBgn0030930	Pgant7	Polypeptide N-Acetylgalactosaminyltransferase 7
FBgn0030946	CG6659	-
FBgn0030960	Atg101	Autophagy-related 101
FBgn0030974	Flacc	Fl(2)d-associated complex component
FBgn0031030	Tao	Tao
FBgn0031051	Ranbp21	Ranbp21
FBgn0031052	Elys	-
FBgn0031098	CG17068	-
FBgn0031170	Abca3	ATP binding cassette subfamily A member 3
FBgn0031174	CG1486	-
FBgn0031187	Usp2	Ubiquitin specific protease 2
FBgn0031191	Cp110	Centriolar coiled coil protein 110kDa
FBgn0031233	Tbc1d15-17	TBC1 domain family member 15/17
FBgn0031285	CG3662	-
FBgn0031374	Wdr62	WD repeat domain 62
FBgn0031384	CG4238	-
FBgn0031390	tho2	tho2
FBgn0031399	mio	missing oocyte
FBgn0031420	Atxn7	Ataxin 7
FBgn0031456	Tnpo-SR	Transportin-Serine/Arginine rich
FBgn0031474	CG2991	-
FBgn0031540	Pif1	Pif1 DNA helicase
FBgn0031573	CG3407	-
FBgn0031606	CG15439	-
FBgn0031608	CG15435	-
FBgn0031635	tank	tank
FBgn0031673	CG31650	-
FBgn0031683	CG4230	-
FBgn0031696	Bub1	Bub1 kinase
FBgn0031698	Ncoa6	Nuclear receptor coactivator 6
FBgn0031738	CG9171	-
FBgn0031759	Kdm5	Lysine demethylase 5
FBgn0031799	Pez	Pez
FBgn0031814	retm	real-time
FBgn0031820	Daxx	Daxx-like protein
FBgn0031878	sip2	septin interacting protein 2
FBgn0031885	Mnn1	Menin 1
FBgn0031981	Megf8	Multiple EGF like domains 8
FBgn0031990	PAPLA1	Phosphatidic Acid Phospholipase A1
FBgn0032018	CG7806	-
FBgn0032051	CG13097	-
FBgn0032079	CG31886	-
FBgn0032120	CG33298	-
FBgn0032123	Oatp30B	Organic anion transporting polypeptide 30B
FBgn0032130	brwl	brickwall
FBgn0032208	Ufd4	Ubiquitin fusion-degradation 4-like
FBgn0032256	RluA-2	RluA pseudouridine synthase 2
FBgn0032295	CG12299	-
FBgn0032339	Wdr59	WD repeat domain 59
FBgn0032341	Reps	RALBP1 associated Eps domain containing
FBgn0032348	CG4751	-
FBgn0032363	Dlg5	Discs large 5
FBgn0032395	Wdr81	WD repeat domain 81
FBgn0032398	CG6766	-
FBgn0032454	CG5787	-
FBgn0032456	MRP	Multidrug-Resistance like Protein 1
FBgn0032467	Ube4B	Ubiquitination factor E4B
FBgn0032475	Sfmbt	Scm-related gene containing four mbt domains
FBgn0032479	CG16974	-
FBgn0032481	CG16972	-
FBgn0032517	CG7099	-
FBgn0032587	CG5953	-
FBgn0032723	ssp3	short spindle 3
FBgn0032876	Cen	Centrocortin
FBgn0032901	sky	skywalker
FBgn0032934	CG8679	-
FBgn0032940	Mondo	Mondo
FBgn0032957	CG2225	-
FBgn0033051	Strica	Ser/Thr-rich caspase
FBgn0033052	SCAP	SREBP cleavage activating protein
FBgn0033062	Ars2	Arsenic resistance protein 2
FBgn0033121	Cyp6u1	Cytochrome P450 6u1
FBgn0033122	CG17002	-
FBgn0033155	Br140	Bromodomain-containing protein, 140kD
FBgn0033177	CG11141	-
FBgn0033194	Vps13	Vacuolar protein sorting 13
FBgn0033233	Kdm4A	Lysine demethylase 4A
FBgn0033313	Cirl	Calcium-independent receptor for alpha-latrotoxin
FBgn0033352	PAN2	Poly(A)-binding protein-dependent poly(A) ribonuclease 2
FBgn0033354	FANCI	Fanconi anemia complementation group I
FBgn0033453	Sting	Sting
FBgn0033454	CG1671	-
FBgn0033460	Sec24AB	Secretory 24AB
FBgn0033479	PIG-N	Phosphatidylinositol glycan anchor biosynthesis class N
FBgn0033609	Fbl6	F-box and leucine-rich repeat protein 6
FBgn0033638	atos	atossa
FBgn0033661	CG13185	-
FBgn0033688	Prp8	pre-mRNA processing factor 8
FBgn0033698	CG8858	-
FBgn0033713	CG8841	-
FBgn0033738	DUBAI	Deubiquitinating apoptotic inhibitor
FBgn0033766	Nup188	Nucleoporin 188kDa
FBgn0033806	FLASH	FLICE-associated huge protein
FBgn0033814	Qsox1	Quiescin sulfhydryl oxidase 1
FBgn0033859	fand	fandango
FBgn0033889	CG6701	-
FBgn0033915	Snrk	SNF related kinase
FBgn0034009	CG8155	-
FBgn0034021	CG8180	-
FBgn0034025	Pgant1	Polypeptide N-Acetylgalactosaminyltransferase 1
FBgn0034060	Tmem131	Transmembrane protein 131
FBgn0034071	CG8405	-
FBgn0034072	Dg	Dystroglycan
FBgn0034073	CG8414	-
FBgn0034098	krimp	krimper
FBgn0034113	CG8060	-
FBgn0034180	Ehbp1	Eps15 homology domain containing protein-binding protein 1
FBgn0034240	MESR4	Misexpression suppressor of ras 4
FBgn0034246	Dcr-2	Dicer-2
FBgn0034249	RhoGAP54D	Rho GTPase activating protein at 54D
FBgn0034271	Vps50	Vacuolar protein sorting 50
FBgn0034277	OstDelta	Oligosaccharide transferase Delta subunit
FBgn0034300	CG5098	-
FBgn0034400	CG15099	-
FBgn0034491	Hsl	Hormone-sensitive lipase
FBgn0034498	CG16868	-
FBgn0034590	Magi	Magi
FBgn0034598	CG4266	-
FBgn0034606	ASPP	Ankyrin-repeat, SH3-domain, and Proline-rich-region containing Protein
FBgn0034618	CG9485	-
FBgn0034691	Synj	Synaptojanin
FBgn0034722	Rtf1	Rtf1
FBgn0034734	CG4554	-
FBgn0034854	Golgin245	Golgin-245
FBgn0034878	pita	pita
FBgn0034964	IntS1	Integrator 1
FBgn0034976	CG4049	-
FBgn0034997	CG3376	-
FBgn0035001	Slik	Sterile20-like kinase
FBgn0035060	Eps-15	Epidermal growth factor receptor pathway substrate clone 15
FBgn0035073	CG16896	-
FBgn0035106	rno	rhinoceros
FBgn0035111	Dis3l2	Dis3 like 3'-5' exoribonuclease 2
FBgn0035113	pyx	pyrexia
FBgn0035121	Tudor-SN	Tudor staphylococcal nuclease
FBgn0035142	Hipk	Homeodomain interacting protein kinase
FBgn0035145	MED14	Mediator complex subunit 14
FBgn0035162	Sf3b3	Splicing factor 3b subunit 3
FBgn0035207	Herc4	HECT and RLD domain containing E3 ubiquitin ligase 4
FBgn0035229	pns	pinstripe
FBgn0035266	Gk2	Glycerol kinase 2
FBgn0035267	CG13921	-
FBgn0035333	CG1317	-
FBgn0035420	hob	hobbit
FBgn0035464	PIG-B	Phosphatidylinositol glycan anchor biosynthesis class B
FBgn0035497	CG14995	-
FBgn0035498	Fit1	Fermitin 1
FBgn0035523	Ctl1	Choline transporter-like 1
FBgn0035617	l(3)psg2	lethal (3) persistent salivary gland 2
FBgn0035622	TM9SF3	Transmembrane 9 superfamily protein member 3
FBgn0035625	Blimp-1	Blimp-1
FBgn0035766	eco	Establishment of cohesion
FBgn0035771	Sec63	Secretory 63
FBgn0035793	CG7546	-
FBgn0035802	Pura	Puratrophin-1-like
FBgn0035812	CG7457	-
FBgn0035842	Setx	Senataxin
FBgn0035848	Uxs	UDP-xylose synthase
FBgn0035850	Atg18a	Autophagy-related 18a
FBgn0035879	GAPcenA	GTPase activating protein and centrosome-associated
FBgn0035888	CG7120	-
FBgn0035918	Cdc6	Cdc6
FBgn0035983	CG4080	-
FBgn0036004	Jarid2	Jumonji, AT rich interactive domain 2
FBgn0036032	CG16711	-
FBgn0036039	Naa60	N(alpha)-acetyltransferase 60
FBgn0036043	Ae2	Anion exchanger 2
FBgn0036124	CG7839	-
FBgn0036141	wls	wntless
FBgn0036147	Plod	procollagen lysyl hydroxylase
FBgn0036340	Srrm1	Serine-arginine repetitive matrix 1
FBgn0036374	Spt20	Spt20
FBgn0036386	CG8833	-
FBgn0036398	upSET	upSET
FBgn0036402	CG6650	-
FBgn0036448	mop	myopic
FBgn0036449	bmm	brummer
FBgn0036451	Helz	Helicase with zinc finger
FBgn0036483	CG12316	-
FBgn0036509	CG7739	-
FBgn0036518	RhoGAP71E	Rho GTPase activating protein at 71E
FBgn0036522	Phs	Phaser
FBgn0036534	DCP2	Decapping protein 2
FBgn0036544	sff	sugar-free frosting
FBgn0036566	ClC-c	Chloride channel-c
FBgn0036574	elg1	enhanced level of genomic instability 1
FBgn0036668	Zcchc7	Zinc finger CCHC-type containing 7
FBgn0036686	CG7728	-
FBgn0036710	CG6479	-
FBgn0036714	CG7692	-
FBgn0036735	Edc3	Enhancer of decapping 3
FBgn0036746	Crtc	CREB-regulated transcription coactivator
FBgn0036814	CG14073	-
FBgn0036842	Ugt316A1	UDP-glycosyltransferase family 316 member A1
FBgn0036913	Usp32	Ubiquitin specific protease 32
FBgn0036980	RhoBTB	Rho-related BTB domain containing
FBgn0037021	Pcif1	Phosphorylated CTD-interacting factor 1
FBgn0037074	Tbc1d8-9	TBC1 domain family member 8/9
FBgn0037093	Cdk12	Cyclin-dependent kinase 12
FBgn0037094	CG7611	-
FBgn0037116	Als2	Amyotrophic lateral sclerosis 2
FBgn0037142	CG14562	-
FBgn0037234	CG9795	-
FBgn0037236	Skp2	S-phase kinase-associated protein 2
FBgn0037248	srl	spargel
FBgn0037282	CG14657	-
FBgn0037327	PEK	pancreatic eIF-2alpha kinase
FBgn0037339	Pi4KIIalpha	Phosphatidylinositol 4-kinase II alpha
FBgn0037344	CG2926	-
FBgn0037363	Atg17	Autophagy-related 17
FBgn0037445	CG9727	-
FBgn0037530	EMC1	ER membrane protein complex subunit 1
FBgn0037541	CG2747	-
FBgn0037554	PolI	DNA polymerase iota
FBgn0037556	CG9636	-
FBgn0037573	CG7483	-
FBgn0037657	hyx	hyrax
FBgn0037702	CG8176	-
FBgn0037705	mura	murashka
FBgn0037716	Son	Son RNA binding protein
FBgn0037720	CG8312	-
FBgn0037757	CG8516	-
FBgn0037770	Art4	Arginine methyltransferase 4
FBgn0037792	TAF1B	TATA box-binding protein-associated factor RNA polymerase I subunit B
FBgn0037814	CG6325	-
FBgn0037831	Cap-H2	Chromosome associated protein H2
FBgn0037838	TTLL15	Tubulin tyrosine ligase-like 15
FBgn0037894	Ipo9	Importin 9
FBgn0037897	CG5270	-
FBgn0037918	CG6791	-
FBgn0037924	CG14712	-
FBgn0037943	CG14722	-
FBgn0037944	CG6923	-
FBgn0037949	prd1	pruning defect 1
FBgn0038197	foxo	forkhead box, sub-group O
FBgn0038223	Afti	Aftiphilin
FBgn0038244	CG7987	-
FBgn0038269	Rrp6	Rrp6
FBgn0038274	Nup93-2	Nucleoporin 93kD-2
FBgn0038300	Mau2	Mau2 sister chromatid cohesion factor
FBgn0038320	Cyfip	Cytoplasmic FMR1 interacting protein
FBgn0038344	obe	obelus
FBgn0038427	ema	endosomal maturation defective
FBgn0038475	Keap1	Keap1
FBgn0038478	cal1	chromosome alignment defect 1
FBgn0038488	m-cup	mann-cup
FBgn0038499	Brf	Brf RNA polymerase III subunit
FBgn0038504	Sur-8	Sur-8
FBgn0038532	CG14322	-
FBgn0038601	Polr1E	RNA polymerase I subunit E
FBgn0038651	Epg5	ectopic P-granules autophagy protein 5
FBgn0038721	subdued	subdued
FBgn0038755	Hs6st	Heparan sulfate 6-O-sulfotransferase
FBgn0038816	Lrrk	Leucine-rich repeat kinase
FBgn0038827	Fancd2	Fancd2
FBgn0038853	RhoGAP93B	Rho GTPase activating protein at 93B
FBgn0038872	Nelf-A	Negative elongation factor A
FBgn0038881	aus	argus
FBgn0038968	CG12499	-
FBgn0039004	Nup133	Nucleoporin 133kD
FBgn0039026	CG7029	-
FBgn0039056	CenB1A	Centaurin beta 1A
FBgn0039157	Myo95E	Myosin 95E
FBgn0039186	CG5746	-
FBgn0039187	CG6454	-
FBgn0039207	Cftr	CF transmembrane conductance regulator
FBgn0039209	REPTOR	Repressed by TOR
FBgn0039214	puf	puffyeye
FBgn0039234	Nct	Nicastrin
FBgn0039240	CG3744	-
FBgn0039260	Smg6	Smg6
FBgn0039261	Ythdf	YTH N6-methyladenosine RNA binding protein
FBgn0039338	XNP	XNP
FBgn0039451	CG6420	-
FBgn0039466	CG5521	-
FBgn0039492	CG6051	-
FBgn0039528	dsd	distracted
FBgn0039559	NSD	Nuclear receptor binding SET domain protein
FBgn0039602	CG1647	-
FBgn0039623	CG1951	-
FBgn0039668	Trc8	TRC8 ring finger protein
FBgn0039680	Cap-D2	CAP-D2 condensin subunit
FBgn0039696	Rnb	R and B
FBgn0039773	CG2224	-
FBgn0039831	CG12054	-
FBgn0039858	CycG	Cyclin G
FBgn0039863	CG1815	-
FBgn0039904	Hcf	Host cell factor
FBgn0039907	lgs	legless
FBgn0039914	mav	maverick
FBgn0039923	MED26	Mediator complex subunit 26
FBgn0040011	Slmap	Sarcolemma associated protein
FBgn0040022	Set1	SET domain containing 1
FBgn0040080	pins	partner of inscuteable
FBgn0040230	dbo	diablo
FBgn0040233	cana	CENP-ana
FBgn0040236	c11.1	c11.1
FBgn0040271	Sulf1	Sulfated
FBgn0040273	Spt5	Spt5
FBgn0040324	Ephrin	Ephrin
FBgn0040372	G9a	G9a
FBgn0040388	boi	brother of ihog
FBgn0040397	CG3655	-
FBgn0040505	Alk	Anaplastic lymphoma kinase
FBgn0040752	Prosap	Prosap
FBgn0041094	scyl	scylla
FBgn0041150	hoe1	hoepel1
FBgn0041171	ago	archipelago
FBgn0041210	HDAC4	Histone deacetylase 4
FBgn0041582	tamo	tamo
FBgn0041604	dlp	dally-like
FBgn0041605	cpx	complexin
FBgn0041789	Pax	Paxillin
FBgn0042085	Bap170	Brahma associated protein 170kD
FBgn0043456	Ndf	Nucleosome-destabilizing factor
FBgn0043458	CG12084	-
FBgn0043854	slam	slow as molasses
FBgn0043884	mask	multiple ankyrin repeats single KH domain
FBgn0043903	dome	domeless
FBgn0044323	Cka	Connector of kinase to AP-1
FBgn0044452	Atg2	Autophagy-related 2
FBgn0045063	fdl	fused lobes
FBgn0046704	Liprin-alpha	Liprin-alpha
FBgn0050011	gem	gemini
FBgn0050020	CG30020	-
FBgn0050085	Rif1	Rap1 interacting factor 1
FBgn0050122	CG30122	-
FBgn0050295	Ipk1	Inositol phosphate kinase 1
FBgn0050344	CG30344	-
FBgn0050372	Asap	ArfGAP with SH3 domain, ankyrin repeat and PH domain
FBgn0050440	CG30440	-
FBgn0051140	CG31140	-
FBgn0051151	wge	winged eye
FBgn0051158	Efa6	Exchange factor for Arf 6
FBgn0051159	mRRF2	mitochondrial ribosome recycling factor 2
FBgn0051163	SKIP	Shal K[+] channel interacting protein
FBgn0051195	CG31195	-
FBgn0051224	CG31224	-
FBgn0051365	CG31365	-
FBgn0051368	CG31368	-
FBgn0051510	CG31510	-
FBgn0051523	CG31523	-
FBgn0051619	nolo	no long nerve cord
FBgn0051635	CG31635	-
FBgn0051678	CG31678	-
FBgn0051729	CG31729	-
FBgn0051755	SoYb	Sister of Yb
FBgn0051793	CG31793	-
FBgn0051849	Mgat3	beta-1,4-mannosyl-glycoprotein 4-beta-N-acetylglucosaminyltransferase
FBgn0051935	Rab3GAP1	RAB3 GTPase activating protein catalytic subunit 1
FBgn0051992	gw	gawky
FBgn0051998	CG31998	-
FBgn0052000	anne	anne boleyn
FBgn0052016	4E-T	eIF4E-Transporter
FBgn0052062	Rbfox1	RNA-binding Fox protein 1
FBgn0052103	SCaMC	Short Calcium-binding Mitochondrial Carrier
FBgn0052251	Claspin	Claspin
FBgn0052296	Mrtf	Myocardin-related transcription factor
FBgn0052365	CG32365	-
FBgn0052479	Usp10	Ubiquitin specific protease 10
FBgn0052521	Mnr	Membrane-bound Notch regulator
FBgn0052529	Hers	Histone gene-specific Epigenetic Repressor in late S phase
FBgn0052654	Sec16	Secretory 16
FBgn0052676	stx	stuxnet
FBgn0052685	ZAP3	ZAP3
FBgn0052758	Snx27	Sorting nexin 27
FBgn0052767	CG32767	-
FBgn0052791	DIP-alpha	Dpr-interacting protein alpha
FBgn0052982	CG32982	-
FBgn0053087	LRP1	LDL receptor protein 1
FBgn0053111	CG33111	-
FBgn0053144	CG33144	-
FBgn0053145	GalT1	beta1,3-galactosyltransferase 1
FBgn0053180	Ranbp16	Ranbp16
FBgn0053182	Kdm4B	Lysine demethylase 4B
FBgn0053208	Mical	Molecule interacting with CasL
FBgn0053526	PNUTS	Phosphatase 1 nuclear targeting subunit
FBgn0053554	Nipped-A	Nipped-A
FBgn0053558	mim	missing-in-metastasis
FBgn0061200	Nup153	Nucleoporin 153kD
FBgn0066101	LpR1	Lipophorin receptor 1
FBgn0082831	pps	protein partner of snf
FBgn0083940	RhoU	RhoU
FBgn0083956	CG34120	-
FBgn0083962	CG34126	-
FBgn0083969	CG34133	-
FBgn0083977	CG34141	-
FBgn0085245	CG34216	-
FBgn0085370	Pde11	Phosphodiesterase 11
FBgn0085376	CG34347	-
FBgn0085400	side-V	sidestep V
FBgn0085412	kmr	kramer
FBgn0085423	GramD1B	GRAM domain containing 1B
FBgn0085430	Dora	Dorado
FBgn0085436	Not1	Not1
FBgn0085443	spri	sprint
FBgn0085446	CG34417	-
FBgn0085451	htk	hat-trick
FBgn0085478	Zdhhc8	Zinc finger DHHC-type containing 8
FBgn0086129	snama	something that sticks like glue
FBgn0086384	Mer	Merlin
FBgn0086442	mib2	mind bomb 2
FBgn0086532	Spt-I	Serine palmitoyltransferase subunit I
FBgn0086655	jing	jing
FBgn0086686	l(3)L1231	lethal (3) L1231
FBgn0086690	Plp	Pericentrin-like protein
FBgn0086711	mol	moladietz
FBgn0086784	stmA	stambha A
FBgn0087007	bbg	big bang
FBgn0087035	AGO2	Argonaute 2
FBgn0243511	psidin	phagocyte signaling impaired
FBgn0250732	gfzf	GST-containing FLYWCH zinc-finger protein
FBgn0250754	CG42232	-
FBgn0250786	Chd1	Chromodomain-helicase-DNA-binding protein 1
FBgn0250816	AGO3	Argonaute 3
FBgn0250850	rig	rigor mortis
FBgn0250867	CG42238	-
FBgn0259111	Ndae1	Na[+]-driven anion exchanger 1
FBgn0259113	PolA1	DNA polymerase alpha subunit 1
FBgn0259166	CG42271	-
FBgn0259168	mnb	minibrain
FBgn0259170	alpha-Man-Ia	alpha-Mannosidase class I a
FBgn0259174	Nedd4	Nedd4
FBgn0259176	bun	bunched
FBgn0259212	cno	canoe
FBgn0259214	PMCA	plasma membrane calcium ATPase
FBgn0259221	ATP8A	ATPase 8A
FBgn0259227	CG42327	-
FBgn0259228	C3G	C3G guanyl-nucleotide exchange factor
FBgn0259677	CG42346	-
FBgn0259685	crb	crumbs
FBgn0259734	Nost	Nostrin
FBgn0259735	mtgo	miles to go
FBgn0259745	wech	wech
FBgn0259785	pzg	putzig
FBgn0259791	bora	aurora borealis
FBgn0259824	Hip14	Huntingtin-interacting protein 14
FBgn0259876	Cap-G	Chromosome associated protein G
FBgn0259938	cwo	clockwork orange
FBgn0259984	kuz	kuzbanian
FBgn0260003	Dys	Dystrophin
FBgn0260012	pds5	precocious dissociation of sisters 5
FBgn0260243	E(var)3-9	Enhancer of variegation 3-9
FBgn0260397	Su(var)3-3	Suppressor of variegation 3-3
FBgn0260399	gwl	greatwall
FBgn0260450	CalpC	Calpain C
FBgn0260639	gammaTub23C	gamma-Tubulin at 23C
FBgn0260655	l(3)76BDm	lethal (3) 76BDm
FBgn0260742	CG12213	-
FBgn0260789	mxc	multi sex combs
FBgn0260794	ctrip	circadian trip
FBgn0260934	par-1	par-1
FBgn0260936	scny	scrawny
FBgn0260938	tay	tay bridge
FBgn0260962	pic	piccolo
FBgn0260965	CG42588	-
FBgn0260970	Ubr3	Ubr3 ubiquitin ligase
FBgn0261016	clos	closca
FBgn0261244	inaE	inactivation no afterpotential E
FBgn0261278	grp	grapes
FBgn0261283	SREBP	Sterol regulatory element binding protein
FBgn0261385	scra	scraps
FBgn0261397	didum	dilute class unconventional myosin
FBgn0261444	CG3638	-
FBgn0261461	RhoGAP18B	Rho GTPase activating protein at 18B
FBgn0261477	slim	scruin like at the midline
FBgn0261532	cdm	cadmus
FBgn0261547	Exn	Ephexin
FBgn0261550	Orp8	Oxysterol-binding protein-related protein 8
FBgn0261553	CG42671	-
FBgn0261555	CG42673	-
FBgn0261570	raskol	raskol
FBgn0261574	kug	kugelei
FBgn0261610	CG42699	-
FBgn0261617	nej	nejire
FBgn0261618	larp	La related protein
FBgn0261647	Axud1	AXIN1 up-regulated 1
FBgn0261649	tinc	tincar
FBgn0261671	tweek	tweek
FBgn0261674	CG42709	-
FBgn0261698	SLO2	slowpoke 2
FBgn0261703	gce	germ cell-expressed bHLH-PAS
FBgn0261710	nocte	no circadian temperature entrainment
FBgn0261786	mi	minus
FBgn0261787	brun	brunelleschi
FBgn0261793	Trf2	TATA box binding protein-related factor 2
FBgn0261794	kcc	kazachoc
FBgn0261797	Dhc64C	Dynein heavy chain 64C
FBgn0261802	CG42748	-
FBgn0261822	Bsg	Basigin
FBgn0261859	CG42788	-
FBgn0261862	whd	withered
FBgn0261873	sdt	stardust
FBgn0261931	Hecw	Hecw ubiquitin protein ligase
FBgn0261934	dikar	dikar
FBgn0261954	east	enhanced adult sensory threshold
FBgn0261984	Ire1	Inositol-requiring enzyme-1
FBgn0261988	Gprk2	G protein-coupled receptor kinase 2
FBgn0262081	Csk	C-terminal Src kinase
FBgn0262103	Sik3	Salt-inducible kinase 3
FBgn0262124	uex	unextended
FBgn0262127	kibra	kibra
FBgn0262167	ana1	anastral spindle 1
FBgn0262169	magu	magu
FBgn0262473	Tl	Toll
FBgn0262517	Ltn1	Listerin E3 ubiquitin protein ligase 1
FBgn0262519	Mi-2	Mi-2
FBgn0262527	nsl1	non-specific lethal 1
FBgn0262579	Sarm	Sterile alpha and Armadillo motif
FBgn0262582	cic	capicua
FBgn0262614	pyd	polychaetoid
FBgn0262730	dtn	detonator
FBgn0262733	Src64B	Src oncogene at 64B
FBgn0262734	eIF4H1	eukaryotic translation initiation factor 4H1
FBgn0262739	AGO1	Argonaute-1
FBgn0262866	S6kII	Ribosomal protein S6 kinase II
FBgn0262871	lute	lute
FBgn0262872	milt	milton
FBgn0262975	cnc	cap-n-collar
FBgn0263005	Chpf	Chondroitin polymerizing factor
FBgn0263006	SERCA	Sarco/endoplasmic reticulum Ca(2+)-ATPase
FBgn0263048	Gpdh3	Glycerol-3-phosphate dehydrogenase 3
FBgn0263102	psq	pipsqueak
FBgn0263110	CG43367	-
FBgn0263132	Cht6	Chitinase 6
FBgn0263144	bin3	bicoid-interacting protein 3
FBgn0263197	Patronin	Patronin
FBgn0263232	Nxf3	Nuclear export factor 3
FBgn0263258	chas	chascon
FBgn0263289	scrib	scribble
FBgn0263346	smash	smallish
FBgn0263352	Unr	Upstream of N-ras
FBgn0263391	hts	hu li tai shao
FBgn0263395	hppy	happyhour
FBgn0263396	sqd	squid
FBgn0263593	Lpin	Lipin
FBgn0263706	CG43658	-
FBgn0263855	BubR1	Bub1-related kinase
FBgn0263929	jvl	javelin-like
FBgn0263933	ebi	ebi
FBgn0263968	nonC	no-on-and-no-off transient C
FBgn0263974	qin	qin
FBgn0263980	Stacl	Stac-like
FBgn0263993	CG43736	-
FBgn0263998	Ack-like	Activated Cdc42 kinase-like
FBgn0264075	tgo	tango
FBgn0264090	CG43759	-
FBgn0264305	CG43783	-
FBgn0264307	orb2	orb2
FBgn0264324	spg	sponge
FBgn0264326	PolE1	DNA polymerase epsilon subunit 1
FBgn0264357	SNF4Agamma	SNF4/AMP-activated protein kinase gamma subunit
FBgn0264495	gpp	grappa
FBgn0264560	garz	gartenzwerg
FBgn0264693	ens	ensconsin
FBgn0264707	RhoGEF3	Rho guanine nucleotide exchange factor 3
FBgn0264895	RapGAP1	Rap GTPase activating protein 1
FBgn0264953	Piezo	Piezo
FBgn0264959	Src42A	Src oncogene at 42A
FBgn0264975	Nrg	Neuroglian
FBgn0265045	Strn-Mlck	Stretchin-Mlck
FBgn0265140	Meltrin	Meltrin
FBgn0265194	Trpm	Transient receptor potential cation channel, subfamily M
FBgn0265276	l(3)neo38	lethal (3) neo38
FBgn0265523	Smr	Smrter
FBgn0265574	Cdc5	Cell division cycle 5
FBgn0265778	PDZ-GEF	PDZ domain-containing guanine nucleotide exchange factor
FBgn0265998	Doa	Darkener of apricot
FBgn0266000	CG44774	-
FBgn0266019	rudhira	rudhira
FBgn0266053	Patr-1	Protein associated with topo II related - 1
FBgn0266083	ocm	over compensating males
FBgn0266084	Fhos	Formin homology 2 domain containing
FBgn0266098	rg	rugose
FBgn0266111	ana3	anastral spindle 3
FBgn0266409	CG45049	-
FBgn0266411	sima	similar
FBgn0266418	wake	wide awake
FBgn0266557	kis	kismet
FBgn0266572	ebo	ellipsoid body open
FBgn0266580	Gp210	Glycoprotein 210 kDa
FBgn0266696	Svil	Supervillin
FBgn0266717	Bruce	BIR repeat containing ubiquitin-conjugating enzyme
FBgn0266719	stac	staccato
FBgn0266756	btsz	bitesize
FBgn0266801	CG45263	-
FBgn0266848	wap	wings apart
FBgn0266916	Cenp-C	Centromeric protein-C
FBgn0266917	Sf3a1	Splicing factor 3a subunit 1
FBgn0267001	Ten-a	Tenascin accessory
FBgn0267002	unc-104	uncoordinated-104
FBgn0267390	dop	drop out
FBgn0267488	Mcr	Macroglobulin complement-related
FBgn0267821	da	daughterless
FBgn0268063	ltl	larval translucida
FBgn0278604	dmt	dalmatian
FBgn0278608	Dsp1	Dorsal switch protein 1
FBgn0283427	FASN1	Fatty acid synthase 1
FBgn0283499	InR	Insulin-like receptor
FBgn0283521	lola	longitudinals lacking
FBgn0283531	Duox	Dual oxidase
FBgn0283657	Tlk	Tousled-like kinase
FBgn0283682	Ge-1	Ge-1
FBgn0283712	LIMK1	LIM domain kinase 1
FBgn0283741	prage	prage
FBgn0284221	Sema5c	Semaphorin 5c
FBgn0284408	trol	terribly reduced optic lobes
FBgn0285913	red	red Malpighian tubules
FBgn0285917	sbb	scribbler
FBgn0285925	Fas1	Fasciclin 1
FBgn0286051	Rexo5	RNA exonuclease 5
FBgn0286070	cnk	connector enhancer of ksr
FBgn0286511	Pld	Phospholipase D
FBgn0286567	gry	gryzun
FBgn0286788	Orc1	Origin recognition complex subunit 1
FBgn0286809	xmas	xmas
FBgn0287182	l(3)80Fj	lethal (3) 80Fj
FBgn0287478	Camta	Calmodulin-binding transcription activator
FBgn0287725	sov	small ovary
FBgn0287873	zip	zipper
FBgn0288229	CG3164	-
FBgn0288469	Pex23	Peroxin 23
FBgn0000117	arm	armadillo
FBgn0000319	Chc	Clathrin heavy chain
FBgn0000416	Sap-r	Saposin-related
FBgn0001105	Gbeta13F	G protein beta-subunit 13F
FBgn0003231	ref(2)P	refractory to sigma P
FBgn0003261	Rm62	Rm62
FBgn0020370	TppII	Tripeptidyl-peptidase II
FBgn0022213	Cse1	Chromosome segregation 1
FBgn0025741	PlexA	Plexin A
FBgn0026207	mbo	members only
FBgn0027588	GCS2alpha	Glucosidase 2 alpha subunit
FBgn0028695	Rpn1	Regulatory particle non-ATPase 1
FBgn0031149	Stt3A	Catalytic subunit 3A of the oligosaccharyltransferase complex
FBgn0033247	Nup44A	Nucleoporin at 44A
FBgn0034258	eIF3c	eukaryotic translation initiation factor 3 subunit c
FBgn0035397	PAN3	Poly(A) specific ribonuclease subunit PAN3
FBgn0037249	eIF3a	eukaryotic translation initiation factor 3 subunit a
FBgn0039073	CG4408	-
FBgn0039560	BOD1	Biorientation Defective 1
FBgn0039936	Gyf	Gigyf
FBgn0052190	NUCB1	Nucleobindin 1
FBgn0260462	CtsF	Cathepsin F
FBgn0261403	sxc	super sex combs
FBgn0262117	IntS3	Integrator 3
FBgn0263599	Brr2	Brr2 U5 snRNP complex subunit
FBgn0266410	CG45050	-
FBgn0267487	Ptp61F	Protein tyrosine phosphatase 61F
FBgn0000116	Argk1	Arginine kinase 1
FBgn0000721	for	foraging
FBgn0003015	osk	oskar
FBgn0003464	sol	small optic lobes
FBgn0010300	brat	brain tumor
FBgn0010415	Sdc	Syndecan
FBgn0014075	Uggt	UDP-glucose-glycoprotein glucosyltransferase
FBgn0023213	eIF4G1	eukaryotic translation initiation factor 4G1
FBgn0025639	Hmt4-20	Histone methyltransferase 4-20
FBgn0026428	HDAC6	Histone deacetylase 6
FBgn0027616	Ythdc1	YTH domain containing 1
FBgn0030034	CG10555	-
FBgn0030049	Trf4-1	Topoisomerase related function 4-1
FBgn0030366	Usp7	Ubiquitin-specific protease 7
FBgn0031836	CG11050	-
FBgn0032748	CG10492	-
FBgn0033482	CG1371	-
FBgn0035959	CG4911	-
FBgn0037336	CG2519	-
FBgn0038108	CG7518	-
FBgn0039113	udt	undicht
FBgn0039117	tst	twister
FBgn0039120	Nup98-96	Nucleoporin 98-96kD
FBgn0039302	Nup358	Nucleoporin 358kD
FBgn0039543	CROT	Carnitine O-octanoyltransferase
FBgn0039644	rdog	red dog mine
FBgn0040208	Kat60	Katanin 60
FBgn0043900	pygo	pygopus
FBgn0052451	SPoCk	Secretory Pathway Calcium atpase
FBgn0086694	Bre1	Bre1
FBgn0087013	Karybeta3	Karyopherin beta 3
FBgn0264561	Glg1	Golgi complex-localized glycoprotein 1
FBgn0264817	pre-lola-G	pre-lola-G
